# Supplementary material
Source: Research Square preprint supplement (doi:10.21203/rs.3.rs-8993465/v1)
Supplement: Supplementary file 1 [file a2b9b5a27fa4693a017b4c80.xlsx]

## Sheet: README
Tables	Description
Supplementary Table 1	Description of the GWAS cohorts used for Amyotrophic Lateral Sclerosis(ALS).
Supplementary Table 2	The genes mapped with posMap and eqtlMap using FUMA(Stage1).
Supplementary Table 3	The genes mapped with posMap and eqtlMap using FUMA(Stage2).
Supplementary Table 4	Gene-based association analyses result using MAGMA from ALS GWAS meta-analyses(P.fdr< 0.05).
Supplementary Table 5	Pathways for ALS using MAGMA from Gene Ontology pathway database obtained from the MSigDB(P.fdr< 0.05).
Supplementary Table 6	Tissue prioritization for ALS using MAGMA Gene-property analysis of GTEx v8 gene expression datasets(Tissue N = 54) combined with Stage2 GWAS meta-analysis as implemented in FUMA(P.fdr< 0.05).
Supplementary Table 7	Multi-omics used in Transcriptome-wide association study (TWAS) and Results from Summary-data-based Mendelian (SMR) analysis.
Supplementary Table 8	Transcriptome-wide association studies for ALS(P.fdr< 0.05).
Supplementary Table 9	Summary-data-based Mendelian Randomization for ALS(P.fdr< 0.05).
Supplementary Table 10	Summary-data-based Mendelian (SMR) analysis between eQTLs (eQTLs, N=192) expression in Cells using SMR(P.fdr< 0.05).
Supplementary Table 11	Summary-data-based Mendelian (SMR) analysis between eQTLs (eQTLs, N=424) expression in Cells using SMR(P.fdr< 0.05).
Supplementary Table 12	Results of gene prioritization.
Supplementary Table 13	Differential expression analysis in RNA-seq of cervical spinal cords.
Supplementary Table 14	Differential expression analysis in RNA-seq of cervical, thoracic and lumbar.
Supplementary Table 15	Differential expression analysis in RNA-seq of Motor Cortex.
Supplementary Table 16	Differential expression analysis in snRNA-seq of cervical spinal cords.
Supplementary Table 17	Results of prioritization genes potential drugs identification from the Drug-Gene Interaction Database.
Supplementary Table 18	Description of the phenotype GWAS used in genetic correlation analysis.
Supplementary Table 19	Results of genetic correlation of ALS and other phenotype.

## Sheet: STable1
Supplementary Table1 Description of the GWAS cohorts used for Amyotrophic Lateral Sclerosis(ALS).
From	Analysis or Chorts	Ancestry	N	Lambda GC(LDSC)	Intercept	h2(total observed scale)
Van Rheenen, Wouter, et al.(2021)1	Chorts 1	European	138086	1.105	1.027 (0.0072)	0.0383 (0.0043)
Verma, Anurag, et al.(2024)2	Chorts 2	European	315668	1.0016	0.9928 (0.0067)	0.0022 (0.0015)
FinnGen(R12)3	Chorts 3	European	217427	1.0165	1.0133 (0.0075)	3.6563e-05 (0.0013)
Verma, Anurag, et al.(2024)2	Chorts 4	European and African	371173	0.9986	0.9975 (0.0062)	0.0013 (0.0019)
Benyamin, Beben, et al.(2017)4	Chorts 5	East Asian	4084	1.0165	1.0109 (0.0063)	0.1018 (0.1052)
Nakamura, Ryoichi, et al.(2020)5	Chorts 6	East Asian	10098	1.1491	1.114 (0.0085)	0.1205 (0.0574)
ours	Meta-analysis(Chorts 1 + Chorts 2 + Chorts 3)	European	671181	1.0988	1.0261 (0.0068)	0.0075 (0.0008)
	Multi-ancestry meta-analysis (Chorts 1 + Chorts 3 + Chorts 4 + Chorts 5 + Chorts 6)	European,African and East Asian	740868	1.1019	1.027 (0.0069)	0.0069 (0.0008)
1Van Rheenen, Wouter, et al. Common and rare variant association analyses in amyotrophic lateral sclerosis identify 15 risk loci with distinct genetic architectures and neuron-specific biology. Nature genetics 53.12 (2021): 1636-1648.
2Verma, Anurag, et al. Diversity and scale: Genetic architecture of 2068 traits in the VA Million Veteran Program.Science 385.6706 (2024): eadj1182.
3Kurki M I, Karjalainen J, Palta P, et al. FinnGen provides genetic insights from a well-phenotyped isolated population[J]. Nature, 2023, 613(7944): 508-518.
4Benyamin, Beben, et al. Cross-ethnic meta-analysis identifies association of the GPX3-TNIP1 locus with amyotrophic lateral sclerosis. Nature communications 8.1 (2017): 611.
5Nakamura, Ryoichi, et al. A multi-ethnic meta-analysis identifies novel genes, including ACSL5, associated with amyotrophic lateral sclerosis. Communications biology 3.1 (2020): 526.
Abbreviations: N, sample size; Lambda GC:Genomic Control lambda by LDSC; Intercept, LD score regression intercept; h2, SNP based heritability; Ratio, LD Score regression attenuation ratio.

## Sheet: STable2
Supplementary Table3 The genes mapped with posMap and eqtlMap using FUMA(Stage1).
ensg	symbol	chr	start	end	strand	type	entrezID	HUGO	pLI	ncRVIS	posMapSNPs	posMapMaxCADD	eqtlMapSNPs	eqtlMapminP	eqtlMapminQ	eqtlMapts	eqtlDirection	minGwasP	IndSigSNPs	GenomicLocus
ENSG00000118733	OLFM3	1	102268130	102462586	-1	protein_coding	118427	OLFM3	6.9679e-05	-0.772875	1	2.393	0	NA	NA	NA	NA	1.38e-08	rs535959354	1
ENSG00000143222	UFC1	1	161122566	161128646	1	protein_coding	51506	UFC1	0.0899542	-0.413933	1	6.068	0	NA	NA	NA	NA	NA	rs187245629	2
ENSG00000143258	USP21	1	161129240	161135513	1	protein_coding	27005	USP21	0.0746517	-0.568369	1	6.068	0	NA	NA	NA	NA	NA	rs187245629	2
ENSG00000143224	PPOX	1	161136200	161147803	1	protein_coding	5498	PPOX	0.328332	0.0105367	1	6.068	0	NA	NA	NA	NA	NA	rs187245629	2
ENSG00000158850	B4GALT3	1	161141100	161147287	-1	protein_coding	8703	B4GALT3	0.0208229	-0.655347	1	6.068	0	NA	NA	NA	NA	NA	rs187245629	2
ENSG00000158887	MPZ	1	161274525	161279762	-1	protein_coding	4359	MPZ	0.691716	-0.104424	1	2.499	0	NA	NA	NA	NA	NA	rs187245629	2
ENSG00000143252	SDHC	1	161284047	161332984	1	protein_coding	6391	SDHC	0.09542	-0.00729959	1	2.282	0	NA	NA	NA	NA	NA	rs187245629	2
ENSG00000203747	FCGR3A	1	161511549	161600917	-1	protein_coding	2214	FCGR3A	1.22274e-05	-0.16736	1	1.56	0	NA	NA	NA	NA	NA	rs187245629	2
ENSG00000072694	FCGR2B	1	161551101	161648444	1	protein_coding	2213	FCGR2B	0.0474026	-0.652848	1	3.199	0	NA	NA	NA	NA	NA	rs187245629	2
ENSG00000118217	ATF6	1	161736084	161933860	1	protein_coding	22926	ATF6	3.10665e-05	2.45191	2	9.858	0	NA	NA	NA	NA	NA	rs187245629	2
ENSG00000198929	NOS1AP	1	162039564	162353321	1	protein_coding	9722	NOS1AP	0.119914	0.721922	8	10.69	0	NA	NA	NA	NA	1.609e-08	rs187245629	2
ENSG00000162733	DDR2	1	162601163	162757190	1	protein_coding	4921	DDR2	0.990992	-0.0956258	1	2.422	0	NA	NA	NA	NA	NA	rs187245629	2
ENSG00000185860	C1orf110	1	162794248	162838605	-1	protein_coding	339512	C1orf110	1.05805e-05	-0.0813856	1	4.171	0	NA	NA	NA	NA	NA	rs187245629	2
ENSG00000143248	RGS5	1	163080911	163291577	-1	protein_coding	8490	RGS5	0.0404999	-0.30064	1	7.6	0	NA	NA	NA	NA	NA	rs187245629	2
ENSG00000114742	WDR48	3	39093489	39138155	1	protein_coding	57599	WDR48	0.999806	-0.643071	0	0	7	3.287e-07	0.0010722697409198	eQTLGen_cis_eQTLs	-	3.552e-10	rs9820623;rs631312	3
ENSG00000114745	GORASP1	3	39138150	39149854	-1	protein_coding	64689	GORASP1	0.698378	1.0762	0	0	3	0.00014877	0.0157936	GTEx/v8/Muscle_Skeletal	-	2.122e-08	rs9820623	3
ENSG00000168329	CX3CR1	3	39304985	39323226	-1	protein_coding	1524	CX3CR1	0.107292	0.274774	0	0	58	8.93741e-16	0	eQTLGen_cis_eQTLs:GTEx/v8/Muscle_Skeletal	-	3.709e-09	rs9820623;rs631312	3
ENSG00000144659	SLC25A38	3	39424839	39438842	1	protein_coding	54977	SLC25A38	0.0682178	-0.436245	0	0	57	3.0155e-12	0	eQTLGen_cis_eQTLs:GTEx/v8/Muscle_Skeletal	+	3.709e-09	rs9820623	3
ENSG00000168028	RPSA	3	39448180	39454033	1	protein_coding	574040	RPSA	0.751851	0.547666	0	0	78	8.7709e-20	0	eQTLGen_cis_eQTLs:GTEx/v8/Whole_Blood:GTEx/v8/Brain_Cerebellar_Hemisphere:GTEx/v8/Brain_Cerebellum:GTEx/v8/Brain_Cortex:GTEx/v8/Brain_Spinal_cord_cervical_c-1:GTEx/v8/Muscle_Skeletal	+	3.552e-10	rs9820623;rs631312	3
ENSG00000168314	MOBP	3	39508689	39570970	1	protein_coding	4336	MOBP	0.59201	2.19098	34	15.47	0	NA	NA	NA	NA	9.194e-11	rs9820623;rs631312	3
ENSG00000114650	SCAP	3	47455203	47518616	-1	protein_coding	22937	SCAP	0.0225548	NA	0	0	7	1.0935e-12	0	eQTLGen_cis_eQTLs:GTEx/v8/Brain_Caudate_basal_ganglia:GTEx/v8/Brain_Cortex	+	1.327e-08	rs34711187	4
ENSG00000114646	CSPG5	3	47603729	47622282	-1	protein_coding	10675	CSPG5	0.41483	-0.836073	1	0.295	0	NA	NA	NA	NA	7.965e-05	rs34711187	4
ENSG00000132153	DHX30	3	47844399	47891685	1	protein_coding	22907	DHX30	0.999999	NA	2	11.04	0	NA	NA	NA	NA	1.327e-08	rs34711187	4
ENSG00000047849	MAP4	3	47892182	48130769	-1	protein_coding	4134	MAP4	0.998849	-0.836309	4	26	8	1.7318e-21	0	eQTLGen_cis_eQTLs:GTEx/v8/Whole_Blood	+	1.327e-08	rs34711187	4
ENSG00000164045	CDC25A	3	48198636	48229892	-1	protein_coding	993	CDC25A	0.979698	-0.724001	0	0	1	0.000731188	1.6423e-73	GTEx/v8/Muscle_Skeletal	NA	NA	rs34711187	4
ENSG00000164048	ZNF589	3	48282590	48340743	1	protein_coding	51385	ZNF589	6.50061e-07	-0.372176	0	0	5	1.015e-34	0	eQTLGen_cis_eQTLs:GTEx/v8/Whole_Blood	-	1.327e-08	rs34711187	4
ENSG00000172113	NME6	3	48334754	48343175	-1	protein_coding	10201	NME6	9.21636e-05	-0.182941	0	0	1	6.8985e-07	0.00213367767324602	eQTLGen_cis_eQTLs	+	1.327e-08	rs34711187	4
ENSG00000229453	SPINK8	3	48348336	48369831	-1	protein_coding	646424	SPINK8	0.00112129	-0.205479	0	0	1	2.3148e-06	0.00676700855738302	eQTLGen_cis_eQTLs	-	1.327e-08	rs34711187	4
ENSG00000178467	P4HTM	3	49027319	49044587	1	protein_coding	54681	P4HTM	0.0232749	NA	0	0	1	1.8184e-07	0.000611964531035344	eQTLGen_cis_eQTLs	+	3.993e-05	rs34711187	4
ENSG00000178252	WDR6	3	49044495	49053386	1	protein_coding	11180	WDR6	9.19648e-07	-0.0589495	0	0	1	7.2134e-26	0	eQTLGen_cis_eQTLs	-	3.993e-05	rs34711187	4
ENSG00000152977	ZIC1	3	147111209	147228080	1	protein_coding	7545	ZIC1	0.825224	-1.66416	1	12.06	0	NA	NA	NA	NA	NA	rs536126574	5
ENSG00000153002	CPB1	3	148508889	148577974	1	protein_coding	1360	CPB1	2.26972e-14	0.0290356	1	1.218	0	NA	NA	NA	NA	NA	rs536126574	5
ENSG00000163751	CPA3	3	148583043	148614983	1	protein_coding	1359	CPA3	1.28343e-12	0.0249414	1	1.218	0	NA	NA	NA	NA	NA	rs536126574	5
ENSG00000250588	IQCJ-SCHIP1	3	158680024	159615155	1	protein_coding	100505385	IQCJ-SCHIP1	0.660502	0.0463226	22	11.69	0	NA	NA	NA	NA	4.196e-09	rs73020386	6
ENSG00000214216	IQCJ	3	158680717	158984096	1	protein_coding	654502	IQCJ	0.0984294	0.277911	1	3.89	0	NA	NA	NA	NA	NA	rs73020386	6
ENSG00000145439	CBR4	4	169784921	169931426	-1	protein_coding	84869	CBR4	8.22222e-06	-0.354384	0	0	31	5.3199e-07	0.00172031076581576	eQTLGen_cis_eQTLs	+	1.678e-08	rs6831487	8
ENSG00000154447	SH3RF1	4	170015407	170192256	-1	protein_coding	57630	SH3RF1	0.0463955	-0.163773	0	0	67	9.9299e-141	0	eQTLGen_cis_eQTLs:GTEx/v8/Whole_Blood:GTEx/v8/Brain_Spinal_cord_cervical_c-1:GTEx/v8/Muscle_Skeletal	+	1.678e-08	rs6831487	8
ENSG00000137601	NEK1	4	170314426	170533780	-1	protein_coding	4750	NEK1	4.21851e-12	-0.433231	48	12.22	63	3.8728e-121	0	eQTLGen_cis_eQTLs:GTEx/v8/Muscle_Skeletal	+	1.678e-08	rs6831487	8
ENSG00000109572	CLCN3	4	170533784	170644824	1	protein_coding	1182	CLCN3	0.993265	-0.84734	12	9.41	63	4.5343e-15	0	eQTLGen_cis_eQTLs:GTEx/v8/Muscle_Skeletal	-	1.678e-08	rs6831487	8
ENSG00000056050	C4orf27	4	170650616	170679104	-1	protein_coding	54969	C4orf27	0.000423307	-0.492058	0	0	6	9.1635e-07	0.00289322054676965	eQTLGen_cis_eQTLs	+	0.0001905	rs6831487	8
ENSG00000172869	DMXL1	5	118373467	118584833	1	protein_coding	1657	DMXL1	0.999999	-0.280706	2	1.735	0	NA	NA	NA	NA	NA	rs192759317	9
ENSG00000145779	TNFAIP8	5	118604387	118735383	1	protein_coding	25816	TNFAIP8	0.239737	1.2161	1	0.39	0	NA	NA	NA	NA	NA	rs192759317	9
ENSG00000133835	HSD17B4	5	118788138	118972894	1	protein_coding	3295	HSD17B4	1.82463e-05	-0.16773	1	5.947	0	NA	NA	NA	NA	NA	rs192759317	9
ENSG00000184838	PRR16	5	119799973	120023027	1	protein_coding	51334	PRR16	0.526199	-0.167736	2	3.092	0	NA	NA	NA	NA	NA	rs181900403	9
ENSG00000211445	GPX3	5	150400124	150408554	1	protein_coding	2878	GPX3	0.0155826	0.488879	22	8.065	17	1.603e-68	0	eQTLGen_cis_eQTLs	+	4.042e-10	rs10463311;rs11747926	10
ENSG00000145901	TNIP1	5	150409506	150473138	-1	protein_coding	10318	TNIP1	0.929689	0.37663	25	8.065	25	1.5873e-49	0	eQTLGen_cis_eQTLs:GTEx/v8/Whole_Blood:GTEx/v8/Brain_Cerebellar_Hemisphere	-	4.042e-10	rs10463311;rs11747926	10
ENSG00000113719	ERGIC1	5	172261278	172379688	1	protein_coding	57222	ERGIC1	0.714837	-0.270665	22	16.78	1	3.4258e-11	0	eQTLGen_cis_eQTLs	NA	4.935e-08	rs517339	11
ENSG00000164463	CREBRF	5	172483355	172566291	1	protein_coding	153222	CREBRF	0.998406	-2.591	0	0	14	4.859e-07	0.00157397691500525	eQTLGen_cis_eQTLs	+	4.935e-08	rs517339	11
ENSG00000113734	BNIP1	5	172571445	172591390	1	protein_coding	662	BNIP1	0.00143693	-0.218655	0	0	6	5.7988e-07	0.00189039408866995	eQTLGen_cis_eQTLs	+	5.073e-08	rs517339	11
ENSG00000113300	CNOT6	5	179921412	180005405	1	protein_coding	57472	CNOT6	0.478458	-0.0894081	1	0.42	0	NA	NA	NA	NA	4.277e-08	rs183247446	12
ENSG00000137337	MDC1	6	30667584	30685666	-1	protein_coding	9656	MDC1	0.000941847	1.23198	0	0	1	0.000112698	0.00669351	GTEx/v8/Brain_Cerebellum	-	1.294e-05	rs2077492	13
ENSG00000137312	FLOT1	6	30695486	30710510	-1	protein_coding	10211	FLOT1	0.0152734	NA	0	0	13	2.1984e-10	0	eQTLGen_cis_eQTLs	-	4.076e-08	rs2077492	13
ENSG00000137331	IER3	6	30710976	30712331	-1	protein_coding	8870	IER3	0.671462	0.0243271	0	0	13	7.0121e-13	0	eQTLGen_cis_eQTLs	-	4.076e-08	rs2077492	13
ENSG00000204580	DDR1	6	30844198	30867933	1	protein_coding	100616237	DDR1	0.0264779	0.516702	0	0	14	8.0739e-37	0	eQTLGen_cis_eQTLs	+	4.076e-08	rs2077492	13
ENSG00000137411	VARS2	6	30876019	30894236	1	protein_coding	57176	VARS2	4.2195e-14	NA	0	0	15	2.3144e-61	0	eQTLGen_cis_eQTLs:GTEx/v8/Whole_Blood	+	4.076e-08	rs2077492	13
ENSG00000204536	CCHCR1	6	31110216	31126015	-1	protein_coding	54535	CCHCR1	6.50104e-08	NA	0	0	11	1.1171e-06	0.00338205614335515	eQTLGen_cis_eQTLs	-	4.991e-08	rs2077492	13
ENSG00000137310	TCF19	6	31126319	31134936	1	protein_coding	6941	TCF19	0.000232744	2.24538	0	0	12	2.7039e-07	0.000900900900900901	eQTLGen_cis_eQTLs	+	4.076e-08	rs2077492	13
ENSG00000204531	POU5F1	6	31132119	31148508	-1	protein_coding	5460	POU5F1	0.889691	0.511715	0	0	7	2.6954e-13	0	eQTLGen_cis_eQTLs	+	8.018e-06	rs2077492	13
ENSG00000206344	HCG27	6	31165537	31171745	1	protein_coding	253018	HCG27	NA	NA	0	0	12	5.264e-14	0	eQTLGen_cis_eQTLs	+	4.076e-08	rs2077492	13
ENSG00000204525	HLA-C	6	31236526	31239907	-1	protein_coding	3107	HLA-C	9.94564e-10	8.44189	0	0	15	1.1994e-244	0	eQTLGen_cis_eQTLs:GTEx/v8/Brain_Cerebellar_Hemisphere:GTEx/v8/Brain_Cerebellum:GTEx/v8/Brain_Hypothalamus:GTEx/v8/Brain_Spinal_cord_cervical_c-1:GTEx/v8/Muscle_Skeletal	-	4.076e-08	rs2077492	13
ENSG00000234745	HLA-B	6	31321649	31324965	-1	protein_coding	3106	HLA-B	0.00266463	10.6253	0	0	7	3.9612e-55	0	eQTLGen_cis_eQTLs	-	4.076e-08	rs2077492	13
ENSG00000204520	MICA	6	31371356	31383092	1	protein_coding	100507436	MICA	0.00037802	2.27712	0	0	13	1.1612e-20	0	eQTLGen_cis_eQTLs:GTEx/v8/Muscle_Skeletal	-	4.076e-08	rs2077492	13
ENSG00000204516	MICB	6	31462658	31478901	1	protein_coding	4277	MICB	0.000284377	0.724392	0	0	13	2.0872e-07	2.62591e-46	eQTLGen_cis_eQTLs:GTEx/v8/Brain_Cerebellar_Hemisphere:GTEx/v8/Brain_Cerebellum:GTEx/v8/Muscle_Skeletal	-	2.555e-06	rs2516006;rs2077492	13:14:00
ENSG00000198563	DDX39B	6	31497996	31510225	-1	protein_coding	692199	DDX39B	0.997728	0.551698	0	0	1	8.7565e-06	0.0247719005307412	eQTLGen_cis_eQTLs	-	1.294e-05	rs2077492	13
ENSG00000213760	ATP6V1G2	6	31512239	31516204	-1	protein_coding	534	ATP6V1G2	0.22479	0.5586	0	0	15	6.2188e-28	0	eQTLGen_cis_eQTLs:GTEx/v8/Whole_Blood	+	4.076e-08	rs2077492	13
ENSG00000226979	LTA	6	31539831	31542101	1	protein_coding	4049	LTA	0.743247	0.0526	0	0	13	2.0334e-10	0	eQTLGen_cis_eQTLs	-	4.076e-08	rs2077492	13
ENSG00000232810	TNF	6	31543344	31546113	1	protein_coding	7124	TNF	0.272829	-0.462056	0	0	1	3.0075e-08	0.000133562297271513	eQTLGen_cis_eQTLs	-	1.294e-05	rs2077492	13
ENSG00000204482	LST1	6	31553901	31556686	1	protein_coding	7940	LST1	0.00253791	0.289221	0	0	15	1.3002e-20	0	eQTLGen_cis_eQTLs:GTEx/v8/Whole_Blood	-	4.076e-08	rs2077492	13
ENSG00000204475	NCR3	6	31556672	31560762	-1	protein_coding	259197	NCR3	0.00146131	0.872155	0	0	13	4.017e-20	0	eQTLGen_cis_eQTLs	-	4.076e-08	rs2077492	13
ENSG00000204472	AIF1	6	31582961	31584798	1	protein_coding	199	AIF1	0.0127986	-0.264551	9	15.64	15	8.294e-80	0	eQTLGen_cis_eQTLs:GTEx/v8/Whole_Blood	+	4.076e-08	rs2077492	13
ENSG00000204469	PRRC2A	6	31588497	31605548	1	protein_coding	7916	PRRC2A	1	NA	16	18.52	16	9.2031e-32	0	eQTLGen_cis_eQTLs:GTEx/v8/Whole_Blood:GTEx/v8/Muscle_Skeletal	+	4.076e-08	rs2077492;rs9275477	13:14:00
ENSG00000204463	BAG6	6	31606805	31620482	-1	protein_coding	7917	BAG6	0.999988	-0.32119	7	18.52	14	7.92249e-14	0	eQTLGen_cis_eQTLs:GTEx/v8/Whole_Blood:GTEx/v8/Brain_Amygdala:GTEx/v8/Brain_Anterior_cingulate_cortex_BA24:GTEx/v8/Brain_Caudate_basal_ganglia:GTEx/v8/Brain_Cerebellar_Hemisphere:GTEx/v8/Brain_Cerebellum:GTEx/v8/Brain_Cortex:GTEx/v8/Brain_Frontal_Cortex_BA9:GTEx/v8/Brain_Hippocampus:GTEx/v8/Brain_Hypothalamus:GTEx/v8/Brain_Putamen_basal_ganglia:GTEx/v8/Muscle_Skeletal	+	4.076e-08	rs2077492	13
ENSG00000204444	APOM	6	31620193	31625987	1	protein_coding	55937	APOM	0.00854308	-0.533737	2	18.52	14	4.12389e-06	8.41362e-12	GTEx/v8/Muscle_Skeletal	+	4.076e-08	rs2077492	13
ENSG00000204439	C6orf47	6	31626075	31628549	-1	protein_coding	57827	C6orf47	0.169848	-0.557276	0	0	1	5.9151e-06	0.0168834282289482	eQTLGen_cis_eQTLs	-	1.294e-05	rs2077492	13
ENSG00000204438	GPANK1	6	31629006	31634060	-1	protein_coding	7918	GPANK1	0.000931901	0.994021	0	0	15	5.56565e-15	6.03308e-23	eQTLGen_cis_eQTLs:GTEx/v8/Muscle_Skeletal	-	4.076e-08	rs2077492	13
ENSG00000204435	CSNK2B	6	31633013	31638120	1	protein_coding	1460	CSNK2B	0.943857	0.192574	0	0	15	1.4561e-19	0	eQTLGen_cis_eQTLs:GTEx/v8/Whole_Blood:GTEx/v8/Brain_Nucleus_accumbens_basal_ganglia:GTEx/v8/Muscle_Skeletal	-	4.076e-08	rs2077492	13
ENSG00000240053	LY6G5B	6	31637944	31641553	1	protein_coding	58496	LY6G5B	0.000871194	0.370528	0	0	19	3.6388e-42	0	eQTLGen_cis_eQTLs:GTEx/v8/Whole_Blood:GTEx/v8/Muscle_Skeletal	+	4.076e-08	rs2077492;rs2516006;rs9275477	13:14:00
ENSG00000204428	LY6G5C	6	31644461	31651817	-1	protein_coding	80741	LY6G5C	0.61467	0.183113	0	0	40	3.1867e-177	0	eQTLGen_cis_eQTLs:GTEx/v8/Whole_Blood:GTEx/v8/Brain_Amygdala:GTEx/v8/Brain_Anterior_cingulate_cortex_BA24:GTEx/v8/Brain_Caudate_basal_ganglia:GTEx/v8/Brain_Cerebellar_Hemisphere:GTEx/v8/Brain_Cerebellum:GTEx/v8/Brain_Cortex:GTEx/v8/Brain_Frontal_Cortex_BA9:GTEx/v8/Brain_Hippocampus:GTEx/v8/Brain_Hypothalamus:GTEx/v8/Brain_Nucleus_accumbens_basal_ganglia:GTEx/v8/Brain_Putamen_basal_ganglia:GTEx/v8…	+	4.076e-08	rs2077492;rs2516006	13:14:00
ENSG00000204420	C6orf25	6	31686371	31694491	1	protein_coding	80739	C6orf25	0.00403769	-0.298211	0	0	14	5.01661e-05	2.19714e-05	GTEx/v8/Brain_Caudate_basal_ganglia	-	4.076e-08	rs2077492	13
ENSG00000213722	DDAH2	6	31694815	31698394	-1	protein_coding	23564	DDAH2	0.842139	-0.370986	0	0	16	2.24597e-09	4.4085e-11	eQTLGen_cis_eQTLs:GTEx/v8/Muscle_Skeletal	+	4.076e-08	rs2516006;rs2077492	13:14:00
ENSG00000213719	CLIC1	6	31698358	31707540	-1	protein_coding	1192	CLIC1	0.0124562	0.517818	0	0	7	4.9807e-06	0.0144136024993992	eQTLGen_cis_eQTLs	+	8.018e-06	rs2077492	13
ENSG00000204410	MSH5	6	31707725	31732622	1	protein_coding	4439	MSH5	6.1388e-08	-0.0743933	0	0	9	8.3038e-08	0.000327249842668345	eQTLGen_cis_eQTLs	+	8.018e-06	rs2077492	13
ENSG00000204396	VWA7	6	31733367	31745108	-1	protein_coding	80737	VWA7	4.28881e-07	-0.117039	0	0	37	9.8637e-10	7.56145e-23	eQTLGen_cis_eQTLs:GTEx/v8/Muscle_Skeletal	-	1.855e-11	rs2077492;rs9275477;rs2516006	13:14:00
ENSG00000204390	HSPA1L	6	31777396	31783437	-1	protein_coding	3305	HSPA1L	2.19041e-06	-0.11285	0	0	8	8.0531e-12	0	eQTLGen_cis_eQTLs	+	8.018e-06	rs2077492	13
ENSG00000204388	HSPA1B	6	31795512	31798031	1	protein_coding	3304	HSPA1B	NA	0.733333	0	0	14	1.6504e-24	0	eQTLGen_cis_eQTLs	+	4.076e-08	rs2077492	13
ENSG00000204387	C6orf48	6	31802385	31807541	1	protein_coding	50854	C6orf48	5.82447e-05	-0.0706833	0	0	14	8.6156e-36	0	eQTLGen_cis_eQTLs	+	4.076e-08	rs2077492	13
ENSG00000204386	NEU1	6	31825436	31830683	-1	protein_coding	4758	NEU1	1.93154e-05	-0.509633	0	0	7	1.1285e-06	0.00341242661448141	eQTLGen_cis_eQTLs	+	8.018e-06	rs2077492	13
ENSG00000204371	EHMT2	6	31847536	31865464	-1	protein_coding	10919	EHMT2	0.0644715	-0.142114	0	0	14	1.2584e-12	0	eQTLGen_cis_eQTLs	-	4.076e-08	rs2077492	13
ENSG00000204366	ZBTB12	6	31867384	31869769	-1	protein_coding	221527	ZBTB12	0.807401	NA	0	0	7	6.61863e-05	8.85936e-52	GTEx/v8/Whole_Blood	+	8.018e-06	rs2077492	13
ENSG00000204356	NELFE	6	31919864	31926887	-1	protein_coding	100302242	NELFE	0.756273	-0.0686102	0	0	8	4.8912e-06	2.18466e-05	eQTLGen_cis_eQTLs:GTEx/v8/Whole_Blood	+	8.018e-06	rs2077492	13
ENSG00000204351	SKIV2L	6	31926857	31937532	1	protein_coding	6499	SKIV2L	1.11012e-15	-0.360101	0	0	67	3.7982e-35	0	eQTLGen_cis_eQTLs	-	7.151e-09	rs2077492;rs2516006	13:14:00
ENSG00000244731	C4A	6	31949801	31970458	1	protein_coding	721	C4A	NA	-0.318572	0	0	13	7.6386e-54	0	eQTLGen_cis_eQTLs:GTEx/v8/Whole_Blood:GTEx/v8/Brain_Caudate_basal_ganglia:GTEx/v8/Brain_Cortex	+	4.991e-08	rs2077492;rs9275477	13:14:00
ENSG00000224389	C4B	6	31982539	32003195	1	protein_coding	100293534	C4B	NA	-0.318572	0	0	13	1.8656e-54	0	eQTLGen_cis_eQTLs	-	4.076e-08	rs2077492	13
ENSG00000231852	CYP21A2	6	32006042	32009447	1	protein_coding	1589	CYP21A2	0.672307	0.394527	0	0	74	2.7153e-34	0	eQTLGen_cis_eQTLs:GTEx/v8/Brain_Cerebellum:GTEx/v8/Brain_Cortex	+	7.498e-12	rs2077492;rs9275477;rs2516006	13:14:00
ENSG00000168477	TNXB	6	32008931	32083111	-1	protein_coding	7148	TNXB	0.774154	-0.827101	0	0	24	9.9104e-33	0	eQTLGen_cis_eQTLs	+	4.076e-08	rs2077492;rs2516006;rs9275477	13:14:00
ENSG00000213676	ATF6B	6	32065953	32096030	-1	protein_coding	1388	ATF6B	1.67701e-06	0.204046	0	0	22	3.981e-22	0	eQTLGen_cis_eQTLs:GTEx/v8/Brain_Nucleus_accumbens_basal_ganglia:GTEx/v8/Brain_Spinal_cord_cervical_c-1:GTEx/v8/Muscle_Skeletal	+	4.076e-08	rs2077492;rs9275477	13:14:00
ENSG00000204315	FKBPL	6	32096484	32098068	-1	protein_coding	63943	FKBPL	5.35499e-05	0.348686	0	0	27	4.603e-08	0.000177361119908786	eQTLGen_cis_eQTLs	-	7.151e-09	rs2516006	14
ENSG00000204314	PRRT1	6	32116136	32122150	-1	protein_coding	100507547	PRRT1	0.407946	-0.838939	0	0	2	1.1792e-05	0.0331316725978648	eQTLGen_cis_eQTLs	-	4.991e-08	rs2077492	13
ENSG00000221988	PPT2	6	32121218	32134011	1	protein_coding	80864	PPT2	0.772683	-0.617997	0	0	6	1.7288e-15	0	eQTLGen_cis_eQTLs	-	4.076e-08	rs2077492	13
ENSG00000204308	RNF5	6	32146131	32151930	1	protein_coding	6048	RNF5	0.00299042	0.00681417	0	0	12	8.0684e-14	0	eQTLGen_cis_eQTLs:GTEx/v8/Muscle_Skeletal	+	4.076e-08	rs2077492;rs9275477	13:14:00
ENSG00000204305	AGER	6	32148745	32152101	-1	protein_coding	177	AGER	1.46448e-10	-0.301869	0	0	1	3.243e-09	2.59723394584767e-05	eQTLGen_cis_eQTLs	+	1.294e-05	rs2077492	13
ENSG00000204304	PBX2	6	32152512	32157963	-1	protein_coding	5089	PBX2	0.889707	-0.473698	0	0	56	7.3391e-10	1.30642105950748e-05	eQTLGen_cis_eQTLs	-	1.855e-11	rs2077492;rs9275477	13:14:00
ENSG00000204301	NOTCH4	6	32162620	32191844	-1	protein_coding	4855	NOTCH4	1.19532e-10	0.0113186	0	0	6	3.4077e-18	0	eQTLGen_cis_eQTLs:GTEx/v8/Muscle_Skeletal	-	4.076e-08	rs2077492	13
ENSG00000204287	HLA-DRA	6	32407619	32412823	1	protein_coding	3122	HLA-DRA	0.700165	2.60729	0	0	71	6.5071e-11	0	eQTLGen_cis_eQTLs:GTEx/v8/Muscle_Skeletal	+	7.498e-12	rs2516006;rs9275477	14
ENSG00000198502	HLA-DRB5	6	32485120	32498064	-1	protein_coding	3127	HLA-DRB5	0.00322727	NA	0	0	165	3.27170000000001e-310	0	eQTLGen_cis_eQTLs:GTEx/v8/Muscle_Skeletal	+	7.498e-12	rs2077492;rs2516006;rs9275477	13:14:00
ENSG00000196126	HLA-DRB1	6	32546546	32557625	-1	protein_coding	100996809	HLA-DRB1	5.62353e-05	10.1544	6	21.5	163	3.0427e-245	0	eQTLGen_cis_eQTLs:GTEx/v8/Whole_Blood:GTEx/v8/Brain_Amygdala:GTEx/v8/Brain_Anterior_cingulate_cortex_BA24:GTEx/v8/Brain_Caudate_basal_ganglia:GTEx/v8/Brain_Cerebellar_Hemisphere:GTEx/v8/Brain_Cerebellum:GTEx/v8/Brain_Cortex:GTEx/v8/Brain_Frontal_Cortex_BA9:GTEx/v8/Brain_Hippocampus:GTEx/v8/Brain_Hypothalamus:GTEx/v8/Brain_Nucleus_accumbens_basal_ganglia:GTEx/v8/Brain_Putamen_basal_ganglia:GTEx/v8…	+	7.498e-12	rs9275477;rs2077492;rs2516006	13:14:00
ENSG00000196735	HLA-DQA1	6	32595956	32614839	1	protein_coding	100509457	HLA-DQA1	0.166625	NA	2	11.89	161	3.27170000000001e-310	0	eQTLGen_cis_eQTLs:GTEx/v8/Whole_Blood:GTEx/v8/Brain_Cerebellar_Hemisphere:GTEx/v8/Brain_Hippocampus:GTEx/v8/Brain_Spinal_cord_cervical_c-1:GTEx/v8/Muscle_Skeletal	+	7.498e-12	rs9275477;rs2077492;rs2516006	13:14:00
ENSG00000179344	HLA-DQB1	6	32627244	32636160	-1	protein_coding	101060835	HLA-DQB1	0.353015	22.5355	59	12.7	164	3.4463e-254	0	eQTLGen_cis_eQTLs:GTEx/v8/Whole_Blood:GTEx/v8/Brain_Amygdala:GTEx/v8/Brain_Anterior_cingulate_cortex_BA24:GTEx/v8/Brain_Caudate_basal_ganglia:GTEx/v8/Brain_Cerebellar_Hemisphere:GTEx/v8/Brain_Cerebellum:GTEx/v8/Brain_Cortex:GTEx/v8/Brain_Frontal_Cortex_BA9:GTEx/v8/Brain_Hippocampus:GTEx/v8/Brain_Hypothalamus:GTEx/v8/Brain_Nucleus_accumbens_basal_ganglia:GTEx/v8/Brain_Putamen_basal_ganglia:GTEx/v8…	+	7.498e-12	rs9275477;rs2516006	14
ENSG00000237541	HLA-DQA2	6	32709119	32714992	1	protein_coding	3118	HLA-DQA2	0.00504406	3.37251	0	0	152	3.27170000000001e-310	0	eQTLGen_cis_eQTLs:GTEx/v8/Whole_Blood:GTEx/v8/Brain_Amygdala:GTEx/v8/Brain_Anterior_cingulate_cortex_BA24:GTEx/v8/Brain_Caudate_basal_ganglia:GTEx/v8/Brain_Cerebellar_Hemisphere:GTEx/v8/Brain_Cerebellum:GTEx/v8/Brain_Cortex:GTEx/v8/Brain_Frontal_Cortex_BA9:GTEx/v8/Brain_Hippocampus:GTEx/v8/Brain_Hypothalamus:GTEx/v8/Brain_Nucleus_accumbens_basal_ganglia:GTEx/v8/Brain_Putamen_basal_ganglia:GTEx/v8…	-	7.498e-12	rs2516006;rs9275477	14
ENSG00000232629	HLA-DQB2	6	32723875	32731311	-1	protein_coding	3120	HLA-DQB2	0.00935593	2.05644	0	0	148	9.6865e-174	0	eQTLGen_cis_eQTLs:GTEx/v8/Whole_Blood:GTEx/v8/Brain_Caudate_basal_ganglia:GTEx/v8/Brain_Cerebellar_Hemisphere:GTEx/v8/Brain_Cerebellum:GTEx/v8/Brain_Cortex:GTEx/v8/Brain_Hippocampus:GTEx/v8/Brain_Hypothalamus:GTEx/v8/Brain_Nucleus_accumbens_basal_ganglia:GTEx/v8/Brain_Spinal_cord_cervical_c-1:GTEx/v8/Muscle_Skeletal	-	7.498e-12	rs2516006;rs9275477	14
ENSG00000241106	HLA-DOB	6	32780540	32784825	-1	protein_coding	3112	HLA-DOB	9.08752e-05	1.30943	0	0	117	2.704e-31	0	eQTLGen_cis_eQTLs:GTEx/v8/Whole_Blood:GTEx/v8/Brain_Cerebellum:GTEx/v8/Muscle_Skeletal	-	7.498e-12	rs2516006;rs9275477	14
ENSG00000204267	TAP2	6	32789610	32806557	-1	protein_coding	6891	TAP2	0.00171342	1.68723	0	0	124	8.6938e-68	0	eQTLGen_cis_eQTLs:GTEx/v8/Whole_Blood	+	7.498e-12	rs9275477;rs2516006	14
ENSG00000204264	PSMB8	6	32808494	32812480	-1	protein_coding	5696	PSMB8	0.0120032	-0.438663	0	0	38	2.532e-13	0	eQTLGen_cis_eQTLs	+	1.855e-11	rs9275477	14
ENSG00000240065	PSMB9	6	32811913	32827362	1	protein_coding	5698	PSMB9	0.225647	0.235564	0	0	98	5.0846e-15	0	eQTLGen_cis_eQTLs	+	7.498e-12	rs9275477;rs2516006	14
ENSG00000204252	HLA-DOA	6	32971955	32977389	-1	protein_coding	3111	HLA-DOA	1.88487e-05	3.6107	0	0	53	6.8823e-11	0	eQTLGen_cis_eQTLs	+	7.498e-12	rs9275477	14
ENSG00000178445	GLDC	9	6532464	6645650	-1	protein_coding	2731	GLDC	4.87945e-14	0.293403	2	5.049	0	NA	NA	NA	NA	NA	rs527769781	15
ENSG00000107077	KDM4C	9	6720863	7175648	1	protein_coding	23081	KDM4C	0.000758735	-0.55373	3	6.026	0	NA	NA	NA	NA	NA	rs527769781	15
ENSG00000153707	PTPRD	9	8314246	10612723	-1	protein_coding	5789	PTPRD	1	-0.573834	5	13.12	0	NA	NA	NA	NA	NA	rs527769781	15
ENSG00000120159	CAAP1	9	26840683	26892802	-1	protein_coding	79886	CAAP1	0.708932	-0.482712	2	4.282	0	NA	NA	NA	NA	NA	rs186882747	16
ENSG00000137055	PLAA	9	26904081	26947461	-1	protein_coding	9373	PLAA	0.648657	-0.44167	1	5.496	0	NA	NA	NA	NA	NA	rs187064754	16
ENSG00000096872	IFT74	9	26947037	27062928	1	protein_coding	80173	IFT74	9.26889e-06	-0.450404	7	11.71	0	NA	NA	NA	NA	NA	rs187064754;rs186882747	16
ENSG00000184434	LRRC19	9	26993134	27005691	-1	protein_coding	64922	LRRC19	5.16703e-05	0.0382254	2	11.71	0	NA	NA	NA	NA	NA	rs187064754	16
ENSG00000120156	TEK	9	27109139	27230173	1	protein_coding	7010	TEK	0.999993	0.253704	2	1.026	1	2.1987e-09	1.95579894386857e-05	eQTLGen_cis_eQTLs	-	4.835e-16	rs186882747;rs41272855	16
ENSG00000120160	EQTN	9	27284656	27297137	-1	protein_coding	54586	EQTN	1.3335e-07	0.656959	2	2.352	0	NA	NA	NA	NA	3.489e-12	rs186882747	16
ENSG00000120162	MOB3B	9	27325207	27529779	-1	protein_coding	79817	MOB3B	0.0303778	1.34091	117	18.5	26	1.59579e-14	4.77152e-35	eQTLGen_cis_eQTLs:GTEx/v8/Brain_Cerebellar_Hemisphere:GTEx/v8/Brain_Cerebellum	-	3.46e-48	rs553196048;rs112815441;rs187064754;rs576830492;rs148703839;rs10511816;rs7873548;rs12552327;rs4879515;rs4879524;rs3849937;rs2453555;rs10812605;rs139185008;rs700786;rs2492816;rs3736321;rs7030008;rs7029905;rs7868845;rs773720;rs36062268;rs2120721	16
ENSG00000147896	IFNK	9	27524312	27526496	1	protein_coding	56832	IFNK	9.61085e-09	1.73772	39	18.5	0	NA	NA	NA	NA	1.074e-45	rs2453555;rs10812605;rs3849937;rs4879524;rs700786;rs2492816;rs3736321	16
ENSG00000147894	C9orf72	9	27546544	27573864	-1	protein_coding	203228	C9orf72	0.000715132	0.264616	84	14.12	190	3.27170000000001e-310	0	eQTLGen_cis_eQTLs:GTEx/v8/Whole_Blood:GTEx/v8/Brain_Amygdala:GTEx/v8/Brain_Anterior_cingulate_cortex_BA24:GTEx/v8/Brain_Caudate_basal_ganglia:GTEx/v8/Brain_Cerebellar_Hemisphere:GTEx/v8/Brain_Cerebellum:GTEx/v8/Brain_Cortex:GTEx/v8/Brain_Frontal_Cortex_BA9:GTEx/v8/Brain_Hippocampus:GTEx/v8/Brain_Hypothalamus:GTEx/v8/Brain_Nucleus_accumbens_basal_ganglia:GTEx/v8/Brain_Putamen_basal_ganglia:GTEx/v8…	+	3.46e-48	rs7030008;rs2453555;rs2492816;rs7029905;rs10812605;rs3849937;rs3736321;rs4879554;rs2120721;rs10967994;rs188460764;rs17696570;rs773720;rs7864502;rs7868845;rs112815441;rs148703839;rs10511816;rs7873548;rs12552327;rs4879515;rs4879524;rs139185008;rs700786;rs36062268	16
ENSG00000174482	LINGO2	9	27948076	28670283	-1	protein_coding	158038	LINGO2	0.807167	-0.935732	13	8.842	0	NA	NA	NA	NA	6.244e-23	rs187891534;rs190723663;rs148500116;rs186882747;rs187064754;rs188413503	16
ENSG00000136883	KIF12	9	116848406	116861507	-1	protein_coding	113220	KIF12	1.78101e-05	-0.602357	1	1.823	0	NA	NA	NA	NA	6.837e-10	rs145112002	17
ENSG00000196739	COL27A1	9	116917840	117074791	1	protein_coding	85301	COL27A1	0.999999	0.703305	1	7.427	0	NA	NA	NA	NA	NA	rs145112002	17
ENSG00000244242	IFITM10	11	1753640	1771821	-1	protein_coding	402778	IFITM10	NA	0.356777	2	4.903	0	NA	NA	NA	NA	3.017e-09	rs374866773	18
ENSG00000250644	RP11-295K3.1	11	1768897	1780281	-1	protein_coding	NA	NA	NA	NA	2	4.903	0	NA	NA	NA	NA	3.017e-09	rs374866773	18
ENSG00000117984	CTSD	11	1773982	1785222	-1	protein_coding	1509	CTSD	0.0891859	NA	2	4.903	0	NA	NA	NA	NA	3.017e-09	rs374866773	18
ENSG00000130592	LSP1	11	1874200	1913497	1	protein_coding	4046	LSP1	0.259642	0.263367	1	5.057	0	NA	NA	NA	NA	NA	rs374866773	18
ENSG00000184682	C11orf89	11	1910375	1912084	-1	protein_coding	NA	C11orf89	NA	NA	1	5.057	0	NA	NA	NA	NA	NA	rs374866773	18
ENSG00000167244	IGF2	11	2150342	2170833	-1	protein_coding	3481	IGF2	0.0253027	-0.790873	1	0.738	0	NA	NA	NA	NA	NA	rs374866773	18
ENSG00000053918	KCNQ1	11	2465914	2870339	1	protein_coding	3784	KCNQ1	2.45299e-05	1.15324	2	2.383	0	NA	NA	NA	NA	NA	rs374866773	18
ENSG00000166888	STAT6	12	57489191	57525922	-1	protein_coding	6778	STAT6	0.100775	0.0810364	0	0	5	3.061e-20	0	eQTLGen_cis_eQTLs	+	3.863e-12	rs113247976;rs111263678	19
ENSG00000166986	MARS	12	57869228	57911352	1	protein_coding	102465454	MARS	2.73685e-12	-0.447643	0	0	5	3.7092e-10	0	eQTLGen_cis_eQTLs:GTEx/v8/Brain_Cortex	+	3.863e-12	rs113247976;rs111263678	19
ENSG00000175197	DDIT3	12	57910371	57914300	-1	protein_coding	1649	DDIT3	0.515502	-0.342173	0	0	4	1.4042e-09	1.30907186804556e-05	eQTLGen_cis_eQTLs	+	3.863e-12	rs113247976;rs111263678	19
ENSG00000175203	DCTN2	12	57923885	57941114	-1	protein_coding	10540	DCTN2	0.996367	-0.603791	0	0	2	2.42104e-05	3.28953e-23	GTEx/v8/Muscle_Skeletal	+	1.152e-09	rs111263678	19
ENSG00000155980	KIF5A	12	57943781	57980415	1	protein_coding	3798	KIF5A	0.99998	-0.906161	1	18.2	0	NA	NA	NA	NA	3.863e-12	rs113247976	19
ENSG00000166908	PIP4K2C	12	57984957	57997198	1	protein_coding	79837	PIP4K2C	0.0133787	-0.691827	1	18.2	0	NA	NA	NA	NA	3.863e-12	rs113247976	19
ENSG00000135439	AGAP2	12	58118980	58135940	-1	protein_coding	116986	AGAP2	0.999219	NA	1	1.269	0	NA	NA	NA	NA	1.152e-09	rs111263678	19
ENSG00000135452	TSPAN31	12	58131796	58143994	1	protein_coding	6302	TSPAN31	0.327259	0.149905	1	1.269	0	NA	NA	NA	NA	1.152e-09	rs111263678	19
ENSG00000135446	CDK4	12	58141510	58149796	-1	protein_coding	1019	CDK4	0.932017	-0.277374	1	1.269	0	NA	NA	NA	NA	1.152e-09	rs111263678	19
ENSG00000139266	2025-03-09	12	58148881	58154190	1	protein_coding	92979	2025-03-09	0.35028	-0.4225	1	1.269	0	NA	NA	NA	NA	1.152e-09	rs111263678	19
ENSG00000123427	METTL21B	12	58165275	58176324	1	protein_coding	25895	METTL21B	0.00509294	-0.79524	0	0	6	9.3567e-47	0	eQTLGen_cis_eQTLs	-	3.863e-12	rs113247976;rs111263678;rs116900480	19
ENSG00000135407	AVIL	12	58191159	58212487	-1	protein_coding	10677	AVIL	1.03036e-10	-0.149242	0	0	3	2.1809e-08	0.000108459869848156	eQTLGen_cis_eQTLs	-	3.096e-07	rs111263678	19
ENSG00000166896	XRCC6BP1	12	58335324	58351052	1	protein_coding	91419	XRCC6BP1	0.00463367	NA	0	0	6	3.165e-39	0	eQTLGen_cis_eQTLs:GTEx/v8/Whole_Blood:GTEx/v8/Muscle_Skeletal	-	3.863e-12	rs113247976;rs111263678;rs116900480	19
ENSG00000185306	C12orf56	12	64660217	64784972	-1	protein_coding	115749	C12orf56	2.90933e-11	-0.257574	6	11.39	0	NA	NA	NA	NA	5.707e-09	rs61931525;rs147402969	20
ENSG00000184575	XPOT	12	64798130	64844907	1	protein_coding	11260	XPOT	0.997934	-0.449524	21	22.3	0	NA	NA	NA	NA	2.317e-08	rs61931525	20
ENSG00000183735	TBK1	12	64845660	64895888	1	protein_coding	29110	TBK1	0.995097	-0.430854	43	22.3	51	1.8069e-216	0	eQTLGen_cis_eQTLs:GTEx/v8/Whole_Blood:GTEx/v8/Muscle_Skeletal	+	5.707e-09	rs61931525;rs147402969	20
ENSG00000092140	G2E3	14	31028329	31089269	1	protein_coding	55632	G2E3	0.751141	-0.8183	59	18.31	159	3.9224e-49	0	eQTLGen_cis_eQTLs:GTEx/v8/Muscle_Skeletal	-	3.576e-15	rs7154847;rs4430662;rs35349033	21
ENSG00000092108	SCFD1	14	31091318	31205018	1	protein_coding	23256	SCFD1	0.991579	-0.0952235	117	22.9	164	3.27170000000001e-310	0	eQTLGen_cis_eQTLs:GTEx/v8/Whole_Blood:GTEx/v8/Brain_Anterior_cingulate_cortex_BA24:GTEx/v8/Brain_Cerebellar_Hemisphere:GTEx/v8/Brain_Cerebellum:GTEx/v8/Brain_Cortex:GTEx/v8/Brain_Frontal_Cortex_BA9:GTEx/v8/Muscle_Skeletal	+	3.576e-15	rs7154847;rs4430662;rs35349033	21
ENSG00000100473	COCH	14	31343720	31364271	1	protein_coding	1690	COCH	0.000262849	-0.0296523	0	0	96	4.9047e-11	0	eQTLGen_cis_eQTLs	-	3.576e-15	rs7154847;rs4430662;rs35349033	21
ENSG00000078328	RBFOX1	16	6069095	7763340	1	protein_coding	54715	RBFOX1	0.935961	1.09605	34	16.99	0	NA	NA	NA	NA	1.314e-08	rs74008540	22
ENSG00000109084	TMEM97	17	26646121	26655707	1	protein_coding	27346	TMEM97	0.028406	-1.00259	0	0	5	3.27170000000001e-310	0	eQTLGen_cis_eQTLs:GTEx/v8/Whole_Blood:GTEx/v8/Brain_Caudate_basal_ganglia	+	1.03e-08	rs739439	23
ENSG00000004142	POLDIP2	17	26673659	26684545	-1	protein_coding	26073	POLDIP2	0.0492455	NA	1	0.051	5	2.9275e-28	0	eQTLGen_cis_eQTLs:GTEx/v8/Brain_Caudate_basal_ganglia:GTEx/v8/Brain_Cerebellar_Hemisphere:GTEx/v8/Brain_Cerebellum:GTEx/v8/Brain_Cortex:GTEx/v8/Muscle_Skeletal	+	1.03e-08	rs739439	23
ENSG00000244045	TMEM199	17	26684604	26708716	1	protein_coding	100616388	TMEM199	0.000653685	-0.452214	2	3.854	2	9.50829e-06	4.23355e-14	eQTLGen_cis_eQTLs:GTEx/v8/Whole_Blood:GTEx/v8/Brain_Spinal_cord_cervical_c-1	+	1.732e-08	rs739439	23
ENSG00000109072	VTN	17	26691290	26700110	-1	protein_coding	645832	VTN	1.14001e-09	0.0584307	1	0.051	0	NA	NA	NA	NA	0.0002011	rs739439	23
ENSG00000273171	CTB-96E2.2	17	26691310	26695033	-1	protein_coding	NA	NA	NA	NA	1	0.051	0	NA	NA	NA	NA	0.0002011	rs739439	23
ENSG00000004139	SARM1	17	26691378	26728065	1	protein_coding	23098	SARM1	9.18623e-09	NA	4	9.02	5	1.2481e-25	0	eQTLGen_cis_eQTLs	+	1.03e-08	rs739439	23
ENSG00000076351	SLC46A1	17	26721661	26734215	-1	protein_coding	113235	SLC46A1	0.104423	NA	3	9.02	0	NA	NA	NA	NA	1.03e-08	rs739439	23
ENSG00000109113	RAB34	17	27041299	27045447	-1	protein_coding	100861437	RAB34	4.67975e-06	-0.41151	0	0	2	9.4769e-07	0.00298388579131181	eQTLGen_cis_eQTLs	-	6.705e-07	rs739439	23
ENSG00000076604	TRAF4	17	27071002	27077974	1	protein_coding	9618	TRAF4	0.840039	-0.458819	0	0	1	3.7322e-05	0.0496133	GTEx/v8/Brain_Anterior_cingulate_cortex_BA24	+	6.705e-07	rs739439	23
ENSG00000127220	ABHD8	19	17402940	17421045	-1	protein_coding	79575	ABHD8	0.642341	-0.202647	0	0	1	1.60762e-05	1.66435e-30	GTEx/v8/Muscle_Skeletal	+	2.292e-19	rs12973192	25
ENSG00000130477	UNC13A	19	17712137	17799401	-1	protein_coding	23025	UNC13A	0.999987	1.77626	10	11.72	0	NA	NA	NA	NA	3.638e-25	rs12973192;rs8111424	25
ENSG00000197818	SLC9A8	20	48429250	48508779	1	protein_coding	23315	SLC9A8	2.81662e-05	-1.58662	48	22.8	68	1.53142e-16	0	eQTLGen_cis_eQTLs:GTEx/v8/Brain_Caudate_basal_ganglia:GTEx/v8/Brain_Cerebellar_Hemisphere:GTEx/v8/Brain_Cerebellum:GTEx/v8/Brain_Cortex:GTEx/v8/Brain_Hypothalamus:GTEx/v8/Brain_Nucleus_accumbens_basal_ganglia:GTEx/v8/Muscle_Skeletal	+	2.076e-10	rs17785991;rs1543442	26
ENSG00000158480	SPATA2	20	48519928	48532080	-1	protein_coding	9825	SPATA2	0.848757	-0.801814	6	6.688	0	NA	NA	NA	NA	7.244e-10	rs17785991;rs1543442	26
ENSG00000124226	RNF114	20	48552948	48570429	1	protein_coding	55905	RNF114	0.0170046	-0.267169	7	4.965	32	8.8649e-14	0	eQTLGen_cis_eQTLs	-	7.244e-10	rs17785991;rs1543442	26
ENSG00000124216	SNAI1	20	48599536	48605423	1	protein_coding	6615	SNAI1	0.367003	0.0836781	7	7.246	14	8.2033e-08	0.000327311638446529	eQTLGen_cis_eQTLs:GTEx/v8/Brain_Spinal_cord_cervical_c-1	+	1.561e-08	rs17785991;rs1543442	26
ENSG00000172216	CEBPB	20	48807376	48809212	1	protein_coding	1051	CEBPB	0.184474	NA	0	0	1	7.0557e-06	0.0201183785722827	eQTLGen_cis_eQTLs	+	2.557e-08	rs1543442	26
ENSG00000156299	TIAM1	21	32490734	32932290	-1	protein_coding	7074	TIAM1	0.999932	-0.202222	7	17	0	NA	NA	NA	NA	7.415e-17	rs191161146;rs150723682;rs544727940;rs80265967	27
ENSG00000142168	SOD1	21	33031935	33041244	1	protein_coding	6647	SOD1	0.442189	-0.589491	1	9.992	0	NA	NA	NA	NA	5.887e-35	rs80265967	27
ENSG00000156304	SCAF4	21	33043346	33104388	-1	protein_coding	57466	SCAF4	1	NA	4	9.992	0	NA	NA	NA	NA	5.887e-35	rs80265967	27
ENSG00000159055	MIS18A	21	33640530	33651380	-1	protein_coding	54069	MIS18A	0.051722	0.37785	0	0	4	1.0218e-06	0.00317032866148479	eQTLGen_cis_eQTLs	+	1.832e-09	rs76833332	27
ENSG00000170262	MRAP	21	33664124	33687095	1	protein_coding	56246	MRAP	0.0106384	0.174432	2	3.586	0	NA	NA	NA	NA	3.42e-08	rs76833332;rs544727940	27
ENSG00000142207	URB1	21	33683329	33765335	-1	protein_coding	9875	URB1	NA	-0.491509	5	32	0	NA	NA	NA	NA	1.832e-09	rs544727940;rs76833332	27
ENSG00000256073	C21orf119	21	33765439	33766254	1	protein_coding	NA	C21orf119	NA	NA	1	1.667	0	NA	NA	NA	NA	1.832e-09	rs76833332	27
ENSG00000160214	RRP1	21	45209394	45225174	1	protein_coding	8568	RRP1	0.00185041	0.536353	0	0	1	6.59397e-06	0.0165655	GTEx/v8/Brain_Cerebellar_Hemisphere	+	1.439e-09	rs75087725	28
ENSG00000141959	PFKL	21	45719934	45747259	1	protein_coding	5211	PFKL	3.68287e-10	NA	1	11.95	1	1.3235e-08	7.05309053603488e-05	eQTLGen_cis_eQTLs	+	1.439e-09	rs75087725	28
ENSG00000160226	C21orf2	21	45748827	45759285	-1	protein_coding	755	C21orf2	0.0135304	0.633986	1	11.95	1	2.9104e-22	0	eQTLGen_cis_eQTLs	-	1.439e-09	rs75087725	28
Abbreviations:ensg,ENSG ID;symbol,Gene Symbol;chr,chromosome;start,Starting position of the gene;end,Ending position of the gene;strand,Strand of the gene;type,Gene biotype from Ensembl;entrezID,entrez ID (if available);HUGO,HUGO (HGNC) gene symbol;pLI,pLI score from ExAC database; ncRVIS,Non-coding residual variation intolerance score;posMapSNPs (posMap), Number of SNPs mapped to gene based on p…

## Sheet: STable3
Supplementary Table3 The genes mapped with posMap and eqtlMap using FUMA(Stage2).
ensg	symbol	chr	start	end	strand	type	entrezID	HUGO	pLI	ncRVIS	posMapSNPs	posMapMaxCADD	eqtlMapSNPs	eqtlMapminP	eqtlMapminQ	eqtlMapts	eqtlDirection	minGwasP	IndSigSNPs	GenomicLocus
ENSG00000198929	NOS1AP	1	162039564	162353321	1	protein_coding	9722	NOS1AP	0.119914	0.721922	2	1.129	0	NA	NA	NA	NA	2.21e-08	rs187245629	1
ENSG00000114742	WDR48	3	39093489	39138155	1	protein_coding	57599	WDR48	0.999806	-0.643071	0	0	8	5.5352e-08	0.000227502527805865	eQTLGen_cis_eQTLs	-	1.872e-11	rs1464047;rs631312;rs533577	2
ENSG00000114745	GORASP1	3	39138150	39149854	-1	protein_coding	64689	GORASP1	0.698378	1.0762	0	0	3	0.00014877	0.0157936	GTEx/v8/Muscle_Skeletal	-	5.296e-09	rs631312;rs533577	2
ENSG00000168329	CX3CR1	3	39304985	39323226	-1	protein_coding	1524	CX3CR1	0.107292	0.274774	0	0	59	8.38148e-17	0	eQTLGen_cis_eQTLs:GTEx/v8/Muscle_Skeletal	-	3.746e-10	rs533577;rs9820623;rs1464047;rs631312	2
ENSG00000179934	CCR8	3	39371197	39375171	1	protein_coding	1237	CCR8	0.0176258	-0.228972	0	0	1	1.5817e-11	0	eQTLGen_cis_eQTLs	-	0.001051	rs533577	2
ENSG00000144659	SLC25A38	3	39424839	39438842	1	protein_coding	54977	SLC25A38	0.0682178	-0.436245	5	11.91	58	1.7385e-12	0	eQTLGen_cis_eQTLs:GTEx/v8/Brain_Frontal_Cortex_BA9:GTEx/v8/Muscle_Skeletal	+	3.746e-10	rs631312;rs533577;rs9820623;rs1464047	2
ENSG00000168028	RPSA	3	39448180	39454033	1	protein_coding	574040	RPSA	0.751851	0.547666	8	8.021	86	1.59827e-41	0	eQTLGen_cis_eQTLs:GTEx/v8/Whole_Blood:GTEx/v8/Brain_Anterior_cingulate_cortex_BA24:GTEx/v8/Brain_Cerebellar_Hemisphere:GTEx/v8/Brain_Cerebellum:GTEx/v8/Brain_Cortex:GTEx/v8/Brain_Hippocampus:GTEx/v8/Brain_Spinal_cord_cervical_c-1:GTEx/v8/Muscle_Skeletal	+	1.872e-11	rs631312;rs533577;rs9820623;rs1464047	2
ENSG00000168314	MOBP	3	39508689	39570970	1	protein_coding	4336	MOBP	0.59201	2.19098	30	15.47	0	NA	NA	NA	NA	4.846e-12	rs9820623;rs631312;rs533577;rs1464047	2
ENSG00000114650	SCAP	3	47455203	47518616	-1	protein_coding	22937	SCAP	0.0225548	NA	0	0	6	1.0935e-12	0	eQTLGen_cis_eQTLs:GTEx/v8/Brain_Caudate_basal_ganglia:GTEx/v8/Brain_Cortex	+	1.69e-08	rs34711187	3
ENSG00000114646	CSPG5	3	47603729	47622282	-1	protein_coding	10675	CSPG5	0.41483	-0.836073	1	0.295	0	NA	NA	NA	NA	0.0001037	rs34711187	3
ENSG00000132153	DHX30	3	47844399	47891685	1	protein_coding	22907	DHX30	0.999999	NA	2	11.04	0	NA	NA	NA	NA	1.69e-08	rs34711187	3
ENSG00000047849	MAP4	3	47892182	48130769	-1	protein_coding	4134	MAP4	0.998849	-0.836309	3	26	7	1.7318e-21	0	eQTLGen_cis_eQTLs:GTEx/v8/Whole_Blood	+	1.69e-08	rs34711187	3
ENSG00000164045	CDC25A	3	48198636	48229892	-1	protein_coding	993	CDC25A	0.979698	-0.724001	0	0	1	0.000731188	1.6423e-73	GTEx/v8/Muscle_Skeletal	NA	NA	rs34711187	3
ENSG00000164048	ZNF589	3	48282590	48340743	1	protein_coding	51385	ZNF589	6.50061e-07	-0.372176	0	0	5	1.015e-34	0	eQTLGen_cis_eQTLs:GTEx/v8/Whole_Blood	-	1.69e-08	rs34711187	3
ENSG00000172113	NME6	3	48334754	48343175	-1	protein_coding	10201	NME6	9.21636e-05	-0.182941	0	0	1	6.8985e-07	0.00213367767324602	eQTLGen_cis_eQTLs	+	1.69e-08	rs34711187	3
ENSG00000229453	SPINK8	3	48348336	48369831	-1	protein_coding	646424	SPINK8	0.00112129	-0.205479	0	0	1	2.3148e-06	0.00676700855738302	eQTLGen_cis_eQTLs	-	1.69e-08	rs34711187	3
ENSG00000178467	P4HTM	3	49027319	49044587	1	protein_coding	54681	P4HTM	0.0232749	NA	0	0	1	1.8184e-07	0.000611964531035344	eQTLGen_cis_eQTLs	+	5.669e-05	rs34711187	3
ENSG00000178252	WDR6	3	49044495	49053386	1	protein_coding	11180	WDR6	9.19648e-07	-0.0589495	0	0	1	7.2134e-26	0	eQTLGen_cis_eQTLs	-	5.669e-05	rs34711187	3
ENSG00000145439	CBR4	4	169784921	169931426	-1	protein_coding	84869	CBR4	8.22222e-06	-0.354384	0	0	25	5.3199e-07	0.00172031076581576	eQTLGen_cis_eQTLs	+	7.689e-09	rs6831487	5
ENSG00000154447	SH3RF1	4	170015407	170192256	-1	protein_coding	57630	SH3RF1	0.0463955	-0.163773	0	0	54	9.9299e-141	0	eQTLGen_cis_eQTLs:GTEx/v8/Whole_Blood:GTEx/v8/Brain_Spinal_cord_cervical_c-1:GTEx/v8/Muscle_Skeletal	+	7.689e-09	rs6831487;rs6828248;rs2013478	5
ENSG00000137601	NEK1	4	170314426	170533780	-1	protein_coding	4750	NEK1	4.21851e-12	-0.433231	27	10.51	51	7.4506e-206	0	eQTLGen_cis_eQTLs:GTEx/v8/Whole_Blood:GTEx/v8/Muscle_Skeletal	+	7.689e-09	rs6831487;rs6828248;rs2013478	5
ENSG00000109572	CLCN3	4	170533784	170644824	1	protein_coding	1182	CLCN3	0.993265	-0.84734	25	10.65	53	4.5343e-15	0	eQTLGen_cis_eQTLs:GTEx/v8/Muscle_Skeletal	+	7.689e-09	rs6828248;rs2013478;rs6831487	5
ENSG00000056050	C4orf27	4	170650616	170679104	-1	protein_coding	54969	C4orf27	0.000423307	-0.492058	1	7.657	0	NA	NA	NA	NA	0.0006574	rs6828248	5
ENSG00000184838	PRR16	5	119799973	120023027	1	protein_coding	51334	PRR16	0.526199	-0.167736	2	3.092	0	NA	NA	NA	NA	NA	rs116038694	6
ENSG00000211445	GPX3	5	150400124	150408554	1	protein_coding	2878	GPX3	0.0155826	0.488879	10	8.065	14	8.2432e-60	0	eQTLGen_cis_eQTLs	+	2.215e-10	rs10463311;rs11748041	7
ENSG00000145901	TNIP1	5	150409506	150473138	-1	protein_coding	10318	TNIP1	0.929689	0.37663	14	8.065	14	1.5873e-49	0	eQTLGen_cis_eQTLs:GTEx/v8/Whole_Blood:GTEx/v8/Brain_Cerebellar_Hemisphere	-	2.215e-10	rs10463311;rs11748041	7
ENSG00000196743	GM2A	5	150591711	150650001	1	protein_coding	2760	GM2A	0.111186	1.53455	0	0	4	5.904e-06	0.0168544713497962	eQTLGen_cis_eQTLs	+	7.375e-05	rs11748041	7
ENSG00000214357	NEURL1B	5	172068269	172118543	1	protein_coding	54492	NEURL1B	0.370537	-0.289945	0	0	6	6.10086e-05	0.00496352	GTEx/v8/Whole_Blood	-	3.549e-08	rs2431213	8
ENSG00000113719	ERGIC1	5	172261278	172379688	1	protein_coding	57222	ERGIC1	0.714837	-0.270665	25	13.29	0	NA	NA	NA	NA	3.549e-08	rs517339;rs2431213	8
ENSG00000164463	CREBRF	5	172483355	172566291	1	protein_coding	153222	CREBRF	0.998406	-2.591	0	0	11	1.1025e-06	0.00335779816513761	eQTLGen_cis_eQTLs	+	3.86e-08	rs517339	8
ENSG00000113734	BNIP1	5	172571445	172591390	1	protein_coding	662	BNIP1	0.00143693	-0.218655	0	0	11	6.2339e-12	0	eQTLGen_cis_eQTLs	+	3.549e-08	rs2431213;rs517339	8
ENSG00000137337	MDC1	6	30667584	30685666	-1	protein_coding	9656	MDC1	0.000941847	1.23198	0	0	1	0.000112698	0.00669351	GTEx/v8/Brain_Cerebellum	-	6.055e-06	rs2077492	9
ENSG00000137312	FLOT1	6	30695486	30710510	-1	protein_coding	10211	FLOT1	0.0152734	NA	0	0	32	8.1231e-26	0	eQTLGen_cis_eQTLs	-	1.852e-08	rs2077492	9
ENSG00000137331	IER3	6	30710976	30712331	-1	protein_coding	8870	IER3	0.671462	0.0243271	0	0	20	1.6352e-47	0	eQTLGen_cis_eQTLs	-	1.852e-08	rs2077492	9
ENSG00000204580	DDR1	6	30844198	30867933	1	protein_coding	100616237	DDR1	0.0264779	0.516702	0	0	9	8.0739e-37	0	eQTLGen_cis_eQTLs	+	1.852e-08	rs2077492	9
ENSG00000137411	VARS2	6	30876019	30894236	1	protein_coding	57176	VARS2	4.2195e-14	NA	0	0	21	2.8756e-60	0	eQTLGen_cis_eQTLs:GTEx/v8/Whole_Blood	+	1.852e-08	rs2077492	9
ENSG00000204536	CCHCR1	6	31110216	31126015	-1	protein_coding	54535	CCHCR1	6.50104e-08	NA	0	0	18	1.2735e-20	0	eQTLGen_cis_eQTLs	-	2.623e-08	rs2077492	9
ENSG00000137310	TCF19	6	31126319	31134936	1	protein_coding	6941	TCF19	0.000232744	2.24538	0	0	21	3.9606e-08	0.000158589190560771	eQTLGen_cis_eQTLs	-	1.852e-08	rs2077492	9
ENSG00000204531	POU5F1	6	31132119	31148508	-1	protein_coding	5460	POU5F1	0.889691	0.511715	0	0	16	6.8136e-23	0	eQTLGen_cis_eQTLs	-	8.009e-07	rs2077492	9
ENSG00000206344	HCG27	6	31165537	31171745	1	protein_coding	253018	HCG27	NA	NA	0	0	34	1.9016e-31	0	eQTLGen_cis_eQTLs:GTEx/v8/Whole_Blood	-	1.852e-08	rs2077492	9
ENSG00000204525	HLA-C	6	31236526	31239907	-1	protein_coding	3107	HLA-C	9.94564e-10	8.44189	0	0	33	1.1994e-244	0	eQTLGen_cis_eQTLs:GTEx/v8/Brain_Cerebellar_Hemisphere:GTEx/v8/Brain_Cerebellum:GTEx/v8/Brain_Hypothalamus:GTEx/v8/Brain_Spinal_cord_cervical_c-1:GTEx/v8/Muscle_Skeletal	-	1.852e-08	rs2077492	9
ENSG00000234745	HLA-B	6	31321649	31324965	-1	protein_coding	3106	HLA-B	0.00266463	10.6253	0	0	10	3.9612e-55	0	eQTLGen_cis_eQTLs	-	1.852e-08	rs2077492	9
ENSG00000204520	MICA	6	31371356	31383092	1	protein_coding	100507436	MICA	0.00037802	2.27712	0	0	17	4.6545e-19	0	eQTLGen_cis_eQTLs:GTEx/v8/Muscle_Skeletal	-	1.852e-08	rs2077492	9
ENSG00000204516	MICB	6	31462658	31478901	1	protein_coding	4277	MICB	0.000284377	0.724392	0	0	17	1.9725e-08	2.62591e-46	eQTLGen_cis_eQTLs:GTEx/v8/Brain_Cerebellar_Hemisphere:GTEx/v8/Brain_Cerebellum:GTEx/v8/Muscle_Skeletal	-	8.009e-07	rs2077492	9
ENSG00000198563	DDX39B	6	31497996	31510225	-1	protein_coding	692199	DDX39B	0.997728	0.551698	0	0	7	1.7061e-07	0.000562675836198812	eQTLGen_cis_eQTLs	+	2.361e-07	rs2077492	9
ENSG00000213760	ATP6V1G2	6	31512239	31516204	-1	protein_coding	534	ATP6V1G2	0.22479	0.5586	0	0	10	6.2188e-28	0	eQTLGen_cis_eQTLs:GTEx/v8/Whole_Blood	+	1.852e-08	rs2077492	9
ENSG00000226979	LTA	6	31539831	31542101	1	protein_coding	4049	LTA	0.743247	0.0526	0	0	9	2.0334e-10	0	eQTLGen_cis_eQTLs	-	1.852e-08	rs2077492	9
ENSG00000232810	TNF	6	31543344	31546113	1	protein_coding	7124	TNF	0.272829	-0.462056	0	0	12	1.7036e-11	0	eQTLGen_cis_eQTLs	+	2.361e-07	rs2077492	9
ENSG00000204482	LST1	6	31553901	31556686	1	protein_coding	7940	LST1	0.00253791	0.289221	0	0	31	1.3433e-19	0	eQTLGen_cis_eQTLs:GTEx/v8/Whole_Blood	-	1.852e-08	rs2077492	9
ENSG00000204475	NCR3	6	31556672	31560762	-1	protein_coding	259197	NCR3	0.00146131	0.872155	0	0	8	1.373e-18	0	eQTLGen_cis_eQTLs	-	1.852e-08	rs2077492	9
ENSG00000204472	AIF1	6	31582961	31584798	1	protein_coding	199	AIF1	0.0127986	-0.264551	3	15.64	36	8.294e-80	0	eQTLGen_cis_eQTLs:GTEx/v8/Whole_Blood	+	1.852e-08	rs2077492	9
ENSG00000204469	PRRC2A	6	31588497	31605548	1	protein_coding	7916	PRRC2A	1	NA	15	25.9	37	2.7231e-31	0	eQTLGen_cis_eQTLs:GTEx/v8/Whole_Blood:GTEx/v8/Muscle_Skeletal	+	1.852e-08	rs2077492;rs9275477	09:10:00
ENSG00000204463	BAG6	6	31606805	31620482	-1	protein_coding	7917	BAG6	0.999988	-0.32119	20	25.9	10	1.04578e-13	0	eQTLGen_cis_eQTLs:GTEx/v8/Whole_Blood:GTEx/v8/Brain_Amygdala:GTEx/v8/Brain_Anterior_cingulate_cortex_BA24:GTEx/v8/Brain_Caudate_basal_ganglia:GTEx/v8/Brain_Cerebellar_Hemisphere:GTEx/v8/Brain_Cerebellum:GTEx/v8/Brain_Cortex:GTEx/v8/Brain_Frontal_Cortex_BA9:GTEx/v8/Brain_Hippocampus:GTEx/v8/Brain_Hypothalamus:GTEx/v8/Brain_Putamen_basal_ganglia:GTEx/v8/Muscle_Skeletal	+	1.852e-08	rs2077492	9
ENSG00000204444	APOM	6	31620193	31625987	1	protein_coding	55937	APOM	0.00854308	-0.533737	11	18.52	20	7.3175e-11	0	eQTLGen_cis_eQTLs:GTEx/v8/Muscle_Skeletal	+	1.852e-08	rs2077492	9
ENSG00000204439	C6orf47	6	31626075	31628549	-1	protein_coding	57827	C6orf47	0.169848	-0.557276	10	21.5	1	5.9151e-06	0.0168834282289482	eQTLGen_cis_eQTLs	-	7.47e-07	rs2077492	9
ENSG00000204438	GPANK1	6	31629006	31634060	-1	protein_coding	7918	GPANK1	0.000931901	0.994021	9	21.5	36	1.30196e-30	6.03308e-23	eQTLGen_cis_eQTLs:GTEx/v8/Muscle_Skeletal	-	1.852e-08	rs2077492	9
ENSG00000204435	CSNK2B	6	31633013	31638120	1	protein_coding	1460	CSNK2B	0.943857	0.192574	8	21.5	36	2.0757e-19	0	eQTLGen_cis_eQTLs:GTEx/v8/Whole_Blood:GTEx/v8/Brain_Nucleus_accumbens_basal_ganglia:GTEx/v8/Muscle_Skeletal	-	1.852e-08	rs2077492	9
ENSG00000263020	CSNK2B-LY6G5B-1181	6	31633879	31641323	1	protein_coding	NA	NA	0.196071	NA	9	21.5	0	NA	NA	NA	NA	8.107e-07	rs2077492	9
ENSG00000240053	LY6G5B	6	31637944	31641553	1	protein_coding	58496	LY6G5B	0.000871194	0.370528	9	21.5	37	4.0051e-175	0	eQTLGen_cis_eQTLs:GTEx/v8/Whole_Blood:GTEx/v8/Brain_Amygdala:GTEx/v8/Brain_Caudate_basal_ganglia:GTEx/v8/Brain_Cerebellar_Hemisphere:GTEx/v8/Brain_Cerebellum:GTEx/v8/Brain_Cortex:GTEx/v8/Brain_Frontal_Cortex_BA9:GTEx/v8/Brain_Hippocampus:GTEx/v8/Brain_Hypothalamus:GTEx/v8/Brain_Nucleus_accumbens_basal_ganglia:GTEx/v8/Brain_Putamen_basal_ganglia:GTEx/v8/Muscle_Skeletal	+	1.852e-08	rs2077492;rs9275477	09:10:00
ENSG00000204428	LY6G5C	6	31644461	31651817	-1	protein_coding	80741	LY6G5C	0.61467	0.183113	8	21.5	61	3.27170000000001e-310	0	eQTLGen_cis_eQTLs:GTEx/v8/Whole_Blood:GTEx/v8/Brain_Amygdala:GTEx/v8/Brain_Anterior_cingulate_cortex_BA24:GTEx/v8/Brain_Caudate_basal_ganglia:GTEx/v8/Brain_Cerebellar_Hemisphere:GTEx/v8/Brain_Cerebellum:GTEx/v8/Brain_Cortex:GTEx/v8/Brain_Frontal_Cortex_BA9:GTEx/v8/Brain_Hippocampus:GTEx/v8/Brain_Hypothalamus:GTEx/v8/Brain_Nucleus_accumbens_basal_ganglia:GTEx/v8/Brain_Putamen_basal_ganglia:GTEx/v8…	+	1.852e-08	rs2077492;rs2516006	09:10:00
ENSG00000204427	ABHD16A	6	31654726	31671221	-1	protein_coding	7920	ABHD16A	0.988883	-0.376322	11	16.57	25	2.21054e-06	0.0138127	GTEx/v8/Brain_Caudate_basal_ganglia:GTEx/v8/Brain_Nucleus_accumbens_basal_ganglia	-	2.361e-07	rs2077492	9
ENSG00000204422	XXbac-BPG32J3.20	6	31654739	31681849	-1	protein_coding	NA	NA	NA	NA	11	16.57	0	NA	NA	NA	NA	8.009e-07	rs2077492	9
ENSG00000204424	LY6G6F	6	31674640	31685581	1	protein_coding	259215	LY6G6F	2.55909e-06	-0.134424	4	16.57	0	NA	NA	NA	NA	9.256e-07	rs2077492	9
ENSG00000250641	MEGT1	6	31674681	31685695	1	protein_coding	259215	NA	2.30552e-05	NA	4	16.57	0	NA	NA	NA	NA	9.256e-07	rs2077492	9
ENSG00000244355	LY6G6D	6	31683133	31685581	1	protein_coding	259215	LY6G6D	0.542858	0.0652801	0	0	15	1.11201e-05	0.0202896	GTEx/v8/Whole_Blood	+	8.009e-07	rs2077492	9
ENSG00000204420	C6orf25	6	31686371	31694491	1	protein_coding	80739	C6orf25	0.00403769	-0.298211	0	0	17	1.34969e-05	2.19714e-05	GTEx/v8/Brain_Caudate_basal_ganglia	-	1.852e-08	rs2077492	9
ENSG00000204421	LY6G6C	6	31686425	31689622	-1	protein_coding	80740	LY6G6C	0.0016527	-0.0629606	0	0	10	5.58254e-06	0.000176493	GTEx/v8/Brain_Caudate_basal_ganglia	-	2.361e-07	rs2077492	9
ENSG00000213722	DDAH2	6	31694815	31698394	-1	protein_coding	23564	DDAH2	0.842139	-0.370986	0	0	36	9.1857e-67	0	eQTLGen_cis_eQTLs:GTEx/v8/Brain_Cerebellar_Hemisphere:GTEx/v8/Brain_Cerebellum:GTEx/v8/Brain_Cortex:GTEx/v8/Muscle_Skeletal	+	1.852e-08	rs2077492;rs2516006	09:10:00
ENSG00000213719	CLIC1	6	31698358	31707540	-1	protein_coding	1192	CLIC1	0.0124562	0.517818	0	0	10	5.8483e-06	0.0166406905646805	eQTLGen_cis_eQTLs:GTEx/v8/Muscle_Skeletal	+	7.47e-07	rs2077492	9
ENSG00000204410	MSH5	6	31707725	31732622	1	protein_coding	4439	MSH5	6.1388e-08	-0.0743933	0	0	4	1.5078e-07	0.000506820172694281	eQTLGen_cis_eQTLs	+	6.055e-06	rs2077492	9
ENSG00000228727	SAPCD1	6	31730576	31732628	1	protein_coding	401251	SAPCD1	2.31956e-07	-0.138259	0	0	10	3.4041e-06	0.00984903381642512	eQTLGen_cis_eQTLs	+	8.107e-07	rs2077492	9
ENSG00000204396	VWA7	6	31733367	31745108	-1	protein_coding	80737	VWA7	4.28881e-07	-0.117039	0	0	57	6.6504e-20	0	eQTLGen_cis_eQTLs:GTEx/v8/Whole_Blood:GTEx/v8/Muscle_Skeletal	+	2.11e-11	rs2077492;rs9275477;rs2516006	09:10:00
ENSG00000204390	HSPA1L	6	31777396	31783437	-1	protein_coding	3305	HSPA1L	2.19041e-06	-0.11285	0	0	27	2.204e-13	0	eQTLGen_cis_eQTLs	+	2.361e-07	rs2077492	9
ENSG00000204388	HSPA1B	6	31795512	31798031	1	protein_coding	3304	HSPA1B	NA	0.733333	0	0	34	2.9078e-74	0	eQTLGen_cis_eQTLs	+	1.852e-08	rs2077492	9
ENSG00000204387	C6orf48	6	31802385	31807541	1	protein_coding	50854	C6orf48	5.82447e-05	-0.0706833	0	0	34	3.9508e-59	0	eQTLGen_cis_eQTLs:GTEx/v8/Whole_Blood	+	1.852e-08	rs2077492	9
ENSG00000204386	NEU1	6	31825436	31830683	-1	protein_coding	4758	NEU1	1.93154e-05	-0.509633	0	0	3	1.1285e-06	0.00341242661448141	eQTLGen_cis_eQTLs	+	1.897e-05	rs2077492	9
ENSG00000204371	EHMT2	6	31847536	31865464	-1	protein_coding	10919	EHMT2	0.0644715	-0.142114	0	0	9	5.3789e-12	0	eQTLGen_cis_eQTLs	-	1.852e-08	rs2077492	9
ENSG00000204366	ZBTB12	6	31867384	31869769	-1	protein_coding	221527	ZBTB12	0.807401	NA	0	0	3	0.000130293	8.85936e-52	GTEx/v8/Whole_Blood	+	1.897e-05	rs2077492	9
ENSG00000204356	NELFE	6	31919864	31926887	-1	protein_coding	100302242	NELFE	0.756273	-0.0686102	0	0	3	5.3037e-06	2.18466e-05	eQTLGen_cis_eQTLs:GTEx/v8/Whole_Blood	+	1.897e-05	rs2077492	9
ENSG00000204351	SKIV2L	6	31926857	31937532	1	protein_coding	6499	SKIV2L	1.11012e-15	-0.360101	0	0	59	3.7982e-35	0	eQTLGen_cis_eQTLs	-	1.469e-08	rs2077492;rs2516006	09:10:00
ENSG00000204348	DXO	6	31937587	31940069	-1	protein_coding	1797	DXO	4.9848e-10	NA	0	0	3	1.5859e-05	0.00922641	eQTLGen_cis_eQTLs:GTEx/v8/Whole_Blood	+	8.009e-07	rs2077492	9
ENSG00000244731	C4A	6	31949801	31970458	1	protein_coding	721	C4A	NA	-0.318572	0	0	18	2.4865e-81	0	eQTLGen_cis_eQTLs:GTEx/v8/Whole_Blood:GTEx/v8/Brain_Caudate_basal_ganglia:GTEx/v8/Brain_Cortex:GTEx/v8/Brain_Hippocampus:GTEx/v8/Muscle_Skeletal	+	2.623e-08	rs2077492	9
ENSG00000224389	C4B	6	31982539	32003195	1	protein_coding	100293534	C4B	NA	-0.318572	0	0	20	1.7627e-129	0	eQTLGen_cis_eQTLs:GTEx/v8/Whole_Blood	-	1.852e-08	rs2077492	9
ENSG00000231852	CYP21A2	6	32006042	32009447	1	protein_coding	1589	CYP21A2	0.672307	0.394527	0	0	80	4.37e-72	0	eQTLGen_cis_eQTLs:GTEx/v8/Whole_Blood:GTEx/v8/Brain_Cerebellum:GTEx/v8/Brain_Cortex	+	8.602e-12	rs2077492;rs9275477;rs2516006	09:10:00
ENSG00000168477	TNXB	6	32008931	32083111	-1	protein_coding	7148	TNXB	0.774154	-0.827101	0	0	14	1.6987e-32	0	eQTLGen_cis_eQTLs	+	1.852e-08	rs2077492;rs9275477;rs2516006	09:10:00
ENSG00000213676	ATF6B	6	32065953	32096030	-1	protein_coding	1388	ATF6B	1.67701e-06	0.204046	0	0	39	3.981e-22	0	eQTLGen_cis_eQTLs:GTEx/v8/Brain_Nucleus_accumbens_basal_ganglia:GTEx/v8/Brain_Spinal_cord_cervical_c-1:GTEx/v8/Muscle_Skeletal	+	1.852e-08	rs2077492;rs9275477	09:10:00
ENSG00000204315	FKBPL	6	32096484	32098068	-1	protein_coding	63943	FKBPL	5.35499e-05	0.348686	0	0	25	4.603e-08	0.000177361119908786	eQTLGen_cis_eQTLs	-	1.469e-08	rs2516006	10
ENSG00000204314	PRRT1	6	32116136	32122150	-1	protein_coding	100507547	PRRT1	0.407946	-0.838939	0	0	2	1.1792e-05	0.0331316725978648	eQTLGen_cis_eQTLs	-	2.623e-08	rs2077492	9
ENSG00000221988	PPT2	6	32121218	32134011	1	protein_coding	80864	PPT2	0.772683	-0.617997	0	0	17	1.7288e-15	0	eQTLGen_cis_eQTLs	-	1.852e-08	rs2077492	9
ENSG00000204308	RNF5	6	32146131	32151930	1	protein_coding	6048	RNF5	0.00299042	0.00681417	0	0	26	8.0684e-14	0	eQTLGen_cis_eQTLs:GTEx/v8/Muscle_Skeletal	+	1.852e-08	rs2077492;rs9275477	09:10:00
ENSG00000204305	AGER	6	32148745	32152101	-1	protein_coding	177	AGER	1.46448e-10	-0.301869	0	0	12	1.9007e-13	0	eQTLGen_cis_eQTLs	-	2.361e-07	rs2077492	9
ENSG00000204304	PBX2	6	32152512	32157963	-1	protein_coding	5089	PBX2	0.889707	-0.473698	0	0	58	1.1635e-09	1.30932896890344e-05	eQTLGen_cis_eQTLs	-	2.11e-11	rs2077492;rs9275477	09:10:00
ENSG00000204301	NOTCH4	6	32162620	32191844	-1	protein_coding	4855	NOTCH4	1.19532e-10	0.0113186	0	0	17	3.4077e-18	0	eQTLGen_cis_eQTLs:GTEx/v8/Muscle_Skeletal	-	1.852e-08	rs2077492	9
ENSG00000204287	HLA-DRA	6	32407619	32412823	1	protein_coding	3122	HLA-DRA	0.700165	2.60729	0	0	59	7.2196e-10	2.40986e-12	eQTLGen_cis_eQTLs:GTEx/v8/Muscle_Skeletal	+	8.602e-12	rs9275477;rs2516006	10
ENSG00000198502	HLA-DRB5	6	32485120	32498064	-1	protein_coding	3127	HLA-DRB5	0.00322727	NA	1	0.207	146	3.6679e-231	0	eQTLGen_cis_eQTLs:GTEx/v8/Whole_Blood:GTEx/v8/Brain_Hypothalamus:GTEx/v8/Muscle_Skeletal	+	8.602e-12	rs9275477;rs2077492;rs2516006	09:10:00
ENSG00000196126	HLA-DRB1	6	32546546	32557625	-1	protein_coding	100996809	HLA-DRB1	5.62353e-05	10.1544	5	9.982	135	3.0427e-245	0	eQTLGen_cis_eQTLs:GTEx/v8/Whole_Blood:GTEx/v8/Brain_Amygdala:GTEx/v8/Brain_Anterior_cingulate_cortex_BA24:GTEx/v8/Brain_Caudate_basal_ganglia:GTEx/v8/Brain_Cerebellar_Hemisphere:GTEx/v8/Brain_Cerebellum:GTEx/v8/Brain_Cortex:GTEx/v8/Brain_Frontal_Cortex_BA9:GTEx/v8/Brain_Hypothalamus:GTEx/v8/Brain_Nucleus_accumbens_basal_ganglia:GTEx/v8/Brain_Putamen_basal_ganglia:GTEx/v8/Brain_Substantia_nigra:GT…	+	8.602e-12	rs9275477;rs2077492;rs2516006	09:10:00
ENSG00000196735	HLA-DQA1	6	32595956	32614839	1	protein_coding	100509457	HLA-DQA1	0.166625	NA	3	11.89	142	7.4092e-236	0	eQTLGen_cis_eQTLs:GTEx/v8/Whole_Blood:GTEx/v8/Brain_Spinal_cord_cervical_c-1:GTEx/v8/Muscle_Skeletal	+	8.602e-12	rs9275477;rs2077492;rs2516006	09:10:00
ENSG00000179344	HLA-DQB1	6	32627244	32636160	-1	protein_coding	101060835	HLA-DQB1	0.353015	22.5355	29	12.7	133	3.4463e-254	0	eQTLGen_cis_eQTLs:GTEx/v8/Whole_Blood:GTEx/v8/Brain_Amygdala:GTEx/v8/Brain_Anterior_cingulate_cortex_BA24:GTEx/v8/Brain_Caudate_basal_ganglia:GTEx/v8/Brain_Cerebellar_Hemisphere:GTEx/v8/Brain_Cerebellum:GTEx/v8/Brain_Cortex:GTEx/v8/Brain_Frontal_Cortex_BA9:GTEx/v8/Brain_Hippocampus:GTEx/v8/Brain_Hypothalamus:GTEx/v8/Brain_Nucleus_accumbens_basal_ganglia:GTEx/v8/Brain_Putamen_basal_ganglia:GTEx/v8…	+	8.602e-12	rs9275477;rs2516006;rs2077492	09:10:00
ENSG00000237541	HLA-DQA2	6	32709119	32714992	1	protein_coding	3118	HLA-DQA2	0.00504406	3.37251	0	0	119	3.27170000000001e-310	0	eQTLGen_cis_eQTLs:GTEx/v8/Whole_Blood:GTEx/v8/Brain_Amygdala:GTEx/v8/Brain_Anterior_cingulate_cortex_BA24:GTEx/v8/Brain_Caudate_basal_ganglia:GTEx/v8/Brain_Cerebellar_Hemisphere:GTEx/v8/Brain_Cerebellum:GTEx/v8/Brain_Cortex:GTEx/v8/Brain_Frontal_Cortex_BA9:GTEx/v8/Brain_Hippocampus:GTEx/v8/Brain_Hypothalamus:GTEx/v8/Brain_Nucleus_accumbens_basal_ganglia:GTEx/v8/Brain_Putamen_basal_ganglia:GTEx/v8…	-	8.602e-12	rs9275477;rs2516006	10
ENSG00000232629	HLA-DQB2	6	32723875	32731311	-1	protein_coding	3120	HLA-DQB2	0.00935593	2.05644	0	0	114	9.6865e-174	0	eQTLGen_cis_eQTLs:GTEx/v8/Whole_Blood:GTEx/v8/Brain_Caudate_basal_ganglia:GTEx/v8/Brain_Cerebellar_Hemisphere:GTEx/v8/Brain_Cerebellum:GTEx/v8/Brain_Cortex:GTEx/v8/Brain_Hippocampus:GTEx/v8/Brain_Hypothalamus:GTEx/v8/Brain_Nucleus_accumbens_basal_ganglia:GTEx/v8/Brain_Spinal_cord_cervical_c-1:GTEx/v8/Muscle_Skeletal	-	8.602e-12	rs9275477;rs2516006	10
ENSG00000241106	HLA-DOB	6	32780540	32784825	-1	protein_coding	3112	HLA-DOB	9.08752e-05	1.30943	0	0	99	2.704e-31	0	eQTLGen_cis_eQTLs:GTEx/v8/Whole_Blood:GTEx/v8/Brain_Cerebellum:GTEx/v8/Muscle_Skeletal	-	8.602e-12	rs9275477;rs2516006	10
ENSG00000204267	TAP2	6	32789610	32806557	-1	protein_coding	6891	TAP2	0.00171342	1.68723	0	0	111	8.6938e-68	0	eQTLGen_cis_eQTLs:GTEx/v8/Whole_Blood	+	8.602e-12	rs9275477;rs2516006	10
ENSG00000204264	PSMB8	6	32808494	32812480	-1	protein_coding	5696	PSMB8	0.0120032	-0.438663	0	0	37	4.0743e-08	0.000158559015665631	eQTLGen_cis_eQTLs	+	2.11e-11	rs9275477	10
ENSG00000240065	PSMB9	6	32811913	32827362	1	protein_coding	5698	PSMB9	0.225647	0.235564	0	0	95	5.0846e-15	0	eQTLGen_cis_eQTLs	+	8.602e-12	rs9275477;rs2516006	10
ENSG00000204252	HLA-DOA	6	32971955	32977389	-1	protein_coding	3111	HLA-DOA	1.88487e-05	3.6107	0	0	52	6.8823e-11	0	eQTLGen_cis_eQTLs	+	8.602e-12	rs9275477	10
ENSG00000178764	ZHX2	8	123793633	123986750	1	protein_coding	22882	ZHX2	0.408483	0.0303556	1	0.262	0	NA	NA	NA	NA	NA	rs145947991	11
ENSG00000120159	CAAP1	9	26840683	26892802	-1	protein_coding	79886	CAAP1	0.708932	-0.482712	1	4.282	0	NA	NA	NA	NA	NA	rs536668199	12
ENSG00000137055	PLAA	9	26904081	26947461	-1	protein_coding	9373	PLAA	0.648657	-0.44167	1	5.496	0	NA	NA	NA	NA	NA	rs187064754	12
ENSG00000096872	IFT74	9	26947037	27062928	1	protein_coding	80173	IFT74	9.26889e-06	-0.450404	6	11.71	0	NA	NA	NA	NA	NA	rs187064754;rs536668199	12
ENSG00000184434	LRRC19	9	26993134	27005691	-1	protein_coding	64922	LRRC19	5.16703e-05	0.0382254	2	11.71	0	NA	NA	NA	NA	NA	rs187064754	12
ENSG00000120156	TEK	9	27109139	27230173	1	protein_coding	7010	TEK	0.999993	0.253704	1	0.498	1	2.1987e-09	1.95579894386857e-05	eQTLGen_cis_eQTLs	-	4.292e-16	rs536668199;rs41272855	12
ENSG00000120160	EQTN	9	27284656	27297137	-1	protein_coding	54586	EQTN	1.3335e-07	0.656959	2	2.352	0	NA	NA	NA	NA	4.331e-12	rs536668199;rs186882747	12
ENSG00000120162	MOB3B	9	27325207	27529779	-1	protein_coding	79817	MOB3B	0.0303778	1.34091	121	18.5	25	1.59579e-14	4.77152e-35	eQTLGen_cis_eQTLs:GTEx/v8/Brain_Cerebellar_Hemisphere:GTEx/v8/Brain_Cerebellum	-	2.402e-48	rs553196048;rs187064754;rs576830492;rs572696784;rs543256162;rs148703839;rs12551344;rs10121017;rs7873548;rs12552327;rs4879515;rs3849937;rs774349;rs7019351;rs9969832;rs139185008;rs4879524;rs188460764;rs700786;rs774357;rs10967976;rs3736321;rs3849941;rs2492816;rs12345062;rs7848063;rs773720;rs36062268;rs34460171;rs2120721	12
ENSG00000147896	IFNK	9	27524312	27526496	1	protein_coding	56832	IFNK	9.61085e-09	1.73772	51	18.5	0	NA	NA	NA	NA	1.302e-45	rs7019351;rs774349;rs3849937;rs188460764;rs700786;rs774357;rs9969832;rs10967976;rs3736321	12
ENSG00000147894	C9orf72	9	27546544	27573864	-1	protein_coding	203228	C9orf72	0.000715132	0.264616	88	14.12	175	3.27170000000001e-310	0	eQTLGen_cis_eQTLs:GTEx/v8/Whole_Blood:GTEx/v8/Brain_Amygdala:GTEx/v8/Brain_Anterior_cingulate_cortex_BA24:GTEx/v8/Brain_Caudate_basal_ganglia:GTEx/v8/Brain_Cerebellar_Hemisphere:GTEx/v8/Brain_Cerebellum:GTEx/v8/Brain_Cortex:GTEx/v8/Brain_Frontal_Cortex_BA9:GTEx/v8/Brain_Hippocampus:GTEx/v8/Brain_Hypothalamus:GTEx/v8/Brain_Nucleus_accumbens_basal_ganglia:GTEx/v8/Brain_Putamen_basal_ganglia:GTEx/v8…	+	2.402e-48	rs188460764;rs774357;rs3849941;rs10967976;rs3736321;rs4879554;rs774358;rs773723;rs2120721;rs17696570;rs2492816;rs9969832;rs73440960;rs12345062;rs773720;rs12350076;rs7848063;rs148703839;rs12551344;rs10121017;rs7873548;rs12552327;rs4879515;rs3849937;rs774349;rs7019351;rs139185008;rs4879524;rs700786;rs36062268;rs34460171;rs7040117	12
ENSG00000174482	LINGO2	9	27948076	28670283	-1	protein_coding	158038	LINGO2	0.807167	-0.935732	20	13.58	0	NA	NA	NA	NA	6.488e-19	rs572696784;rs187891534;rs148500116;rs536668199;rs187064754;rs188424115;rs188413503	12
ENSG00000244242	IFITM10	11	1753640	1771821	-1	protein_coding	402778	IFITM10	NA	0.356777	3	4.903	0	NA	NA	NA	NA	5.06e-09	rs374866773	13
ENSG00000250644	RP11-295K3.1	11	1768897	1780281	-1	protein_coding	NA	NA	NA	NA	1	4.903	0	NA	NA	NA	NA	5.06e-09	rs374866773	13
ENSG00000117984	CTSD	11	1773982	1785222	-1	protein_coding	1509	CTSD	0.0891859	NA	1	4.903	0	NA	NA	NA	NA	5.06e-09	rs374866773	13
ENSG00000187398	LUZP2	11	24518516	25104150	1	protein_coding	338645	LUZP2	8.71328e-05	1.73069	1	7.634	0	NA	NA	NA	NA	2.107e-09	rs570212709	14
ENSG00000176495	OR5AN1	11	59131885	59132921	1	protein_coding	390195	OR5AN1	0.00117731	0.271048	1	0.753	0	NA	NA	NA	NA	2.273e-08	rs577231108	15
ENSG00000166888	STAT6	12	57489191	57525922	-1	protein_coding	6778	STAT6	0.100775	0.0810364	0	0	2	3.061e-20	0	eQTLGen_cis_eQTLs	+	3.911e-12	rs113247976	16
ENSG00000166986	MARS	12	57869228	57911352	1	protein_coding	102465454	MARS	2.73685e-12	-0.447643	0	0	2	3.7092e-10	0	eQTLGen_cis_eQTLs:GTEx/v8/Brain_Cortex	+	3.911e-12	rs113247976	16
ENSG00000175197	DDIT3	12	57910371	57914300	-1	protein_coding	1649	DDIT3	0.515502	-0.342173	0	0	2	1.4042e-09	1.30907186804556e-05	eQTLGen_cis_eQTLs	+	3.911e-12	rs113247976	16
ENSG00000175203	DCTN2	12	57923885	57941114	-1	protein_coding	10540	DCTN2	0.996367	-0.603791	0	0	1	0.000122433	3.28953e-23	GTEx/v8/Muscle_Skeletal	+	1.196e-09	rs113247976	16
ENSG00000155980	KIF5A	12	57943781	57980415	1	protein_coding	3798	KIF5A	0.99998	-0.906161	1	18.2	0	NA	NA	NA	NA	3.911e-12	rs113247976	16
ENSG00000166908	PIP4K2C	12	57984957	57997198	1	protein_coding	79837	PIP4K2C	0.0133787	-0.691827	1	18.2	0	NA	NA	NA	NA	3.911e-12	rs113247976	16
ENSG00000135439	AGAP2	12	58118980	58135940	-1	protein_coding	116986	AGAP2	0.999219	NA	1	1.269	0	NA	NA	NA	NA	1.196e-09	rs113247976	16
ENSG00000135452	TSPAN31	12	58131796	58143994	1	protein_coding	6302	TSPAN31	0.327259	0.149905	1	1.269	0	NA	NA	NA	NA	1.196e-09	rs113247976	16
ENSG00000135446	CDK4	12	58141510	58149796	-1	protein_coding	1019	CDK4	0.932017	-0.277374	1	1.269	0	NA	NA	NA	NA	1.196e-09	rs113247976	16
ENSG00000139266	MARCHF9	12	58148881	58154190	1	protein_coding	92979	2025-03-09	0.35028	-0.4225	1	1.269	0	NA	NA	NA	NA	1.196e-09	rs113247976	16
ENSG00000123427	METTL21B	12	58165275	58176324	1	protein_coding	25895	METTL21B	0.00509294	-0.79524	0	0	3	1.6888e-42	0	eQTLGen_cis_eQTLs	-	3.911e-12	rs113247976;rs116900480	16
ENSG00000166896	XRCC6BP1	12	58335324	58351052	1	protein_coding	91419	XRCC6BP1	0.00463367	NA	0	0	3	1.9113e-22	0	eQTLGen_cis_eQTLs	-	3.911e-12	rs113247976;rs116900480	16
ENSG00000185306	C12orf56	12	64660217	64784972	-1	protein_coding	115749	C12orf56	2.90933e-11	-0.257574	6	11.39	0	NA	NA	NA	NA	2.938e-09	rs61931525;rs61933205;rs147402969	17
ENSG00000184575	XPOT	12	64798130	64844907	1	protein_coding	11260	XPOT	0.997934	-0.449524	21	22.3	0	NA	NA	NA	NA	2.15e-09	rs61933205;rs61931525;rs61933200	17
ENSG00000183735	TBK1	12	64845660	64895888	1	protein_coding	29110	TBK1	0.995097	-0.430854	43	22.3	51	1.8069e-216	0	eQTLGen_cis_eQTLs:GTEx/v8/Whole_Blood:GTEx/v8/Muscle_Skeletal	+	7.509e-10	rs61933200;rs61933205;rs61931525;rs147402969	17
ENSG00000188342	GTF2F2	13	45694650	45858237	1	protein_coding	2963	GTF2F2	0.0252302	-0.67715	0	0	41	1.235e-12	0	eQTLGen_cis_eQTLs	-	5.187e-09	rs2985994	18
ENSG00000136152	COG3	13	46039060	46110765	1	protein_coding	83548	COG3	0.999143	-1.07384	54	16.11	43	9.9684e-28	0	eQTLGen_cis_eQTLs:GTEx/v8/Brain_Cerebellar_Hemisphere:GTEx/v8/Brain_Cerebellum	+	5.187e-09	rs2985994	18
ENSG00000165837	FAM194B	13	46108657	46189874	-1	protein_coding	220081	FAM194B	NA	-0.524885	11	10.96	0	NA	NA	NA	NA	5.187e-09	rs2985994	18
ENSG00000092140	G2E3	14	31028329	31089269	1	protein_coding	55632	G2E3	0.751141	-0.8183	50	18.31	141	3.9224e-49	0	eQTLGen_cis_eQTLs:GTEx/v8/Muscle_Skeletal	-	3.728e-14	rs229176;rs2273519;rs8022650;rs229244;rs11626600;rs7154847;rs2198639	19
ENSG00000092108	SCFD1	14	31091318	31205018	1	protein_coding	23256	SCFD1	0.991579	-0.0952235	105	22.9	145	3.27170000000001e-310	0	eQTLGen_cis_eQTLs:GTEx/v8/Whole_Blood:GTEx/v8/Brain_Anterior_cingulate_cortex_BA24:GTEx/v8/Brain_Cerebellar_Hemisphere:GTEx/v8/Brain_Cerebellum:GTEx/v8/Brain_Cortex:GTEx/v8/Brain_Frontal_Cortex_BA9:GTEx/v8/Muscle_Skeletal	+	3.728e-14	rs229176;rs7154847;rs229244;rs2273519;rs11626600;rs8022650;rs2198639	19
ENSG00000100473	COCH	14	31343720	31364271	1	protein_coding	1690	COCH	0.000262849	-0.0296523	0	0	96	4.9047e-11	0	eQTLGen_cis_eQTLs	-	3.728e-14	rs2198639;rs229176;rs8022650;rs229244;rs11626600;rs2273519;rs7154847	19
ENSG00000151322	NPAS3	14	33404139	34273382	1	protein_coding	64067	NPAS3	0.980549	NA	2	6.981	0	NA	NA	NA	NA	1.125e-10	rs148781797	20
ENSG00000109084	TMEM97	17	26646121	26655707	1	protein_coding	27346	TMEM97	0.028406	-1.00259	0	0	3	3.27170000000001e-310	0	eQTLGen_cis_eQTLs:GTEx/v8/Whole_Blood:GTEx/v8/Brain_Caudate_basal_ganglia	+	3.937e-08	rs739439	22
ENSG00000004142	POLDIP2	17	26673659	26684545	-1	protein_coding	26073	POLDIP2	0.0492455	NA	0	0	3	2.9275e-28	0	eQTLGen_cis_eQTLs:GTEx/v8/Brain_Caudate_basal_ganglia:GTEx/v8/Brain_Cerebellar_Hemisphere:GTEx/v8/Brain_Cerebellum:GTEx/v8/Brain_Cortex:GTEx/v8/Muscle_Skeletal	+	3.937e-08	rs739439	22
ENSG00000244045	TMEM199	17	26684604	26708716	1	protein_coding	100616388	TMEM199	0.000653685	-0.452214	1	3.854	2	9.50829e-06	4.23355e-14	eQTLGen_cis_eQTLs:GTEx/v8/Whole_Blood:GTEx/v8/Brain_Spinal_cord_cervical_c-1	+	7.106e-08	rs739439	22
ENSG00000004139	SARM1	17	26691378	26728065	1	protein_coding	23098	SARM1	9.18623e-09	NA	3	9.02	3	1.2481e-25	0	eQTLGen_cis_eQTLs	+	3.937e-08	rs739439	22
ENSG00000076351	SLC46A1	17	26721661	26734215	-1	protein_coding	113235	SLC46A1	0.104423	NA	2	9.02	0	NA	NA	NA	NA	3.937e-08	rs739439	22
ENSG00000109113	RAB34	17	27041299	27045447	-1	protein_coding	100861437	RAB34	4.67975e-06	-0.41151	0	0	1	1.2266e-05	0.0344420728092019	eQTLGen_cis_eQTLs	-	2.724e-06	rs739439	22
ENSG00000076604	TRAF4	17	27071002	27077974	1	protein_coding	9618	TRAF4	0.840039	-0.458819	0	0	1	3.7322e-05	0.0496133	GTEx/v8/Brain_Anterior_cingulate_cortex_BA24	+	2.724e-06	rs739439	22
ENSG00000127220	ABHD8	19	17402940	17421045	-1	protein_coding	79575	ABHD8	0.642341	-0.202647	0	0	1	1.60762e-05	1.66435e-30	GTEx/v8/Muscle_Skeletal	+	7.51e-20	rs12973192	24
ENSG00000130477	UNC13A	19	17712137	17799401	-1	protein_coding	23025	UNC13A	0.999987	1.77626	9	9.58	0	NA	NA	NA	NA	8.314e-27	rs12973192;rs8111424;rs36108613;rs12608932	24
ENSG00000197818	SLC9A8	20	48429250	48508779	1	protein_coding	23315	SLC9A8	2.81662e-05	-1.58662	41	14.54	52	1.53142e-16	0	eQTLGen_cis_eQTLs:GTEx/v8/Brain_Cerebellar_Hemisphere:GTEx/v8/Brain_Cerebellum:GTEx/v8/Brain_Cortex:GTEx/v8/Brain_Hypothalamus:GTEx/v8/Brain_Nucleus_accumbens_basal_ganglia:GTEx/v8/Muscle_Skeletal	+	9.496e-10	rs645544;rs4810992;rs2869935	25
ENSG00000158480	SPATA2	20	48519928	48532080	-1	protein_coding	9825	SPATA2	0.848757	-0.801814	5	6.688	0	NA	NA	NA	NA	9.497e-10	rs2869935;rs4810992	25
ENSG00000124226	RNF114	20	48552948	48570429	1	protein_coding	55905	RNF114	0.0170046	-0.267169	5	4.965	24	3.1318e-49	0	eQTLGen_cis_eQTLs	-	9.497e-10	rs2869935;rs4810992;rs645544	25
ENSG00000124216	SNAI1	20	48599536	48605423	1	protein_coding	6615	SNAI1	0.367003	0.0836781	2	2.977	0	NA	NA	NA	NA	1.388e-08	rs4810992	25
ENSG00000206102	KRTAP19-8	21	32410478	32410795	-1	protein_coding	728299	KRTAP19-8	0.00748612	0.459789	1	4.032	0	NA	NA	NA	NA	NA	rs191161146	26
ENSG00000156299	TIAM1	21	32490734	32932290	-1	protein_coding	7074	TIAM1	0.999932	-0.202222	3	17	0	NA	NA	NA	NA	4.319e-09	rs191161146;rs150723682;rs80265967	1 day, 2:27:00
ENSG00000142168	SOD1	21	33031935	33041244	1	protein_coding	6647	SOD1	0.442189	-0.589491	1	9.992	0	NA	NA	NA	NA	1.49e-34	rs80265967	27
ENSG00000156304	SCAF4	21	33043346	33104388	-1	protein_coding	57466	SCAF4	1	NA	4	9.992	0	NA	NA	NA	NA	1.49e-34	rs80265967	27
ENSG00000159055	MIS18A	21	33640530	33651380	-1	protein_coding	54069	MIS18A	0.051722	0.37785	0	0	4	1.0218e-06	0.00317032866148479	eQTLGen_cis_eQTLs	+	1.896e-09	rs76833332	27
ENSG00000170262	MRAP	21	33664124	33687095	1	protein_coding	56246	MRAP	0.0106384	0.174432	1	0.536	0	NA	NA	NA	NA	6.017e-08	rs76833332	27
ENSG00000142207	URB1	21	33683329	33765335	-1	protein_coding	9875	URB1	NA	-0.491509	3	2.014	0	NA	NA	NA	NA	1.896e-09	rs76833332	27
ENSG00000256073	C21orf119	21	33765439	33766254	1	protein_coding	NA	C21orf119	NA	NA	1	1.667	0	NA	NA	NA	NA	1.896e-09	rs76833332	27
ENSG00000160214	RRP1	21	45209394	45225174	1	protein_coding	8568	RRP1	0.00185041	0.536353	0	0	1	6.59397e-06	0.0165655	GTEx/v8/Brain_Cerebellar_Hemisphere	+	1.706e-09	rs75087725	28
ENSG00000141959	PFKL	21	45719934	45747259	1	protein_coding	5211	PFKL	3.68287e-10	NA	1	11.95	1	1.3235e-08	7.05309053603488e-05	eQTLGen_cis_eQTLs	+	1.706e-09	rs75087725	28
ENSG00000160226	C21orf2	21	45748827	45759285	-1	protein_coding	755	C21orf2	0.0135304	0.633986	1	11.95	1	2.9104e-22	0	eQTLGen_cis_eQTLs	-	1.706e-09	rs75087725	28
Abbreviations:ensg,ENSG ID;symbol,Gene Symbol;chr,chromosome;start,Starting position of the gene;end,Ending position of the gene;strand,Strand of the gene;type,Gene biotype from Ensembl;entrezID,entrez ID (if available);HUGO,HUGO (HGNC) gene symbol;pLI,pLI score from ExAC database; ncRVIS,Non-coding residual variation intolerance score;posMapSNPs (posMap), Number of SNPs mapped to gene based on p…

## Sheet: Stable4
Supplementary Table4 Gene-based association analyses result using MAGMA from ALS GWAS meta-analyses(P.fdr< 0.05).
GENE	SYMBOL	CHR	START	STOP	NSNPS	NPARAM	N	ZSTAT	P	P.fdr
56832	IFNK	9	27524312	27526496	19	8	740868	8.0023	6.1062e-16	1.11304e-11
55632	G2E3	14	31028329	31089046	208	39	740868	7.108	5.8853e-13	5.27148e-09
79817	MOB3B	9	27325207	27530223	1048	114	740868	7.0543	8.6759e-13	5.27148e-09
23256	SCFD1	14	31091460	31205034	377	34	740868	6.4803	4.5781e-11	2.08624e-07
203228	C9orf72	9	27546543	27573864	145	25	740868	6.1094	5e-10	1.8228e-06
29110	TBK1	12	64845840	64895899	143	29	740868	5.8628	2.276e-09	6.91449e-06
10318	TNIP1	5	150409504	150467221	284	47	740868	5.7273	5.1017e-09	1.32848e-05
7917	BAG6	6	31606805	31620953	61	22	740868	5.4078	3.1899e-08	7.26819e-05
6302	TSPAN31	12	58138784	58142026	7	5	740868	5.085	1.8386e-07	0.000372378
6647	SOD1	21	33031935	33041244	27	11	740868	5.0303	2.448e-07	0.000440267
115749	C12orf56	12	64660763	64784345	469	44	740868	5.0086	2.7414e-07	0.000440267
23315	SLC9A8	20	48429250	48508779	353	32	740868	4.9979	2.8984e-07	0.000440267
7916	PRRC2A	6	31588450	31605554	100	30	740868	4.9563	3.5929e-07	0.000445116
11260	XPOT	12	64798153	64842464	102	25	740868	4.9477	3.7543e-07	0.000445116
1182	CLCN3	4	170541672	170644338	361	30	740868	4.9449	3.8084e-07	0.000445116
7920	ABHD16A	6	31654726	31671137	60	21	740868	4.9399	3.9071e-07	0.000445116
2878	GPX3	5	150399999	150408554	50	12	740868	4.8589	5.9028e-07	0.000632919
1460	CSNK2B	6	31632995	31637844	24	13	740868	4.7337	1.1021e-06	0.00111606
79631	EFL1	15	82422561	82555104	604	45	740868	4.6774	1.4529e-06	0.00139387
79154	DHRS11	17	34948226	34957233	11	2	740868	4.6239	1.8832e-06	0.00166769
9326	ZNHIT3	17	34842471	34855154	18	4	740868	4.6197	1.9213e-06	0.00166769
55905	RNF114	20	48552914	48570422	70	19	740868	4.5994	2.1184e-06	0.00175519
79893	GGNBP2	17	34900737	34946278	57	6	740868	4.5752	2.3794e-06	0.00188573
9825	SPATA2	20	48519928	48532080	59	16	740868	4.5313	2.9308e-06	0.00222594
23025	UNC13A	19	17712137	17799123	428	85	740868	4.4682	3.9438e-06	0.0028755
3118	HLA-DQA2	6	32709156	32714664	98	14	740868	4.4452	4.3915e-06	0.00307878
57222	ERGIC1	5	172261223	172379688	563	91	740868	4.4355	4.5926e-06	0.00310052
1388	ATF6B	6	32083045	32096017	47	27	740868	4.419	4.9589e-06	0.00322824
51703	ACSL5	10	114133916	114188138	167	26	740868	4.4053	5.2813e-06	0.00331957
55815	TSNAXIP1	16	67840829	67861971	67	24	740868	4.395	5.5374e-06	0.00336452
123722	FSD2	15	83426827	83474850	167	36	740868	4.3856	5.7847e-06	0.00339895
2580	GAK	4	843065	926174	469	53	740868	4.3788	5.967e-06	0.00339895
23048	FNBP1	9	132649458	132805473	711	48	740868	4.3669	6.3015e-06	0.00348072
2591	GALNT3	2	166604313	166650803	130	30	740868	4.2873	9.0419e-06	0.00476407
5579	PRKCB	16	23847300	24231932	1716	143	740868	4.2847	9.1476e-06	0.00476407
1743	DLST	14	75348594	75370450	95	21	740868	4.254	1.05e-05	0.0053165
7918	GPANK1	6	31629006	31634060	37	16	740868	4.2385	1.125e-05	0.0055423
123720	WHAMM	15	83476959	83503613	110	27	740868	4.2297	1.1699e-05	0.00561183
23053	ZSWIM8	10	75545334	75561556	14	8	740868	4.2168	1.2389e-05	0.00579043
64429	ZDHHC6	10	114190058	114207301	45	13	740868	4.1876	1.4098e-05	0.00642446
4208	MEF2C	5	88014058	88199922	510	47	740868	4.1635	1.567e-05	0.00696665
2583	B4GALNT1	12	58019678	58027022	24	8	740868	4.1199	1.8953e-05	0.0082256
4750	NEK1	4	170314421	170533778	785	31	740868	4.0999	2.0666e-05	0.00858622
80740	LY6G6C	6	31686425	31689511	16	8	740868	4.0992	2.0726e-05	0.00858622
81577	GFOD2	16	67708436	67753273	127	33	740868	4.0841	2.2128e-05	0.00896331
134548	SOWAHA	5	132149033	132152489	7	3	740868	4.0732	2.3185e-05	0.00918731
84286	TMEM175	4	926175	952444	106	29	740868	4.0679	2.3722e-05	0.0092001
389075	RESP18	2	220192131	220197899	27	4	740868	4.063	2.4227e-05	0.0092002
29113	C6orf15	6	31079000	31080332	20	6	740868	4.0497	2.5643e-05	0.0095392
83694	RPS6KL1	14	75370657	75389985	78	18	740868	4.044	2.627e-05	0.00957699
83548	COG3	13	46039030	46110833	289	21	740868	3.9992	3.1778e-05	0.0112162
56919	DHX33	17	5344232	5372380	116	32	740868	3.9976	3.1997e-05	0.0112162
57610	RANBP10	16	67756973	67840788	240	45	740868	3.9854	3.3681e-05	0.0115837
58155	PTBP2	1	97187161	97280605	356	35	740868	3.9297	4.2535e-05	0.0143579
1200	TPP1	11	6633997	6640692	24	12	740868	3.9238	4.3588e-05	0.0144459
3798	KIF5A	12	57943812	57980416	91	32	740868	3.9169	4.4857e-05	0.014601
79731	NARS2	11	78147007	78285909	559	19	740868	3.8994	4.8213e-05	0.015418
54832	VPS13C	15	62144588	62352664	871	41	740868	3.8794	5.2349e-05	0.0163572
56135	PCDHAC1	5	140306302	140391929	335	46	740868	3.8763	5.3023e-05	0.0163572
80152	CENPT	16	67862060	67881361	59	18	740868	3.8726	5.3842e-05	0.0163572
10204	NUTF2	16	67880819	67906470	77	23	740868	3.8636	5.5874e-05	0.0166963
2661	GDF9	5	132196877	132202238	21	9	740868	3.8583	5.7084e-05	0.0167827
9814	SFI1	22	31892125	32014537	574	32	740868	3.837	6.2264e-05	0.0172956
3120	HLA-DQB2	6	32723837	32731330	75	9	740868	3.8362	6.2475e-05	0.0172956
26100	WIPI2	7	5229835	5273486	231	46	740868	3.8362	6.2489e-05	0.0172956
64320	RNF25	2	219528587	219536781	26	5	740868	3.8356	6.2624e-05	0.0172956
80345	ZSCAN16	6	28092334	28097864	23	9	740868	3.8248	6.544e-05	0.0178036
57700	FHIP2A	10	116581503	116659586	332	27	740868	3.8018	7.1818e-05	0.0192514
10476	ATP5PD	17	73034955	73043074	31	10	740868	3.7978	7.3005e-05	0.019286
146206	CARMIL2	16	67679030	67691472	32	12	740868	3.7714	8.1168e-05	0.020955
23510	KCTD2	17	73043279	73061981	87	23	740868	3.77	8.1622e-05	0.020955
84812	PLCD4	2	219472488	219501909	85	20	740868	3.7549	8.6694e-05	0.021948
284098	PIGW	17	34890849	34895217	4	2	740868	3.7488	8.8839e-05	0.022183
3017	H2BC5	6	26157419	26171577	54	26	740868	3.736	9.3492e-05	0.0230294
6338	SCNN1B	16	23313591	23392620	303	59	740868	3.7046	0.00010585	0.0257258
7701	ZNF142	2	219502639	219524355	68	15	740868	3.6876	0.00011317	0.0269324
83729	INHBE	12	57849096	57851791	5	3	740868	3.6852	0.00011426	0.0269324
53339	BTBD1	15	83685175	83736106	184	36	740868	3.6806	0.00011637	0.0269324
5798	PTPRN	2	220154345	220174295	65	17	740868	3.679	0.00011706	0.0269324
115557	ARHGEF25	12	58003963	58011028	18	8	740868	3.6749	0.00011895	0.0269324
5681	PSKH1	16	67927175	67963581	99	25	740868	3.6734	0.00011968	0.0269324
64180	DPEP3	16	68009566	68014452	18	9	740868	3.667	0.00012268	0.02701
8642	DCHS1	11	6642556	6685320	160	45	740868	3.6658	0.00012328	0.02701
415117	STX19	3	93733078	93747460	25	11	740868	3.6633	0.00012447	0.02701
201562	HACD2	3	123213363	123303924	371	32	740868	3.6455	0.00013346	0.0286201
23761	PISD	22	32014477	32058550	213	29	740868	3.6395	0.0001366	0.0289528
8120	AP3B2	15	83328033	83378660	186	42	740868	3.6309	0.00014122	0.029588
53834	FGFRL1	4	1004712	1020686	96	26	740868	3.6264	0.00014371	0.0297676
6560	SLC12A4	16	67977377	68002597	71	24	740868	3.6226	0.00014584	0.0298693
400581	GRAPL	17	19030782	19062148	1	1	740868	3.6195	0.0001476	0.0298939
79922	MRM1	17	34958010	34965407	11	3	740868	3.6041	0.00015664	0.0313762
8560	DEGS1	1	224370910	224381143	31	9	740868	3.5957	0.00016176	0.0320496
9727	RAB11FIP3	16	475649	572485	408	48	740868	3.5906	0.00016498	0.0320909
2636	GBX1	7	150845676	150864867	54	22	740868	3.5886	0.00016625	0.0320909
23644	EDC4	16	67906926	67918417	23	8	740868	3.587	0.00016725	0.0320909
388284	C16orf86	16	67700662	67702661	4	2	740868	3.5815	0.00017082	0.0322936
79033	ERI3	1	44686742	44821315	369	39	740868	3.5799	0.00017185	0.0322936
90353	CTU1	19	51600863	51611647	49	11	740868	3.57	0.00017849	0.0331991
23400	ATP13A2	1	17312453	17338467	68	16	740868	3.5639	0.00018272	0.0336426
51398	WDR83OS	19	12778881	12780465	4	2	740868	3.5587	0.00018638	0.033947
56478	EIF4ENIF1	22	31835345	31885936	208	46	740868	3.554	0.00018973	0.033947
617	BCS1L	2	219524379	219528166	7	2	740868	3.5537	0.00018996	0.033947
56253	CRTAM	11	122709255	122743347	142	40	740868	3.5495	0.00019298	0.0341518
1609	DGKQ	4	952672	967348	64	18	740868	3.5359	0.00020323	0.03562
57558	USP35	11	77899858	77925757	99	23	740868	3.524	0.00021258	0.0368459
22907	DHX30	3	47844399	47891686	77	20	740868	3.5201	0.00021571	0.0368459
6615	SNAI1	20	48599513	48605423	31	4	740868	3.519	0.00021657	0.0368459
10675	CSPG5	3	47603728	47621730	34	10	740868	3.5169	0.00021831	0.0368459
9125	CNOT9	2	219433303	219461158	69	10	740868	3.5056	0.00022775	0.0380865
10117	ENAM	4	71494461	71512536	55	9	740868	3.4865	0.00024473	0.040554
8509	NDST2	10	75561669	75571589	18	9	740868	3.4785	0.00025208	0.0413956
80179	MYO19	17	34851599	34891305	58	7	740868	3.4708	0.00025946	0.0422271
3425	IDUA	4	980785	998317	102	30	740868	3.4578	0.00027235	0.0439327
9524	TECR	19	14640379	14676792	170	35	740868	3.4354	0.0002958	0.0472969
6599	SMARCC1	3	47627378	47823405	391	31	740868	3.4063	0.00032925	0.0521876
6304	SATB1	3	18389133	18480265	322	50	740868	3.4023	0.00033408	0.0524966
51701	NLK	17	26369009	26523407	199	92	740868	3.3984	0.0003389	0.0527989
3106	HLA-B	6	31321649	31324989	122	26	740868	3.3853	0.00035544	0.0544554
283571	PROX2	14	75319736	75330562	42	15	740868	3.3841	0.00035703	0.0544554
199	AIF1	6	31582969	31584798	9	4	740868	3.3825	0.00035921	0.0544554
23149	FCHO1	19	17858527	17899377	186	30	740868	3.3789	0.00036391	0.0544554
259215	LY6G6F	6	31674625	31678372	16	8	740868	3.3783	0.00036463	0.0544554
200894	ARL13B	3	93698983	93774522	155	51	740868	3.3739	0.00037051	0.0544554
4287	ATXN3	14	92524896	92572965	301	13	740868	3.3712	0.00037427	0.0544554
50855	PARD6A	16	67694851	67696681	4	2	740868	3.3707	0.00037486	0.0544554
3131	HLF	17	53342321	53402426	191	48	740868	3.3696	0.00037642	0.0544554
57466	SCAF4	21	33043313	33104431	202	37	740868	3.3671	0.00037987	0.0545218
80739	MPIG6B	6	31691121	31694487	9	5	740868	3.3648	0.00038293	0.0545316
57161	PELI2	14	56585039	56768241	797	40	740868	3.3429	0.00041456	0.0585783
9654	TTLL4	2	219575558	219620139	142	14	740868	3.3319	0.00043131	0.0601413
1240	CMKLR1	12	108681821	108733094	252	63	740868	3.3313	0.00043222	0.0601413
10659	CELF2	10	10838851	11378674	2571	189	740868	3.3216	0.00044747	0.0617915
50813	COPS7A	12	6833150	6841041	41	10	740868	3.3185	0.00045251	0.0618759
57695	USP37	2	219314974	219433084	331	22	740868	3.317	0.00045487	0.0618759
145741	C2CD4A	15	62359176	62363116	11	5	740868	3.3086	0.00046874	0.0632903
144577	KICS2	12	64580098	64616076	75	20	740868	3.2869	0.00050655	0.0678926
3631	INPP4A	2	99061321	99207496	369	37	740868	3.281	0.00051712	0.0688034
6882	TAF11	6	34845555	34855908	36	13	740868	3.2778	0.00052315	0.0691013
3305	HSPA1L	6	31777396	31790093	46	23	740868	3.2739	0.00053034	0.069547
5627	PROS1	3	93591881	93692934	198	65	740868	3.2655	0.00054632	0.0709172
134549	SHROOM1	5	132157833	132166655	18	7	740868	3.2632	0.00055089	0.0709172
5980	REV3L	6	111620234	111804421	531	35	740868	3.2623	0.00055246	0.0709172
7745	ZKSCAN8	6	28109688	28127250	72	15	740868	3.2568	0.00056329	0.0718017
390598	SKOR1	15	68112042	68126498	49	13	740868	3.2435	0.00059028	0.0747196
51466	EVL	14	100485719	100610573	501	53	740868	3.2377	0.00060255	0.0757468
56142	PCDHA6	5	140207650	140391929	755	41	740868	3.2334	0.00061155	0.0758706
56136	PCDHA13	5	140261854	140391929	545	43	740868	3.2333	0.00061186	0.0758706
5699	PSMB10	16	67968407	67970780	5	2	740868	3.2298	0.00061928	0.0762719
55742	PARVA	11	12397988	12556903	702	108	740868	3.2238	0.00063246	0.0765395
56137	PCDHA12	5	140254931	140391929	570	41	740868	3.2234	0.00063342	0.0765395
493753	COA5	2	99215786	99224981	25	4	740868	3.2231	0.00063405	0.0765395
144097	SPINDOC	11	63580846	63595190	49	13	740868	3.2143	0.00065389	0.0784152
56144	PCDHA4	5	140186672	140391929	838	47	740868	3.1964	0.0006958	0.0828957
56138	PCDHA11	5	140247149	140391932	597	40	740868	3.1917	0.00070728	0.0837162
54969	HPF1	4	170650619	170679093	112	24	740868	3.1858	0.00072167	0.0839099
728819	C1GALT1C1L	2	43902292	43903461	8	4	740868	3.1846	0.00072481	0.0839099
4733	DRG1	22	31795539	31830172	133	32	740868	3.1837	0.00072702	0.0839099
283726	SAXO2	15	82555152	82577271	85	27	740868	3.1836	0.00072733	0.0839099
1593	CYP27A1	2	219646472	219680016	114	12	740868	3.1729	0.00075463	0.0860293
388722	C1orf53	1	197871682	197876497	12	8	740868	3.1727	0.00075514	0.0860293
84457	PHYHIPL	10	60936348	61007815	233	27	740868	3.165	0.0007754	0.0877888
7718	ZNF165	6	28048482	28057341	37	10	740868	3.1597	0.00078954	0.0888379
9846	GAB2	11	77926336	78128868	758	21	740868	3.1524	0.00080977	0.0905551
6949	TCOF1	5	149737202	149779871	121	29	740868	3.15	0.00081631	0.0906805
3303	HSPA1A	6	31782952	31785719	5	2	740868	3.1476	0.00082318	0.0906805
113235	SLC46A1	17	26721661	26733230	23	8	740868	3.1459	0.00082779	0.0906805
115761	ARL11	13	50202435	50208008	28	15	740868	3.1449	0.00083079	0.0906805
23408	SIRT5	6	13574506	13615390	89	21	740868	3.128	0.00088003	0.0949646
79947	DHDDS	1	26758773	26797797	101	32	740868	3.1278	0.00088046	0.0949646
64506	CPEB1	15	83211948	83316762	472	49	740868	3.1254	0.00088777	0.0951898
1201	CLN3	16	28488600	28505897	28	7	740868	3.1189	0.0009075	0.0967363
23294	ANKS1A	6	34857038	35085802	926	72	740868	3.1171	0.00091322	0.0967801
10960	LMAN2	5	176758563	176778885	48	12	740868	3.1092	0.00093812	0.0988442
9779	TBC1D5	3	17198654	17784240	1888	36	740868	3.1071	0.00094454	0.0989487
51077	FCF1	14	75179817	75205323	77	25	740868	3.1019	0.00096134	0.100133
3776	KCNK2	1	215178885	215410436	1030	58	740868	3.099	0.00097097	0.10037
58986	PGAP6	16	420776	431950	84	13	740868	3.0979	0.00097463	0.10037
56143	PCDHA5	5	140201361	140391929	774	39	740868	3.0792	0.0010376	0.105141
662	BNIP1	5	172571445	172591390	73	19	740868	3.0786	0.0010399	0.105141
56140	PCDHA8	5	140220907	140391929	711	40	740868	3.0769	0.001046	0.105141
10886	NPFFR2	4	72897521	73013918	606	19	740868	3.0765	0.0010473	0.105141
83594	NUDT12	5	102884556	102898493	60	14	740868	3.0745	0.0010542	0.105141
2011	MARK2	11	63606400	63678492	198	31	740868	3.0716	0.0010644	0.105141
64174	DPEP2	16	68021293	68034493	44	14	740868	3.0713	0.0010656	0.105141
56252	YLPM1	14	75230025	75304013	227	29	740868	3.0709	0.0010671	0.105141
51650	MRPS33	7	140705961	140714781	24	8	740868	3.063	0.0010957	0.10645
25972	UNC50	2	99225032	99234978	31	11	740868	3.0628	0.0010963	0.10645
10554	AGPAT1	6	32135983	32145888	26	12	740868	3.0624	0.0010979	0.10645
199675	MCEMP1	19	7741943	7744719	16	10	740868	3.0606	0.0011045	0.106523
9002	F2RL3	19	16999826	17002830	10	5	740868	3.0562	0.0011207	0.106601
200895	DHFR2	3	93776766	93782233	15	9	740868	3.0554	0.0011236	0.106601
56147	PCDHA1	5	140165876	140391929	936	47	740868	3.0551	0.0011251	0.106601
1366	CLDN7	17	7163222	7166863	10	6	740868	3.0541	0.0011287	0.106601
56139	PCDHA10	5	140235634	140391929	661	38	740868	3.0305	0.0012209	0.114322
2637	GBX2	2	237074307	237076652	4	2	740868	3.0299	0.001223	0.114322
7473	WNT3	17	44839872	44896126	171	41	740868	3.0273	0.0012337	0.114734
55911	APOBR	16	28505970	28510291	9	3	740868	3.0241	0.0012468	0.115067
26353	HSPB8	12	119616595	119632551	59	14	740868	3.0234	0.0012499	0.115067
353345	GPR141	7	37570212	37781888	847	47	740868	3.0202	0.0012629	0.115679
9752	PCDHA9	5	140227357	140391929	695	38	740868	3.0172	0.0012756	0.115734
7407	VARS1	6	31745295	31763712	56	25	740868	3.0144	0.0012873	0.115734
56145	PCDHA3	5	140180783	140391929	877	43	740868	3.0142	0.0012881	0.115734
9256	TSPOAP1	17	56378588	56406152	102	22	740868	3.014	0.0012889	0.115734
79955	PDZD7	10	102767440	102790914	103	37	740868	3.0041	0.0013318	0.118998
196996	GRAMD2A	15	72452147	72490136	101	29	740868	3.0026	0.0013383	0.118998
10615	SPAG5	17	26904583	26926056	35	26	740868	2.9975	0.001361	0.120429
51009	DERL2	17	5377582	5389520	48	17	740868	2.9936	0.0013786	0.121397
56923	NMUR2	5	151771102	151784840	83	6	740868	2.9896	0.0013968	0.121971
51128	SAR1B	5	133936839	133968533	70	32	740868	2.9892	0.0013985	0.121971
23564	DDAH2	6	31694817	31698039	12	7	740868	2.9854	0.0014161	0.12259
56146	PCDHA2	5	140174444	140391929	903	44	740868	2.9828	0.0014281	0.12259
83697	SLC4A9	5	139739787	139754722	34	15	740868	2.9827	0.0014286	0.12259
80010	RMI1	9	86595321	86618989	72	21	740868	2.9819	0.0014325	0.12259
9701	PPP6R2	22	50781746	50883519	513	41	740868	2.9661	0.0015081	0.128456
4724	NDUFS4	5	52856464	52979171	485	35	740868	2.964	0.0015183	0.128724
8079	MLF2	12	6857158	6862721	29	8	740868	2.9617	0.0015299	0.128822
56141	PCDHA7	5	140213969	140391929	728	39	740868	2.9609	0.0015336	0.128822
5315	PKM	15	72491370	72523901	93	26	740868	2.9551	0.0015626	0.130656
4134	MAP4	3	47892180	48130769	476	44	740868	2.9516	0.0015806	0.131558
646	BNC1	15	83924655	83953468	69	20	740868	2.9417	0.0016321	0.135088
253512	SLC25A30	13	45960520	45992549	113	27	740868	2.9392	0.0016455	0.135088
10861	SLC26A1	4	972861	987228	59	23	740868	2.936	0.0016626	0.135088
120892	LRRK2	12	40618813	40763087	675	50	740868	2.9349	0.0016682	0.135088
1058	CENPA	2	27008857	27023935	55	7	740868	2.9348	0.0016686	0.135088
344807	CD200R1L	3	112534556	112564797	141	22	740868	2.9338	0.0016741	0.135088
80737	VWA7	6	31733178	31745108	58	23	740868	2.9334	0.0016763	0.135088
117247	SLC16A10	6	111408728	111544608	373	40	740868	2.9323	0.0016823	0.135088
2799	GNS	12	65107222	65153226	112	20	740868	2.9278	0.0017068	0.136454
84292	WDR83	19	12777618	12786646	23	12	740868	2.9258	0.0017178	0.136623
267012	DAOA	13	106118216	106143383	151	17	740868	2.9241	0.0017271	0.136623
27335	EIF3K	19	39109722	39127595	33	12	740868	2.9234	0.0017314	0.136623
283208	P4HA3	11	73958532	74022699	306	33	740868	2.9196	0.0017526	0.1377
94025	MUC16	19	8959516	9092018	678	62	740868	2.9142	0.0017831	0.139495
4948	OCA2	15	28000021	28344483	1311	65	740868	2.9104	0.0018048	0.140149
2794	GNL1	6	30509154	30525371	47	21	740868	2.9089	0.0018135	0.140149
9321	TRIP11	14	92434243	92506484	273	29	740868	2.9074	0.0018222	0.140149
3921	RPSA	3	39448204	39454033	38	6	740868	2.9063	0.0018287	0.140149
127281	PRXL2B	1	2517899	2522908	23	12	740868	2.9061	0.0018299	0.140149
57492	ARID1B	6	157098980	157531913	1563	144	740868	2.9005	0.0018628	0.141738
8497	PPFIA4	1	202995649	203047864	236	42	740868	2.8999	0.0018662	0.141738
29800	ZDHHC1	16	67428322	67450339	65	20	740868	2.8934	0.0019053	0.143732
4795	NFKBIL1	6	31514628	31526606	90	27	740868	2.8925	0.0019108	0.143732
63973	NEUROG2	4	113434672	113437328	6	4	740868	2.8913	0.0019181	0.143732
11273	ATXN2L	16	28834369	28848558	37	6	740868	2.8904	0.001924	0.143732
79003	MIS12	17	5389694	5394134	29	9	740868	2.8839	0.0019636	0.14572
8341	H2BC15	6	27805544	27821533	60	19	740868	2.8835	0.0019666	0.14572
821	CANX	5	179125019	179158642	123	25	740868	2.8768	0.0020085	0.148222
85509	MBD3L1	19	8943074	8954016	29	11	740868	2.8709	0.0020467	0.150242
3815	KIT	4	55524095	55606881	281	43	740868	2.8673	0.0020696	0.150242
3626	INHBC	12	57828543	57844609	43	11	740868	2.8663	0.0020763	0.150242
80034	CSRNP3	2	166326157	166545917	729	77	740868	2.8656	0.0020814	0.150242
55531	ELMOD1	11	107461817	107537505	312	49	740868	2.8637	0.0020937	0.150242
10380	BPNT1	1	220230824	220263249	112	33	740868	2.8628	0.0020995	0.150242
3291	HSD11B2	16	67465036	67471456	19	9	740868	2.8628	0.0020997	0.150242
92292	GLYATL1	11	58695102	58724543	119	18	740868	2.8625	0.0021018	0.150242
54873	PALMD	1	100111431	100160097	224	34	740868	2.8492	0.0021912	0.155574
90956	ADCK2	7	140372730	140395745	60	13	740868	2.8477	0.0022017	0.155574
8356	H3C12	6	27858093	27858570	1	1	740868	2.8477	0.002202	0.155574
4237	MFAP2	1	17300997	17308081	25	7	740868	2.845	0.0022207	0.156289
6568	SLC17A1	6	25783125	25832287	253	31	740868	2.838	0.0022697	0.158293
25841	ABTB2	11	34172534	34379555	968	157	740868	2.8373	0.0022745	0.158293
875	CBS	21	44473301	44496472	111	25	740868	2.8328	0.0023072	0.158293
23316	CUX2	12	111471828	111788358	727	85	740868	2.8325	0.0023092	0.158293
100507436	MICA	6	31367561	31383090	284	36	740868	2.8317	0.0023147	0.158293
54977	SLC25A38	3	39424815	39438819	63	14	740868	2.8316	0.002316	0.158293
153222	CREBRF	5	172483355	172566291	269	24	740868	2.8309	0.0023211	0.158293
3382	ICA1	7	8152814	8302242	829	105	740868	2.8307	0.0023226	0.158293
64768	IPPK	9	95375466	95432547	221	34	740868	2.8287	0.0023367	0.158293
23598	PATZ1	22	31721790	31742249	57	21	740868	2.8282	0.0023403	0.158293
79838	TMC5	16	19421839	19510435	477	48	740868	2.8276	0.0023447	0.158293
9451	EIF2AK3	2	88856259	88927094	114	26	740868	2.8257	0.0023587	0.158311
1893	ECM1	1	150480487	150486265	20	9	740868	2.825	0.002364	0.158311
148156	ZNF558	19	8920250	8942972	93	18	740868	2.8235	0.0023749	0.158311
100506422	LINC03106	9	26066673	26118406	246	48	740868	2.8229	0.0023797	0.158311
6844	VAMP2	17	8062465	8066293	14	8	740868	2.8208	0.0023952	0.158763
8291	DYSF	2	71680347	71913895	1135	132	740868	2.8187	0.0024111	0.159126
116461	TSEN15	1	184020811	184043346	152	9	740868	2.8174	0.0024207	0.159126
116986	AGAP2	12	58117544	58135984	53	18	740868	2.8159	0.0024322	0.159126
4780	NFE2L2	2	178095031	178129859	104	27	740868	2.8154	0.0024356	0.159126
9117	SEC22C	3	42589459	42642572	190	31	740868	2.8127	0.0024563	0.159905
2568	GABRP	5	170210723	170241051	149	29	740868	2.8004	0.0025519	0.165537
2256	FGF11	17	7341784	7348256	18	7	740868	2.7978	0.0025722	0.166263
3172	HNF4A	20	42984441	43061485	343	68	740868	2.7947	0.0025973	0.167292
4300	MLLT3	9	20341663	20622514	900	110	740868	2.791	0.0026275	0.168641
81697	OR2B2	6	27878963	27880174	5	3	740868	2.7881	0.0026511	0.169559
170384	FUT11	10	75531830	75535977	11	6	740868	2.7853	0.0026743	0.170445
123228	SENP8	15	72406599	72433311	70	16	740868	2.7838	0.0026863	0.170613
4163	MCC	5	112357796	112824527	2539	88	740868	2.7788	0.0027283	0.172679
81831	NETO2	16	47115431	47177936	88	18	740868	2.7767	0.002746	0.172909
4969	OGN	9	95146249	95166976	61	10	740868	2.7752	0.0027581	0.172909
9862	MED24	17	38175350	38210889	125	25	740868	2.775	0.0027604	0.172909
445577	FAM120A2P	9	96080481	96108696	155	31	740868	2.7681	0.0028192	0.175988
2098	ESD	13	47345391	47371423	70	16	740868	2.7618	0.0028742	0.178448
1394	CRHR1	17	43697710	43913194	1284	17	740868	2.7613	0.0028782	0.178448
56965	PARP6	15	72533522	72564885	96	19	740868	2.7572	0.0029149	0.180111
91749	MFSD4B	6	111580482	111590263	38	15	740868	2.7554	0.002931	0.180494
150864	FAM117B	2	203499901	203634480	322	51	740868	2.7523	0.0029586	0.181063
56259	CTNNBL1	20	36322357	36500531	546	44	740868	2.7522	0.0029601	0.181063
23438	HARS2	5	140071011	140078903	25	9	740868	2.7481	0.0029967	0.182688
10758	TRAF3IP2	6	111876581	111927477	202	33	740868	2.7448	0.0030278	0.183969
101928726	NA	5	176532822	176548835	60	13	740868	2.7418	0.0030549	0.184271
7284	TUFM	16	28853732	28857729	9	3	740868	2.7417	0.0030565	0.184271
10048	RANBP9	6	13621730	13711796	202	46	740868	2.7409	0.0030631	0.184271
177	AGER	6	32148745	32152099	19	10	740868	2.738	0.0030904	0.185302
64848	YTHDC2	5	112849391	112930984	431	31	740868	2.7353	0.0031166	0.186098
7922	SLC39A7	6	33168603	33172214	12	8	740868	2.7338	0.0031301	0.186098
54859	ELP6	3	47537130	47555199	47	20	740868	2.7334	0.0031343	0.186098
27125	AFF4	5	132211071	132299354	309	24	740868	2.7315	0.0031526	0.186577
9960	USP3	15	63796710	63886839	360	34	740868	2.7268	0.0031976	0.188095
9038	TAAR5	6	132909731	132910877	6	4	740868	2.7267	0.0031989	0.188095
2935	GSPT1	16	11961985	12010519	182	32	740868	2.7211	0.0032528	0.190401
6305	SBF1	22	50883429	50913467	155	40	740868	2.7194	0.0032703	0.190401
6390	SDHB	1	17345217	17380665	149	19	740868	2.7187	0.0032768	0.190401
4649	MYO9A	15	72114632	72410440	767	36	740868	2.7184	0.0032799	0.190401
25970	SH2B1	16	28872939	28885534	24	6	740868	2.7099	0.0033647	0.194215
283248	RCOR2	11	63678693	63684407	15	6	740868	2.7097	0.0033669	0.194215
4901	NRL	14	24547902	24584223	94	33	740868	2.7082	0.0033824	0.194231
55937	APOM	6	31620187	31625987	26	13	740868	2.7075	0.00339	0.194231
54843	SYTL2	11	85405264	85522197	455	46	740868	2.7063	0.0034019	0.194231
55035	NOL8	9	95059640	95087876	83	14	740868	2.7055	0.0034098	0.194231
7126	TNFAIP1	17	26662548	26674035	27	12	740868	2.7004	0.0034629	0.196641
219869	OR10G8	11	123900330	123901265	6	3	740868	2.6984	0.0034833	0.197026
55844	PPP2R2D	10	133747957	133770054	64	12	740868	2.6977	0.0034913	0.197026
8312	AXIN1	16	337440	405244	450	46	740868	2.6951	0.0035184	0.197943
9374	PPT2	6	32121229	32131458	37	18	740868	2.6937	0.0035336	0.198154
51026	GOLT1B	12	21654699	21671337	96	19	740868	2.6927	0.0035439	0.198154
10458	BAIAP2	17	79008944	79091232	524	63	740868	2.6895	0.0035782	0.198375
10636	RGS14	5	176784704	176799599	29	9	740868	2.6895	0.0035784	0.198375
1973	EIF4A1	17	7476024	7482324	26	10	740868	2.6893	0.0035805	0.198375
181	AGRP	16	67516474	67517716	3	1	740868	2.6851	0.0036254	0.200254
5607	MAP2K5	15	67835021	68099455	903	52	740868	2.6839	0.0036389	0.200392
84251	SGIP1	1	66999066	67210768	948	35	740868	2.6827	0.0036511	0.200409
3611	ILK	11	6624938	6632105	37	7	740868	2.6818	0.0036612	0.200409
401541	CENPP	9	95087741	95377446	979	37	740868	2.678	0.0037033	0.202107
23219	FBXO28	1	224301789	224349749	220	27	740868	2.6758	0.0037274	0.202609
387032	ZKSCAN4	6	28212404	28227030	56	20	740868	2.6745	0.003742	0.202609
79719	AAGAB	15	67493013	67547536	149	19	740868	2.6739	0.0037488	0.202609
8682	PEA15	1	160175125	160185162	21	15	740868	2.6729	0.0037599	0.202609
25782	RAB3GAP2	1	220321610	220445843	364	39	740868	2.672	0.0037703	0.202609
4905	NSF	17	44668035	44834830	112	17	740868	2.6697	0.0037964	0.202609
60412	EXOC4	7	132937823	133750514	2484	77	740868	2.6683	0.0038123	0.202609
3804	KIR2DL3	19	55249974	55264504	7	2	740868	2.668	0.003815	0.202609
58525	WIZ	19	15532318	15560767	46	23	740868	2.6673	0.0038227	0.202609
27097	TAF5L	1	229728858	229761794	105	17	740868	2.6663	0.0038344	0.202609
80741	LY6G5C	6	31644461	31648150	16	7	740868	2.6662	0.0038359	0.202609
27180	SIGLEC9	19	51628137	51639520	38	17	740868	2.6649	0.0038501	0.202609
246744	STH	17	44076616	44077060	1	1	740868	2.6643	0.003857	0.202609
4185	ADAM11	17	42836405	42859214	83	17	740868	2.6599	0.0039077	0.204472
51714	SELENOT	3	150321066	150348234	79	22	740868	2.6593	0.0039149	0.204472
112950	MED8	1	43849579	43855483	8	5	740868	2.6574	0.003937	0.205039
91445	RNF185	22	31556138	31603005	194	34	740868	2.6565	0.0039483	0.205042
3915	LAMC1	1	182992572	183114727	592	18	740868	2.6543	0.0039735	0.20506
55929	DMAP1	1	44679104	44686351	22	11	740868	2.6539	0.0039784	0.20506
84076	TKTL2	4	164392245	164395047	4	2	740868	2.6531	0.0039879	0.20506
6462	SHBG	17	7517382	7536700	63	22	740868	2.6525	0.0039947	0.20506
10668	CGRRF1	14	54976587	55005334	99	19	740868	2.6517	0.0040049	0.20506
64978	MRPL38	17	73894724	73901181	27	13	740868	2.6485	0.0040427	0.206416
3550	IK	5	140027384	140042065	50	15	740868	2.6466	0.0040655	0.207
5787	PTPRB	12	70910630	71031220	635	85	740868	2.6401	0.0041439	0.210404
340784	HMX3	10	124895567	124897247	4	2	740868	2.639	0.0041579	0.210528
307	ANXA4	2	69947946	70053596	419	35	740868	2.6367	0.0041853	0.211329
201176	ARHGAP27	17	43471268	43510282	156	18	740868	2.6345	0.0042129	0.211786
56244	BTNL2	6	32362513	32374900	374	13	740868	2.6341	0.0042176	0.211786
51129	ANGPTL4	19	8429011	8439257	24	9	740868	2.632	0.0042445	0.212552
2887	GRB10	7	50657760	50861159	918	49	740868	2.6277	0.0042979	0.214521
80829	ZFP91	11	58346587	58389023	131	31	740868	2.626	0.0043198	0.214521
81502	HM13	20	30102213	30158178	162	15	740868	2.6253	0.0043286	0.214521
57713	SFMBT2	10	7200586	7453448	1287	108	740868	2.6251	0.0043309	0.214521
919	CD247	1	167399877	167487847	417	83	740868	2.6233	0.0043542	0.21509
6208	RPS14	5	149822712	149829351	34	5	740868	2.6195	0.0044031	0.21655
23098	SARM1	17	26698683	26728062	81	15	740868	2.6191	0.0044075	0.21655
80025	PANK2	20	3869486	3904538	143	28	740868	2.6166	0.0044403	0.217402
8340	H2BC13	6	27775257	27775709	2	1	740868	2.616	0.0044487	0.217402
5097	PCDH1	5	141232655	141258361	67	30	740868	2.6137	0.0044782	0.217444
9489	PGS1	17	76374705	76420740	239	26	740868	2.6121	0.004499	0.217444
130271	PLEKHH2	2	43864439	43995126	670	54	740868	2.6118	0.0045033	0.217444
5717	PSMD11	17	30771481	30810337	77	27	740868	2.6114	0.0045086	0.217444
3985	LIMK2	22	31608225	31676066	218	43	740868	2.6114	0.0045092	0.217444
84261	FBXW9	19	12799730	12807649	27	3	740868	2.6075	0.0045607	0.219347
30000	TNPO2	19	12810008	12834838	77	9	740868	2.6043	0.0046036	0.220827
6579	SLCO1A2	12	21417534	21548371	695	48	740868	2.6021	0.0046331	0.221659
27006	FGF22	19	639901	643824	25	9	740868	2.6006	0.0046525	0.221668
23199	GSE1	16	85203152	85709812	2669	344	740868	2.6003	0.0046576	0.221668
162540	SPPL2C	17	43922256	43924438	23	5	740868	2.5977	0.0046931	0.222358
7429	VIL1	2	219283838	219314248	71	16	740868	2.5974	0.0046965	0.222358
9870	AREL1	14	75127955	75179807	158	31	740868	2.5888	0.0048156	0.227406
2769	GNA15	19	3136191	3163766	214	33	740868	2.5874	0.0048354	0.227751
9794	MAML1	5	179159833	179208035	219	38	740868	2.5842	0.00488	0.229259
1152	CKB	14	103985995	103989196	8	3	740868	2.5804	0.0049336	0.231182
9114	ATP6V0D1	16	67471917	67515089	105	31	740868	2.5794	0.0049485	0.231285
92140	MTDH	8	98656375	98742488	310	37	740868	2.576	0.004998	0.233001
200185	KRTCAP2	1	155141884	155151331	24	9	740868	2.5748	0.0050153	0.233211
53346	TM6SF1	15	83776301	83806111	63	19	740868	2.5706	0.0050764	0.233318
283985	FADS6	17	72873451	72889737	57	15	740868	2.5706	0.0050767	0.233318
51188	SS18L2	3	42623332	42636490	49	14	740868	2.5698	0.005088	0.233318
285601	GPR150	5	94955980	94957284	4	2	740868	2.5696	0.0050906	0.233318
26156	RSL1D1	16	11928053	11945442	68	18	740868	2.5695	0.0050925	0.233318
10919	EHMT2	6	31847536	31865464	78	34	740868	2.5692	0.0050964	0.233318
388381	SPMAP1	17	36991341	36997642	14	4	740868	2.5685	0.0051072	0.233318
4145	MATK	19	3777967	3801810	91	28	740868	2.5671	0.0051279	0.233678
54978	SLC35F6	2	26987131	27004099	44	12	740868	2.5659	0.0051462	0.233928
2922	GRP	18	56887400	56898003	56	8	740868	2.5642	0.00517	0.234214
65012	SLC26A10P	12	58013693	58019934	18	11	740868	2.5631	0.0051869	0.234214
819	CAMLG	5	134074170	134087850	36	14	740868	2.5627	0.0051936	0.234214
10755	GIPC1	19	14588571	14606961	92	21	740868	2.562	0.0052039	0.234214
3304	HSPA1B	6	31789964	31798032	23	14	740868	2.5588	0.0052515	0.235774
149281	NTMT2	1	170115188	170136923	90	22	740868	2.5577	0.0052676	0.235916
8359	H4C1	6	26021907	26022278	2	1	740868	2.5552	0.0053066	0.23708
10335	IRAG1	11	10594638	10715535	530	54	740868	2.5525	0.0053481	0.237434
9816	URB2	1	229761981	229795946	91	16	740868	2.5523	0.0053506	0.237434
6515	SLC2A3	12	8071824	8088895	61	20	740868	2.5521	0.0053536	0.237434
1192	CLIC1	6	31698358	31705095	25	16	740868	2.5487	0.0054065	0.23834
4137	MAPT	17	43971702	44105700	861	9	740868	2.5476	0.0054231	0.23834
3931	LCAT	16	67973787	67978656	12	5	740868	2.5467	0.0054373	0.23834
9570	GOSR2	17	45000486	45044366	165	21	740868	2.5466	0.0054382	0.23834
126306	JSRP1	19	2252250	2256422	19	8	740868	2.5466	0.0054394	0.23834
54465	ETAA1	2	67624442	67637540	58	14	740868	2.5446	0.0054699	0.239102
116511	MAS1L	6	29454543	29455679	9	5	740868	2.5417	0.0055153	0.240218
27148	STK36	2	219536749	219567440	108	16	740868	2.5413	0.0055218	0.240218
55282	LRRC36	16	67360747	67419109	174	28	740868	2.5395	0.0055505	0.240406
55741	EDEM2	20	33703160	33735161	156	20	740868	2.5394	0.0055525	0.240406
3337	DNAJB1	19	14625581	14640087	45	14	740868	2.5363	0.0056014	0.241678
115708	TRMT61A	14	103995509	104003410	29	8	740868	2.5359	0.0056084	0.241678
8332	H2AC16	6	27833107	27833576	4	2	740868	2.5338	0.0056417	0.24254
55432	YOD1	1	207217194	207226325	27	11	740868	2.5305	0.0056955	0.24376
55699	IARS2	1	220267455	220321383	189	37	740868	2.5303	0.0056975	0.24376
55789	DEPDC1B	5	59892739	59995993	305	33	740868	2.5296	0.0057102	0.24376
7422	VEGFA	6	43737946	43754224	63	20	740868	2.5272	0.0057496	0.244868
28232	SLCO3A1	15	92396938	92715665	1498	127	740868	2.5232	0.0058148	0.247068
79143	MBOAT7	19	54677106	54693733	86	27	740868	2.5215	0.0058427	0.247676
23090	ZNF423	16	49524515	49891830	1516	161	740868	2.5195	0.0058768	0.248544
9632	SEC24C	10	75504039	75531933	62	17	740868	2.5186	0.0058909	0.248563
152137	CCDC50	3	191046874	191116459	395	29	740868	2.515	0.0059514	0.249273
1196	CLK2	1	155232659	155243305	20	8	740868	2.515	0.0059516	0.249273
246213	SLC17A8	12	100750857	100815837	266	46	740868	2.5149	0.0059539	0.249273
1901	S1PR1	1	101702305	101707076	13	6	740868	2.5142	0.005966	0.249273
8520	HAT1	2	172778935	172848600	216	41	740868	2.5136	0.0059761	0.249273
2307	FOXS1	20	30432103	30433420	3	2	740868	2.5115	0.0060111	0.249591
56901	NDUFA4L2	12	57628686	57634545	9	5	740868	2.5113	0.0060152	0.249591
90233	ZNF551	19	58193337	58201179	19	9	740868	2.5107	0.0060248	0.249591
83939	EIF2A	3	150264465	150303803	139	26	740868	2.5057	0.0061106	0.252124
50810	HDGFL3	15	83806804	83876770	207	30	740868	2.5055	0.0061136	0.252124
23287	AGTPBP1	9	88161454	88356944	765	25	740868	2.5013	0.0061876	0.254599
23190	UBXN4	2	136499189	136542633	101	12	740868	2.4973	0.0062579	0.256912
439	GET3	19	12848306	12859137	14	8	740868	2.4952	0.0062951	0.257859
22930	RAB3GAP1	2	135809835	135928280	229	23	740868	2.4943	0.0063098	0.257881
407977	TNFSF12-TNFSF13	17	7452375	7464925	58	17	740868	2.4908	0.0063722	0.259849
8886	DDX18	2	118572255	118589953	74	19	740868	2.4895	0.0063967	0.259917
286204	CRB2	9	126118448	126141034	121	30	740868	2.4892	0.0064024	0.259917
55374	TMCO6	5	140019012	140024989	25	8	740868	2.4851	0.0064758	0.262241
664	BNIP3	10	133781204	133795435	44	12	740868	2.4844	0.0064884	0.262241
4833	NME4	16	446752	450754	28	6	740868	2.4832	0.00651	0.262532
80174	DBF4B	17	42785976	42829637	144	40	740868	2.4809	0.0065529	0.263678
147007	TMEM199	17	26684687	26689089	11	7	740868	2.4789	0.0065899	0.264583
130589	GALM	2	38893052	38961909	327	41	740868	2.4756	0.0066505	0.266429
84267	QNG1	9	86553226	86571665	67	24	740868	2.4711	0.0067349	0.269058
10294	DNAJA2	16	46989274	47007625	24	11	740868	2.4701	0.0067542	0.269058
1950	EGF	4	110834040	110934118	371	37	740868	2.4697	0.0067604	0.269058
84969	TOX2	20	42543492	42698256	623	95	740868	2.4682	0.0067893	0.26962
8660	IRS2	13	110406184	110438914	132	25	740868	2.4652	0.0068469	0.270601
1195	CLK1	2	201717732	201729467	34	14	740868	2.4652	0.0068478	0.270601
51763	INPP5K	17	1397869	1420182	114	21	740868	2.4642	0.0068669	0.270601
388276	LINC02911	16	52060264	52107847	201	36	740868	2.4638	0.0068734	0.270601
7940	LST1	6	31553956	31556686	20	13	740868	2.4625	0.0068995	0.270709
375743	PTAR1	9	72324438	72374916	147	32	740868	2.4613	0.0069213	0.270709
63970	TP53AIP1	11	128804627	128813294	51	22	740868	2.4602	0.006943	0.270709
7253	TSHR	14	81421333	81612646	1079	78	740868	2.4601	0.0069453	0.270709
114134	SLC2A13	12	40148823	40499847	1238	83	740868	2.4598	0.0069504	0.270709
64149	C17orf75	17	30655460	30677066	38	17	740868	2.4547	0.0070495	0.273165
4718	NDUFC2	11	77779393	77791265	53	13	740868	2.4541	0.0070618	0.273165
81533	ITFG1	16	47188302	47495018	453	38	740868	2.4539	0.0070653	0.273165
968	CD68	17	7482805	7485429	8	4	740868	2.4535	0.0070734	0.273165
22937	SCAP	3	47455184	47517603	107	32	740868	2.4506	0.0071316	0.274739
26246	OR2L2	1	248201474	248202607	6	4	740868	2.4499	0.0071443	0.274739
9100	USP10	16	84733555	84813528	534	40	740868	2.4467	0.0072078	0.275334
57819	LSM2	6	31765169	31774761	42	20	740868	2.4458	0.0072256	0.275334
161502	CFAP161	15	81391749	81441516	212	23	740868	2.4458	0.0072263	0.275334
25796	PGLS	19	17622278	17632097	46	12	740868	2.4455	0.0072317	0.275334
7079	TIMP4	3	12194568	12200851	29	13	740868	2.4443	0.0072566	0.275334
10956	OS9	12	58087738	58115340	93	18	740868	2.4443	0.0072572	0.275334
146664	MGAT5B	17	74864798	74946472	587	61	740868	2.4439	0.0072655	0.275334
51673	TPPP3	16	67423710	67427449	9	3	740868	2.4407	0.00733	0.275355
5257	PHKB	16	47495047	47735434	340	40	740868	2.4404	0.0073362	0.275355
8985	PLOD3	7	100849258	100861011	45	20	740868	2.4401	0.0073424	0.275355
4439	MSH5	6	31707725	31730455	98	31	740868	2.4398	0.0073474	0.275355
80736	SLC44A4	6	31830969	31846823	88	21	740868	2.4389	0.007367	0.275355
284058	KANSL1	17	44107282	44302740	1054	12	740868	2.4386	0.0073716	0.275355
166815	TIGD2	4	90032651	90036734	16	6	740868	2.4386	0.0073718	0.275355
7024	TFCP2	12	51487539	51566926	306	30	740868	2.4372	0.0074	0.275843
1008	CDH10	5	24487209	24645085	806	50	740868	2.4363	0.0074186	0.275892
54887	BLTP3A	6	34759794	34845291	418	29	740868	2.4355	0.0074347	0.275892
648044	NA	19	12798791	12799230	3	2	740868	2.4348	0.0074491	0.275892
166655	TRIM60	4	165953151	165962896	46	9	740868	2.4339	0.0074696	0.275892
284615	ANKRD34A	1	145470508	145475647	1	1	740868	2.4335	0.007477	0.275892
83871	RAB34	17	27041299	27045286	5	3	740868	2.4309	0.0075314	0.276255
100861437	NA	17	27043011	27044908	5	3	740868	2.4309	0.0075314	0.276255
673	BRAF	7	140415749	140624564	548	33	740868	2.4308	0.0075323	0.276255
8365	H4C8	6	26281278	26285844	24	10	740868	2.4288	0.0075749	0.277033
200523	SPMIP9	2	88824115	88829196	20	7	740868	2.4283	0.0075847	0.277033
345651	ACTBL2	5	56775843	56778636	10	6	740868	2.4271	0.0076091	0.277033
23415	KCNH4	17	40308910	40333296	65	24	740868	2.4269	0.0076143	0.277033
7142	TNP2	16	11361714	11363160	8	4	740868	2.4222	0.0077139	0.279928
51172	NAGPA	16	5074845	5083942	41	12	740868	2.4217	0.0077246	0.279928
11113	CIT	12	120123595	120315095	639	51	740868	2.4184	0.0077946	0.281905
27091	CACNG5	17	64831235	64881941	266	52	740868	2.4174	0.0078158	0.282112
158219	TTC39B	9	15170842	15307358	730	87	740868	2.416	0.0078471	0.282167
3376	IARS1	9	94972489	95056038	269	22	740868	2.4159	0.0078483	0.282167
51350	KRT76	12	53161939	53171129	47	14	740868	2.4138	0.0078935	0.282677
9842	PLEKHM1	17	43513266	43568146	192	15	740868	2.4138	0.0078935	0.282677
2529	FUT7	9	139924626	139927292	13	5	740868	2.4105	0.0079643	0.284243
7075	TIE1	1	43766566	43788781	42	8	740868	2.4104	0.0079684	0.284243
55659	ZNF416	19	58082387	58090266	24	14	740868	2.4095	0.0079872	0.284357
4172	MCM3	6	52128812	52149679	97	22	740868	2.4079	0.0080221	0.284502
6954	TCP11	6	35085848	35109187	112	19	740868	2.4079	0.0080225	0.284502
64499	TPSB2	16	1278336	1280185	7	3	740868	2.4051	0.0080847	0.285275
83985	SPNS1	16	28986028	28995869	31	12	740868	2.4045	0.0080963	0.285275
10475	TRIM38	6	25962917	25987557	110	37	740868	2.4045	0.0080974	0.285275
3360	HTR4	5	147830595	148034090	725	62	740868	2.4041	0.0081069	0.285275
648791	PPP1R3G	6	5085720	5087455	8	3	740868	2.3994	0.0082115	0.288399
23659	PLA2G15	16	68279240	68294965	53	14	740868	2.3951	0.008309	0.291262
1776	DNASE1L3	3	58178353	58196730	87	20	740868	2.3939	0.0083342	0.291494
27242	TNFRSF21	6	47199263	47277683	271	53	740868	2.3934	0.0083476	0.291494
55359	STYK1	12	10771538	10826917	221	22	740868	2.3923	0.0083714	0.291766
8935	SKAP2	7	26697397	27034862	1156	34	740868	2.3845	0.0085512	0.297464
3396	MRPL58	17	73008760	73017356	38	8	740868	2.3833	0.0085799	0.297894
57522	SRGAP1	12	64238276	64541643	853	112	740868	2.3804	0.0086467	0.299305
9349	RPL23	17	37006321	37010053	9	5	740868	2.3798	0.0086603	0.299305
7746	ZSCAN9	6	28193029	28201265	51	19	740868	2.3783	0.0086973	0.299305
7124	TNF	6	31543344	31546113	8	4	740868	2.3782	0.0086982	0.299305
3203	HOXA6	7	27185202	27187393	6	4	740868	2.378	0.0087043	0.299305
79025	FNDC11	20	62184373	62188061	14	7	740868	2.3762	0.0087467	0.299305
219874	OR6T1	11	123813574	123814545	10	3	740868	2.3748	0.0087799	0.299305
113791	PIK3IP1	22	31677579	31688833	45	14	740868	2.3744	0.0087893	0.299305
84083	ZRANB3	2	135954539	136288806	712	19	740868	2.3741	0.0087961	0.299305
7178	TPT1	13	45911005	45915505	16	6	740868	2.374	0.0087976	0.299305
84839	RAX2	19	3769087	3772219	16	7	740868	2.3734	0.0088137	0.299305
60684	TRAPPC11	4	184580420	184634747	268	25	740868	2.373	0.0088215	0.299305
4580	MTX1	1	155178490	155183625	11	6	740868	2.3725	0.008834	0.299305
56970	ATXN7L3	17	42269173	42275747	23	14	740868	2.3697	0.008902	0.301049
3839	KPNA3	13	50273443	50367057	405	40	740868	2.3688	0.0089237	0.301094
6334	SCN8A	12	51984050	52206648	694	59	740868	2.3679	0.0089449	0.301094
135152	B3GAT2	6	71566914	71667101	500	65	740868	2.3673	0.0089592	0.301094
2709	GJB5	1	35220648	35224113	16	9	740868	2.3669	0.0089694	0.301094
1750	DLX6	7	96635290	96640352	11	6	740868	2.3644	0.0090292	0.302545
79258	MMEL1	1	2522078	2564499	229	20	740868	2.3635	0.0090523	0.302762
90268	OTULIN	5	14664783	14699842	84	19	740868	2.3615	0.0090999	0.303797
401563	LINC02908	9	139921916	139931234	31	8	740868	2.3603	0.0091298	0.303991
22864	R3HDM2	12	57647547	57824782	384	31	740868	2.3597	0.0091454	0.303991
9242	MSC	8	72753777	72756731	12	6	740868	2.3583	0.0091788	0.303991
338328	GPIHBP1	8	144295068	144299044	26	10	740868	2.3582	0.0091808	0.303991
51141	INSIG2	2	118846033	118867604	68	26	740868	2.3562	0.0092327	0.303991
219681	ARMC3	10	23216954	23327452	444	53	740868	2.3561	0.009234	0.303991
1371	CPOX	3	98296677	98312470	78	18	740868	2.3558	0.0092402	0.303991
7029	TFDP2	3	141663270	141868386	892	27	740868	2.3557	0.0092444	0.303991
94026	POM121L2	6	27276842	27280011	24	13	740868	2.3546	0.0092704	0.303991
9284	NPIPA1	16	15027316	15045931	5	3	740868	2.3546	0.0092725	0.303991
2569	GABRR1	6	89887223	89941007	320	39	740868	2.3525	0.0093233	0.304835
9456	HOMER1	5	78669647	78809659	524	45	740868	2.3515	0.0093478	0.304835
57020	VPS35L	16	19566737	19712485	777	58	740868	2.3515	0.0093484	0.304835
158038	LINGO2	9	27948084	29212998	7020	258	740868	2.3491	0.00941	0.305206
4502	MT2A	16	56642478	56643409	5	3	740868	2.3486	0.0094211	0.305206
11262	SP140	2	231090445	231177930	374	44	740868	2.3484	0.0094276	0.305206
3783	KCNN4	19	44270685	44286269	68	22	740868	2.3478	0.0094417	0.305206
219960	OR10Q1	11	57995354	57996390	4	2	740868	2.3478	0.0094435	0.305206
4958	OMD	9	95176527	95186836	29	12	740868	2.3468	0.0094674	0.305343
100532726	NDUFC2-KCTD14	11	77726761	77791265	388	29	740868	2.346	0.0094884	0.305343
219541	MED19	11	57471182	57479804	24	15	740868	2.3456	0.009498	0.305343
6605	SMARCE1	17	38781214	38805658	74	24	740868	2.3417	0.0095976	0.308002
5339	PLEC	8	144989321	145050913	243	23	740868	2.3392	0.0096617	0.308142
100506581	C16orf95	16	87336404	87351468	93	19	740868	2.3392	0.0096623	0.308142
3417	IDH1	2	209100951	209120478	57	16	740868	2.3391	0.0096641	0.308142
7738	ZNF184	6	27418521	27440897	122	14	740868	2.3386	0.0096779	0.308142
124512	METTL23	17	74722912	74729962	9	5	740868	2.3383	0.0096865	0.308142
4974	OMG	17	29621668	29624380	3	2	740868	2.3371	0.0097168	0.308449
598	BCL2L1	20	30252261	30311752	131	18	740868	2.3366	0.00973	0.308449
51194	IPO11	5	61699522	61924416	646	39	740868	2.3354	0.0097611	0.308898
10762	NUP50	22	45559726	45583892	125	17	740868	2.3336	0.0098075	0.309498
9455	HOMER2	15	83517729	83654905	493	63	740868	2.3328	0.0098284	0.309498
54829	ASPN	9	95218487	95244844	73	15	740868	2.3327	0.009831	0.309498
27037	TRMT2A	22	20099389	20104818	26	13	740868	2.3315	0.0098639	0.309999
65220	NADK	1	1682671	1711508	104	20	740868	2.3292	0.009924	0.311351
6439	SFTPB	2	85884440	85895864	31	16	740868	2.3283	0.0099469	0.311533
153527	ZMAT2	5	140078265	140086248	26	8	740868	2.3261	0.010006	0.312846
1010	CDH12	5	21750870	22853731	4420	169	740868	2.3244	0.010052	0.313007
10240	MRPS31	13	41303432	41345347	119	14	740868	2.3237	0.010071	0.313007
25930	PTPN23	3	47422383	47454931	58	15	740868	2.3232	0.010085	0.313007
91227	GGTLC2	22	22987059	22990368	13	5	740868	2.3229	0.010093	0.313007
26993	AKAP8L	19	15490859	15529916	97	15	740868	2.3227	0.010097	0.313007
9050	PSTPIP2	18	43563502	43652250	403	31	740868	2.3202	0.010166	0.314356
123207	C15orf40	15	83657715	83681050	75	21	740868	2.3198	0.010175	0.314356
10270	AKAP8	19	15464332	15490638	82	26	740868	2.319	0.010196	0.314472
57016	AKR1B10	7	134212344	134226166	76	17	740868	2.318	0.010225	0.314602
255374	MBLAC1	7	99724317	99726121	5	3	740868	2.3173	0.010245	0.314602
58515	SELENOK	3	53919226	53925989	25	7	740868	2.317	0.010252	0.314602
8742	TNFSF12	17	7452375	7461207	44	12	740868	2.3152	0.010301	0.315574
246778	IL27	16	28510683	28518155	17	4	740868	2.3139	0.010338	0.316176
3190	HNRNPK	9	86582998	86595692	37	12	740868	2.3105	0.010429	0.318425
3004	GZMM	19	544034	549920	52	14	740868	2.3093	0.010464	0.318777
5704	PSMC4	19	40476912	40487671	45	12	740868	2.3087	0.01048	0.318777
3140	MR1	1	181002561	181031074	132	32	740868	2.3082	0.010493	0.318777
54504	CPVL	7	29035247	29225213	939	92	740868	2.3058	0.01056	0.320279
222194	RSBN1L	7	77325743	77409120	303	25	740868	2.3048	0.01059	0.320547
5265	SERPINA1	14	94843084	94857029	85	26	740868	2.3043	0.010604	0.320547
80122	MAP3K19	2	135722076	135782301	197	28	740868	2.3023	0.01066	0.320628
9585	KIF20B	10	91461264	91534700	335	17	740868	2.3016	0.01068	0.320628
79053	ALG8	11	77811988	77850699	305	18	740868	2.3013	0.010689	0.320628
64065	PERP	6	138409642	138428660	116	27	740868	2.3012	0.01069	0.320628
65057	ACD	16	67691415	67694718	9	5	740868	2.3007	0.010705	0.320628
201181	ZNF385C	17	40177594	40205881	56	16	740868	2.3002	0.010719	0.320628
9179	AP4M1	7	99699130	99704803	20	8	740868	2.2989	0.010755	0.320628
4355	MPP2	17	41952727	41987079	148	21	740868	2.2988	0.010759	0.320628
10014	HDAC5	17	42154121	42201014	155	28	740868	2.2986	0.010765	0.320628
203062	TSNARE1	8	143293441	143484543	989	57	740868	2.2966	0.010821	0.32177
10785	WDR4	21	44263190	44299699	243	32	740868	2.2953	0.010858	0.322345
90362	FAM110B	8	58907068	59062277	587	48	740868	2.2922	0.010948	0.323165
54951	COMMD8	4	47452815	47465676	33	10	740868	2.292	0.010951	0.323165
4802	NFYC	1	41157242	41237275	266	25	740868	2.2919	0.010957	0.323165
2572	GAD2	10	26505236	26593491	393	27	740868	2.2912	0.010977	0.323165
141	ADPRH	3	119298280	119308792	42	20	740868	2.2908	0.010988	0.323165
10806	SDCCAG8	1	243419307	243663393	660	59	740868	2.2907	0.010992	0.323165
389676	LINC02906	8	94146324	94179079	115	27	740868	2.2893	0.011032	0.32365
10436	EMG1	12	7079944	7085165	13	6	740868	2.2889	0.011044	0.32365
51365	PLA1A	3	119316695	119348658	168	22	740868	2.2879	0.011071	0.32392
10642	IGF2BP1	17	47074774	47133507	149	31	740868	2.2871	0.011095	0.324102
55127	HEATR1	1	236712305	236767841	416	19	740868	2.2858	0.011133	0.324169
26135	SERBP1	1	67873493	67896123	46	20	740868	2.2854	0.011143	0.324169
5313	PKLR	1	155259084	155278531	46	11	740868	2.285	0.011157	0.324169
55014	STX17	9	102668915	102736818	190	28	740868	2.2841	0.011182	0.324169
123099	DEGS2	14	100612753	100626012	54	16	740868	2.2836	0.011198	0.324169
83538	ODAD4	17	40086888	40117669	63	13	740868	2.2834	0.011204	0.324169
57582	KCNT1	9	138594031	138684993	560	67	740868	2.2817	0.011254	0.3251
146212	KCTD19	16	67323338	67360664	85	25	740868	2.2811	0.011273	0.325133
3595	IL12RB2	1	67773047	67862583	324	28	740868	2.2779	0.011368	0.327355
10488	CREB3	9	35732317	35737005	17	9	740868	2.2763	0.011414	0.328162
57475	PLEKHH1	14	67999916	68056255	272	52	740868	2.2736	0.011494	0.328527
6323	SCN1A	2	166845670	167005642	770	44	740868	2.2729	0.011517	0.328527
6881	TAF10	11	6632048	6633475	5	3	740868	2.2725	0.011528	0.328527
100288332	NPIPA5	16	15457481	15475344	24	11	740868	2.2723	0.011535	0.328527
5880	RAC2	22	37621301	37640339	88	21	740868	2.2712	0.011569	0.328527
122748	OR11H6	14	20691869	20692861	11	3	740868	2.2701	0.011602	0.328527
11314	CD300A	17	72462509	72480937	98	21	740868	2.27	0.011605	0.328527
9277	WDR46	6	33246682	33257304	52	20	740868	2.2692	0.011627	0.328527
81566	CSRNP2	12	51454988	51477454	83	20	740868	2.2692	0.011628	0.328527
80742	PRR3	6	30524486	30532473	43	20	740868	2.2692	0.011629	0.328527
57657	HCN3	1	155247218	155259639	41	10	740868	2.2688	0.011642	0.328527
81579	PLA2G12A	4	110631145	110651242	61	16	740868	2.2687	0.011643	0.328527
53342	IL17D	13	21276222	21297239	66	13	740868	2.2676	0.011676	0.328949
28511	NKIRAS2	17	40169594	40177659	13	5	740868	2.266	0.011726	0.329198
487	ATP2A1	16	28889192	28915830	60	16	740868	2.2656	0.011737	0.329198
818	CAMK2G	10	75572259	75634349	142	26	740868	2.2656	0.011739	0.329198
23338	JADE2	5	133860003	133918918	223	47	740868	2.2611	0.011877	0.33059
9805	SCRN1	7	29959719	30029905	227	32	740868	2.2609	0.011882	0.33059
146227	BEAN1	16	66461200	66527432	238	53	740868	2.2602	0.011904	0.33059
53	ACP2	11	47260853	47270457	38	10	740868	2.2597	0.011919	0.33059
157807	CLVS1	8	62200514	62414204	744	82	740868	2.2597	0.01192	0.33059
23	ABCF1	6	30539170	30559309	87	22	740868	2.2584	0.011961	0.33059
8731	RNMT	18	13726659	13764555	140	25	740868	2.2583	0.011962	0.33059
8395	PIP5K1B	9	71320188	71624092	1296	62	740868	2.2582	0.011965	0.33059
53938	PPIL3	2	201735630	201754048	53	20	740868	2.2582	0.011968	0.33059
50487	PLA2G3	22	31530793	31536469	32	18	740868	2.2581	0.01197	0.33059
6948	TCN2	22	31003070	31023047	174	32	740868	2.2574	0.01199	0.330641
9526	MPDU1	17	7486965	7491530	11	6	740868	2.2562	0.012029	0.330853
84080	ENKD1	16	67696850	67700628	11	6	740868	2.256	0.012034	0.330853
696	BTN1A1	6	26500577	26510653	42	14	740868	2.2552	0.01206	0.331069
10628	TXNIP	1	145438438	145442635	4	1	740868	2.2538	0.012104	0.331777
55225	RAVER2	1	65210778	65298915	247	37	740868	2.252	0.012161	0.332606
2629	GBA1	1	155204239	155214653	27	8	740868	2.2512	0.012186	0.332606
345193	LRIT3	4	110769340	110793471	114	21	740868	2.2511	0.012189	0.332606
64641	EBF2	8	25699246	25902640	952	131	740868	2.2501	0.01222	0.332954
101927751	ALDH1A3-AS1	15	101457587	101459437	14	5	740868	2.2491	0.012253	0.333355
257068	PLCXD2	3	111393523	111565294	853	61	740868	2.2481	0.012284	0.3337
9919	SEC16A	9	139334548	139379297	195	36	740868	2.2473	0.012311	0.333936
26212	OR2B6	6	27925019	27925960	4	2	740868	2.2432	0.012443	0.336839
22974	TPX2	20	30326904	30389605	153	21	740868	2.2428	0.012455	0.336839
56256	SERTAD4	1	210406195	210420252	49	24	740868	2.2384	0.012597	0.34013
8976	WASL	7	123321981	123389125	231	31	740868	2.2379	0.012614	0.34013
5122	PCSK1	5	95726040	95768985	112	23	740868	2.2347	0.012718	0.342428
127534	GJB4	1	35225342	35229325	27	16	740868	2.2339	0.012746	0.342676
100526773	EPPIN-WFDC6	20	44164919	44176065	70	6	740868	2.2326	0.012788	0.343298
55681	SCYL2	12	100660918	100735502	228	36	740868	2.231	0.012842	0.343705
3603	IL16	15	81474941	81605104	563	49	740868	2.2309	0.012844	0.343705
8659	ALDH4A1	1	19197924	19229293	201	36	740868	2.2303	0.012865	0.343705
219417	OR8U1	11	56143100	56144029	10	4	740868	2.2291	0.012905	0.343705
345930	ECT2L	6	139117248	139225207	516	66	740868	2.2287	0.012918	0.343705
6947	TCN1	11	59620281	59634041	36	23	740868	2.2282	0.012934	0.343705
10786	SLC17A3	6	25845328	25874471	135	25	740868	2.2279	0.012944	0.343705
23276	KLHL18	3	47324116	47388306	97	28	740868	2.2276	0.012954	0.343705
55783	CMTR2	16	71315292	71323509	27	8	740868	2.226	0.013008	0.344636
26737	OR1L1	9	125423995	125424927	5	3	740868	2.2251	0.013039	0.344956
84206	MEX3B	15	82334119	82338484	6	4	740868	2.2244	0.013062	0.345064
5151	PDE8A	15	85523744	85682376	764	36	740868	2.2232	0.013102	0.345278
29970	SCHIP1	3	158991036	159615155	2289	139	740868	2.223	0.013108	0.345278
8013	NR4A3	9	102584137	102629173	78	26	740868	2.2222	0.013136	0.345517
161779	PGBD4	15	34394274	34396591	1	1	740868	2.2215	0.01316	0.345649
728392	LOC728392	17	5402747	5405042	15	7	740868	2.2195	0.013226	0.346541
5863	RGL2	6	33259431	33267386	20	7	740868	2.2193	0.013234	0.346541
120863	DEPDC4	12	100597447	100660857	227	41	740868	2.2188	0.013251	0.346541
23587	ELP5	17	7155372	7163259	19	6	740868	2.2164	0.013331	0.347844
8764	TNFRSF14	1	2487291	2495268	29	9	740868	2.2162	0.013339	0.347844
50862	RNF141	11	10533225	10562774	142	25	740868	2.2154	0.013366	0.348051
341392	ACSM4	12	7456928	7480969	74	22	740868	2.2147	0.01339	0.348178
3385	ICAM3	19	10444452	10450345	42	8	740868	2.2137	0.013424	0.348565
348980	HCN1	5	45255052	45696220	910	60	740868	2.2109	0.013522	0.35061
79802	HHIPL2	1	222695602	222721444	143	14	740868	2.2097	0.013562	0.351148
85366	MYLK2	20	30407115	30422500	60	12	740868	2.208	0.013623	0.351854
10941	UGT2A1	4	70454135	70518967	361	26	740868	2.2068	0.013666	0.351854
10210	TOPORS	9	32540542	32552626	33	15	740868	2.2056	0.013707	0.351854
79142	PHF23	17	7138347	7142825	6	3	740868	2.2052	0.013719	0.351854
1040	CDS1	4	85504057	85572493	162	29	740868	2.2051	0.013725	0.351854
10691	GMEB1	1	28995234	29042115	115	22	740868	2.2045	0.013745	0.351854
6677	SPAM1	7	123565286	123611464	168	35	740868	2.2041	0.01376	0.351854
8407	TAGLN2	1	159887897	159895332	22	9	740868	2.204	0.013762	0.351854
645843	TMEM14EP	3	152057487	152058779	3	1	740868	2.204	0.013763	0.351854
8662	EIF3B	7	2394474	2420380	115	19	740868	2.2032	0.01379	0.352051
26234	FBXL5	4	15606007	15661487	215	26	740868	2.2023	0.013822	0.352374
388759	LINC02897	1	247273462	247275719	17	5	740868	2.2009	0.013873	0.35306
55735	DNAJC11	1	6694228	6761966	223	36	740868	2.2	0.013903	0.35306
25875	LETMD1	12	51442082	51454207	40	8	740868	2.1999	0.013907	0.35306
140730	RIMS4	20	43380445	43438979	154	30	740868	2.1957	0.014055	0.355459
92521	SPECC1	17	19912649	20218072	1076	36	740868	2.1947	0.014091	0.355459
126669	SHE	1	154442118	154474786	61	15	740868	2.1944	0.014105	0.355459
55317	AP5S1	20	3801171	3805954	10	3	740868	2.1943	0.014105	0.355459
8637	EIF4EBP3	5	139927251	139929163	3	2	740868	2.1936	0.014132	0.355459
10868	USP20	9	132597696	132644121	422	19	740868	2.193	0.014153	0.355459
6632	SNRPD1	18	19192260	19210208	38	11	740868	2.1927	0.014166	0.355459
57119	EPPIN	20	44169265	44176516	56	4	740868	2.1927	0.014166	0.355459
9970	NR1I3	1	161199456	161208432	44	17	740868	2.1923	0.014177	0.355459
6631	SNRPC	6	34724871	34741634	94	17	740868	2.1916	0.014203	0.355621
92591	ASB16	17	42248074	42256650	28	8	740868	2.1907	0.014238	0.356009
123920	CMTM3	16	66637935	66647795	40	12	740868	2.1878	0.014341	0.35765
4857	NOVA1	14	26915089	27067239	529	33	740868	2.1873	0.014361	0.35765
4708	NDUFB2	7	140396481	140406446	26	7	740868	2.1871	0.014367	0.35765
101928868	LOC101928868	6	154831889	154843434	59	6	740868	2.1863	0.014395	0.35765
29801	ZDHHC8	22	20119364	20135530	63	14	740868	2.1858	0.014416	0.35765
85302	FBF1	17	73905925	73937119	120	34	740868	2.1851	0.014441	0.35765
27124	INPP5J	22	31518893	31530683	45	17	740868	2.1851	0.014441	0.35765
6929	TCF3	19	1609289	1652328	150	45	740868	2.1832	0.014509	0.358805
4076	CAPRIN1	11	34073230	34124157	178	11	740868	2.1828	0.014527	0.358805
58985	IL22RA1	1	24446261	24469783	99	26	740868	2.1821	0.01455	0.35887
55870	ASH1L	1	155305052	155532324	410	57	740868	2.1816	0.014569	0.35887
26090	ABHD12	20	25275379	25371618	386	27	740868	2.1805	0.014612	0.359443
84033	OBSCN	1	228395740	228566577	772	42	740868	2.1798	0.014635	0.359524
9404	LPXN	11	58294344	58345688	165	33	740868	2.1789	0.014668	0.359764
5696	PSMB8	6	32808494	32812712	28	8	740868	2.1785	0.014686	0.359764
23177	CEP68	2	65283495	65314142	137	28	740868	2.178	0.014704	0.359764
26259	FBXW8	12	117348756	117468953	460	32	740868	2.1772	0.014734	0.360015
29953	TRHDE	12	72666314	73059422	1266	66	740868	2.1755	0.014797	0.360423
55340	GIMAP5	7	150434436	150440737	35	8	740868	2.1753	0.014804	0.360423
55345	ZGRF1	4	113460489	113558151	311	34	740868	2.1751	0.01481	0.360423
58496	LY6G5B	6	31638728	31640227	11	6	740868	2.1737	0.014864	0.360765
389333	PROB1	5	138727635	138730885	6	3	740868	2.1736	0.014866	0.360765
219557	TEX47	7	88423420	88425031	9	4	740868	2.1731	0.014885	0.360765
3397	ID1	20	30193086	30194318	11	6	740868	2.1724	0.014913	0.360765
205	AK4	1	65613232	65697828	303	30	740868	2.1721	0.014923	0.360765
5208	PFKFB2	1	207207761	207254368	149	26	740868	2.1713	0.014954	0.361035
167359	NIM1K	5	43192170	43280952	366	67	740868	2.1695	0.015023	0.361618
5164	PDK2	17	48172101	48188733	67	17	740868	2.1689	0.015044	0.361618
10399	RACK1	5	180663928	180671209	37	7	740868	2.1684	0.015066	0.361618
84701	COX4I2	20	30225685	30232837	18	4	740868	2.168	0.015078	0.361618
2115	ETV1	7	13930854	14031050	566	79	740868	2.168	0.01508	0.361618
7629	ZNF76	6	35226691	35263762	164	31	740868	2.1673	0.015106	0.361618
343472	BARHL2	1	91177579	91182794	18	12	740868	2.167	0.015117	0.361618
284114	TMEM102	17	7338762	7340998	8	4	740868	2.1637	0.015244	0.363115
6195	RPS6KA1	1	26856249	26901520	143	26	740868	2.1634	0.015254	0.363115
390212	GPR152	11	67218772	67220200	9	2	740868	2.1629	0.015275	0.363115
5683	PSMA2	7	42956460	42971805	41	7	740868	2.1624	0.015294	0.363115
11030	RBPMS	8	30242017	30429778	542	46	740868	2.1617	0.01532	0.363115
171586	ABHD3	18	19230858	19284766	127	22	740868	2.1613	0.015336	0.363115
23019	CNOT1	16	58553850	58663790	455	30	740868	2.1611	0.015344	0.363115
5570	PKIB	6	122793062	123047518	875	60	740868	2.1608	0.015355	0.363115
9927	MFN2	1	12040238	12073572	119	16	740868	2.1605	0.015369	0.363115
647024	C6orf132	6	42068857	42110715	204	43	740868	2.159	0.015424	0.363115
389207	GRXCR1	4	42895283	43032675	636	59	740868	2.1582	0.015456	0.363115
10487	CAP1	1	40505912	40538321	148	15	740868	2.1574	0.015486	0.363115
10599	SLCO1B1	12	21284128	21392730	566	34	740868	2.1574	0.015487	0.363115
4150	MAZ	16	29817417	29822504	7	5	740868	2.1574	0.015489	0.363115
221937	FOXK1	7	4721930	4811074	393	83	740868	2.1573	0.01549	0.363115
23432	GPR161	1	168048780	168106905	171	28	740868	2.1565	0.015521	0.363115
83463	MXD3	5	176732501	176741096	25	10	740868	2.1553	0.015567	0.363115
114799	ESCO1	18	19109242	19180697	124	24	740868	2.1552	0.015573	0.363115
27122	DKK3	11	11984543	12031373	266	75	740868	2.1551	0.015577	0.363115
10067	SCAMP3	1	155225770	155232176	17	6	740868	2.1551	0.015578	0.363115
4140	MARK3	14	103851701	103970168	425	25	740868	2.1542	0.015613	0.363466
70	ACTC1	15	35080297	35087927	28	15	740868	2.1529	0.015665	0.363656
3904	LAIR2	19	55014013	55021900	54	15	740868	2.1527	0.015671	0.363656
6799	SULT1A2	16	28603264	28611058	43	10	740868	2.1525	0.015681	0.363656
2956	MSH6	2	48010221	48034092	121	27	740868	2.1515	0.015717	0.363896
50619	DEF6	6	35265595	35289548	99	23	740868	2.1512	0.015732	0.363896
57706	DENND1A	9	126141933	126692423	2049	87	740868	2.1493	0.015805	0.363896
84466	MEGF10	5	126565206	126796914	1096	44	740868	2.149	0.015817	0.363896
253143	PRR14L	22	32077333	32146120	241	39	740868	2.1489	0.015822	0.363896
2932	GSK3B	3	119540800	119813264	793	48	740868	2.1485	0.015836	0.363896
84669	USP32	17	58254551	58469586	350	29	740868	2.1477	0.015867	0.363896
125228	FAM210A	18	13663346	13726591	284	29	740868	2.1476	0.015875	0.363896
3107	HLA-C	6	31236526	31239913	91	16	740868	2.1472	0.01589	0.363896
5153	PDE1B	12	54943177	54973023	120	39	740868	2.1472	0.015891	0.363896
10712	ENTREP3	1	155216996	155225274	29	5	740868	2.1456	0.015951	0.364812
100533177	KRTAP29-1	17	39458078	39459103	6	2	740868	2.1436	0.016034	0.36618
1500	CTNND1	11	57520756	57586652	162	37	740868	2.1431	0.016051	0.36618
10677	AVIL	12	58190415	58210193	61	21	740868	2.1416	0.016113	0.367135
26534	OR10G2	14	22102066	22102998	5	2	740868	2.1399	0.016181	0.367594
1603	DAD1	14	23033807	23058143	187	16	740868	2.1393	0.016207	0.367594
392843	IQCA1L	7	150887960	150892611	22	9	740868	2.1392	0.01621	0.367594
3933	LCN1	9	138413284	138418386	38	14	740868	2.139	0.016216	0.367594
9353	SLIT2	4	20254566	20622184	1470	160	740868	2.1386	0.016234	0.367594
285282	RABL3	3	120405528	120461384	169	35	740868	2.137	0.016301	0.368653
318	NUDT2	9	34329504	34343711	42	11	740868	2.1363	0.016328	0.368806
8622	PDE8B	5	76476082	76724081	963	78	740868	2.1345	0.0164	0.369758
90226	UCN2	3	48599151	48601201	8	5	740868	2.134	0.016423	0.369758
375	ARF1	1	228270361	228286913	47	17	740868	2.1338	0.016431	0.369758
4763	NF1	17	29421945	29704695	609	24	740868	2.1329	0.016464	0.370044
79874	RABEP2	16	28915742	28937339	41	13	740868	2.1323	0.016489	0.370098
100652758	LOC100652758	5	151149354	151151069	8	3	740868	2.1319	0.016507	0.370098
10144	FAM13A	4	89647105	90032549	1538	61	740868	2.131	0.016546	0.370517
53616	ADAM22	7	87563566	87832204	771	46	740868	2.1285	0.016649	0.372366
11073	TOPBP1	3	133319449	133380762	228	31	740868	2.1266	0.016727	0.373652
219870	OR10G9	11	123893720	123894655	18	8	740868	2.1254	0.016776	0.374008
57495	NWD2	4	37246690	37451087	963	93	740868	2.1252	0.016784	0.374008
5909	RAP1GAP	1	21922708	21996010	349	57	740868	2.1245	0.016815	0.374242
168455	CCDC71L	7	106297211	106301634	15	7	740868	2.1231	0.016871	0.374992
112869	SGF29	16	28565249	28603111	128	20	740868	2.1222	0.016912	0.374992
389124	IQCF5	3	51907737	51909600	3	1	740868	2.1221	0.016915	0.374992
10465	PPIH	1	43123706	43142429	42	12	740868	2.1217	0.016931	0.374992
100507341	SMIM18	8	30496117	30503473	22	9	740868	2.1211	0.016956	0.37509
2961	GTF2E2	8	30436031	30515738	244	36	740868	2.1201	0.017	0.375145
10459	MAD2L2	1	11734537	11751678	76	17	740868	2.1198	0.017013	0.375145
9049	AIP	11	67250505	67258579	29	6	740868	2.1194	0.01703	0.375145
153241	CEP120	5	122680579	122759286	313	18	740868	2.1186	0.017062	0.375145
138241	C9orf85	9	74526190	74588373	157	24	740868	2.1186	0.017063	0.375145
49860	CRNN	1	152381719	152386750	17	6	740868	2.1181	0.017082	0.375145
5585	PKN1	19	14544166	14582679	154	41	740868	2.1163	0.017158	0.375562
9855	FARP2	2	242295664	242434256	668	53	740868	2.1157	0.017185	0.375562
6283	S100A12	1	153346184	153348075	2	1	740868	2.1155	0.017196	0.375562
1346	COX7A1	19	36641824	36643771	5	3	740868	2.1153	0.017202	0.375562
255189	PLA2G4F	15	42433332	42448839	86	25	740868	2.1153	0.017204	0.375562
440836	CIMAP1B	22	50968836	50971008	6	2	740868	2.1144	0.017242	0.375942
288	ANK3	10	61786056	62493284	3272	125	740868	2.1137	0.017268	0.375988
51104	ABHD17B	9	74477368	74526148	126	14	740868	2.113	0.017299	0.375988
6865	TACR2	10	71163958	71176674	84	11	740868	2.1129	0.017306	0.375988
81890	QTRT1	19	10812112	10824043	41	13	740868	2.1118	0.017352	0.376538
1780	DYNC1I1	7	95401818	95739634	1357	122	740868	2.1112	0.017376	0.376611
202052	DNAJC18	5	138745892	138780171	50	9	740868	2.1091	0.01747	0.378199
373863	DND1	5	140050381	140053171	7	5	740868	2.1081	0.01751	0.378615
390155	OR5T1	11	56043115	56044095	2	1	740868	2.1052	0.017636	0.380504
1267	CNP	17	40118737	40129754	18	6	740868	2.105	0.017646	0.380504
220081	ERICH6B	13	46115432	46189874	302	37	740868	2.1047	0.01766	0.380504
10734	STAG3	7	99775186	99812010	118	17	740868	2.1031	0.01773	0.381262
3035	HARS1	5	140053490	140071681	66	16	740868	2.1029	0.017737	0.381262
23632	CA14	1	150229554	150237478	7	4	740868	2.1024	0.017758	0.381264
128989	TANGO2	22	20004554	20053449	231	42	740868	2.1006	0.017838	0.38204
84068	SLC10A7	4	147175137	147443123	876	52	740868	2.0998	0.017874	0.38204
122525	C14orf28	14	45366433	45376460	29	7	740868	2.0998	0.017875	0.38204
90326	THAP3	1	6684925	6695646	48	13	740868	2.0997	0.017878	0.38204
113115	MTFR2	6	136552168	136571449	40	19	740868	2.0991	0.017904	0.382148
50964	SOST	17	41831099	41836156	9	6	740868	2.098	0.017954	0.382767
28988	DBNL	7	44084239	44101315	79	14	740868	2.097	0.017995	0.383193
9388	LIPG	18	47087069	47119278	129	36	740868	2.096	0.018043	0.383766
2665	GDI2	10	5807186	5855512	225	45	740868	2.0942	0.018121	0.384976
347240	KIF24	9	34252378	34329198	252	28	740868	2.0932	0.018165	0.385045
7266	DNAJC7	17	40128439	40169715	72	17	740868	2.0929	0.018177	0.385045
25833	POU2F3	11	120107349	120190653	347	52	740868	2.0925	0.018197	0.385045
85409	NKD2	5	1008941	1038927	156	31	740868	2.0918	0.018228	0.385045
4600	MX2	21	42733918	42780870	228	60	740868	2.0917	0.018235	0.385045
84306	PDCD2L	19	34895300	34917073	69	16	740868	2.0913	0.018251	0.385045
8888	MCM3AP	21	47655047	47706211	224	36	740868	2.0876	0.018418	0.388119
8351	H3C4	6	26196982	26199521	17	6	740868	2.0866	0.01846	0.388555
26279	PLA2G2D	1	20439143	20446059	29	13	740868	2.0858	0.018499	0.388927
100507055	LRCOL1	12	133179672	133187229	49	10	740868	2.0812	0.018709	0.391113
63928	CHP2	16	23765948	23770272	8	5	740868	2.0812	0.01871	0.391113
56172	ANKH	5	14704909	14871887	596	63	740868	2.081	0.018718	0.391113
8314	BAP1	3	52435020	52444121	20	9	740868	2.0804	0.018746	0.391113
4635	MYL4	17	45266728	45301045	117	33	740868	2.0803	0.018751	0.391113
84547	PGBD1	6	28249314	28270326	103	28	740868	2.08	0.018763	0.391113
644672	CLDN25	11	113650518	113651207	1	1	740868	2.0798	0.01877	0.391113
4869	NPM1	5	170814652	170837888	79	10	740868	2.0793	0.018796	0.391113
157	GRK3	22	25960861	26125259	536	29	740868	2.0793	0.018797	0.391113
4335	MNT	17	2287354	2304258	66	15	740868	2.0785	0.018831	0.391113
7919	DDX39B	6	31497996	31510252	100	27	740868	2.0783	0.018839	0.391113
222663	SCUBE3	6	35181824	35220856	124	34	740868	2.0772	0.018891	0.391126
143162	FRMPD2	10	49364602	49482941	387	47	740868	2.077	0.018899	0.391126
56475	RPRM	2	154333852	154335322	4	2	740868	2.0769	0.018904	0.391126
9592	IER2	19	13261282	13265722	13	7	740868	2.0762	0.018938	0.391385
5506	PPP1R3A	7	113516882	113559082	87	28	740868	2.075	0.018995	0.392119
64799	IQCH	15	67547138	67794142	624	41	740868	2.074	0.019039	0.392489
84314	TMEM107	17	8076296	8079723	30	17	740868	2.0737	0.019056	0.392489
7494	XBP1	22	29190548	29196560	12	6	740868	2.073	0.019085	0.392643
5965	RECQL	12	21621844	21654603	161	32	740868	2.0715	0.019157	0.393389
7227	TRPS1	8	116420724	116713299	767	45	740868	2.0712	0.019172	0.393389
574537	UGT2A2	4	70454135	70505360	289	21	740868	2.0709	0.019186	0.393389
79792	GSDMD	8	144635383	144645232	47	14	740868	2.0701	0.019221	0.393663
1674	DES	2	220283099	220291461	29	10	740868	2.0694	0.019256	0.393938
54853	WDR55	5	140044384	140051930	28	11	740868	2.0639	0.019514	0.398406
11051	NUDT21	16	56463048	56485261	57	19	740868	2.063	0.019558	0.398406
65987	KCTD14	11	77726761	77757237	203	27	740868	2.062	0.019606	0.398406
643905	PRR21	2	240981230	240982399	4	2	740868	2.0619	0.01961	0.398406
89890	KBTBD6	13	41701709	41706936	8	5	740868	2.0618	0.019614	0.398406
4025	LPO	17	56315787	56345879	77	22	740868	2.0614	0.019631	0.398406
55108	BSDC1	1	32830704	32860062	54	27	740868	2.0612	0.019643	0.398406
126668	TDRD10	1	154474695	154520624	201	17	740868	2.0606	0.019673	0.398406
283461	C12orf40	12	40019972	40115716	339	27	740868	2.0605	0.019674	0.398406
7059	THBS3	1	155165379	155177772	27	11	740868	2.0601	0.019693	0.398406
51441	YTHDF2	1	29063133	29096287	93	21	740868	2.057	0.019843	0.400673
1942	EFNA1	1	155100349	155107386	20	10	740868	2.0569	0.019849	0.400673
8326	FZD9	7	72848109	72850450	4	2	740868	2.0556	0.019909	0.401398
10102	TSFM	12	58176528	58196639	54	12	740868	2.0552	0.019931	0.401398
285605	DTWD2	5	118172569	118324240	588	62	740868	2.0546	0.01996	0.401398
7275	TUB	11	8040742	8127654	413	83	740868	2.0543	0.019973	0.401398
4731	NDUFV3	21	44313378	44329773	97	20	740868	2.0522	0.020073	0.402963
64147	KIF9	3	47269516	47324337	129	32	740868	2.0518	0.020096	0.402981
3112	HLA-DOB	6	32780540	32784825	43	12	740868	2.0507	0.02015	0.403414
23114	NFASC	1	204797782	204991950	972	89	740868	2.05	0.020184	0.403414
1842	ECM2	9	95255829	95298374	126	21	740868	2.05	0.020184	0.403414
23518	R3HDM1	2	136289036	136482839	362	29	740868	2.0492	0.020219	0.403466
55226	NAT10	11	34127111	34172581	146	16	740868	2.0488	0.020243	0.403466
417	ART1	11	3663487	3685844	163	28	740868	2.0486	0.020253	0.403466
7138	TNNT1	19	55644161	55660752	57	19	740868	2.0476	0.020297	0.403714
4931	NVL	1	224415036	224517891	357	48	740868	2.0471	0.020326	0.403714
2582	GALE	1	24122089	24127294	4	2	740868	2.0467	0.020346	0.403714
29118	DDX25	11	125774261	125793005	85	20	740868	2.0465	0.020354	0.403714
57223	PPP4R3B	2	55774428	55844860	310	32	740868	2.0455	0.020401	0.404206
56311	ANKRD7	7	117864493	117882785	72	13	740868	2.0446	0.020445	0.404425
839	CASP6	4	110609785	110629814	77	19	740868	2.0442	0.020469	0.404425
1984	EIF5A	17	7210318	7215782	19	8	740868	2.0433	0.020512	0.404425
64761	PARP12	7	139723544	139764086	187	32	740868	2.0432	0.020517	0.404425
64786	TBC1D15	12	72233487	72320629	335	27	740868	2.0431	0.020523	0.404425
8100	IFT88	13	21140585	21265576	462	35	740868	2.0426	0.020546	0.404441
26073	POLDIP2	17	26673659	26684603	21	12	740868	2.042	0.020577	0.404614
6694	SPP2	2	234959346	234985776	156	22	740868	2.0395	0.0207	0.406459
831	CAST	5	95997741	96110387	431	53	740868	2.0387	0.020742	0.406459
9057	SLC7A6	16	68298419	68335726	116	30	740868	2.0385	0.020752	0.406459
54979	PLAAT2	11	63320242	63330855	25	14	740868	2.0383	0.02076	0.406459
492311	IGIP	5	139505521	139508391	4	2	740868	2.0374	0.020806	0.406922
2686	GGT7	20	33432523	33460661	80	18	740868	2.0364	0.020856	0.407463
2981	GUCA2B	1	42619092	42621495	10	5	740868	2.0352	0.020917	0.408082
22978	NT5C2	10	104847774	104953063	351	29	740868	2.0341	0.020968	0.408082
5536	PPP5C	19	46850251	46896238	165	30	740868	2.0337	0.020989	0.408082
9380	GRHPR	9	37422693	37436990	35	12	740868	2.0336	0.020994	0.408082
158055	C9orf163	9	139377947	139380519	6	4	740868	2.0335	0.021002	0.408082
26291	FGF21	19	49258816	49261587	12	6	740868	2.0331	0.021022	0.408082
9625	AATK	17	79084285	79139877	342	57	740868	2.0311	0.021121	0.409287
5708	PSMD2	3	184016886	184026842	27	13	740868	2.031	0.021129	0.409287
4302	MLLT6	17	36861873	36886056	12	4	740868	2.0293	0.021214	0.409484
4854	NOTCH3	19	15270444	15311792	187	21	740868	2.0292	0.021221	0.409484
362	AQP5	12	50355279	50359465	11	8	740868	2.0291	0.021226	0.409484
80864	EGFL8	6	32132382	32136062	19	9	740868	2.029	0.021229	0.409484
10160	FARP1	13	98794893	99102023	1568	178	740868	2.0284	0.021258	0.40961
11112	HIBADH	7	27565059	27702620	643	32	740868	2.0268	0.021343	0.410745
53917	RAB24	5	176728199	176730744	6	3	740868	2.0264	0.021362	0.410745
3796	KIF2A	5	61601989	61683011	285	28	740868	2.0255	0.021407	0.411177
5775	PTPN4	2	120517207	120742496	577	33	740868	2.0241	0.021478	0.411408
5916	RARG	12	53604350	53626040	58	18	740868	2.0234	0.021515	0.411408
26133	TRPC4AP	20	33590207	33680618	354	23	740868	2.0231	0.021532	0.411408
23037	PDZD2	5	31639345	32111038	2530	281	740868	2.0227	0.021552	0.411408
4706	NDUFAB1	16	23592335	23607639	68	14	740868	2.0222	0.021576	0.411408
220388	CCDC89	11	85394893	85397320	6	3	740868	2.0218	0.0216	0.411408
80194	TMEM134	11	67231819	67236748	13	5	740868	2.0213	0.021624	0.411408
54751	FBLIM1	1	16083107	16113089	129	26	740868	2.0209	0.021647	0.411408
26468	LHX6	9	124964856	124991166	67	25	740868	2.0208	0.021649	0.411408
65979	PHACTR4	1	28696093	28826881	511	18	740868	2.0206	0.021662	0.411408
160298	C11orf42	11	6226798	6232365	15	9	740868	2.0197	0.021706	0.411408
2301	FOXE3	1	47881744	47883724	7	5	740868	2.0195	0.021716	0.411408
58530	LY6G6D	6	31683048	31685698	13	5	740868	2.0193	0.02173	0.411408
92483	LDHAL6B	15	59499015	59500787	16	4	740868	2.0192	0.021735	0.411408
83931	STK40	1	36805225	36851525	105	23	740868	2.0177	0.021809	0.41238
55585	UBE2Q1	1	154521051	154531138	22	7	740868	2.017	0.021849	0.412708
64983	MRPL32	7	42971804	42977456	29	5	740868	2.0147	0.021968	0.414527
11344	TWF2	3	52262626	52273183	45	15	740868	2.0129	0.022061	0.415317
57644	MYH7B	20	33543704	33590240	172	26	740868	2.0127	0.022072	0.415317
84875	PARP10	8	145051320	145060635	24	6	740868	2.0124	0.022089	0.415317
29035	HAPSTR1	16	9185537	9213555	105	22	740868	2.0122	0.022101	0.415317
284485	RIIAD1	1	151694013	151702082	28	11	740868	2.0117	0.022125	0.415339
54332	GDAP1	8	75262618	75279345	85	15	740868	2.0099	0.022221	0.416111
79324	OR51G1	11	4944604	4945569	10	4	740868	2.0077	0.022337	0.416111
5868	RAB5A	3	19988572	20026667	184	29	740868	2.0076	0.022344	0.416111
6449	SGTA	19	2754711	2783363	124	18	740868	2.0066	0.022396	0.416111
4547	MTTP	4	100485240	100545154	300	27	740868	2.0062	0.022419	0.416111
10120	ACTR1B	2	98272402	98280561	27	11	740868	2.0061	0.022422	0.416111
25895	EEF1AKMT3	12	58166383	58176324	33	9	740868	2.0061	0.022425	0.416111
3938	LCT	2	136545415	136594750	153	19	740868	2.0054	0.022462	0.416111
5834	PYGB	20	25228706	25278648	323	27	740868	2.0048	0.022493	0.416111
149076	ZNF362	1	33721908	33766321	113	23	740868	2.0045	0.022506	0.416111
4820	NKTR	3	42642147	42690233	170	24	740868	2.0044	0.022512	0.416111
80222	TARS2	1	150459840	150480085	87	15	740868	2.0044	0.022513	0.416111
57010	CABP4	11	67219886	67229245	39	10	740868	2.0044	0.022514	0.416111
4775	NFATC3	16	68118654	68263162	403	28	740868	2.0043	0.022518	0.416111
27089	UQCRQ	5	132202319	132204536	12	6	740868	2.0041	0.022528	0.416111
1453	CSNK1D	17	80197523	80231594	77	22	740868	2.0036	0.022556	0.416111
25921	ZDHHC5	11	57435223	57468659	96	27	740868	2.0035	0.022564	0.416111
201475	RAB12	18	8609443	8639380	110	14	740868	2.0032	0.022577	0.416111
163732	CITED4	1	41326728	41328018	12	4	740868	2.0026	0.02261	0.416298
9099	USP2	11	119225925	119252436	83	23	740868	2.0006	0.022718	0.417678
3048	HBG2	11	5274421	5276011	13	4	740868	2.0003	0.022734	0.417678
5187	PER1	17	8043788	8059723	49	18	740868	1.9988	0.022813	0.417678
80324	PUS1	12	132413745	132428406	58	15	740868	1.9986	0.022825	0.417678
83640	RAMAC	15	83654955	83659809	9	5	740868	1.9981	0.022852	0.417678
10063	COX17	3	119388372	119396243	44	10	740868	1.9977	0.022877	0.417678
390157	OR8K1	11	56113515	56114474	6	3	740868	1.9977	0.022877	0.417678
94160	ABCC12	16	48116884	48180681	91	39	740868	1.9974	0.022892	0.417678
399687	MYO18A	17	27400528	27507432	362	40	740868	1.9972	0.022904	0.417678
9369	NRXN3	14	78636716	80334633	6915	332	740868	1.9969	0.022918	0.417678
57038	RARS2	6	88223656	88299735	365	26	740868	1.9966	0.022937	0.417678
1861	TOR1A	9	132575221	132586441	43	13	740868	1.9957	0.022983	0.418098
84316	NAA38	17	7760003	7788608	93	23	740868	1.9951	0.023016	0.418264
339665	SLC35E4	22	31031793	31043862	67	17	740868	1.9947	0.023038	0.418264
6817	SULT1A1	16	28616908	28634907	83	9	740868	1.9937	0.023091	0.418809
147968	CAPN12	19	39220832	39235114	73	13	740868	1.9924	0.023165	0.41919
100287482	SMKR1	7	129142320	129152773	46	18	740868	1.9922	0.023174	0.41919
112744	IL17F	6	52101484	52109298	32	12	740868	1.9921	0.023181	0.41919
80099	PKD1L1-AS1	7	47834889	47859445	118	24	740868	1.9907	0.023256	0.420129
2342	FNTB	14	65453507	65529370	329	40	740868	1.9899	0.0233	0.420507
346157	ZNF391	6	27356524	27371683	104	8	740868	1.9887	0.023367	0.421285
2674	GFRA1	10	117816436	118033126	885	92	740868	1.9875	0.023431	0.421285
54920	DUS2	16	68056847	68113226	133	26	740868	1.9874	0.023439	0.421285
85025	TMEM60	7	77423045	77427747	17	9	740868	1.9873	0.023445	0.421285
27090	ST6GALNAC4	9	130670165	130679326	30	14	740868	1.9866	0.023486	0.421285
25802	LMOD1	1	201865584	201915716	204	44	740868	1.9864	0.023496	0.421285
29072	SETD2	3	47057898	47205467	337	34	740868	1.9859	0.023522	0.421285
55175	KLHL11	17	40009799	40021629	47	10	740868	1.9858	0.023528	0.421285
3568	IL5RA	3	3108008	3152058	240	79	740868	1.9846	0.023597	0.421543
23074	BLTP3B	12	100422233	100536642	460	42	740868	1.9843	0.023611	0.421543
196472	GARIN6	12	100041528	100043892	11	5	740868	1.9838	0.023637	0.421543
7978	MTERF1	7	91502021	91510016	27	10	740868	1.9837	0.023642	0.421543
115939	TSR3	16	1399241	1401873	10	6	740868	1.9835	0.023658	0.421543
4222	MEOX1	17	41717757	41739262	90	19	740868	1.9829	0.023687	0.421647
2110	ETFDH	4	159593277	159629842	70	36	740868	1.9807	0.023814	0.423494
282974	STK32C	10	133996038	134145377	926	98	740868	1.9798	0.023863	0.423557
140733	MACROD2	20	13976146	16033842	9002	412	740868	1.9798	0.023864	0.423557
222698	NKAPL	6	28227075	28228736	10	6	740868	1.979	0.023907	0.423907
378925	RNF148	7	122341720	122343021	4	2	740868	1.9784	0.023942	0.424115
25799	ZNF324	19	58978412	58984945	14	8	740868	1.9774	0.023999	0.424515
55540	IL17RB	3	53880577	53899827	90	22	740868	1.9767	0.024037	0.424515
10133	OPTN	10	13141425	13180291	150	31	740868	1.9765	0.02405	0.424515
55786	ZNF415	19	53611132	53636173	155	29	740868	1.976	0.024079	0.424515
8831	SYNGAP1	6	33387847	33421466	98	34	740868	1.9759	0.024081	0.424515
27430	MAT2B	5	162930070	162946359	49	12	740868	1.9751	0.024127	0.4248
64170	CARD9	9	139258408	139268133	42	15	740868	1.9741	0.024186	0.4248
11320	MGAT4A	2	99235569	99347589	388	45	740868	1.9739	0.024197	0.4248
4356	MPP3	17	41878167	41910547	100	19	740868	1.9739	0.024199	0.4248
23203	PMPCA	9	139305110	139318213	52	11	740868	1.9733	0.024231	0.4248
9837	GINS1	20	25388323	25429191	183	25	740868	1.9732	0.024237	0.4248
101929469	TEX52	12	2957293	2965317	18	5	740868	1.9722	0.024294	0.425308
389118	CDHR4	3	49828165	49837254	27	13	740868	1.9718	0.024313	0.425308
100507679	MUC22	6	30973729	31003179	511	40	740868	1.9709	0.024366	0.425308
284827	KRTAP13-4	21	31802594	31803076	3	2	740868	1.9707	0.024381	0.425308
89872	AQP10	1	154293592	154297801	18	7	740868	1.9704	0.024398	0.425308
246329	STAC3	12	57637241	57644971	19	9	740868	1.9702	0.024406	0.425308
54587	MXRA8	1	1288071	1297183	39	10	740868	1.9697	0.024438	0.425459
1843	DUSP1	5	172195093	172198203	8	2	740868	1.9691	0.02447	0.42561
347734	SLC35B2	6	44221838	44225283	12	7	740868	1.9677	0.02455	0.426594
6525	SMTN	22	31477282	31500610	88	20	740868	1.9668	0.024605	0.426771
11118	BTN3A2	6	26365387	26378548	123	14	740868	1.9667	0.024607	0.426771
9513	FXR2	17	7494548	7518215	62	20	740868	1.9643	0.024747	0.428531
56987	BBX	3	107241783	107530176	905	73	740868	1.9642	0.024756	0.428531
3009	H1-5	6	27834570	27835359	8	4	740868	1.9638	0.024779	0.428531
11056	DDX52	17	35972363	36003493	31	4	740868	1.9607	0.024958	0.430951
375449	MAST4	5	65892176	66465426	2385	142	740868	1.9604	0.024975	0.430951
5873	RAB27A	15	55495164	55582034	415	47	740868	1.9601	0.024991	0.430951
843	CASP10	2	202047621	202094129	113	21	740868	1.9595	0.025028	0.430951
388939	PCARE	2	29284556	29297127	89	17	740868	1.9582	0.025106	0.430951
374355	CCDC172	10	118083940	118139541	205	31	740868	1.9577	0.025131	0.430951
2358	FPR2	19	52264453	52273779	55	11	740868	1.9577	0.025131	0.430951
64328	XPO4	13	21351468	21476913	478	40	740868	1.9573	0.025154	0.430951
9332	CD163	12	7623412	7656414	103	29	740868	1.9573	0.025155	0.430951
51061	TXNDC11	16	11772939	11836707	248	33	740868	1.9569	0.025177	0.430951
5520	PPP2R2A	8	26149007	26230196	291	48	740868	1.9569	0.025179	0.430951
10842	PPP1R17	7	31726631	31748069	85	21	740868	1.9545	0.025323	0.432284
283710	LINC03034	15	31514970	31523050	47	11	740868	1.9545	0.025323	0.432284
23595	ORC3	6	88299785	88377172	305	30	740868	1.9544	0.025328	0.432284
7855	FZD5	2	208627310	208634143	20	12	740868	1.9534	0.025389	0.432337
10665	TSBP1	6	32260475	32339705	940	32	740868	1.9531	0.025402	0.432337
3775	KCNK1	1	233749750	233808258	299	57	740868	1.9528	0.025424	0.432337
84617	TUBB6	18	12308218	12326568	79	9	740868	1.9527	0.025426	0.432337
84138	SLC7A6OS	16	68318043	68344868	86	27	740868	1.9517	0.025487	0.43297
23218	NBEAL2	3	47021173	47051194	72	17	740868	1.9491	0.02564	0.434861
29107	NXT1	20	23331373	23335408	24	11	740868	1.949	0.025646	0.434861
344167	FOXI3	2	88747726	88752053	7	3	740868	1.9484	0.025681	0.434969
8325	FZD8	10	35927177	35930362	7	4	740868	1.9478	0.02572	0.434969
119392	SFR1	10	105880059	105886143	24	6	740868	1.9477	0.025724	0.434969
64284	RAB17	2	238482965	238499769	126	16	740868	1.9469	0.025772	0.435173
5538	PPT1	1	40538382	40563142	116	16	740868	1.9458	0.025838	0.435173
996	CDC27	17	45195310	45266665	216	38	740868	1.9457	0.025843	0.435173
3890	KRT84	12	52771596	52779417	76	8	740868	1.9453	0.025869	0.435173
84870	RSPO3	6	127439844	127520626	213	26	740868	1.9453	0.025872	0.435173
6389	SDHA	5	218338	256815	363	8	740868	1.9444	0.025923	0.435173
6854	SYN2	3	12182150	12233532	181	35	740868	1.9444	0.025924	0.435173
23184	MESD	15	81239667	81282235	149	16	740868	1.9443	0.025927	0.435173
1019	CDK4	12	58141510	58146304	19	11	740868	1.9431	0.026005	0.43608
51440	HPCAL4	1	40144320	40157382	93	19	740868	1.9419	0.026075	0.436852
89884	LHX4	1	180199433	180244188	267	53	740868	1.9413	0.026109	0.436922
57469	PNMA8B	19	46994448	46999169	17	9	740868	1.9404	0.026166	0.436922
23355	VPS8	3	184529925	184770402	660	44	740868	1.9403	0.026171	0.436922
768239	PSAPL1	4	7432021	7436700	45	11	740868	1.94	0.026191	0.436922
140803	TRPM6	9	77337411	77503010	543	69	740868	1.9398	0.026199	0.436922
3745	KCNB1	20	47988505	48099181	532	60	740868	1.9383	0.026296	0.437754
56920	SEMA3G	3	52467268	52479112	36	15	740868	1.9375	0.026341	0.437754
7064	THOP1	19	2785464	2813599	97	16	740868	1.9372	0.026362	0.437754
11237	RNF24	20	3912068	3996216	319	30	740868	1.9372	0.026363	0.437754
309	ANXA6	5	150480267	150537443	302	58	740868	1.9371	0.026369	0.437754
51704	GPRC5B	16	19870293	19897049	98	20	740868	1.9347	0.026513	0.439744
10955	SERINC3	20	43124864	43150726	66	18	740868	1.9336	0.026583	0.440102
57545	CC2D2A	4	15471489	15603594	451	55	740868	1.933	0.026619	0.440102
5644	PRSS1	7	142457319	142460927	8	5	740868	1.933	0.026619	0.440102
10573	MRPL28	16	417384	420584	30	11	740868	1.9322	0.026669	0.440102
27166	PRELID1	5	176730763	176733960	12	6	740868	1.9315	0.02671	0.440102
4904	YBX1	1	43148060	43168024	55	22	740868	1.9313	0.026723	0.440102
22981	NINL	20	25433333	25566167	500	36	740868	1.9311	0.026734	0.440102
219875	OR4D5	11	123810324	123811280	3	2	740868	1.9308	0.026754	0.440102
2668	GDNF	5	37812779	37839782	109	27	740868	1.93	0.026806	0.440102
11249	NXPH2	2	139426727	139537811	475	69	740868	1.9298	0.026817	0.440102
619208	FAM229B	6	112408674	112423993	71	8	740868	1.9294	0.026838	0.440102
84265	POLR3GL	1	145456236	145476081	4	2	740868	1.9288	0.02688	0.440102
151649	PP2D1	3	20021453	20053765	156	25	740868	1.9287	0.026881	0.440102
386653	IL31	12	122656577	122658746	8	3	740868	1.9283	0.026909	0.440102
100113407	TMEM170B	6	11538460	11583757	178	24	740868	1.9275	0.02696	0.440102
56134	PCDHAC2	5	140345747	140391929	122	39	740868	1.9274	0.026962	0.440102
8348	H2BC17	6	27861203	27926100	295	44	740868	1.9273	0.026973	0.440102
5306	PITPNA	17	1421283	1466110	198	26	740868	1.9268	0.027005	0.440102
124923	RSKR	17	26934799	26941377	9	6	740868	1.9266	0.027012	0.440102
400954	EML6	2	54952149	55199157	1446	100	740868	1.9261	0.027044	0.440102
6123	RPL3L	16	1994580	2004679	60	29	740868	1.9258	0.027067	0.440102
55573	CDV3	3	133292434	133309118	61	15	740868	1.9255	0.027084	0.440102
1859	DYRK1A	21	38739859	38887679	563	37	740868	1.9253	0.027093	0.440102
11162	NUDT6	4	123813799	123844159	195	32	740868	1.925	0.027114	0.440102
221079	ARL5B	10	18948264	18970568	100	25	740868	1.9245	0.027144	0.440196
55239	OGFOD1	16	56485424	56511407	83	17	740868	1.9234	0.027216	0.440972
145389	SLC38A6	14	61447832	61550451	276	35	740868	1.9216	0.027328	0.441082
78995	HROB	17	42219274	42239844	57	15	740868	1.9216	0.027328	0.441082
79908	BTNL8	5	180326077	180377906	192	15	740868	1.9216	0.027331	0.441082
55816	DOK5	20	53092266	53267710	798	49	740868	1.9215	0.027335	0.441082
55561	CDC42BPG	11	64591661	64612041	67	16	740868	1.921	0.027364	0.441082
6424	SFRP4	7	37945534	37956525	67	11	740868	1.921	0.027368	0.441082
23039	XPO7	8	21777180	21864096	262	25	740868	1.9204	0.027401	0.441224
64925	CCDC71	3	49199968	49203785	7	3	740868	1.9192	0.027478	0.441957
5138	PDE2A	11	72287184	72385497	383	48	740868	1.919	0.027495	0.441957
79066	METTL16	17	2319343	2415200	338	53	740868	1.9159	0.027691	0.444715
5522	PPP2R2C	4	6322305	6565327	1397	146	740868	1.9151	0.027743	0.445158
374768	SPEM1	17	7323652	7324956	6	3	740868	1.9139	0.027817	0.44549
2960	GTF2E1	3	120461558	120502216	129	31	740868	1.9137	0.027829	0.44549
2913	GRM3	7	86273230	86494193	714	73	740868	1.9136	0.027837	0.44549
81611	ANP32E	1	150190717	150208504	30	7	740868	1.9122	0.027924	0.44649
64129	TINAGL1	1	32042086	32053290	21	14	740868	1.9113	0.027983	0.44665
6549	SLC9A2	2	103236166	103327809	339	51	740868	1.9111	0.027996	0.44665
63899	NSUN3	3	93781855	93845630	155	50	740868	1.9105	0.028032	0.44665
9770	RASSF2	20	4760669	4804291	313	45	740868	1.9105	0.028032	0.44665
391195	OR2T33	1	248436154	248437116	3	2	740868	1.91	0.028064	0.446769
79632	FAM184A	6	119280992	119470552	855	67	740868	1.9096	0.028095	0.446872
57536	KIAA1328	18	34409069	34812095	1215	42	740868	1.9076	0.028221	0.447815
196403	DTX3	12	57998110	58003585	16	9	740868	1.9075	0.028226	0.447815
201516	ZSCAN4	19	58180303	58190520	44	10	740868	1.9075	0.028228	0.447815
400831	C20orf202	20	1184098	1188918	17	7	740868	1.9043	0.028438	0.450145
10016	PDCD6	5	271736	315089	244	23	740868	1.9036	0.028478	0.450145
3300	DNAJB2	2	220144040	220151622	28	9	740868	1.9034	0.028492	0.450145
4188	MDFI	6	41606194	41621984	97	22	740868	1.9034	0.028492	0.450145
51057	WDPCP	2	63348518	63815867	1579	52	740868	1.9033	0.028501	0.450145
59082	CARD18	11	105008448	105010461	7	5	740868	1.903	0.028523	0.450145
157506	RDH10	8	74206837	74237520	119	25	740868	1.9023	0.028569	0.450481
6830	SUPT6H	17	26989221	27029255	79	29	740868	1.901	0.028652	0.451009
56245	C21orf62	21	34162984	34186053	89	11	740868	1.901	0.028652	0.451009
889	KRIT1	7	91828283	91875414	97	29	740868	1.9006	0.02868	0.451037
2059	EPS8	12	15773075	15942510	417	61	740868	1.9001	0.028713	0.451037
4891	SLC11A2	12	51373566	51422118	153	19	740868	1.8998	0.028728	0.451037
6860	SYT4	18	40847857	40857615	15	6	740868	1.899	0.028784	0.451527
81488	POLR2M	15	57998901	58009753	41	16	740868	1.8981	0.028841	0.451599
10130	PDIA6	2	10908889	10978103	537	25	740868	1.8969	0.028922	0.451599
9698	PUM1	1	31404353	31538838	449	39	740868	1.8967	0.028933	0.451599
3957	LGALS2	22	37966253	37976024	77	14	740868	1.8964	0.028956	0.451599
583	BBS2	16	56504301	56554008	143	25	740868	1.8961	0.028974	0.451599
121273	C12orf54	12	48876283	48890297	79	14	740868	1.8957	0.028998	0.451599
339862	BALR6	3	18004064	18310414	988	66	740868	1.8954	0.029019	0.451599
6891	TAP2	6	32789610	32806547	224	34	740868	1.8953	0.029024	0.451599
401720	FIGNL2	12	52211676	52242364	129	44	740868	1.8951	0.02904	0.451599
118738	ZNF488	10	48355029	48373866	37	12	740868	1.895	0.029048	0.451599
64771	ILRUN	6	34555065	34664625	439	35	740868	1.8945	0.029076	0.451599
55691	FRMD4A	10	13685706	14372866	4167	286	740868	1.8937	0.029131	0.451599
83543	AIF1L	9	133971863	133998539	110	29	740868	1.8934	0.029153	0.451599
10807	ENTR1	9	139296374	139305054	74	15	740868	1.8931	0.02917	0.451599
23420	NOMO1	16	14927643	14990014	38	18	740868	1.8929	0.029183	0.451599
6713	SQLE	8	126010720	126034525	121	17	740868	1.8929	0.029185	0.451599
57121	LPAR5	12	6728001	6745297	44	20	740868	1.8907	0.029329	0.453228
126567	C2CD4C	19	405443	409170	30	14	740868	1.8906	0.02934	0.453228
57478	USP31	16	23072727	23160591	352	27	740868	1.8893	0.029425	0.454157
55295	KLHL26	19	18747835	18781308	142	30	740868	1.888	0.02951	0.455037
55151	TMEM38B	9	108456806	108538892	398	21	740868	1.8877	0.029532	0.455037
3909	LAMA3	18	21269562	21535030	743	41	740868	1.8873	0.029558	0.455053
113655	MFSD3	8	145733161	145736596	10	6	740868	1.8864	0.029624	0.455532
5620	PRM2	16	11369493	11370337	6	4	740868	1.8861	0.02964	0.455532
2737	GLI3	7	42000547	42277469	1286	129	740868	1.8857	0.029668	0.455532
3978	LIG1	19	48618702	48673852	298	20	740868	1.8851	0.029711	0.455532
5698	PSMB9	6	32821927	32827628	38	10	740868	1.8844	0.029754	0.455532
100132247	NPIPB5	16	22489791	22547856	1	1	740868	1.8843	0.02976	0.455532
5269	SERPINB6	6	2948393	2972399	114	20	740868	1.8843	0.029764	0.455532
80235	PIGZ	3	196673214	196695742	122	34	740868	1.8839	0.029793	0.455547
126272	EID2B	19	40021630	40023494	8	5	740868	1.8833	0.029832	0.455547
2907	GRINA	8	145064226	145067596	6	2	740868	1.8831	0.02984	0.455547
54433	GAR1	4	110736666	110745893	38	12	740868	1.8821	0.02991	0.45599
5329	PLAUR	19	44150247	44174498	129	28	740868	1.882	0.029919	0.45599
54460	MRPS21	1	150266262	150281414	58	8	740868	1.8807	0.030003	0.456888
161247	FITM1	14	24600675	24602058	5	3	740868	1.8803	0.030031	0.456932
708	C1QBP	17	5336099	5342471	31	9	740868	1.8794	0.030095	0.457269
25885	POLR1A	2	86253451	86333278	362	38	740868	1.8789	0.03013	0.457269
286097	MICU3	8	16884747	16980148	434	52	740868	1.8785	0.03016	0.457269
2559	GABRA6	5	161112658	161129598	66	16	740868	1.8781	0.030181	0.457269
728489	DNLZ	9	139256352	139268111	55	18	740868	1.8778	0.030207	0.457269
7586	ZKSCAN1	7	99613204	99642803	80	23	740868	1.8777	0.030214	0.457269
40	ASIC2	17	31340105	32483825	5548	382	740868	1.8772	0.030247	0.457269
10473	HMGN4	6	26538572	26547165	26	7	740868	1.877	0.030262	0.457269
388135	INSYN1	15	74027772	74045495	67	23	740868	1.8766	0.030287	0.457269
57562	CEP126	11	101785746	101871793	305	30	740868	1.8763	0.030304	0.457269
23481	PES1	22	30972612	31003000	169	39	740868	1.8758	0.030339	0.457419
84247	RTL6	22	44888450	44894005	31	4	740868	1.8749	0.030403	0.457941
2911	GRM1	6	146286032	146758782	1583	78	740868	1.8745	0.03043	0.457941
1237	CCR8	3	39371197	39375171	11	7	740868	1.8742	0.030449	0.457941
643866	CBLN3	14	24895738	24898731	19	8	740868	1.8731	0.030527	0.458448
138429	PIP5KL1	9	130683808	130693076	28	9	740868	1.873	0.030533	0.458448
4914	NTRK1	1	156785542	156851642	237	54	740868	1.872	0.030606	0.459166
7324	UBE2E1	3	23847384	23933131	312	37	740868	1.8712	0.03066	0.459597
1850	DUSP8	11	1575281	1593150	88	15	740868	1.87	0.03074	0.460418
79152	FA2H	16	74746853	74808729	310	52	740868	1.8693	0.030794	0.460592
285600	KIAA0825	5	93486556	93954309	1115	134	740868	1.8691	0.030807	0.460592
3655	ITGA6	2	173291954	173371181	440	45	740868	1.8687	0.030836	0.460592
9712	USP6NL	10	11502509	11653679	526	40	740868	1.8684	0.030854	0.460592
27285	TEKT2	1	36549676	36553877	9	4	740868	1.8672	0.030937	0.460592
3426	CFI	4	110661848	110723381	298	26	740868	1.8669	0.030958	0.460592
646670	NA	15	72921107	72932539	15	8	740868	1.8667	0.03097	0.460592
79809	TTC21B	2	166729872	166810348	299	33	740868	1.8666	0.030979	0.460592
55909	BIN3	8	22477931	22526661	202	35	740868	1.8666	0.030979	0.460592
55604	CARMIL1	6	25279656	25620758	2188	123	740868	1.8645	0.031128	0.460904
7067	THRA	17	38218446	38250120	78	24	740868	1.8642	0.031149	0.460904
150737	IFT70B	2	178414880	178417524	8	4	740868	1.8639	0.031169	0.460904
285148	IAH1	2	9614670	9628604	72	15	740868	1.8635	0.031196	0.460904
89882	TPD52L3	9	6328349	6331900	19	10	740868	1.8631	0.031223	0.460904
163688	CALML6	1	1846266	1848733	13	4	740868	1.8628	0.031242	0.460904
1270	CNTF	11	58390146	58393206	11	6	740868	1.8627	0.031251	0.460904
23348	DOCK9	13	99445741	99738660	1278	47	740868	1.8626	0.031262	0.460904
8363	H4C11	6	27791903	27792258	5	2	740868	1.8623	0.031282	0.460904
143888	POGLUT3	11	108342832	108369169	73	19	740868	1.8616	0.031328	0.460904
163131	ZNF780B	19	40534167	40562125	119	17	740868	1.8609	0.031379	0.460904
10501	SEMA6B	19	4542600	4559771	73	23	740868	1.8607	0.031392	0.460904
5283	PIGH	14	68048225	68067017	92	22	740868	1.8607	0.031394	0.460904
374407	DNAJB13	11	73661364	73681713	104	22	740868	1.8606	0.031399	0.460904
84687	PPP1R9B	17	48211101	48227877	35	16	740868	1.8603	0.03142	0.460904
388753	COA6	1	234508932	234519795	53	7	740868	1.8601	0.031436	0.460904
7551	ZNF3	7	99661470	99680171	48	17	740868	1.8595	0.031476	0.460904
773	CACNA1A	19	13317256	13617274	1346	155	740868	1.8591	0.031505	0.460904
9378	NRXN1	2	50145643	51259674	5359	204	740868	1.8591	0.031506	0.460904
8874	ARHGEF7	13	111767624	111958081	823	72	740868	1.859	0.031516	0.460904
1956	EGFR	7	55086678	55279262	863	119	740868	1.8588	0.031531	0.460904
55871	ZNG1A	9	121038	179077	96	11	740868	1.8584	0.031557	0.460914
5592	PRKG1	10	52750911	54058110	6389	313	740868	1.8579	0.031592	0.461052
930	CD19	16	28943082	28950668	14	8	740868	1.8575	0.031617	0.461052
136371	ASB10	7	150872785	150884919	52	13	740868	1.857	0.031652	0.461193
6547	SLC8A3	14	70510934	70655787	775	58	740868	1.8558	0.031738	0.462077
7036	TFR2	7	100218039	100240332	58	17	740868	1.8551	0.031791	0.462479
283807	FBXL22	15	63889327	63894627	20	11	740868	1.8547	0.031817	0.462488
26168	SENP3	17	7465309	7475287	31	12	740868	1.8534	0.031916	0.463119
23446	SLC44A1	9	108006906	108200785	630	45	740868	1.853	0.031938	0.463119
3769	KCNJ13	2	233630512	233641275	39	11	740868	1.853	0.031944	0.463119
50700	RDH8	19	10123925	10132954	59	12	740868	1.8527	0.031962	0.463119
9909	DENND4B	1	153901977	153919162	28	7	740868	1.852	0.032015	0.463518
112495	GTF3C6	6	111279763	111289091	72	6	740868	1.8498	0.03217	0.465096
100505385	IQCJ-SCHIP1	3	158787041	159615155	3005	148	740868	1.8497	0.032175	0.465096
22899	ARHGEF15	17	8213556	8225834	60	19	740868	1.8485	0.032264	0.466013
10247	RIDA	8	99114567	99129418	74	19	740868	1.847	0.032373	0.466222
577	ADGRB3	6	69345210	70099403	3248	129	740868	1.8469	0.032381	0.466222
1643	DDB2	11	47236493	47260769	80	16	740868	1.8465	0.032412	0.466222
7069	THRSP	11	77774907	77779403	33	6	740868	1.8463	0.032422	0.466222
3312	HSPA8	11	122928200	122933074	38	15	740868	1.8463	0.032426	0.466222
7111	TMOD1	9	100263462	100367177	396	66	740868	1.8458	0.032462	0.466222
5351	PLOD1	1	11994724	12035599	184	27	740868	1.8457	0.032471	0.466222
160140	C11orf65	11	108179012	108338258	529	26	740868	1.8448	0.032535	0.466222
84221	SPATC1L	21	47581062	47605167	192	19	740868	1.8446	0.032551	0.466222
51008	ASCC1	10	73855790	73976892	418	33	740868	1.8445	0.032554	0.466222
224	ALDH3A2	17	19552064	19580908	106	22	740868	1.8439	0.032595	0.466222
400950	LINC02898	2	42162508	42180943	76	25	740868	1.8438	0.032609	0.466222
57528	KCTD16	5	143550437	143858097	910	49	740868	1.8437	0.032611	0.466222
11142	PKIG	20	43160422	43247678	235	38	740868	1.8419	0.032747	0.467415
4745	NELL1	11	20691117	21597232	4682	329	740868	1.8418	0.032751	0.467415
643246	MAP1LC3B2	12	116997186	117014425	83	24	740868	1.8412	0.032792	0.467415
8522	GAS7	17	9813926	10101868	1570	201	740868	1.8412	0.032797	0.467415
25941	TPGS2	18	34359513	34409179	150	18	740868	1.8407	0.032831	0.467534
80004	ESRP2	16	68262450	68270136	10	6	740868	1.839	0.032955	0.468625
1636	ACE	17	61554422	61575741	74	12	740868	1.8386	0.032986	0.468625
90780	PYGO2	1	154929502	154934258	5	3	740868	1.8384	0.033005	0.468625
9230	RAB11B	19	8455205	8469318	74	17	740868	1.838	0.033028	0.468625
9046	DOK2	8	21766384	21771290	13	6	740868	1.8377	0.033056	0.468625
2224	FDPS	1	155278539	155290457	25	8	740868	1.8374	0.033074	0.468625
91754	NEK9	14	75548818	75593778	105	13	740868	1.837	0.033101	0.468625
57418	WDR18	19	984328	994569	85	11	740868	1.8368	0.033123	0.468625
482	ATP1B2	17	7554254	7561089	17	7	740868	1.8365	0.033139	0.468625
9121	SLC16A5	17	73083822	73102257	108	19	740868	1.8345	0.033289	0.470381
3065	HDAC1	1	32757708	32799227	56	37	740868	1.8334	0.033372	0.470798
1770	DNAH9	17	11501748	11873065	1377	118	740868	1.8332	0.033385	0.470798
11278	KLF12	13	74260149	74708400	1916	182	740868	1.8331	0.033396	0.470798
11247	NXPH4	12	57610578	57620232	45	16	740868	1.8327	0.033424	0.470829
10142	AKAP9	7	91570181	91739987	503	19	740868	1.8307	0.033571	0.47224
23189	KANK1	9	470294	746106	2143	73	740868	1.8307	0.033576	0.47224
401665	OR51T1	11	4903049	4904113	3	2	740868	1.8293	0.033679	0.473324
57124	CD248	11	66081958	66084515	10	6	740868	1.8276	0.033808	0.474699
25981	DNAH1	3	52350335	52434513	265	28	740868	1.8271	0.033843	0.474699
54069	MIS18A	21	33640530	33651376	30	14	740868	1.8269	0.033855	0.474699
646892	SH2D7	15	78384927	78396393	44	16	740868	1.8241	0.034066	0.477291
58499	ZNF462	9	109622469	109775525	434	77	740868	1.8234	0.034123	0.477722
338761	C1QL4	12	49726200	49730971	25	11	740868	1.823	0.034155	0.477803
85453	TSPYL5	8	98285714	98290192	21	10	740868	1.8217	0.034248	0.478737
3400	ID4	6	19837579	19842431	28	14	740868	1.8208	0.034322	0.479032
26063	DECR2	16	451858	462487	49	13	740868	1.8207	0.034325	0.479032
399968	PATE4	11	125703211	125709967	47	13	740868	1.8204	0.034348	0.479032
5691	PSMB3	17	36908978	36920484	16	5	740868	1.8194	0.034424	0.4791
7137	TNNI3	19	55663135	55669100	23	8	740868	1.8193	0.034432	0.4791
9936	CD302	2	160625139	160655115	140	27	740868	1.8192	0.034443	0.4791
389257	LRRC14B	5	191626	195468	13	4	740868	1.819	0.034458	0.4791
646457	C19orf67	19	14192444	14196607	13	7	740868	1.8181	0.034526	0.479213
375748	ERCC6L2	9	98637900	98731122	355	34	740868	1.818	0.03453	0.479213
79020	C7orf25	7	42948223	42951689	15	5	740868	1.8178	0.034545	0.479213
6446	SGK1	6	134490384	134639196	547	77	740868	1.8162	0.034667	0.480082
55809	TRERF1	6	42192669	42419943	769	74	740868	1.816	0.034683	0.480082
3567	IL5	5	131877136	131892555	30	10	740868	1.8157	0.034708	0.480082
50854	SNHG32	6	31802693	31807541	28	15	740868	1.8156	0.034713	0.480082
93973	ACTR8	3	53898959	53916229	80	19	740868	1.8147	0.034789	0.48044
354	KLK3	19	51358171	51364020	52	14	740868	1.8145	0.034797	0.48044
51477	ISYNA1	19	18545198	18549111	15	5	740868	1.814	0.034838	0.48044
5162	PDHB	3	58413357	58419579	30	8	740868	1.8135	0.034877	0.48044
146712	B3GNTL1	17	80900009	81009686	708	59	740868	1.8134	0.034882	0.48044
27436	EML4	2	42396490	42559688	730	38	740868	1.8133	0.034897	0.48044
346389	MACC1	7	20174278	20257013	424	37	740868	1.8126	0.034944	0.480724
60	ACTB	7	5566779	5570232	17	7	740868	1.8117	0.035014	0.481324
5702	PSMC3	11	47440320	47448024	30	10	740868	1.8102	0.03513	0.482355
558	AXL	19	41725104	41767672	152	31	740868	1.8091	0.035219	0.482355
6048	RNF5	6	32146162	32148570	13	5	740868	1.8089	0.035236	0.482355
23265	EXOC7	17	74077086	74099868	82	9	740868	1.8081	0.035292	0.482355
27094	KCNMB3	3	178957537	178984838	170	27	740868	1.808	0.035301	0.482355
8892	EIF2B2	14	75469612	75476294	18	7	740868	1.8075	0.035339	0.482355
6051	RNPEP	1	201951766	201975275	152	23	740868	1.8073	0.035356	0.482355
285588	EFCAB9	5	171621176	171630458	48	14	740868	1.8071	0.035371	0.482355
7054	TH	11	2185159	2193107	29	10	740868	1.8071	0.035377	0.482355
219479	OR8U3	11	56184734	56185708	10	4	740868	1.8068	0.035395	0.482355
5413	SEPTIN5	22	19701987	19710845	8	4	740868	1.8065	0.035418	0.482355
55776	SAYSD1	6	39071840	39082865	41	17	740868	1.8064	0.035424	0.482355
3675	ITGA3	17	48133340	48167849	109	20	740868	1.8063	0.035433	0.482355
3831	KLC1	14	104095525	104167888	269	31	740868	1.806	0.035461	0.482375
140870	WFDC6	20	44162836	44168134	19	7	740868	1.8055	0.035499	0.482532
6259	RYK	3	133875978	133969586	286	30	740868	1.8046	0.035566	0.482859
11214	AKAP13	15	85923818	86292589	1821	63	740868	1.8045	0.035576	0.482859
55365	TMEM176A	7	150497854	150502208	37	8	740868	1.8038	0.035635	0.4833
727800	RNF208	9	140114699	140115775	3	2	740868	1.8024	0.035744	0.483419
5352	PLOD2	3	145787225	145879282	364	22	740868	1.8023	0.035751	0.483419
84062	DTNBP1	6	15523032	15663289	509	43	740868	1.8021	0.035763	0.483419
5524	PTPA	9	131873183	131911225	215	25	740868	1.8018	0.035789	0.483419
91156	IGFN1	1	201159952	201198080	201	43	740868	1.8017	0.0358	0.483419
131408	FAM131A	3	184053717	184064063	35	17	740868	1.8011	0.035845	0.483419
6364	CCL20	2	228678558	228682280	6	4	740868	1.801	0.035855	0.483419
56300	IL36G	2	113735596	113743249	18	9	740868	1.8006	0.035883	0.483419
11276	SYNRG	17	35874900	35969544	88	10	740868	1.8004	0.035896	0.483419
7083	TK1	17	76170160	76183285	78	21	740868	1.8003	0.035909	0.483419
6457	SH3GL3	15	84116091	84287495	631	90	740868	1.7981	0.036077	0.485322
64098	PARVG	22	44566271	44604349	212	39	740868	1.797	0.036167	0.486174
90102	PHLDB2	3	111451327	111695364	1256	74	740868	1.7961	0.036242	0.486823
51667	NUB1	7	151038785	151075547	180	35	740868	1.7952	0.036313	0.487418
2847	MCHR1	22	41075182	41078818	14	7	740868	1.7939	0.036412	0.488093
126917	IFFO2	1	19230774	19282826	271	47	740868	1.7937	0.036429	0.488093
729092	AGAP5	10	75434033	75464357	28	10	740868	1.7933	0.036465	0.488093
346	APOC4	19	45445495	45448753	14	7	740868	1.793	0.036486	0.488093
79047	KCTD15	19	34287751	34306666	61	24	740868	1.7926	0.03652	0.488093
28989	NTMT1	9	132371036	132397879	143	26	740868	1.7925	0.036524	0.488093
317719	KLHL10	17	39992572	40004599	49	7	740868	1.7917	0.036594	0.488671
79567	RIPOR1	16	67562717	67580691	41	16	740868	1.7911	0.036638	0.488889
1600	DAB1	1	57460453	58716211	5621	304	740868	1.7908	0.036664	0.488889
7535	ZAP70	2	98330031	98356990	104	25	740868	1.7901	0.036723	0.489318
127254	ERICH3	1	75033795	75139422	274	35	740868	1.7891	0.036801	0.489999
3984	LIMK1	7	73498107	73536855	116	28	740868	1.7882	0.036869	0.490546
4842	NOS1	12	117645921	117799607	616	58	740868	1.7877	0.036909	0.490548
285668	C5orf64	5	60933636	61002362	283	37	740868	1.7876	0.036923	0.490548
53904	MYO3A	10	26223002	26501465	1649	36	740868	1.7858	0.037062	0.492037
29928	TIMM22	17	900357	905407	20	9	740868	1.785	0.037134	0.49213
1912	PHC2	1	33789224	33841194	207	33	740868	1.7849	0.037137	0.49213
55052	MRPL20	1	1337276	1342693	20	8	740868	1.7848	0.03715	0.49213
1676	DFFA	1	10520588	10532613	48	18	740868	1.7837	0.037235	0.492566
5861	RAB1A	2	65313988	65357435	182	27	740868	1.7837	0.037237	0.492566
6256	RXRA	9	137218316	137332431	587	54	740868	1.783	0.037289	0.49267
27230	SERP1	3	150259780	150264428	15	7	740868	1.7828	0.037306	0.49267
10616	RBCK1	20	388696	411610	134	28	740868	1.7821	0.037366	0.49267
10978	CLP1	11	57425216	57429337	9	6	740868	1.7821	0.037367	0.49267
353133	LCE1C	1	152777311	152779107	17	5	740868	1.7818	0.037389	0.49267
101927562	NA	11	1575746	1577687	12	4	740868	1.7816	0.037407	0.49267
390667	PTX4	16	1535940	1538468	28	8	740868	1.7792	0.037604	0.494508
4586	MUC5AC	11	1142474	1162465	74	21	740868	1.779	0.037618	0.494508
5024	P2RX3	11	57105841	57137549	114	19	740868	1.7789	0.037628	0.494508
390168	OR5M1	11	56380031	56380978	3	2	740868	1.7785	0.037659	0.494559
57132	CHMP1B	18	11851389	11854448	6	4	740868	1.778	0.037705	0.494807
220107	DLEU7	13	51286759	51417885	576	52	740868	1.7766	0.037814	0.495422
1509	CTSD	11	1773982	1785222	52	13	740868	1.7758	0.037881	0.495422
5709	PSMD3	17	38137021	38154213	86	13	740868	1.7758	0.037884	0.495422
4035	LRP1	12	57522282	57607142	221	53	740868	1.7748	0.037969	0.495422
26005	C2CD3	11	73723759	73882064	650	42	740868	1.7748	0.03797	0.495422
116985	ARAP1	11	72396114	72463465	285	33	740868	1.7747	0.037976	0.495422
79734	KCTD17	22	37447779	37459430	26	12	740868	1.7745	0.037989	0.495422
11240	PADI2	1	17393256	17445948	325	25	740868	1.774	0.038031	0.495422
84124	ZNF394	7	99084142	99097925	29	12	740868	1.774	0.038033	0.495422
5771	PTPN2	18	12785477	12884337	345	37	740868	1.7737	0.038054	0.495422
79738	BBS10	12	76738266	76742222	9	5	740868	1.7737	0.03806	0.495422
9255	AIMP1	4	107236767	107270382	97	17	740868	1.7734	0.038078	0.495422
3488	IGFBP5	2	217536828	217560272	83	16	740868	1.7731	0.038109	0.495471
128372	OR6N1	1	158735534	158736472	9	3	740868	1.7727	0.03814	0.495521
9409	PEX16	11	45931220	45939674	31	10	740868	1.7718	0.038217	0.495608
3889	KRT83	12	52708085	52715182	60	7	740868	1.771	0.038279	0.495608
273	AMPH	7	38423297	38671167	1451	91	740868	1.771	0.038283	0.495608
2314	FLII	17	18148129	18162230	41	16	740868	1.7707	0.038304	0.495608
10849	POLR1G	19	45909467	45914024	29	10	740868	1.7705	0.038326	0.495608
8065	CUL5	11	107879408	107978495	302	32	740868	1.7704	0.038328	0.495608
1272	CNTN1	12	41086244	41466214	1767	78	740868	1.7703	0.038337	0.495608
65243	ZFP69B	1	40915774	40929390	73	28	740868	1.7689	0.038451	0.49639
80227	PAAF1	11	73587744	73638781	233	33	740868	1.7689	0.038452	0.49639
1431	CS	12	56665483	56694175	62	12	740868	1.7685	0.038493	0.496568
64789	EXO5	1	40974391	40982228	41	12	740868	1.7664	0.038665	0.496919
10322	SMYD5	2	73441366	73454355	42	16	740868	1.7664	0.038665	0.496919
100131897	INSYN2B	5	169290719	169407744	515	80	740868	1.7658	0.038716	0.496919
1775	DNASE1L2	16	2286253	2288712	8	5	740868	1.7649	0.038789	0.496919
9217	VAPB	20	56964175	57026157	244	34	740868	1.7648	0.038798	0.496919
3284	HSD3B2	1	119957554	119965662	38	9	740868	1.7645	0.038825	0.496919
140628	GATA5	20	61038553	61051026	58	16	740868	1.7641	0.03886	0.496919
54899	PXK	3	58318617	58411815	464	28	740868	1.7637	0.038895	0.496919
339327	ZNF546	19	40502943	40523514	74	12	740868	1.7632	0.03893	0.496919
534	ATP6V1G2	6	31512228	31514625	14	9	740868	1.763	0.038951	0.496919
10972	TMED10	14	75598171	75643349	116	15	740868	1.7629	0.038955	0.496919
8459	TPST2	22	26921714	26986089	378	47	740868	1.7629	0.038955	0.496919
55122	AKIRIN2	6	88384578	88411985	128	24	740868	1.7628	0.038965	0.496919
112939	NACC1	19	13228813	13251961	57	19	740868	1.7627	0.038974	0.496919
9135	RABEP1	17	5185558	5289132	474	44	740868	1.7624	0.038999	0.496919
6665	SOX15	17	7491496	7494037	6	3	740868	1.7622	0.039019	0.496919
8837	CFLAR	2	201980877	202037411	175	26	740868	1.7618	0.039052	0.496919
160065	PATE1	11	125616180	125619743	28	9	740868	1.7616	0.039068	0.496919
79042	TSEN34	19	54694112	54698394	18	7	740868	1.7615	0.039079	0.496919
79144	PPDPF	20	62151426	62153524	12	6	740868	1.7614	0.039081	0.496919
4695	NDUFA2	5	140024948	140027370	13	5	740868	1.7611	0.039112	0.496919
844	CASQ1	1	160160285	160171676	39	15	740868	1.761	0.03912	0.496919
3419	IDH3A	15	78441698	78462884	73	18	740868	1.7594	0.039255	0.497945
259197	NCR3	6	31556660	31560762	29	14	740868	1.7591	0.039283	0.497945
4507	MTAP	9	21802635	21941040	644	53	740868	1.759	0.039291	0.497945
79183	TTPAL	20	43104526	43123244	49	14	740868	1.7588	0.03931	0.497945
84236	RHBDD1	2	227700652	227863926	426	27	740868	1.7583	0.039347	0.498067
8115	TCL1A	14	96176304	96180533	17	6	740868	1.7577	0.039396	0.498342
347741	OTOP3	17	72931897	72946087	64	19	740868	1.7573	0.039437	0.498514
256356	GK5	3	141876369	141944449	231	47	740868	1.7565	0.039499	0.498952
440026	TMEM41B	11	9302201	9336315	152	25	740868	1.756	0.039548	0.49898
2321	FLT1	13	28874483	29069265	656	69	740868	1.7559	0.039556	0.49898
9925	ZBTB5	9	37438099	37465407	70	26	740868	1.7549	0.039639	0.499067
6868	ADAM17	2	9629392	9695917	206	25	740868	1.7547	0.039656	0.499067
7525	YES1	18	721592	812327	338	32	740868	1.754	0.039711	0.499067
7570	ZNF22	10	45496273	45500777	20	8	740868	1.7536	0.039749	0.499067
100131107	LOC100131107	1	152052033	152053058	1	1	740868	1.7535	0.03976	0.499067
126308	MOB3A	19	2071031	2096501	96	30	740868	1.7534	0.039767	0.499067
2672	GFI1	1	92940318	92952433	49	18	740868	1.753	0.039805	0.499067
79727	LIN28A	1	26737269	26756219	55	20	740868	1.7529	0.039809	0.499067
3364	HUS1	7	48002885	48019222	72	13	740868	1.7527	0.039827	0.499067
54329	GPR85	7	112720468	112727833	25	11	740868	1.7524	0.03985	0.499067
375686	SPATC1	8	145086582	145102015	28	11	740868	1.7523	0.039864	0.499067
25913	POT1	7	124462440	124570037	455	22	740868	1.7494	0.040112	0.501015
3837	KPNB1	17	45726861	45762037	71	19	740868	1.7494	0.040112	0.501015
54749	EPDR1	7	37960163	37991543	186	42	740868	1.7491	0.040135	0.501015
140459	ASB6	9	132396883	132404496	29	10	740868	1.7491	0.040139	0.501015
8824	CES2	16	66968347	66978999	24	11	740868	1.7484	0.0402	0.501015
57805	CCAR2	8	22462145	22477984	72	11	740868	1.7484	0.040201	0.501015
4702	NDUFA8	9	124894745	124922098	131	20	740868	1.7482	0.040212	0.501015
4286	MITF	3	69788586	70017488	902	41	740868	1.7464	0.040367	0.502602
1848	DUSP6	12	89741837	89746296	23	6	740868	1.7453	0.040462	0.503098
6095	RORA	15	60780483	61521502	3094	316	740868	1.7454	0.040462	0.503098
374955	SPATA21	1	16722101	16763919	158	33	740868	1.7444	0.040542	0.503268
8416	ANXA9	1	150954499	150968114	47	15	740868	1.7442	0.040559	0.503268
79345	OR51B2	11	5344528	5345582	11	2	740868	1.7442	0.040562	0.503268
84067	FHIP1B	11	6232564	6255941	80	19	740868	1.743	0.040671	0.503268
25855	BRMS1	11	66104804	66112596	20	7	740868	1.7426	0.040702	0.503268
26873	OPLAH	8	145106167	145115584	31	10	740868	1.7425	0.040714	0.503268
11196	SEC23IP	10	121652085	121704170	226	22	740868	1.7424	0.040718	0.503268
8431	NR0B2	1	27237975	27240567	9	5	740868	1.7421	0.040742	0.503268
653	BMP5	6	55618451	55740388	390	68	740868	1.7419	0.040766	0.503268
57546	PDP2	16	66914360	66925004	29	10	740868	1.7419	0.040767	0.503268
115572	TENT5B	1	27331511	27339333	16	7	740868	1.7416	0.040788	0.503268
3182	HNRNPAB	5	177631508	177638184	29	15	740868	1.7414	0.040807	0.503268
9200	HACD1	10	17631031	17659383	132	25	740868	1.7407	0.040872	0.503272
115294	PCMTD1	8	52730140	52811735	369	19	740868	1.7402	0.040911	0.503272
84166	NLRC5	16	57023469	57117438	515	79	740868	1.7401	0.040923	0.503272
10494	STK25	2	242434122	242449145	79	21	740868	1.74	0.04093	0.503272
80169	CTC1	17	8128139	8151413	88	21	740868	1.7397	0.040954	0.503272
5799	PTPRN2	7	157331750	158380482	5579	351	740868	1.7395	0.040973	0.503272
220965	FAM13C	10	61005889	61122661	423	55	740868	1.7382	0.041085	0.504308
10657	KHDRBS1	1	32479295	32526460	67	41	740868	1.7379	0.041113	0.504312
9340	GLP2R	17	9729152	9794269	309	32	740868	1.7371	0.041187	0.50488
4077	NBR1	17	41322498	41363707	110	9	740868	1.7365	0.041237	0.505108
128272	ARHGEF19	1	16524599	16539104	75	12	740868	1.7362	0.041261	0.505108
100132146	FAM240A	3	46653925	46668033	96	23	740868	1.7347	0.041399	0.506386
2782	GNB1	1	1716725	1822552	278	39	740868	1.7344	0.041421	0.506386
114897	C1QTNF1	17	77019016	77045870	140	22	740868	1.7337	0.041483	0.506804
93	ACVR2B	3	38495790	38534633	152	24	740868	1.7331	0.041542	0.506882
1544	CYP1A2	15	75041184	75048941	26	12	740868	1.733	0.041545	0.506882
84272	YIPF4	2	32502958	32533074	110	30	740868	1.732	0.041638	0.507387
79993	ELOVL7	5	60047616	60140101	331	31	740868	1.7319	0.041642	0.507387
9672	SDC3	1	31342313	31381480	137	47	740868	1.7305	0.04177	0.508606
408187	SPINK14	5	147548109	147555182	23	5	740868	1.7301	0.041804	0.50868
57569	ARHGAP20	11	110447759	110583912	606	44	740868	1.7298	0.041834	0.508706
6251	RSU1	10	16632615	16859509	1142	107	740868	1.7293	0.041876	0.508877
6857	SYT1	12	79257773	79845788	1951	103	740868	1.729	0.041904	0.508878
7368	UGT8	4	115519611	115598202	263	31	740868	1.7285	0.041953	0.508887
57198	ATP8B2	1	154298036	154323780	80	17	740868	1.7283	0.041971	0.508887
85007	PHYKPL	5	177635475	177659823	132	27	740868	1.7275	0.042038	0.508887
126868	MAB21L3	1	116654376	116677861	108	23	740868	1.7273	0.042059	0.508887
10282	BET1	7	93592082	93633693	92	26	740868	1.7266	0.042123	0.508887
768	CA9	9	35673915	35681156	33	15	740868	1.7264	0.04214	0.508887
282809	POC1B	12	89813495	89920039	389	30	740868	1.7263	0.042148	0.508887
65061	CDK15	2	202655177	202760273	375	66	740868	1.7262	0.042155	0.508887
83481	EPPK1	8	144939492	144952632	41	18	740868	1.7262	0.042156	0.508887
80816	ASXL3	18	31158541	31331159	590	48	740868	1.7256	0.04221	0.509202
760	CA2	8	86376131	86393721	41	14	740868	1.7251	0.042257	0.509432
115653	KIR3DL3	19	55235984	55248003	19	8	740868	1.7244	0.042316	0.509647
79884	MAP9	4	156263810	156298122	171	21	740868	1.724	0.042357	0.509647
719	C3AR1	12	8210919	8218955	15	7	740868	1.7238	0.042376	0.509647
63922	CHTF18	16	838622	848074	91	21	740868	1.7226	0.042481	0.509647
8925	HERC1	15	63900817	64126148	781	30	740868	1.7223	0.042504	0.509647
64760	FHIP2B	8	21946695	21962405	70	19	740868	1.7221	0.042529	0.509647
10520	ZNF211	19	58144535	58155409	83	6	740868	1.7207	0.042649	0.509647
8453	CUL2	10	35297479	35379570	301	23	740868	1.7204	0.042677	0.509647
7357	UGCG	9	114659206	114697649	255	38	740868	1.7204	0.042684	0.509647
101928093	LOC101928093	5	172182656	172189558	28	10	740868	1.7202	0.042694	0.509647
84894	LINGO1	15	77905369	77988490	357	43	740868	1.72	0.042719	0.509647
64091	POPDC2	3	119360899	119379437	108	20	740868	1.7195	0.042758	0.509647
5515	PPP2CA	5	133532148	133561950	126	14	740868	1.7193	0.04278	0.509647
401387	LRRD1	7	91774169	91808900	68	15	740868	1.719	0.042804	0.509647
8572	PDLIM4	5	131593351	131609147	67	16	740868	1.719	0.042811	0.509647
7134	TNNC1	3	52485107	52488057	8	3	740868	1.7187	0.042831	0.509647
5913	RAPSN	11	47459308	47470730	53	13	740868	1.7185	0.042851	0.509647
9529	BAG5	14	104022881	104029151	18	7	740868	1.7185	0.042856	0.509647
3195	TLX1	10	102891061	102897546	23	11	740868	1.7184	0.042866	0.509647
55024	BANK1	4	102711764	102995969	972	58	740868	1.7183	0.042868	0.509647
81	ACTN4	19	39138256	39221336	361	30	740868	1.7183	0.042869	0.509647
10894	LYVE1	11	10578712	10590365	53	18	740868	1.7181	0.04289	0.509647
199692	ZNF627	19	11708235	11729974	93	14	740868	1.7171	0.042978	0.509969
136991	ASZ1	7	117003276	117067577	128	28	740868	1.717	0.042993	0.509969
54805	CNNM2	10	104678075	104838344	588	35	740868	1.7169	0.043001	0.509969
93145	OLFM2	19	9964394	10047070	349	39	740868	1.7164	0.04304	0.5101
3872	KRT17	17	39775692	39780882	14	10	740868	1.7157	0.04311	0.510337
80975	TMPRSS5	11	113558268	113577151	79	19	740868	1.7152	0.043154	0.510337
352954	CASTOR3P	7	99798276	99869855	251	38	740868	1.7149	0.043183	0.510337
10168	ZNF197	3	44666511	44689963	60	15	740868	1.7148	0.043196	0.510337
5077	PAX3	2	223064606	223163715	426	62	740868	1.7147	0.0432	0.510337
2534	FYN	6	111981535	112194655	852	60	740868	1.7137	0.043288	0.511045
55805	LRP2BP	4	186285032	186318297	142	32	740868	1.713	0.04336	0.511516
2099	ESR1	6	152011631	152424409	1923	125	740868	1.7127	0.043384	0.511516
7975	MAFK	7	1570368	1582679	55	13	740868	1.7115	0.043493	0.512207
8364	H4C3	6	26104176	26104565	3	2	740868	1.7112	0.043524	0.512207
391059	FRRS1	1	100174206	100232186	317	19	740868	1.7111	0.04353	0.512207
5646	PRSS3	9	33750464	33799229	189	35	740868	1.7108	0.043555	0.512207
8200	GDF5	20	34021149	34026027	13	4	740868	1.7094	0.04369	0.513402
222537	HS3ST5	6	114376750	114663540	927	102	740868	1.7091	0.043713	0.513402
23471	TRAM1	8	71485453	71520694	112	21	740868	1.7073	0.043881	0.514445
57157	PHTF2	7	77428109	77586821	475	41	740868	1.7069	0.043921	0.514445
80313	LRRC27	10	134145614	134195010	268	26	740868	1.7061	0.043991	0.514445
11024	LILRA1	19	55105041	55113846	71	10	740868	1.7059	0.044013	0.514445
6423	SFRP2	4	154701742	154710228	30	13	740868	1.7059	0.044015	0.514445
326	AIRE	21	45705721	45718102	69	25	740868	1.7057	0.044035	0.514445
9531	BAG3	10	121410859	121437331	127	25	740868	1.7055	0.044054	0.514445
91522	COL23A1	5	177664617	178017573	1907	178	740868	1.7054	0.044064	0.514445
50651	SLC45A1	1	8378171	8404227	103	19	740868	1.7053	0.044069	0.514445
1188	CLCNKB	1	16370231	16383821	147	18	740868	1.7051	0.044084	0.514445
5902	RANBP1	22	20103461	20114880	46	17	740868	1.7042	0.044168	0.514941
63915	BLOC1S5	6	8013800	8064647	397	23	740868	1.7041	0.044183	0.514941
57799	RAB40C	16	639357	679273	181	20	740868	1.7037	0.044215	0.514944
6878	TAF6	7	99704693	99717481	36	13	740868	1.7032	0.044264	0.514944
440050	KRTAP5-7	11	71238313	71239210	5	3	740868	1.7027	0.044309	0.514944
154150	HDGFL1	6	22569678	22570750	5	2	740868	1.7025	0.044328	0.514944
55852	TEX2	17	62224795	62340653	343	21	740868	1.7023	0.044354	0.514944
57216	VANGL2	1	160370364	160398468	75	16	740868	1.7021	0.044369	0.514944
10463	SLC30A9	4	41992516	42089551	452	18	740868	1.702	0.044381	0.514944
54487	DGCR8	22	20067755	20099400	144	22	740868	1.7007	0.0445	0.515996
4642	MYO1D	17	30819628	31203902	1181	99	740868	1.7002	0.044546	0.516012
23258	DENND5A	11	9160372	9286882	457	39	740868	1.7001	0.044558	0.516012
23353	SUN1	7	855194	914557	403	37	740868	1.6993	0.044629	0.516506
284119	CAVIN1	17	40554467	40575506	100	17	740868	1.6987	0.044686	0.516591
26060	APPL1	3	57261765	57307499	133	30	740868	1.6986	0.044693	0.516591
286257	PAXX	9	139886870	139888428	2	1	740868	1.6971	0.044835	0.517904
283375	SLC39A5	12	56623820	56631630	12	3	740868	1.6956	0.04498	0.519002
2312	FLG	1	152274651	152297679	127	20	740868	1.6955	0.044987	0.519002
101927764	LOC101927764	2	120480782	120517323	112	29	740868	1.6951	0.04503	0.519169
26229	B3GAT3	11	62382768	62389647	11	7	740868	1.6946	0.045075	0.519337
93627	TBCK	4	106967233	107237861	855	34	740868	1.6943	0.045105	0.519337
6326	SCN2A	2	165986659	166248820	1179	87	740868	1.694	0.04513	0.519337
51016	EMC9	14	24608081	24610837	9	4	740868	1.6932	0.045206	0.519566
10056	FARSB	2	223436162	223520827	256	29	740868	1.6928	0.045246	0.519566
3816	KLK1	19	51322402	51327043	24	7	740868	1.6924	0.045288	0.519566
27179	IL36A	2	113763038	113766221	9	4	740868	1.6918	0.045338	0.519566
58506	SCAF1	19	50145382	50161906	40	18	740868	1.6915	0.045368	0.519566
115817	DHRS1	14	24759804	24769039	33	9	740868	1.6911	0.045407	0.519566
2658	GDF2	10	48413092	48416853	7	3	740868	1.6906	0.045458	0.519566
283489	CHAMP1	13	115079965	115092803	42	11	740868	1.6904	0.045474	0.519566
2821	GPI	19	34855645	34893318	113	29	740868	1.6904	0.04548	0.519566
4056	LTC4S	5	179219263	179223616	19	11	740868	1.6903	0.045486	0.519566
54797	MED18	1	28655513	28662478	14	8	740868	1.6902	0.04549	0.519566
55270	NUDT15	13	48611703	48621282	40	17	740868	1.6899	0.045519	0.519566
84561	SLC12A8	3	124801480	124931609	799	95	740868	1.6895	0.04556	0.519566
219736	STOX1	10	70587294	70655209	300	38	740868	1.6894	0.045573	0.519566
912	CD1D	1	158147828	158156217	22	6	740868	1.6891	0.045596	0.519566
25759	SHC2	19	416583	460996	258	38	740868	1.689	0.045606	0.519566
10217	CTDSPL	3	37903669	38025960	435	48	740868	1.6884	0.045669	0.519959
27173	SLC39A1	1	153931575	153940660	18	8	740868	1.6876	0.045747	0.520224
5608	MAP2K6	17	67410838	67538470	471	81	740868	1.6874	0.045759	0.520224
3866	KRT15	17	39669997	39678033	21	5	740868	1.6867	0.045831	0.520224
151473	SLC16A14	2	230899690	230933715	160	25	740868	1.6867	0.045832	0.520224
29946	SERTAD3	19	40946748	40950282	21	6	740868	1.6867	0.045835	0.520224
10071	MUC12	7	100612904	100662230	164	29	740868	1.6857	0.045926	0.520933
125111	GJD3	17	38516904	38520945	13	4	740868	1.6846	0.046029	0.52169
100128071	FAM229A	1	32826871	32827844	1	1	740868	1.6844	0.04605	0.52169
6147	RPL23A	17	27047000	27051374	11	6	740868	1.6841	0.046083	0.52174
1571	CYP2E1	10	135340300	135352627	72	12	740868	1.6834	0.046145	0.52211
7060	THBS4	5	79331170	79379111	174	22	740868	1.6832	0.046173	0.52211
23760	PITPNB	22	28247657	28315255	169	26	740868	1.6819	0.046294	0.522754
10848	PPP1R13L	19	45882892	45909787	80	26	740868	1.6816	0.046326	0.522754
4898	NRDC	1	52254864	52344609	291	35	740868	1.6816	0.046328	0.522754
6513	SLC2A1	1	43391046	43424847	158	25	740868	1.6813	0.046349	0.522754
285971	ZNF775	7	150076406	150095719	79	14	740868	1.681	0.046379	0.522754
80128	TRIM46	1	155145702	155157447	28	14	740868	1.6808	0.046402	0.522754
146909	KIF18B	17	43002079	43025079	91	27	740868	1.6801	0.046464	0.522937
352909	DNAAF3	19	55670029	55678090	45	13	740868	1.6798	0.046502	0.522937
441459	ANKRD18B	9	33524347	33602658	389	60	740868	1.6796	0.046521	0.522937
3617	IMPG1	6	76631062	76782335	526	68	740868	1.6794	0.046533	0.522937
3565	IL4	5	132009678	132018370	28	6	740868	1.679	0.046573	0.522951
59274	TLNRD1	15	81293295	81296345	7	4	740868	1.6787	0.046606	0.522951
10644	IGF2BP2	3	185361527	185542827	463	72	740868	1.6785	0.046622	0.522951
8531	YBX3	12	10851676	10876047	94	18	740868	1.6783	0.046649	0.522951
6657	SOX2	3	181429712	181432224	3	2	740868	1.6774	0.046728	0.523468
2339	FNTA	8	42911442	42940931	69	20	740868	1.6769	0.046777	0.523468
574016	CLLU1-AS1	12	92813870	92821924	38	9	740868	1.6766	0.046806	0.523468
6625	SNRNP70	19	49588465	49611870	77	31	740868	1.6766	0.04681	0.523468
29842	TFCP2L1	2	121974163	122042778	268	37	740868	1.6763	0.04684	0.523482
129138	ANKRD54	22	38226862	38240353	40	12	740868	1.6759	0.046876	0.52353
90485	ZNF835	19	57173729	57183151	57	8	740868	1.6753	0.046939	0.52353
116541	MRPL54	19	3762665	3767563	27	9	740868	1.6747	0.046996	0.52353
6203	RPS9	19	54704608	54711515	75	7	740868	1.6747	0.046997	0.52353
220296	HEPACAM	11	124789089	124806308	63	27	740868	1.6743	0.047036	0.52353
23313	KIAA0930	22	45588123	45636650	285	35	740868	1.6742	0.047046	0.52353
2326	FMO1	1	171217610	171255113	150	35	740868	1.6739	0.047073	0.52353
55863	TMEM126B	11	85339617	85347583	23	11	740868	1.6739	0.047074	0.52353
5564	PRKAB1	12	120105669	120119429	31	9	740868	1.6735	0.047118	0.523699
5782	PTPN12	7	77166773	77269388	365	26	740868	1.6724	0.047223	0.524465
206412	C6orf163	6	88054571	88075381	102	16	740868	1.6718	0.047281	0.524465
150274	HSCB	22	29138008	29153506	57	17	740868	1.6717	0.047288	0.524465
6000	RGS7	1	240938817	241520505	2750	215	740868	1.6716	0.047302	0.524465
7177	TPSAB1	16	1290678	1292555	1	1	740868	1.6702	0.04744	0.525676
81030	ZBP1	20	56178902	56195632	74	30	740868	1.6691	0.047545	0.526519
1903	S1PR3	9	91606324	91620070	57	23	740868	1.6688	0.047581	0.526598
9783	RIMS3	1	41086352	41131324	173	33	740868	1.668	0.047661	0.527163
65010	SLC26A6	3	48663156	48672926	27	8	740868	1.6673	0.047724	0.52754
3858	KRT10	17	38974369	38978863	17	8	740868	1.667	0.047759	0.527574
55753	OGDHL	10	50942687	50970425	113	20	740868	1.6667	0.047785	0.527574
51096	UTP18	17	49337897	49375294	139	24	740868	1.6661	0.047849	0.527961
3206	HOXA10	7	27210210	27219880	23	12	740868	1.6657	0.047884	0.528028
1282	COL4A1	13	110801310	110959496	925	107	740868	1.6651	0.047947	0.528051
340152	ZC3H12D	6	149768766	149806148	222	19	740868	1.6651	0.047948	0.528051
84650	EBPL	13	50234812	50265627	200	32	740868	1.6647	0.047988	0.528051
6169	RPL38	17	72199795	72206019	25	10	740868	1.6645	0.048002	0.528051
8870	IER3	6	30710976	30712327	7	4	740868	1.6641	0.048046	0.528076
10146	G3BP1	5	151151476	151184915	106	21	740868	1.6634	0.048112	0.528076
10608	MXD4	4	2249160	2263739	54	10	740868	1.663	0.048161	0.528076
9884	LRRC37A	17	44316744	44415160	232	9	740868	1.6626	0.048199	0.528076
121601	ANO4	12	101133841	101522419	1696	116	740868	1.6623	0.048225	0.528076
205147	AMER3	2	131513077	131525707	26	12	740868	1.6622	0.048241	0.528076
10050	SLC17A4	6	25754927	25781403	165	32	740868	1.662	0.048252	0.528076
64410	KLHL25	15	86302557	86338189	206	41	740868	1.662	0.048257	0.528076
27198	HCAR1	12	123212153	123215129	11	7	740868	1.6619	0.048265	0.528076
26012	NSMF	9	140342022	140353808	21	12	740868	1.6609	0.048369	0.528656
8883	NAE1	16	66836781	66864880	93	23	740868	1.6606	0.048393	0.528656
10381	TUBB3	16	89988417	90002505	73	17	740868	1.6605	0.048405	0.528656
3050	HBZ	16	192921	204504	41	12	740868	1.66	0.048453	0.528863
84250	SLF1	5	93953086	94033326	308	26	740868	1.6595	0.048509	0.529157
27030	MLH3	14	75480467	75518235	115	18	740868	1.6587	0.048584	0.529275
162239	ZFP1	16	75182392	75206132	159	21	740868	1.6586	0.048601	0.529275
8412	BCAR3	1	94027343	94312706	1212	57	740868	1.6583	0.048624	0.529275
100506012	PPP5D1P	19	46984045	47104457	572	79	740868	1.658	0.048654	0.529275
23307	FKBP15	9	115927800	115983641	283	26	740868	1.6579	0.048672	0.529275
262	AMD1	6	111135823	111216916	326	28	740868	1.6577	0.048694	0.529275
55814	BDP1	5	70751442	70863649	293	15	740868	1.6569	0.048771	0.529491
90861	JPT2	16	1728201	1752073	69	20	740868	1.6569	0.048772	0.529491
672	BRCA1	17	41196312	41277500	214	13	740868	1.6566	0.048802	0.529502
5599	MAPK8	10	49514682	49647403	414	36	740868	1.656	0.048858	0.529565
8455	ATRN	20	3451665	3631769	759	36	740868	1.6557	0.048895	0.529565
8992	ATP6V0E1	5	172410763	172461900	173	40	740868	1.6555	0.048911	0.529565
135295	SRSF12	6	89805678	89827800	142	20	740868	1.6554	0.048924	0.529565
754	PTTG1IP	21	46269500	46294487	180	43	740868	1.6543	0.049037	0.530473
114926	SMIM19	8	42396298	42408140	50	11	740868	1.6534	0.049129	0.531117
221914	GPC2	7	99767229	99774990	19	11	740868	1.653	0.049167	0.531117
120071	LARGE2	11	45943172	45950647	29	13	740868	1.6528	0.049184	0.531117
55228	PNMA8A	19	46969748	46974820	36	6	740868	1.652	0.049266	0.531688
399814	C10orf120	10	124457225	124459338	8	3	740868	1.6515	0.04932	0.531956
23181	DIP2A	21	47878862	47989926	509	33	740868	1.651	0.049368	0.532158
4200	ME2	18	48405432	48476165	223	36	740868	1.649	0.049577	0.533949
7579	ZSCAN20	1	33938232	33962105	82	16	740868	1.6486	0.04961	0.533949
79679	VTCN1	1	117686209	117753582	295	48	740868	1.6485	0.049622	0.533949
2027	ENO3	17	4853404	4860426	19	8	740868	1.6475	0.049731	0.534806
29930	PCDHB1	5	140430979	140433512	6	4	740868	1.6457	0.049911	0.535464
11054	OGFR	20	61436156	61445352	50	11	740868	1.6457	0.049911	0.535464
10216	PRG4	1	186265405	186283688	53	14	740868	1.6457	0.049913	0.535464
284161	GDPD1	17	57297828	57353331	145	20	740868	1.6456	0.049928	0.535464
56666	PANX2	22	50609160	50618724	41	18	740868	1.6454	0.049939	0.535464
2068	ERCC2	19	45854649	45873845	79	19	740868	1.6449	0.049998	0.53548
47	ACLY	17	40023169	40086795	125	14	740868	1.6446	0.050022	0.53548
149233	IL23R	1	67604590	67725662	455	49	740868	1.6444	0.050044	0.53548
143884	CWF19L2	11	107197071	107328572	600	36	740868	1.6443	0.050058	0.53548
3249	HPN	19	35531410	35557481	103	20	740868	1.6438	0.050111	0.535643
4017	LOXL2	8	23154410	23261722	920	55	740868	1.6431	0.050182	0.535643
254827	NAALADL2	3	174577095	175523428	4634	275	740868	1.6428	0.050212	0.535643
9689	BZW1	2	201676262	201688569	28	10	740868	1.6427	0.050222	0.535643
91683	SYT12	11	66790190	66818334	82	21	740868	1.6423	0.050263	0.535643
9720	CCDC144A	17	16593549	16678311	76	12	740868	1.6422	0.050278	0.535643
3268	AGFG2	7	100136834	100165843	66	21	740868	1.6422	0.050279	0.535643
1436	CSF1R	5	149432854	149492935	242	52	740868	1.6412	0.050376	0.535918
23070	CMTR1	6	37400907	37450637	135	36	740868	1.6411	0.050389	0.535918
128077	LIX1L	1	145477059	145501670	6	2	740868	1.6411	0.050393	0.535918
10097	ACTR2	2	65454829	65498387	155	23	740868	1.6398	0.050528	0.53704
5920	PLAAT4	11	63304273	63313930	12	8	740868	1.6383	0.050675	0.537652
390443	RNASE9	14	21024252	21029125	17	6	740868	1.6383	0.050676	0.537652
5756	TWF1	12	44187526	44200178	35	12	740868	1.6379	0.050723	0.537652
60672	MIIP	1	12079299	12092106	35	10	740868	1.6376	0.050751	0.537652
126003	TRAPPC5	19	7745707	7747748	8	4	740868	1.6374	0.050773	0.537652
5789	PTPRD	9	8314246	10612723	14549	588	740868	1.6372	0.050792	0.537652
6297	SALL2	14	21989231	22005337	45	12	740868	1.6364	0.05088	0.537652
84243	ZDHHC18	1	27153201	27184092	76	19	740868	1.6364	0.050883	0.537652
285346	ZNF852	3	44539924	44552222	25	13	740868	1.6359	0.050928	0.537652
8153	RND2	17	41177258	41184058	16	4	740868	1.6358	0.050945	0.537652
283373	ANKRD52	12	56631591	56652143	41	11	740868	1.6357	0.050948	0.537652
570	BAAT	9	104122699	104147287	82	15	740868	1.6356	0.050958	0.537652
4190	MDH1	2	63815743	63834331	50	10	740868	1.6355	0.050969	0.537652
10215	OLIG2	21	34398216	34401504	9	4	740868	1.6346	0.05107	0.538348
84628	NTNG2	9	135037334	135118224	312	47	740868	1.6343	0.051094	0.538348
10225	CD96	3	111260926	111384843	432	78	740868	1.6339	0.051142	0.538542
3215	HOXB5	17	46668619	46671103	10	5	740868	1.6332	0.051213	0.538567
6122	RPL3	22	39708887	39715670	36	12	740868	1.6328	0.051251	0.538567
85352	SHISAL1	22	44639545	44727470	483	93	740868	1.6328	0.051252	0.538567
129293	TRABD2A	2	85048774	85108369	256	23	740868	1.6327	0.05127	0.538567
103910	MYL12B	18	3262111	3278282	102	8	740868	1.6316	0.051382	0.538567
166378	AFG2A	4	123844225	124240605	2101	47	740868	1.6313	0.051412	0.538567
134288	TMEM174	5	72464080	72471073	24	10	740868	1.631	0.051443	0.538567
79644	SRD5A3	4	56212388	56239267	117	27	740868	1.631	0.051448	0.538567
100131827	ZNF717	3	75785868	75834709	127	17	740868	1.6307	0.051482	0.538567
25894	PLEKHG4	16	67311413	67323403	28	13	740868	1.6305	0.051494	0.538567
9955	HS3ST3A1	17	13399006	13505244	572	56	740868	1.6303	0.051524	0.538567
5727	PTCH1	9	98205264	98279247	256	28	740868	1.63	0.051548	0.538567
386677	KRTAP10-1	21	45959068	45960078	16	5	740868	1.63	0.051552	0.538567
100130520	CD300H	17	72556674	72563673	40	13	740868	1.6299	0.051558	0.538567
1104	RCC1	1	28832455	28865708	120	24	740868	1.6295	0.051601	0.538707
10370	CITED2	6	139693392	139695787	11	5	740868	1.6288	0.051679	0.539213
81025	GJA9	1	39339739	39347298	37	10	740868	1.628	0.051764	0.539791
79089	TMUB2	17	42264300	42269099	12	5	740868	1.6275	0.051817	0.540028
55002	TMCO3	13	114145308	114204544	467	22	740868	1.6272	0.051846	0.540028
442194	OR10C1	6	29407716	29408754	24	8	740868	1.6268	0.051894	0.540219
81846	SBF2	11	9800214	10315754	2617	65	740868	1.6262	0.051951	0.540504
138805	OR13F1	9	107266544	107267503	11	4	740868	1.6257	0.052007	0.540778
80232	WDR26	1	224572845	224622001	132	20	740868	1.6242	0.052162	0.541099
10664	CTCF	16	67596310	67673088	231	55	740868	1.6242	0.052166	0.541099
113277	TMEM106A	17	41363865	41372061	15	5	740868	1.6242	0.052169	0.541099
5357	PLS1	3	142315229	142432506	437	39	740868	1.624	0.052189	0.541099
3805	KIR2DL4	19	55304500	55325972	37	6	740868	1.624	0.052191	0.541099
9557	CHD1L	1	146714291	146767447	237	27	740868	1.6237	0.052216	0.541099
10692	RRH	4	110749150	110765863	78	14	740868	1.6224	0.05236	0.541691
84706	GPT2	16	46918308	46965201	67	23	740868	1.6221	0.052388	0.541691
8350	H3C1	6	26020718	26021186	3	2	740868	1.6221	0.052392	0.541691
51075	TMX2	11	57479995	57508445	73	16	740868	1.6221	0.052392	0.541691
101927402	AFTPH-DT	2	64749323	64751744	7	4	740868	1.6198	0.052633	0.543874
80346	REEP4	8	21995533	21999448	17	9	740868	1.6195	0.052669	0.543938
221545	C6orf136	6	30614816	30620987	29	14	740868	1.6184	0.052788	0.544684
3661	IRF3	19	50162826	50169132	18	5	740868	1.6183	0.052801	0.544684
155465	AGR3	7	16899030	16921613	132	30	740868	1.6173	0.052905	0.545448
402381	SOHLH1	9	138585253	138591374	50	12	740868	1.6166	0.052982	0.545656
28954	REM1	20	30063091	30072708	23	10	740868	1.6166	0.052985	0.545656
202051	SPATA24	5	138731514	138739820	15	4	740868	1.6161	0.053034	0.545689
9648	GCC2	2	109065577	109125854	338	30	740868	1.6159	0.053057	0.545689
57459	GATAD2B	1	153777201	153895451	310	29	740868	1.6157	0.053078	0.545689
5054	SERPINE1	7	100770370	100782547	62	19	740868	1.6152	0.053137	0.545731
728215	NALF1	13	107820879	108519460	3551	289	740868	1.6151	0.053142	0.545731
57555	NLGN2	17	7311502	7323183	35	16	740868	1.6145	0.053208	0.54604
123096	SLC25A29	14	100745514	100772884	99	30	740868	1.6143	0.053232	0.54604
404734	ANKHD1-EIF4EBP3	5	139781399	139929163	330	36	740868	1.6139	0.053273	0.546153
100506084	ARL17B	17	44351550	44439416	85	7	740868	1.6135	0.053319	0.546317
83696	TRAPPC9	8	140740324	141468678	3269	250	740868	1.613	0.053368	0.546512
9681	DEPDC5	22	32149937	32303020	625	32	740868	1.6126	0.053412	0.546656
79623	GALNT14	2	31133331	31361592	1235	100	740868	1.6114	0.053549	0.546983
56981	PRDM11	11	45115564	45256675	438	53	740868	1.6113	0.05356	0.546983
8651	SOCS1	16	11348274	11350039	5	3	740868	1.6113	0.053562	0.546983
7143	TNR	1	175291935	175712752	1979	176	740868	1.6112	0.053573	0.546983
8073	PTP4A2	1	32372022	32403988	72	20	740868	1.611	0.053594	0.546983
22839	DLGAP4	20	34995444	35157040	342	78	740868	1.6106	0.053628	0.547024
653567	TMEM236	10	17794260	17842866	3	2	740868	1.6099	0.053709	0.547032
7181	NR2C1	12	95414005	95467404	190	40	740868	1.6098	0.053724	0.547032
9129	PRPF3	1	150293928	150325704	125	19	740868	1.6095	0.053756	0.547032
6898	TAT	16	71600754	71610998	31	14	740868	1.6093	0.053775	0.547032
119504	ANAPC16	10	73975758	73995618	66	12	740868	1.6092	0.053785	0.547032
29066	ZC3H7A	16	11844442	11891114	173	33	740868	1.6085	0.053863	0.547032
8833	GMPS	3	155588325	155657150	275	20	740868	1.6083	0.053883	0.547032
11120	BTN2A1	6	26458132	26476849	107	26	740868	1.6083	0.053889	0.547032
2045	EPHA7	6	93949738	94129302	654	88	740868	1.6082	0.053899	0.547032
25834	MGAT4C	12	86373037	87232681	3505	74	740868	1.6076	0.053963	0.547032
64863	METTL4	18	2537524	2571489	173	22	740868	1.6075	0.053969	0.547032
23041	MON2	12	62860597	62991363	483	43	740868	1.6066	0.054066	0.547032
1891	ECH1	19	39306062	39322497	78	20	740868	1.6065	0.054085	0.547032
23217	ZFR2	19	3804022	3869027	303	35	740868	1.6063	0.054107	0.547032
6209	RPS15	19	1438363	1440494	5	3	740868	1.6062	0.05411	0.547032
23682	RAB38	11	87846415	87908635	316	39	740868	1.6061	0.054131	0.547032
7153	TOP2A	17	38544773	38574202	65	14	740868	1.606	0.054139	0.547032
206338	LVRN	5	115298151	115363303	484	56	740868	1.6055	0.054192	0.547092
6827	SUPT4H1	17	56422536	56429599	26	8	740868	1.6054	0.054205	0.547092
84458	LCOR	10	98592017	98724198	297	39	740868	1.6048	0.05427	0.547445
283209	PGM2L1	11	74041361	74109502	281	23	740868	1.604	0.054359	0.54804
9313	MMP20	11	102447566	102496063	309	25	740868	1.6031	0.054455	0.548522
116988	AGAP3	7	150782918	150841523	237	47	740868	1.603	0.054467	0.548522
7589	ZSCAN21	7	99647390	99662663	30	8	740868	1.6025	0.054527	0.548823
170622	COMMD6	13	76099350	76111991	52	16	740868	1.6021	0.054563	0.548882
254050	LRRC43	12	122652266	122688018	128	25	740868	1.6016	0.054627	0.548908
89876	CFAP91	3	119421869	119485949	206	32	740868	1.6014	0.054646	0.548908
3340	NDST1	5	149865365	149937773	237	34	740868	1.6012	0.054666	0.548908
64324	NSD1	5	176560026	176727214	514	28	740868	1.601	0.054686	0.548908
10483	SEC23B	20	18488188	18542059	294	24	740868	1.6001	0.054784	0.549589
2528	FUT6	19	5830637	5839764	48	14	740868	1.5994	0.054867	0.549846
23505	TMEM131	2	98372799	98612389	783	35	740868	1.5994	0.05487	0.549846
23017	FAIM2	12	50260679	50297760	160	40	740868	1.5976	0.055068	0.550927
142685	ASB15	7	123241882	123277951	150	22	740868	1.5976	0.055071	0.550927
23151	GRAMD4	22	46973124	47078652	615	48	740868	1.5973	0.055094	0.550927
971	CD72	9	35609976	35618862	21	10	740868	1.5973	0.055101	0.550927
389763	SPATA31D1	9	84603687	84610171	21	11	740868	1.597	0.055129	0.550927
387522	PEDS1-UBE2V1	20	48697661	48770335	219	38	740868	1.5967	0.055166	0.550995
3802	KIR2DL1	19	55281265	55295778	4	2	740868	1.5962	0.055225	0.551086
3008	H1-4	6	26156559	26157343	4	2	740868	1.5956	0.055286	0.551086
390275	OR8A1	11	124439965	124440945	2	1	740868	1.5956	0.055287	0.551086
929	CD14	5	140011313	140013286	4	2	740868	1.5955	0.055296	0.551086
27246	RNF115	1	145610990	145689005	78	5	740868	1.5953	0.055328	0.551103
80204	FBXO11	2	48034059	48133524	435	38	740868	1.5946	0.055405	0.551569
55152	DALRD3	3	49052832	49058504	13	9	740868	1.593	0.055575	0.55159
55532	SLC30A10	1	220087606	220101993	49	14	740868	1.5929	0.055595	0.55159
55833	UBAP2	9	33921691	34048947	523	28	740868	1.5927	0.055617	0.55159
1080	CFTR	7	117120017	117308719	497	53	740868	1.5925	0.055631	0.55159
51696	HECA	6	139456249	139501946	167	22	740868	1.5921	0.055681	0.55159
80318	GKAP1	9	86354336	86444431	307	26	740868	1.592	0.055691	0.55159
7321	UBE2D1	10	60094739	60130513	115	28	740868	1.5919	0.0557	0.55159
114885	OSBPL11	3	125247702	125314381	298	21	740868	1.5916	0.055732	0.55159
10024	TROAP	12	49716971	49725514	31	11	740868	1.5916	0.055735	0.55159
129285	PPP1R21	2	48667908	48742531	343	38	740868	1.5916	0.055737	0.55159
169026	SLC30A8	8	117962512	118188953	721	55	740868	1.5916	0.05574	0.55159
245812	CNPY4	7	99717265	99723131	18	9	740868	1.5909	0.055817	0.552052
259173	ALS2CL	3	46710485	46735194	116	23	740868	1.5901	0.055905	0.552623
84103	C4orf17	4	100432161	100463460	191	36	740868	1.5894	0.055987	0.552804
90379	DCAF15	19	14063319	14072256	41	9	740868	1.5893	0.056	0.552804
3614	IMPDH1	7	128032331	128050045	73	19	740868	1.5888	0.056058	0.552804
81629	TSSK3	1	32818365	32830098	11	6	740868	1.5887	0.05606	0.552804
23097	CDK19	6	110931181	111136590	641	38	740868	1.5886	0.056075	0.552804
150726	FBXO41	2	73481810	73496758	41	18	740868	1.5883	0.056107	0.552821
389792	IER5L	9	131937831	131940540	4	2	740868	1.5873	0.056222	0.553655
8677	STX10	19	13254872	13261188	14	6	740868	1.5867	0.056291	0.554001
644974	ALG1L2	3	129800674	129817233	79	16	740868	1.5865	0.056318	0.554001
167153	TENT2	5	78908243	78982471	273	15	740868	1.5851	0.05647	0.555197
245973	ATP6V1C2	2	10861775	10925236	299	45	740868	1.5847	0.056516	0.55535
57165	GJC2	1	228337415	228347527	26	14	740868	1.5834	0.05667	0.556415
3987	LIMS1	2	109150811	109303702	646	34	740868	1.583	0.056714	0.556415
57407	NMRAL1	16	4511690	4524896	65	10	740868	1.583	0.056716	0.556415
57646	USP28	11	113668597	113746292	247	39	740868	1.582	0.056822	0.556757
5198	PFAS	17	8152596	8173809	91	26	740868	1.5816	0.056866	0.556757
8111	GPR68	14	91698876	91730898	145	22	740868	1.5815	0.056884	0.556757
353137	LCE1F	1	152748848	152749445	3	2	740868	1.5807	0.056977	0.556757
140460	ASB7	15	101142755	101191906	193	38	740868	1.5806	0.056986	0.556757
152404	IGSF11	3	118619477	118864915	1103	73	740868	1.5805	0.057001	0.556757
101927401	LOC101927401	1	228549180	228554500	31	8	740868	1.5801	0.057045	0.556757
54538	ROBO4	11	124754114	124767857	76	17	740868	1.5794	0.057127	0.556757
2662	GDF10	10	48425785	48439138	41	11	740868	1.5787	0.0572	0.556757
151242	PPP1R1C	2	182818968	182996109	676	73	740868	1.5786	0.057211	0.556757
347732	CATSPER3	5	134303596	134347397	161	37	740868	1.5786	0.057216	0.556757
10537	UBD	6	29523389	29527702	38	9	740868	1.578	0.057283	0.556757
51642	MRPL48	11	73498917	73575656	351	30	740868	1.5779	0.057293	0.556757
1345	COX6C	8	100890223	100906242	59	11	740868	1.5776	0.057325	0.556757
9063	PIAS2	18	44388900	44500130	392	29	740868	1.5775	0.057337	0.556757
7018	TF	3	133464977	133497850	153	26	740868	1.5773	0.057363	0.556757
474354	LRRC18	10	50117528	50147980	190	35	740868	1.5769	0.057409	0.556757
2593	GAMT	19	1397025	1401569	21	9	740868	1.5769	0.05741	0.556757
23107	MRPS27	5	71515236	71616084	249	47	740868	1.5764	0.057471	0.556757
63935	PCIF1	20	44563313	44576732	53	24	740868	1.5762	0.057486	0.556757
157697	ERICH1	8	606733	681226	569	48	740868	1.5762	0.057489	0.556757
54906	TASOR2	10	5726801	5807742	332	37	740868	1.5761	0.057503	0.556757
7443	VRK1	14	97263684	97347951	338	36	740868	1.576	0.057516	0.556757
54058	C21orf58	21	47720344	47743813	98	23	740868	1.576	0.057516	0.556757
5609	MAP2K7	19	7968665	7979363	52	21	740868	1.5758	0.057533	0.556757
147700	KLC3	19	45843998	45854864	42	13	740868	1.5757	0.057545	0.556757
11184	MAP4K1	19	39078281	39108643	125	26	740868	1.5754	0.057588	0.556824
3824	KLRD1	12	10457050	10469850	49	10	740868	1.5751	0.057613	0.556824
4149	MAX	14	65472819	65569413	403	51	740868	1.5746	0.057675	0.557128
23555	TSPAN15	10	71176821	71271569	511	30	740868	1.5742	0.057722	0.557281
440145	MZT1	13	73282495	73301938	80	12	740868	1.5739	0.057752	0.557281
22836	RHOBTB3	5	95049181	95132071	264	48	740868	1.5735	0.057796	0.55741
10814	CPLX2	5	175223542	175311024	329	54	740868	1.5725	0.057922	0.55833
87178	PNPT1	2	55861198	55921045	298	33	740868	1.5715	0.058029	0.559066
23414	ZFPM2	8	106330917	106816767	1651	143	740868	1.5711	0.058081	0.559104
1785	DNM2	19	10828729	10944169	463	53	740868	1.571	0.058095	0.559104
23062	GGA2	16	23474863	23521815	119	21	740868	1.5707	0.058125	0.559104
23523	CABIN1	22	24407642	24574596	406	44	740868	1.57	0.058205	0.559428
10360	NPM3	10	103541082	103543170	5	2	740868	1.5699	0.05822	0.559428
79692	ZNF322	6	26634611	26659980	113	21	740868	1.5693	0.058291	0.559476
11181	TREH	11	118528942	118550381	69	12	740868	1.5683	0.058406	0.559476
5549	PRELP	1	203444883	203460480	63	14	740868	1.5683	0.05841	0.559476
399512	SLC25A35	17	8191082	8198709	29	15	740868	1.5681	0.05843	0.559476
84233	TMEM126A	11	85358963	85367597	31	12	740868	1.5677	0.058474	0.559476
100527949	GIMAP1-GIMAP5	7	150413645	150440737	121	23	740868	1.5676	0.058482	0.559476
51317	PHF21A	11	45950870	46142985	510	37	740868	1.5676	0.058484	0.559476
124912	SPACA3	17	31318882	31324895	61	28	740868	1.5676	0.058493	0.559476
29799	YPEL1	22	22051825	22090071	144	31	740868	1.5675	0.058504	0.559476
162972	ZNF550	19	58053204	58071231	63	24	740868	1.5672	0.058532	0.559476
286256	LCN12	9	139844032	139849957	34	10	740868	1.5668	0.058576	0.55952
57205	ATP10D	4	47487296	47595503	515	51	740868	1.5667	0.058598	0.55952
29995	LMCD1	3	8543493	8609811	373	39	740868	1.5654	0.058748	0.560659
339745	SPOPL	2	139259350	139330805	173	33	740868	1.5642	0.058889	0.561424
1845	DUSP3	17	41843489	41856368	51	12	740868	1.5638	0.058929	0.561424
2879	GPX4	19	1103936	1106787	11	7	740868	1.5638	0.05893	0.561424
8704	B4GALT2	1	44444874	44456843	33	13	740868	1.5633	0.058985	0.561424
148534	TLCD4	1	95582894	95663163	327	36	740868	1.5632	0.058999	0.561424
54476	RNF216	7	5659672	5821361	808	42	740868	1.5631	0.059013	0.561424
7332	UBE2L3	22	21903736	21978323	163	14	740868	1.5623	0.059114	0.561472
10002	NR2E3	15	72102888	72110600	21	8	740868	1.5622	0.059123	0.561472
54535	CCHCR1	6	31110216	31126015	202	31	740868	1.562	0.059141	0.561472
400566	LIAT1	17	260118	264457	19	5	740868	1.5619	0.059161	0.561472
1140	CHRNB1	17	7348406	7360932	46	11	740868	1.5618	0.059172	0.561472
23385	NCSTN	1	160313063	160328742	60	19	740868	1.5605	0.059323	0.561476
81563	C1orf21	1	184356150	184598155	961	68	740868	1.5604	0.059329	0.561476
93273	LEMD1	1	205350506	205391214	189	22	740868	1.5603	0.059345	0.561476
29965	CDIP1	16	4560676	4588816	110	20	740868	1.5599	0.059387	0.561476
79696	ZC2HC1C	14	75535935	75544799	24	6	740868	1.5599	0.059388	0.561476
51574	LARP7	4	113558120	113578748	65	21	740868	1.5595	0.059444	0.561476
200879	LIPH	3	185225570	185270369	178	21	740868	1.5593	0.059464	0.561476
9600	PITPNM1	11	67259231	67272843	32	21	740868	1.5591	0.059482	0.561476
148738	HJV	1	145413191	145417545	1	1	740868	1.559	0.0595	0.561476
147339	ARK2N	18	43753519	43846955	325	27	740868	1.5583	0.059581	0.561476
200958	MUC20	3	195416293	195467004	81	15	740868	1.5576	0.059669	0.561476
85438	CABS1	4	71200671	71202833	6	2	740868	1.5575	0.059678	0.561476
83394	PITPNM3	17	6354583	6459877	473	47	740868	1.5574	0.059692	0.561476
220164	DOK6	18	67068284	67516323	2258	183	740868	1.5571	0.059727	0.561476
79701	OGFOD3	17	80347086	80376513	160	23	740868	1.5565	0.059789	0.561476
1440	CSF3	17	38171614	38174066	12	4	740868	1.5565	0.059792	0.561476
164832	LONRF2	2	100889753	100939195	284	22	740868	1.5565	0.059799	0.561476
7161	TP73	1	3569129	3652765	406	75	740868	1.5564	0.059804	0.561476
5989	RFX1	19	14072342	14117134	127	21	740868	1.5561	0.059846	0.561476
7091	TLE4	9	82186878	82341658	501	51	740868	1.5558	0.059881	0.561476
1479	CSTF3	11	33106130	33183037	248	25	740868	1.5557	0.059889	0.561476
2004	ELK3	12	96588207	96661606	281	48	740868	1.5553	0.059934	0.561476
84159	ARID5B	10	63661013	63856707	795	106	740868	1.5551	0.059959	0.561476
221421	RSPH9	6	43612767	43638935	125	19	740868	1.5542	0.060066	0.561476
27095	TRAPPC3	1	36602170	36621654	64	12	740868	1.5537	0.060127	0.561476
7517	XRCC3	14	104163945	104181823	71	20	740868	1.5537	0.06013	0.561476
51293	CD320	19	8367011	8373439	50	8	740868	1.5536	0.060141	0.561476
57504	MTA3	2	42721709	43011080	1026	44	740868	1.5532	0.06019	0.561476
2322	FLT3	13	28577411	28682904	558	27	740868	1.5525	0.060272	0.561476
167826	OLIG3	6	137813336	137815531	4	2	740868	1.5524	0.060279	0.561476
3344	FOXN2	2	48541783	48606434	282	27	740868	1.552	0.060329	0.561476
221074	SLC39A12	10	18240768	18332221	638	62	740868	1.5514	0.0604	0.561476
10950	BTG3	21	18965968	18985268	44	19	740868	1.5514	0.060404	0.561476
100506944	NA	3	88387565	88516299	689	46	740868	1.5513	0.060412	0.561476
56967	C14orf132	14	96505661	96560226	304	34	740868	1.5513	0.060421	0.561476
23334	SZT2	1	43855556	43919918	173	29	740868	1.5512	0.060428	0.561476
1894	ECT2	3	172468425	172539264	227	32	740868	1.551	0.060452	0.561476
118490	MSS51	10	75183337	75193319	37	4	740868	1.5509	0.060463	0.561476
148641	SLC35F3	1	234040679	234460262	2135	165	740868	1.5508	0.060477	0.561476
145482	PTGR2	14	74318534	74352168	171	16	740868	1.5507	0.060482	0.561476
7099	TLR4	9	120466453	120479769	43	17	740868	1.5507	0.060483	0.561476
8347	H2BC4	6	26113389	26124266	80	21	740868	1.5507	0.060486	0.561476
84618	NT5C1A	1	40124793	40137710	25	10	740868	1.5506	0.060497	0.561476
11331	PHB2	12	7074515	7079981	13	8	740868	1.5501	0.060563	0.561656
4643	MYO1E	15	59428168	59665071	1108	108	740868	1.5499	0.060578	0.561656
23255	MTCL1	18	8705659	8832776	636	97	740868	1.5494	0.060647	0.56201
7979	SEM1	7	96318079	96339203	70	17	740868	1.5491	0.060683	0.562058
79637	ARMC7	17	73106047	73126360	83	23	740868	1.5484	0.060758	0.562329
4627	MYH9	22	36677323	36784107	473	62	740868	1.5483	0.060774	0.562329
152206	CCDC13	3	42749764	42814745	228	32	740868	1.548	0.060815	0.562415
23553	HYAL4	7	123485220	123517532	104	34	740868	1.5477	0.060845	0.562415
94015	TTYH2	17	72209696	72258159	236	39	740868	1.5472	0.060912	0.562442
4863	NPAT	11	108028117	108093365	165	32	740868	1.547	0.060935	0.562442
64431	ACTR6	12	100593865	100618202	73	21	740868	1.5464	0.06101	0.562442
788	SLC25A20	3	48894356	48936426	72	21	740868	1.5462	0.061023	0.562442
56623	INPP5E	9	139323067	139334305	66	13	740868	1.5462	0.061031	0.562442
256949	KANK3	19	8387468	8408146	133	15	740868	1.5462	0.061033	0.562442
55506	MACROH2A2	10	71812357	71872040	246	47	740868	1.5456	0.061096	0.562584
7936	NELFE	6	31919864	31926864	30	15	740868	1.5454	0.061121	0.562584
2146	EZH2	7	148504464	148581441	227	41	740868	1.5453	0.061141	0.562584
253314	EIF4E1B	5	176057683	176073642	43	16	740868	1.5447	0.061215	0.56298
7052	TGM2	20	36756863	36794910	150	31	740868	1.5443	0.061253	0.563046
9445	ITM2B	13	48807274	48836232	90	25	740868	1.5426	0.061466	0.564719
388272	C16orf87	16	46835959	46865074	33	8	740868	1.5412	0.061634	0.565876
2998	GYS2	12	21684461	21783722	453	53	740868	1.541	0.061654	0.565876
100526664	LY75-CD302	2	160625139	160761267	736	59	740868	1.5406	0.06171	0.566092
4817	NIT1	1	161087862	161095235	15	8	740868	1.5403	0.06175	0.566092
4125	MAN2B1	19	12757322	12777591	54	19	740868	1.5399	0.061797	0.566092
51651	PTRH2	17	57774667	57784856	41	15	740868	1.5397	0.061813	0.566092
57017	COQ9	16	57481337	57495187	48	19	740868	1.5392	0.061879	0.566092
5731	PTGER1	19	14583278	14586174	17	6	740868	1.5391	0.061888	0.566092
10981	RAB32	6	146864828	146876086	36	12	740868	1.5389	0.061911	0.566092
5290	PIK3CA	3	178866311	178952500	333	35	740868	1.5388	0.061926	0.566092
3071	NCKAP1L	12	54891495	54936899	178	57	740868	1.5382	0.061996	0.566448
54840	APTX	9	32972604	33001639	106	13	740868	1.5372	0.062119	0.567009
27429	HTRA2	2	74756532	74760683	7	4	740868	1.5369	0.062159	0.567009
4826	NNAT	20	36149607	36152092	3	2	740868	1.5368	0.062166	0.567009
[truncated: 16,231 more rows]

## Sheet: STable5
Supplemental Table5 Pathways for ALS using MAGMA from Gene Ontology pathway database obtained from the MSigDB(P.fdr< 0.05).
FULL_NAME	TYPE	NGENES	BETA	BETA_STD	SE	P	P.fdr
GOBP_REGULATION_OF_SYNAPTIC_VESICLE_EXOCYTOSIS	SET	38	0.68981	0.031464	0.14393	8.3038e-07	0.00866917
GOBP_SYNAPTIC_VESICLE_EXOCYTOSIS	SET	91	0.40151	0.028299	0.087663	2.3392e-06	0.0122106
GOBP_REGULATION_OF_NEUROTRANSMITTER_TRANSPORT	SET	93	0.38567	0.027479	0.086718	4.3712e-06	0.0152118
GOBP_NEUROTRANSMITTER_SECRETION	SET	140	0.30894	0.026971	0.071541	7.9058e-06	0.0206341
GOBP_ESTABLISHMENT_OF_PROTEIN_LOCALIZATION	SET	1618	0.089335	0.025408	0.021135	1.191e-05	0.0248681
GOBP_NEGATIVE_REGULATION_OF_GLUCOSE_TRANSMEMBRANE_TRANSPORT	SET	18	0.88269	0.027725	0.21242	1.6317e-05	0.0259656
GOBP_REGULATION_OF_NEUROTRANSMITTER_SECRETION	SET	77	0.39958	0.025916	0.096563	1.7597e-05	0.0259656
GOBP_NEUROTRANSMITTER_TRANSPORT	SET	199	0.24819	0.025791	0.06039	1.9897e-05	0.0259656
GOBP_PROTEIN_TRANSPORT	SET	1349	0.092446	0.024201	0.023026	2.9856e-05	0.0343079
GOBP_CELLULAR_RESPONSE_TO_ALDEHYDE	SET	16	0.76134	0.022547	0.19071	3.2862e-05	0.0343079
GOBP_POST_GOLGI_VESICLE_MEDIATED_TRANSPORT	SET	108	0.31307	0.024027	0.079845	4.4268e-05	0.0420143563636364
GOCC_GLIAL_CELL_PROJECTION	SET	38	0.52575	0.023981	0.13869	7.5349e-05	0.0655536
GOCC_MITOCHONDRIAL_MATRIX	SET	480	0.13429	0.021504	0.035987	9.5406e-05	0.0766183569230769
GOBP_NEGATIVE_REGULATION_OF_VASCULAR_ASSOCIATED_SMOOTH_MUSCLE_CELL_MIGRATION	SET	11	1.0775	0.026461	0.29174	0.00011109	0.0815086
GOBP_CELLULAR_MODIFIED_AMINO_ACID_BIOSYNTHETIC_PROCESS	SET	43	0.47155	0.022876	0.12815	0.00011711	0.0815086
GOBP_NEGATIVE_REGULATION_OF_SMOOTH_MUSCLE_CELL_MIGRATION	SET	23	0.68009	0.024144	0.19023	0.00017557	0.110191129411765
GOBP_NEURON_PROJECTION_ORGANIZATION	SET	87	0.32662	0.022511	0.091506	0.00017943	0.110191129411765
GOBP_REGULATION_OF_PROTEIN_ADP_RIBOSYLATION	SET	8	0.96697	0.020254	0.27416	0.00021068	0.122194
GOBP_REGULATION_OF_REGULATED_SECRETORY_PATHWAY	SET	107	0.27268	0.020831	0.078745	0.00026789	0.139067
GOMF_BILE_ACID_SODIUM_SYMPORTER_ACTIVITY	SET	5	1.2474	0.020657	0.3622	0.00028747	0.139067
GOBP_REGULATION_OF_SYNAPTIC_TRANSMISSION_GLUTAMATERGIC	SET	72	0.36304	0.022772	0.10572	0.00029813	0.139067
GOBP_NEGATIVE_REGULATION_OF_GLUCOSE_IMPORT	SET	13	0.8492	0.022671	0.24806	0.00031003	0.139067
GOBP_CELLULAR_RESPONSE_TO_ALDOSTERONE	SET	7	1.2082	0.023672	0.3539	0.00032101	0.139067
GOCC_CALYX_OF_HELD	SET	18	0.71218	0.02237	0.20993	0.00034716	0.139067
GOBP_VESICLE_MEDIATED_TRANSPORT_IN_SYNAPSE	SET	213	0.19869	0.021353	0.058639	0.00035226	0.139067
GOBP_POSITIVE_REGULATION_OF_ESTABLISHMENT_OF_PROTEIN_LOCALIZATION	SET	313	0.15696	0.020391	0.046533	0.00037235	0.139067
GOBP_POSITIVE_REGULATION_OF_PROTEIN_TRANSPORT	SET	240	0.1796	0.020473	0.053476	0.00039261	0.139067
GOBP_VESICLE_LOCALIZATION	SET	207	0.19062	0.020198	0.05679	0.00039557	0.139067
GOBP_NEGATIVE_REGULATION_OF_STEROID_METABOLIC_PROCESS	SET	27	0.55267	0.021255	0.16498	0.00040513	0.139067
GOCC_LAMELLIPODIUM	SET	194	0.20142	0.020669	0.060267	0.00041648	0.139067
GOBP_ER_NUCLEUS_SIGNALING_PATHWAY	SET	46	0.4247	0.021309	0.12718	0.00042064	0.139067
GOCC_MITOCHONDRIAL_PROTEIN_CONTAINING_COMPLEX	SET	260	0.16149	0.019149	0.048412	0.00042626	0.139067
GOBP_POSITIVE_REGULATION_OF_TRANSPORT	SET	800	0.10087	0.020663	0.030398	0.00045391	0.142404582857143
GOBP_SYNAPTIC_TRANSMISSION_GLUTAMATERGIC	SET	103	0.29404	0.022042	0.088886	0.00047055	0.142404582857143
GOBP_REGULATION_OF_PROTEIN_TRANSPORT	SET	412	0.13863	0.020605	0.041956	0.00047741	0.142404582857143
GOBP_SIGNAL_RELEASE	SET	470	0.12949	0.020524	0.039492	0.00052194	0.151363
GOBP_ADULT_LOCOMOTORY_BEHAVIOR	SET	79	0.29941	0.019669	0.092541	0.00060837	0.170007157894737
GOCC_ORGANELLAR_RIBOSOME	SET	88	0.26727	0.018526	0.082732	0.0006188	0.170007157894737
GOBP_INTRACELLULAR_PH_ELEVATION	SET	7	0.91648	0.017957	0.28501	0.00065213	0.174570184615385
GOBP_CELL_MORPHOGENESIS_INVOLVED_IN_NEURON_DIFFERENTIATION	SET	556	0.12172	0.020932	0.038052	0.00069141	0.180458
GOBP_PIGMENT_CELL_DIFFERENTIATION	SET	35	0.49447	0.021647	0.15587	0.00075723	0.192816614634146
GOCC_MITOCHONDRIAL_ENVELOPE	SET	755	0.091809	0.018294	0.029254	0.00085102	0.210550520930233
GOBP_MYELIN_MAINTENANCE	SET	16	0.65485	0.019393	0.20903	0.00086721	0.210550520930233
GOBP_MELANOCYTE_DIFFERENTIATION	SET	24	0.59593	0.02161	0.19094	0.00090238	0.214110163636364
GOBP_POSITIVE_REGULATION_OF_PROTEIN_LOCALIZATION_TO_SYNAPSE	SET	6	1.137	0.020625	0.36578	0.00094201	0.218546
GOBP_REGULATION_OF_GLUCOSE_TRANSMEMBRANE_TRANSPORT	SET	73	0.30653	0.01936	0.098978	0.00097917	0.219260470588235
GOCC_MITOCHONDRION	SET	1582	0.065385	0.018408	0.021159	0.0010018	0.219260470588235
GOBP_SECRETORY_GRANULE_LOCALIZATION	SET	22	0.57488	0.01996	0.18672	0.0010409	0.219260470588235
GOBP_CELLULAR_RESPONSE_TO_LAMINAR_FLUID_SHEAR_STRESS	SET	7	1.0862	0.021283	0.3531	0.0010496	0.219260470588235
GOBP_ESTABLISHMENT_OF_LOCALIZATION_IN_CELL	SET	1865	0.06035	0.01829	0.019628	0.0010555	0.219260470588235
GOCC_BETA_CATENIN_DESTRUCTION_COMPLEX	SET	12	0.78211	0.020061	0.25474	0.0010711	0.219260470588235
GOBP_NITROGEN_COMPOUND_TRANSPORT	SET	1793	0.06194	0.018447	0.020362	0.0011767	0.221554
GOMF_BILE_ACID_TRANSMEMBRANE_TRANSPORTER_ACTIVITY	SET	20	0.64352	0.021305	0.21159	0.0011792	0.221554
GOCC_PRESYNAPTIC_CYTOSOL	SET	12	0.7714	0.019787	0.25428	0.0012097	0.221554
GOBP_POSITIVE_REGULATION_OF_PROTEIN_LOCALIZATION	SET	462	0.11606	0.018241	0.038259	0.0012108	0.221554
GOCC_ASTROCYTE_PROJECTION	SET	21	0.56659	0.019221	0.18696	0.0012227	0.221554
GOBP_REGULATION_OF_EXOCYTOSIS	SET	163	0.19506	0.018363	0.064495	0.0012475	0.221554
GOMF_MRNA_METHYLTRANSFERASE_ACTIVITY	SET	13	0.64637	0.017256	0.21385	0.0012552	0.221554
GOCC_MITOCHONDRIAL_LARGE_RIBOSOMAL_SUBUNIT	SET	56	0.30217	0.016723	0.10008	0.0012693	0.221554
GOBP_REGULATION_OF_ESTABLISHMENT_OF_PROTEIN_LOCALIZATION	SET	505	0.11352	0.018633	0.037613	0.0012733	0.221554
GOBP_DENSE_CORE_GRANULE_EXOCYTOSIS	SET	10	0.83737	0.019608	0.27863	0.0013284	0.227352393442623
GOBP_POSITIVE_REGULATION_OF_RECEPTOR_MEDIATED_ENDOCYTOSIS	SET	51	0.3393	0.017923	0.11436	0.0015057	0.2495
GOBP_REGULATION_OF_INTRACELLULAR_TRANSPORT	SET	251	0.151	0.017597	0.050958	0.0015247	0.2495
GOBP_DENDRITIC_SPINE_MORPHOGENESIS	SET	54	0.34506	0.018754	0.11649	0.0015295	0.2495
GOBP_NON_CANONICAL_WNT_SIGNALING_PATHWAY	SET	69	0.30287	0.0186	0.1026	0.0015805	0.252347454545455
GOBP_LAMELLIPODIUM_ASSEMBLY	SET	64	0.30609	0.018106	0.10379	0.0015953	0.252347454545455
GOBP_MONOSACCHARIDE_TRANSMEMBRANE_TRANSPORT	SET	118	0.22987	0.018436	0.078142	0.001634	0.254611343283582
GOBP_NEGATIVE_REGULATION_OF_ALCOHOL_BIOSYNTHETIC_PROCESS	SET	14	0.65815	0.018233	0.22439	0.0016802	0.257960117647059
GOBP_ENDOMEMBRANE_SYSTEM_ORGANIZATION	SET	576	0.099584	0.017421	0.034057	0.0017298	0.261726260869565
GOBP_VESICLE_CYTOSKELETAL_TRAFFICKING	SET	58	0.31142	0.017539	0.10693	0.0017961	0.267875485714286
GOBP_PROTEIN_LOCALIZATION_TO_CYTOSKELETON	SET	59	0.28415	0.01614	0.097934	0.0018594	0.273410366197183
GOBP_PROTEIN_LOCALIZATION_TO_EXTRACELLULAR_REGION	SET	362	0.12864	0.017948	0.044701	0.002005	0.289960273972603
GOCC_ORGANELLE_INNER_MEMBRANE	SET	517	0.099411	0.016503	0.034587	0.0020275	0.289960273972603
GOBP_INSULIN_SECRETION	SET	194	0.17216	0.017666	0.060125	0.0020983	0.296030432432432
GOBP_REGULATED_EXOCYTOSIS	SET	214	0.16027	0.017264	0.056499	0.0022815	0.315194307692308
GOBP_NEURON_PROJECTION_GUIDANCE	SET	225	0.16814	0.018565	0.059345	0.0023064	0.315194307692308
GOBP_REGULATION_OF_KETONE_BIOSYNTHETIC_PROCESS	SET	21	0.49793	0.016892	0.17609	0.0023466	0.315194307692308
GOBP_DENDRITIC_SPINE_DEVELOPMENT	SET	87	0.26483	0.018253	0.093691	0.0023549	0.315194307692308
GOMF_INTERLEUKIN_2_RECEPTOR_BINDING	SET	5	0.8427	0.013955	0.29988	0.0024791	0.322286666666667
GOCC_TRANS_GOLGI_NETWORK	SET	251	0.14094	0.016425	0.05017	0.0024857	0.322286666666667
GOBP_APICAL_JUNCTION_ASSEMBLY	SET	74	0.27357	0.017396	0.097447	0.0025005	0.322286666666667
GOMF_HISTONE_H3_KINASE_ACTIVITY	SET	11	0.74511	0.018299	0.26646	0.0025874	0.329420195121951
GOMF_SULFATIDE_BINDING	SET	6	0.69918	0.012683	0.2526	0.002824	0.354114857142857
GOBP_RESPONSE_TO_GLYCOPROTEIN	SET	11	0.70371	0.017282	0.25451	0.0028492	0.354114857142857
GOBP_NEGATIVE_REGULATION_OF_GLYCOGEN_METABOLIC_PROCESS	SET	7	0.88678	0.017375	0.32203	0.0029488	0.359815813953488
GOCC_CELL_LEADING_EDGE	SET	411	0.11516	0.017096	0.041843	0.002964	0.359815813953488
GOBP_GOLGI_TO_LYSOSOME_TRANSPORT	SET	12	0.65622	0.016832	0.23936	0.0030601	0.367212
GOBP_INTRACELLULAR_PROTEIN_TRANSPORT	SET	647	0.086921	0.016083	0.031783	0.0031236	0.369959
GOBP_PERIPHERAL_NERVOUS_SYSTEM_MYELIN_MAINTENANCE	SET	9	0.7011	0.015575	0.25683	0.0031712	0.369959
GOBP_SYNAPTIC_VESICLE_MEMBRANE_ORGANIZATION	SET	27	0.40005	0.015386	0.14665	0.0031893	0.369959
GOBP_RESPONSE_TO_OXIDATIVE_STRESS	SET	376	0.11528	0.016386	0.042432	0.0032979	0.375386086956522
GOBP_HEMIDESMOSOME_ASSEMBLY	SET	6	0.94427	0.017129	0.34768	0.003308	0.375386086956522
GOBP_CARBOHYDRATE_TRANSPORT	SET	134	0.19778	0.016896	0.073114	0.0034171	0.379154969072165
GOBP_CELL_PROJECTION_MORPHOGENESIS	SET	634	0.095836	0.01756	0.035447	0.0034328	0.379154969072165
GOBP_RELAXATION_OF_VASCULAR_ASSOCIATED_SMOOTH_MUSCLE	SET	5	1.0318	0.017086	0.38264	0.0035079	0.379154969072165
GOBP_POSITIVE_REGULATION_OF_RESPONSE_TO_ENDOPLASMIC_RETICULUM_STRESS	SET	35	0.36267	0.015877	0.13451	0.0035101	0.379154969072165
GOBP_PROTEIN_INSERTION_INTO_ER_MEMBRANE	SET	28	0.41055	0.016079	0.15234	0.0035228	0.379154969072165
GOCC_CLATHRIN_SCULPTED_GAMMA_AMINOBUTYRIC_ACID_TRANSPORT_VESICLE	SET	8	0.82934	0.017371	0.30862	0.0036054	0.384085469387755
GOCC_NPBAF_COMPLEX	SET	14	0.60591	0.016786	0.22657	0.0037482	0.395264727272727
GOBP_SYNAPTIC_VESICLE_TRANSPORT	SET	41	0.3539	0.016766	0.13252	0.0037897	0.395645
GOBP_NEGATIVE_REGULATION_OF_CELL_PROJECTION_ORGANIZATION	SET	165	0.17809	0.016867	0.066816	0.0038493	0.39788803960396
GOBP_GOLGI_VESICLE_TRANSPORT	SET	290	0.12547	0.0157	0.047306	0.0040011	0.402993849056604
GOCC_DENSE_CORE_GRANULE	SET	38	0.38971	0.017776	0.14698	0.0040103	0.402993849056604
GOBP_REGULATION_OF_LYSOSOMAL_LUMEN_PH	SET	28	0.35431	0.013876	0.13365	0.0040154	0.402993849056604
GOBP_REGULATION_OF_POSTSYNAPSE_ORGANIZATION	SET	100	0.23107	0.017068	0.087336	0.0040795	0.402993849056604
GOBP_REGULATION_OF_NUCLEOCYTOPLASMIC_TRANSPORT	SET	109	0.20637	0.015911	0.078031	0.0040917	0.402993849056604
GOMF_SYNTAXIN_1_BINDING	SET	19	0.52535	0.016953	0.19929	0.0041969	0.404880440366973
GOBP_PEPTIDE_TRANSPORT	SET	252	0.14141	0.016512	0.053671	0.0042132	0.404880440366973
GOCC_INTRACELLULAR_PROTEIN_CONTAINING_COMPLEX	SET	864	0.071592	0.015213	0.027183	0.0042272	0.404880440366973
GOMF_TAU_PROTEIN_KINASE_ACTIVITY	SET	22	0.45878	0.015929	0.17546	0.0044685	0.419812285714286
GOBP_REGULATION_OF_RESPONSE_TO_ENDOPLASMIC_RETICULUM_STRESS	SET	78	0.22733	0.014839	0.08704	0.0045073	0.419812285714286
GOBP_NEURONAL_DENSE_CORE_VESICLE_EXOCYTOSIS	SET	7	0.86743	0.016996	0.33236	0.0045317	0.419812285714286
GOBP_ENDOPLASMIC_RETICULUM_ORGANIZATION	SET	97	0.21291	0.01549	0.081667	0.0045703	0.419812285714286
GOBP_NEUTROPHIL_MEDIATED_IMMUNITY	SET	37	0.34226	0.015405	0.13152	0.0046341	0.419812285714286
GOCC_NBAF_COMPLEX	SET	16	0.56467	0.016723	0.21782	0.0047695	0.419812285714286
GOBP_NEGATIVE_REGULATION_OF_CHOLESTEROL_METABOLIC_PROCESS	SET	6	0.90101	0.016345	0.3476	0.0047741	0.419812285714286
GOBP_MITOCHONDRIAL_TRANSLATION	SET	129	0.17456	0.014633	0.067455	0.0048346	0.419812285714286
GOBP_POSITIVE_REGULATION_OF_EMBRYONIC_DEVELOPMENT	SET	21	0.44606	0.015132	0.17252	0.0048651	0.419812285714286
GOBP_INTRACELLULAR_TRANSPORT	SET	1293	0.059078	0.015167	0.022874	0.0049053	0.419812285714286
GOBP_ADULT_BEHAVIOR	SET	142	0.18578	0.016334	0.071953	0.0049161	0.419812285714286
GOBP_VASCULAR_ASSOCIATED_SMOOTH_MUSCLE_CELL_MIGRATION	SET	27	0.46157	0.017752	0.17903	0.0049705	0.419812285714286
GOBP_NEGATIVE_REGULATION_OF_WNT_SIGNALING_PATHWAY	SET	163	0.175	0.016475	0.067909	0.0049883	0.419812285714286
GOMF_THREONINE_TYPE_PEPTIDASE_ACTIVITY	SET	17	0.54797	0.016727	0.21282	0.0050193	0.419812285714286
GOBP_PHOSPHOLIPASE_C_ACTIVATING_G_PROTEIN_COUPLED_ACETYLCHOLINE_RECEPTOR_SIGNALING_PATHWAY	SET	8	0.88665	0.018571	0.34449	0.005034	0.419812285714286
GOCC_MULTIVESICULAR_BODY_INTERNAL_VESICLE	SET	6	0.95969	0.017409	0.37317	0.0050636	0.419812285714286
GOMF_RIBOSOME_BINDING	SET	98	0.20183	0.01476	0.078487	0.0050667	0.419812285714286
GOBP_NEGATIVE_REGULATION_OF_NEURON_PROJECTION_DEVELOPMENT	SET	119	0.19984	0.016094	0.078055	0.0052342	0.427758923076923
GOBP_POSITIVE_REGULATION_OF_TRANSLATION	SET	119	0.18651	0.015021	0.072949	0.0052883	0.427758923076923
GOBP_PROTEIN_TRANSMEMBRANE_TRANSPORT	SET	70	0.24254	0.015001	0.094927	0.0053139	0.427758923076923
GOBP_CELLULAR_DETOXIFICATION_OF_ALDEHYDE	SET	9	0.57838	0.012849	0.22645	0.0053265	0.427758923076923
GOBP_SYNAPTIC_VESICLE_LOCALIZATION	SET	54	0.2973	0.016158	0.11672	0.0054347	0.428377764705882
GOBP_REGULATION_OF_SHORT_TERM_NEURONAL_SYNAPTIC_PLASTICITY	SET	14	0.55234	0.015302	0.21725	0.0055086	0.428377764705882
GOBP_DEVELOPMENTAL_PIGMENTATION	SET	46	0.33069	0.016592	0.13009	0.0055167	0.428377764705882
GOBP_POSITIVE_REGULATION_OF_INSULIN_SECRETION	SET	83	0.22829	0.01537	0.089857	0.0055377	0.428377764705882
GOMF_OMEGA_PEPTIDASE_ACTIVITY	SET	13	0.58411	0.015594	0.22997	0.0055472	0.428377764705882
GOBP_REGULATION_OF_NEURON_PROJECTION_ARBORIZATION	SET	14	0.56733	0.015717	0.22354	0.0055804	0.428377764705882
GOCC_CIS_GOLGI_NETWORK_MEMBRANE	SET	10	0.56497	0.01323	0.22342	0.005728	0.433940869565217
GOMF_PHOSPHOFRUCTOKINASE_ACTIVITY	SET	6	0.77385	0.014038	0.30608	0.005736	0.433940869565217
GOBP_REGULATION_OF_TRANSPORT	SET	1508	0.056923	0.015681	0.022617	0.0059248	0.444999366906475
GOBP_POSITIVE_REGULATION_OF_INTRACELLULAR_PROTEIN_TRANSPORT	SET	90	0.21674	0.015193	0.08621	0.0059706	0.445236171428571
GOCC_RNA_POLYMERASE_COMPLEX	SET	97	0.18638	0.01356	0.074286	0.0060586	0.445853
GOCC_TRANSFERASE_COMPLEX	SET	796	0.070132	0.014332	0.027989	0.0061156	0.445853
GOCC_GOLGI_APPARATUS_SUBCOMPARTMENT	SET	363	0.10619	0.014836	0.042399	0.0061351	0.445853
GOCC_PRESYNAPTIC_MEMBRANE	SET	161	0.17545	0.016417	0.070076	0.0061497	0.445853
GOBP_REGULATION_OF_CYTOKINETIC_PROCESS	SET	7	0.7459	0.014615	0.29841	0.0062212	0.447926
GOBP_RESPONSE_TO_TOPOLOGICALLY_INCORRECT_PROTEIN	SET	149	0.16798	0.015126	0.067595	0.00648	0.458908540540541
GOBP_REGULATION_OF_TOLL_SIGNALING_PATHWAY	SET	5	1.0969	0.018165	0.4415	0.0064907	0.458908540540541
GOBP_RELAXATION_OF_SMOOTH_MUSCLE	SET	8	0.74819	0.015671	0.30124	0.0065056	0.458908540540541
GOBP_AMINE_TRANSPORT	SET	92	0.2256	0.015987	0.091158	0.0066698	0.461745298013245
GOBP_MYELOID_PROGENITOR_CELL_DIFFERENTIATION	SET	9	0.73195	0.016261	0.29579	0.006675	0.461745298013245
GOBP_LAMELLIPODIUM_ORGANIZATION	SET	83	0.2286	0.015391	0.092386	0.0066785	0.461745298013245
GOBP_POSITIVE_REGULATION_OF_PEPTIDE_SECRETION	SET	110	0.19599	0.015179	0.079416	0.0068005	0.467086973684211
GOBP_NAD_CATABOLIC_PROCESS	SET	20	0.46438	0.015374	0.18859	0.0069054	0.471192
GOMF_BETA_CATENIN_BINDING	SET	101	0.21821	0.016198	0.088794	0.0070001	0.474552233766234
GOMF_NUCLEOCYTOPLASMIC_CARRIER_ACTIVITY	SET	32	0.35816	0.014994	0.14665	0.0073008	0.486801341772152
GOMF_PROTEIN_KINASE_A_BINDING	SET	50	0.30763	0.01609	0.12599	0.0073119	0.486801341772152
GOBP_NEGATIVE_REGULATION_OF_CARDIAC_MUSCLE_TISSUE_GROWTH	SET	20	0.51365	0.017005	0.21049	0.0073441	0.486801341772152
GOBP_REGULATION_OF_MALE_GONAD_DEVELOPMENT	SET	8	0.81252	0.017019	0.33313	0.0073673	0.486801341772152
GOBP_RESPONSE_TO_INTERLEUKIN_3	SET	6	0.86646	0.015718	0.35574	0.0074368	0.488303094339623
GOCC_POLYPRENYL_DIPHOSPHATE_SYNTHASE_COMPLEX	SET	10	0.52003	0.012177	0.21411	0.0075796	0.494569
GOBP_PIGMENTATION	SET	107	0.19508	0.014903	0.08043	0.0076506	0.495387157894737
GOMF_GTPASE_BINDING	SET	297	0.11319	0.014331	0.046725	0.0077115	0.495387157894737
GOBP_PHOSPHATIDYLGLYCEROL_METABOLIC_PROCESS	SET	33	0.36052	0.015326	0.14898	0.0077653	0.495387157894737
GOBP_REGULATION_OF_GLYCOGEN_STARCH_SYNTHASE_ACTIVITY	SET	4	0.98472	0.014586	0.40736	0.007822	0.495387157894737
GOBP_NEGATIVE_REGULATION_OF_STRIATED_MUSCLE_CELL_APOPTOTIC_PROCESS	SET	26	0.3828	0.014448	0.15851	0.007874	0.495387157894737
GOBP_DENDRITE_MORPHOGENESIS	SET	133	0.18336	0.015606	0.07602	0.0079367	0.495387157894737
GOCC_RNA_POLYMERASE_II_CORE_COMPLEX	SET	14	0.47253	0.013091	0.19598	0.0079555	0.495387157894737
GOBP_NEGATIVE_REGULATION_OF_ENDOTHELIAL_CELL_APOPTOTIC_PROCESS	SET	33	0.39059	0.016605	0.16205	0.0079742	0.495387157894737
GOBP_REGULATION_OF_LEUKOCYTE_TETHERING_OR_ROLLING	SET	18	0.48532	0.015244	0.20158	0.0080336	0.495387157894737
GOBP_NEGATIVE_REGULATION_OF_MUSCLE_CELL_APOPTOTIC_PROCESS	SET	43	0.31253	0.015162	0.1299	0.0080722	0.495387157894737
GOBP_PROTEIN_LOCALIZATION_TO_ORGANELLE	SET	926	0.065621	0.01441	0.027297	0.0081141	0.495387157894737
GOBP_POSITIVE_REGULATION_OF_LIPOPROTEIN_PARTICLE_CLEARANCE	SET	6	0.94019	0.017055	0.39179	0.0082087	0.498249
GOBP_DNA_LIGATION	SET	16	0.46618	0.013806	0.19469	0.0083268	0.498664227272727
GOBP_VESICLE_TRANSPORT_ALONG_MICROTUBULE	SET	46	0.28962	0.014531	0.12102	0.0083551	0.498664227272727
GOBP_CONSTITUTIVE_SECRETORY_PATHWAY	SET	7	0.63043	0.012352	0.26345	0.0083614	0.498664227272727
GOBP_7_METHYLGUANOSINE_RNA_CAPPING	SET	7	0.68519	0.013425	0.28657	0.0084066	0.498664227272727
GOBP_REGULATION_OF_PH	SET	97	0.19019	0.013838	0.079727	0.0085327	0.502720043478261
GOBP_RIBOSOMAL_SMALL_SUBUNIT_EXPORT_FROM_NUCLEUS	SET	8	0.8266	0.017314	0.34719	0.008643	0.502720043478261
GOBP_POST_ANAL_TAIL_MORPHOGENESIS	SET	18	0.445	0.013977	0.18699	0.0086649	0.502720043478261
GOMF_OXIDIZED_DNA_BINDING	SET	11	0.58036	0.014253	0.24419	0.0087403	0.502720043478261
GOCC_CHROMOSOME_CENTROMERIC_CORE_DOMAIN	SET	16	0.5107	0.015124	0.21508	0.0087933	0.502720043478261
GOBP_REGULATION_OF_CELLULAR_LOCALIZATION	SET	935	0.065421	0.014432	0.027572	0.0088333	0.502720043478261
GOBP_POSITIVE_REGULATION_OF_LEUKOCYTE_TETHERING_OR_ROLLING	SET	13	0.54126	0.01445	0.22821	0.0088557	0.502720043478261
GOBP_TRANSMEMBRANE_TRANSPORT	SET	1474	0.054241	0.014788	0.022871	0.0088602	0.502720043478261
GOCC_PIGMENT_GRANULE	SET	107	0.1855	0.014171	0.078292	0.0089159	0.503145924324324
GOBP_ORGANONITROGEN_COMPOUND_BIOSYNTHETIC_PROCESS	SET	1614	0.049513	0.014066	0.020926	0.0089943	0.50484135483871
GOBP_POSITIVE_REGULATION_OF_INTRINSIC_APOPTOTIC_SIGNALING_PATHWAY_IN_RESPONSE_TO_DNA_DAMAGE	SET	7	0.66679	0.013065	0.28398	0.0094423	0.526719978947368
GOBP_PARKIN_MEDIATED_STIMULATION_OF_MITOPHAGY_IN_RESPONSE_TO_MITOCHONDRIAL_DEPOLARIZATION	SET	5	1.0064	0.016667	0.42917	0.0095166	0.526719978947368
GOBP_REGULATION_OF_DENDRITIC_SPINE_MORPHOGENESIS	SET	41	0.31823	0.015076	0.13581	0.0095664	0.526719978947368
GOMF_BENZODIAZEPINE_RECEPTOR_BINDING	SET	2	1.5278	0.016003	0.65224	0.0095859	0.526719978947368
GOMF_CULLIN_FAMILY_PROTEIN_BINDING	SET	23	0.36567	0.012981	0.1563	0.0096594	0.52747
GOBP_L_GLUTAMATE_IMPORT	SET	39	0.33347	0.015409	0.14263	0.0097006	0.52747
GOBP_CALCIUM_ION_REGULATED_EXOCYTOSIS_OF_NEUROTRANSMITTER	SET	21	0.42113	0.014286	0.18077	0.0099181	0.536502404145078
GOBP_SYNAPTIC_VESICLE_DOCKING	SET	9	0.60366	0.013411	0.26044	0.010236	0.544916
GOBP_NEGATIVE_REGULATION_OF_SMALL_MOLECULE_METABOLIC_PROCESS	SET	102	0.18722	0.013966	0.080832	0.01028	0.544916
GOBP_CALMODULIN_DEPENDENT_KINASE_SIGNALING_PATHWAY	SET	12	0.56231	0.014423	0.24295	0.010325	0.544916
GOBP_CENTRAL_NERVOUS_SYSTEM_NEURON_DIFFERENTIATION	SET	172	0.16566	0.016016	0.071582	0.010334	0.544916
GOCC_ORGANELLE_ENVELOPE	SET	1202	0.05504	0.01366	0.023791	0.010354	0.544916
GOBP_REGULATION_OF_HIGH_DENSITY_LIPOPROTEIN_PARTICLE_CLEARANCE	SET	4	1.0037	0.014868	0.43442	0.010435	0.544916
GOBP_REGULATION_OF_REMOVAL_OF_SUPEROXIDE_RADICALS	SET	6	0.84168	0.015268	0.3643	0.010439	0.544916
GOBP_ACIDIC_AMINO_ACID_TRANSPORT	SET	66	0.25228	0.015154	0.10989	0.01085	0.560689411764706
GOBP_MITOCHONDRIAL_PROTEIN_CATABOLIC_PROCESS	SET	10	0.53909	0.012624	0.235	0.010902	0.560689411764706
GOBP_BILE_ACID_AND_BILE_SALT_TRANSPORT	SET	29	0.36266	0.014454	0.15816	0.010933	0.560689411764706
GOMF_GTP_DEPENDENT_PROTEIN_BINDING	SET	20	0.42477	0.014063	0.18532	0.010956	0.560689411764706
GOBP_NEGATIVE_REGULATION_OF_CARDIAC_MUSCLE_CELL_PROLIFERATION	SET	10	0.69555	0.016287	0.30421	0.01112	0.566306341463415
GOCC_CLATHRIN_COATED_PIT	SET	75	0.22525	0.014419	0.098638	0.011203	0.566937391304348
GOCC_MYELIN_SHEATH	SET	43	0.27583	0.013381	0.12085	0.011241	0.566937391304348
GOMF_SELENIUM_BINDING	SET	9	0.69024	0.015334	0.30326	0.011429	0.573647884615385
GOMF_HISTONE_H2A_DEUBIQUITINASE_ACTIVITY	SET	5	0.69104	0.011444	0.30481	0.011697	0.58429033492823
GOBP_POSTSYNAPSE_ORGANIZATION	SET	185	0.14367	0.014401	0.063438	0.011769	0.585087428571429
GOBP_PROSTATE_GLAND_GROWTH	SET	10	0.69504	0.016276	0.30828	0.012087	0.595811775700935
GOBP_NEGATIVE_REGULATION_OF_UBIQUITIN_PROTEIN_TRANSFERASE_ACTIVITY	SET	15	0.45448	0.013032	0.20167	0.012116	0.595811775700935
GOBP_INTERMEDIATE_FILAMENT_BASED_PROCESS	SET	94	0.24372	0.017457	0.10823	0.012174	0.595811775700935
GOBP_G0_TO_G1_TRANSITION	SET	36	0.31082	0.0138	0.13811	0.012213	0.595811775700935
GOMF_AP_2_ADAPTOR_COMPLEX_BINDING	SET	10	0.63079	0.014771	0.28053	0.012276	0.596099720930233
GOBP_TRANSLATION	SET	629	0.071105	0.012979	0.031725	0.01251	0.598591210762332
GOBP_POSITIVE_REGULATION_OF_EXTRINSIC_APOPTOTIC_SIGNALING_PATHWAY_IN_ABSENCE_OF_LIGAND	SET	9	0.64466	0.014321	0.28795	0.012591	0.598591210762332
GOBP_REGULATION_OF_PEPTIDE_TRANSPORT	SET	195	0.13765	0.014161	0.061485	0.012591	0.598591210762332
GOBP_DENDRITIC_CELL_DIFFERENTIATION	SET	46	0.28054	0.014076	0.12547	0.012686	0.598591210762332
GOBP_REGULATION_OF_INTRACELLULAR_PROTEIN_TRANSPORT	SET	142	0.15379	0.013522	0.068798	0.0127	0.598591210762332
GOMF_MANNOSIDASE_ACTIVITY	SET	15	0.47147	0.01352	0.21098	0.012727	0.598591210762332
GOMF_PROTEIN_SERINE_THREONINE_TYROSINE_KINASE_ACTIVITY	SET	42	0.29046	0.013927	0.13007	0.012778	0.598591210762332
GOBP_CELLULAR_RESPONSE_TO_PROGESTERONE_STIMULUS	SET	7	0.7496	0.014687	0.33572	0.012786	0.598591210762332
GOMF_CYSTEINE_TYPE_ENDOPEPTIDASE_ACTIVATOR_ACTIVITY	SET	5	0.85515	0.014162	0.3836	0.012904	0.600231615720524
GOBP_REGULATION_OF_SECRETION	SET	581	0.079909	0.014038	0.035905	0.013029	0.600231615720524
GOBP_CELLULAR_RESPONSE_TO_TOPOLOGICALLY_INCORRECT_PROTEIN	SET	100	0.18141	0.0134	0.081536	0.013052	0.600231615720524
GOBP_REGULATION_OF_INSULIN_SECRETION	SET	163	0.14831	0.013963	0.06672	0.013116	0.600231615720524
GOBP_REGULATION_OF_DENDRITIC_SPINE_DEVELOPMENT	SET	53	0.27675	0.014902	0.12456	0.013154	0.600231615720524
GOBP_REGULATION_OF_HYDROLASE_ACTIVITY	SET	659	0.075763	0.014143	0.034105	0.013166	0.600231615720524
GOBP_POSITIVE_REGULATION_OF_RECEPTOR_INTERNALIZATION	SET	25	0.37573	0.013905	0.16929	0.013235	0.600753913043478
GOBP_NEGATIVE_REGULATION_OF_DEVELOPMENTAL_GROWTH	SET	85	0.21425	0.014597	0.096685	0.013355	0.601695
GOMF_RNA_POLYMERASE_II_ACTIVITY	SET	10	0.49376	0.011562	0.22287	0.013371	0.601695
GOBP_POSITIVE_REGULATION_OF_CYTOPLASMIC_TRANSLATION	SET	15	0.4628	0.013271	0.2096	0.013629	0.608965544554455
GOBP_WNT_SIGNALING_PATHWAY_PLANAR_CELL_POLARITY_PATHWAY	SET	48	0.27221	0.013951	0.12349	0.01376	0.608965544554455
GOBP_RESPONSE_TO_AXON_INJURY	SET	79	0.21333	0.014014	0.096844	0.01381	0.608965544554455
GOBP_GOLGI_TO_PLASMA_MEMBRANE_PROTEIN_TRANSPORT	SET	42	0.28366	0.013601	0.12879	0.013819	0.608965544554455
GOCC_GROWTH_CONE_MEMBRANE	SET	8	0.65184	0.013653	0.29634	0.013923	0.608965544554455
GOBP_RIBOSOMAL_SUBUNIT_EXPORT_FROM_NUCLEUS	SET	15	0.48434	0.013889	0.22026	0.01395	0.608965544554455
GOBP_REGULATION_OF_STEROID_METABOLIC_PROCESS	SET	94	0.19345	0.013856	0.088093	0.014054	0.608965544554455
GOMF_METAL_CATION_MONOATOMIC_CATION_ANTIPORTER_ACTIVITY	SET	39	0.2966	0.013705	0.13511	0.014079	0.608965544554455
GOBP_NEUTROPHIL_MEDIATED_CYTOTOXICITY	SET	15	0.49116	0.014084	0.22391	0.014139	0.608965544554455
GOBP_HORMONE_TRANSPORT	SET	314	0.10594	0.013784	0.048317	0.014177	0.608965544554455
GOBP_CELLULAR_RESPONSE_TO_CHEMICAL_STRESS	SET	297	0.10536	0.01334	0.048133	0.014303	0.608965544554455
GOBP_CHOLANGIOCYTE_PROLIFERATION	SET	4	0.86045	0.012745	0.39344	0.014378	0.608965544554455
GOBP_REGULATION_OF_ENDOPLASMIC_RETICULUM_STRESS_INDUCED_INTRINSIC_APOPTOTIC_SIGNALING_PATHWAY	SET	31	0.28988	0.011945	0.13268	0.014458	0.608965544554455
GOCC_BRAHMA_COMPLEX	SET	14	0.5168	0.014317	0.23671	0.014516	0.608965544554455
GOBP_ESTABLISHMENT_OF_PROTEIN_LOCALIZATION_TO_MEMBRANE	SET	258	0.11028	0.013027	0.05052	0.014527	0.608965544554455
GOBP_TRANSFERRIN_TRANSPORT	SET	10	0.53807	0.0126	0.24715	0.014745	0.608965544554455
GOBP_EMBRYONIC_PLACENTA_MORPHOGENESIS	SET	26	0.41001	0.015475	0.18835	0.01475	0.608965544554455
GOBP_AEROBIC_RESPIRATION	SET	168	0.12827	0.012258	0.058979	0.014824	0.608965544554455
GOBP_GALACTOLIPID_METABOLIC_PROCESS	SET	9	0.53481	0.011881	0.24598	0.014851	0.608965544554455
GOBP_NEGATIVE_REGULATION_OF_STEROID_HORMONE_BIOSYNTHETIC_PROCESS	SET	6	0.84006	0.015239	0.38662	0.014904	0.608965544554455
GOBP_CATECHOLAMINE_SECRETION	SET	48	0.27291	0.013987	0.12591	0.015102	0.608965544554455
GOBP_TIGHT_JUNCTION_ORGANIZATION	SET	79	0.20607	0.013537	0.095077	0.015109	0.608965544554455
GOBP_REGULATION_OF_LAMELLIPODIUM_ORGANIZATION	SET	47	0.26594	0.013487	0.12321	0.01545	0.608965544554455
GOBP_NEGATIVE_REGULATION_OF_HORMONE_BIOSYNTHETIC_PROCESS	SET	10	0.57517	0.013469	0.26661	0.015495	0.608965544554455
GOBP_VESICLE_MEDIATED_TRANSPORT	SET	1474	0.048248	0.013154	0.02237	0.015515	0.608965544554455
GOCC_CLUSTER_OF_ACTIN_BASED_CELL_PROJECTIONS	SET	161	0.14699	0.013754	0.068211	0.01559	0.608965544554455
GOBP_SPINAL_CORD_MOTOR_NEURON_DIFFERENTIATION	SET	28	0.38317	0.015007	0.17787	0.015617	0.608965544554455
GOCC_FILAMENTOUS_ACTIN	SET	32	0.31653	0.013251	0.14696	0.015633	0.608965544554455
GOBP_DOUBLE_STRAND_BREAK_REPAIR_VIA_SINGLE_STRAND_ANNEALING	SET	6	0.74669	0.013545	0.34673	0.015646	0.608965544554455
GOBP_NEURON_DEVELOPMENT	SET	1097	0.057996	0.013793	0.026947	0.015696	0.608965544554455
GOCC_BBAF_COMPLEX	SET	10	0.58529	0.013705	0.27206	0.015733	0.608965544554455
GOBP_ESTABLISHMENT_OF_LYMPHOCYTE_POLARITY	SET	16	0.47852	0.014171	0.22273	0.015846	0.608965544554455
GOBP_PROTEIN_LOCALIZATION_TO_PRESYNAPSE	SET	10	0.51885	0.01215	0.24193	0.015998	0.608965544554455
GOBP_TAIL_ANCHORED_MEMBRANE_PROTEIN_INSERTION_INTO_ER_MEMBRANE	SET	15	0.41094	0.011784	0.19164	0.016008	0.608965544554455
GOBP_RESPONSE_TO_MANGANESE_ION	SET	17	0.42899	0.013095	0.20009	0.016025	0.608965544554455
GOBP_REGULATION_OF_GLUCOSE_IMPORT	SET	55	0.24501	0.013439	0.11432	0.016055	0.608965544554455
GOBP_CENTRAL_NERVOUS_SYSTEM_NEURON_DEVELOPMENT	SET	82	0.22212	0.014865	0.10364	0.016058	0.608965544554455
GOBP_NEGATIVE_REGULATION_OF_VASCULAR_ENDOTHELIAL_CELL_PROLIFERATION	SET	5	0.94654	0.015675	0.44275	0.016272	0.608965544554455
GOBP_PERK_MEDIATED_UNFOLDED_PROTEIN_RESPONSE	SET	20	0.41557	0.013758	0.19457	0.016352	0.608965544554455
GOCC_PRESYNAPSE	SET	548	0.078209	0.013355	0.036619	0.016357	0.608965544554455
GOBP_CELLULAR_RESPONSE_TO_REACTIVE_OXYGEN_SPECIES	SET	140	0.14788	0.01291	0.069272	0.016398	0.608965544554455
GOBP_POSITIVE_REGULATION_OF_GLIAL_CELL_PROLIFERATION	SET	19	0.41398	0.013359	0.19395	0.016407	0.608965544554455
GOBP_REGULATION_OF_PHOSPHATASE_ACTIVITY	SET	51	0.24897	0.013151	0.11664	0.016408	0.608965544554455
GOBP_GOLGI_TO_PLASMA_MEMBRANE_TRANSPORT	SET	64	0.22094	0.013069	0.10353	0.016428	0.608965544554455
GOBP_LABYRINTHINE_LAYER_DEVELOPMENT	SET	44	0.29642	0.014546	0.13892	0.016439	0.608965544554455
GOBP_MONOUBIQUITINATED_PROTEIN_DEUBIQUITINATION	SET	8	0.56879	0.011914	0.26658	0.016441	0.608965544554455
GOMF_MONOCARBOXYLATE_SODIUM_SYMPORTER_ACTIVITY	SET	13	0.51054	0.01363	0.23932	0.016456	0.608965544554455
GOBP_REGULATION_OF_GONAD_DEVELOPMENT	SET	12	0.56928	0.014602	0.26688	0.016464	0.608965544554455
GOBP_CHONDROCYTE_DEVELOPMENT	SET	32	0.35131	0.014707	0.16473	0.016482	0.608965544554455
GOBP_WNT_SIGNALING_PATHWAY	SET	430	0.089317	0.013556	0.041907	0.016538	0.608965544554455
GOCC_PERIKARYON	SET	143	0.15449	0.01363	0.072593	0.01667	0.608965544554455
GOBP_ASSOCIATIVE_LEARNING	SET	86	0.19872	0.013618	0.093454	0.016743	0.608965544554455
GOBP_PHOSPHATIDYLGLYCEROL_BIOSYNTHETIC_PROCESS	SET	9	0.56651	0.012585	0.26656	0.01679	0.608965544554455
GOMF_PRENYLTRANSFERASE_ACTIVITY	SET	16	0.39797	0.011786	0.18746	0.016885	0.608965544554455
GOBP_REGULATION_OF_SYNAPSE_STRUCTURE_OR_ACTIVITY	SET	236	0.12098	0.013677	0.057139	0.017125	0.608965544554455
GOMF_UBIQUITIN_LIGASE_COMPLEX_SCAFFOLD_ACTIVITY	SET	6	0.76853	0.013941	0.36314	0.017164	0.608965544554455
GOBP_REGULATION_OF_ENDOPLASMIC_RETICULUM_TUBULAR_NETWORK_ORGANIZATION	SET	6	0.69687	0.012641	0.32938	0.017192	0.608965544554455
GOBP_GLUCOSE_IMPORT	SET	74	0.20752	0.013196	0.098132	0.017233	0.608965544554455
GOMF_RNA_POLYMERASE_ACTIVITY	SET	31	0.25697	0.010589	0.12153	0.017247	0.608965544554455
GOBP_COLLATERAL_SPROUTING	SET	26	0.35176	0.013276	0.16661	0.01738	0.608965544554455
GOBP_REGULATION_OF_DOPAMINE_SECRETION	SET	25	0.38183	0.014132	0.18086	0.017386	0.608965544554455
GOBP_NEGATIVE_REGULATION_OF_LIPASE_ACTIVITY	SET	11	0.5846	0.014357	0.27715	0.017463	0.608965544554455
GOBP_TOXIN_METABOLIC_PROCESS	SET	15	0.47569	0.013641	0.22573	0.017552	0.608965544554455
GOBP_REGULATION_OF_WNT_SIGNALING_PATHWAY_PLANAR_CELL_POLARITY_PATHWAY	SET	15	0.49993	0.014336	0.23725	0.01756	0.608965544554455
GOBP_SYNAPTIC_VESICLE_RECYCLING	SET	77	0.19552	0.012681	0.092807	0.017577	0.608965544554455
GOCC_CATALYTIC_COMPLEX	SET	1622	0.043234	0.01231	0.020529	0.017607	0.608965544554455
GOCC_ORGANELLE_SUBCOMPARTMENT	SET	1456	0.047127	0.012777	0.022386	0.017643	0.608965544554455
GOBP_CATECHOLAMINE_TRANSPORT	SET	63	0.22685	0.013314	0.10777	0.017658	0.608965544554455
GOBP_POSITIVE_REGULATION_OF_NEUTROPHIL_MIGRATION	SET	30	0.30951	0.012546	0.14706	0.01767	0.608965544554455
GOBP_REGULATION_OF_TRANSLATIONAL_INITIATION	SET	77	0.1881	0.0122	0.089377	0.017672	0.608965544554455
GOBP_ATF6_MEDIATED_UNFOLDED_PROTEIN_RESPONSE	SET	8	0.54867	0.011492	0.26071	0.017674	0.608965544554455
GOBP_NEGATIVE_REGULATION_OF_GROWTH	SET	209	0.12658	0.013477	0.060252	0.017834	0.610091764705882
GOBP_TRICARBOXYLIC_ACID_CYCLE	SET	29	0.34234	0.013644	0.16303	0.017878	0.610091764705882
GOMF_MISFOLDED_PROTEIN_BINDING	SET	15	0.43116	0.012364	0.20534	0.017882	0.610091764705882
GOBP_RESPONSE_TO_CARBOHYDRATE	SET	220	0.11591	0.012658	0.055248	0.017958	0.610688990228013
GOBP_MEMBRANE_DOCKING	SET	84	0.18721	0.01268	0.089333	0.018062	0.612231428571429
GOBP_POSITIVE_REGULATION_OF_PROTEIN_LOCALIZATION_TO_MEMBRANE	SET	102	0.16883	0.012594	0.080712	0.018239	0.613710868167203
GOBP_LIPOPROTEIN_METABOLIC_PROCESS	SET	133	0.15079	0.012834	0.072116	0.018273	0.613710868167203
GOBP_PROTEIN_LOCALIZATION_TO_CENP_A_CONTAINING_CHROMATIN	SET	15	0.48723	0.013972	0.23304	0.018282	0.613710868167203
GOBP_LOCOMOTORY_BEHAVIOR	SET	199	0.12383	0.012868	0.059444	0.018629	0.617752409638554
GOBP_REGULATION_OF_HORMONE_LEVELS	SET	524	0.07855	0.013126	0.037748	0.018727	0.617752409638554
GOBP_AUDITORY_RECEPTOR_CELL_MORPHOGENESIS	SET	21	0.38545	0.013076	0.18531	0.018771	0.617752409638554
GOBP_REDUCTION_OF_FOOD_INTAKE_IN_RESPONSE_TO_DIETARY_EXCESS	SET	6	0.6794	0.012325	0.32731	0.018968	0.617752409638554
GOCC_POSTSYNAPTIC_ENDOSOME_MEMBRANE	SET	4	0.90033	0.013336	0.43391	0.019004	0.617752409638554
GOBP_CARDIOLIPIN_BIOSYNTHETIC_PROCESS	SET	7	0.59751	0.011707	0.28822	0.019089	0.617752409638554
GOBP_POSITIVE_REGULATION_OF_ADENYLATE_CYCLASE_ACTIVATING_G_PROTEIN_COUPLED_RECEPTOR_SIGNALING_PATHWAY	SET	6	0.74533	0.013521	0.35967	0.019128	0.617752409638554
GOMF_PHOSPHOLIPASE_A1_ACTIVITY	SET	18	0.43504	0.013664	0.21006	0.019185	0.617752409638554
GOBP_GLYCOLYTIC_PROCESS_THROUGH_FRUCTOSE_6_PHOSPHATE	SET	22	0.36909	0.012815	0.17829	0.019223	0.617752409638554
GOBP_CELLULAR_RESPONSE_TO_MANGANESE_ION	SET	10	0.50234	0.011763	0.24265	0.019224	0.617752409638554
GOBP_FATTY_ACID_BETA_OXIDATION_USING_ACYL_COA_DEHYDROGENASE	SET	12	0.43679	0.011204	0.21102	0.019239	0.617752409638554
GOBP_POSITIVE_REGULATION_OF_EXOCYTOSIS	SET	73	0.19823	0.01252	0.095901	0.019372	0.617752409638554
GOBP_REGULATION_OF_DENDRITIC_CELL_DIFFERENTIATION	SET	14	0.45124	0.012501	0.21834	0.01939	0.617752409638554
GOCC_PROTEIN_PHOSPHATASE_TYPE_2A_COMPLEX	SET	17	0.41065	0.012535	0.19875	0.019411	0.617752409638554
GOBP_NEGATIVE_REGULATION_OF_CATABOLIC_PROCESS	SET	326	0.092546	0.012266	0.044812	0.019459	0.617752409638554
GOBP_REGULATION_OF_AXONOGENESIS	SET	129	0.15536	0.013023	0.075298	0.019553	0.617752409638554
GOCC_RIBOSOMAL_SUBUNIT	SET	172	0.12203	0.011798	0.059149	0.01956	0.617752409638554
GOCC_NEURON_PROJECTION_TERMINUS	SET	122	0.16863	0.01375	0.081763	0.019592	0.617752409638554
GOCC_CLATHRIN_SCULPTED_VESICLE	SET	12	0.53982	0.013847	0.2618	0.019614	0.617752409638554
GOBP_CANONICAL_WNT_SIGNALING_PATHWAY	SET	296	0.10597	0.013394	0.051394	0.019616	0.617752409638554
GOCC_MITOCHONDRIA_ASSOCIATED_ENDOPLASMIC_RETICULUM_MEMBRANE_CONTACT_SITE	SET	19	0.40639	0.013114	0.19715	0.019645	0.617752409638554
GOCC_MYELIN_SHEATH_ABAXONAL_REGION	SET	6	0.65021	0.011795	0.31586	0.019777	0.620035675675676
GOBP_REGULATION_OF_UBIQUITIN_DEPENDENT_PROTEIN_CATABOLIC_PROCESS	SET	156	0.13802	0.012714	0.067166	0.019952	0.621780530973451
GOCC_RADIAL_SPOKE_HEAD	SET	5	0.62491	0.010349	0.30435	0.020032	0.621780530973451
GOBP_GALACTOSE_TRANSMEMBRANE_TRANSPORT	SET	5	0.91352	0.015128	0.44495	0.02004	0.621780530973451
GOCC_LAMELLIPODIUM_MEMBRANE	SET	22	0.36958	0.012832	0.18014	0.02011	0.621780530973451
GOBP_RESPONSE_TO_HEPARIN	SET	6	0.82744	0.01501	0.40353	0.020164	0.621780530973451
GOBP_REGULATION_OF_BICELLULAR_TIGHT_JUNCTION_ASSEMBLY	SET	22	0.3668	0.012736	0.17893	0.02019	0.621780530973451
GOBP_LYMPHOCYTE_MIGRATION_INTO_LYMPHOID_ORGANS	SET	9	0.6233	0.013847	0.30438	0.020299	0.623298705882353
GOBP_REGULATION_OF_ACTIN_NUCLEATION	SET	37	0.26615	0.011979	0.13016	0.020443	0.62424523255814
GOBP_REGULATION_OF_TRANSLATION	SET	355	0.088227	0.012192	0.043174	0.020508	0.62424523255814
GOMF_PHOSPHATIDYLINOSITOL_4_PHOSPHATE_BINDING	SET	29	0.31919	0.012722	0.15624	0.020536	0.62424523255814
GOBP_PEPTIDYL_THREONINE_MODIFICATION	SET	100	0.17651	0.013038	0.086429	0.020569	0.62424523255814
GOCC_RSC_TYPE_COMPLEX	SET	15	0.44654	0.012805	0.21899	0.020729	0.626128439306358
GOBP_CHAPERONE_MEDIATED_AUTOPHAGY	SET	14	0.38468	0.010657	0.18869	0.020751	0.626128439306358
GOBP_REGULATION_OF_SMALL_MOLECULE_METABOLIC_PROCESS	SET	305	0.097324	0.012484	0.047795	0.020869	0.627874236311239
GOBP_ARP2_3_COMPLEX_MEDIATED_ACTIN_NUCLEATION	SET	43	0.24233	0.011756	0.1193	0.021122	0.633220401146132
GOBP_CELL_MORPHOGENESIS	SET	928	0.059913	0.01317	0.029509	0.021168	0.633220401146132
GOBP_NEGATIVE_REGULATION_OF_G0_TO_G1_TRANSITION	SET	4	0.82684	0.012247	0.40763	0.021268	0.633666477272727
GOCC_PRONUCLEUS	SET	14	0.43244	0.01198	0.21336	0.021347	0.633666477272727
GOBP_REGULATION_OF_LAMELLIPODIUM_ASSEMBLY	SET	35	0.2809	0.012298	0.13862	0.021365	0.633666477272727
GOBP_REGULATION_OF_VESICLE_MEDIATED_TRANSPORT	SET	486	0.07733	0.012458	0.038191	0.021451	0.634414844192635
GOBP_NEURONAL_ACTION_POTENTIAL	SET	34	0.31428	0.013561	0.1556	0.021714	0.639610391061453
GOMF_OXIDOREDUCTASE_ACTIVITY_ACTING_ON_PAIRED_DONORS_WITH_OXIDATION_OF_A_PAIR_OF_DONORS_RESULTING_IN_THE_REDUCTION_OF_MOLECULAR_OXYGEN_TO_TWO_MOLECULES_OF_WATER	SET	10	0.61517	0.014405	0.30479	0.021784	0.639610391061453
GOMF_POLY_ADP_D_RIBOSE_BINDING	SET	5	0.75532	0.012508	0.37446	0.02185	0.639610391061453
GOCC_CYTOSKELETON_OF_PRESYNAPTIC_ACTIVE_ZONE	SET	8	0.7035	0.014735	0.34903	0.021928	0.639610391061453
GOBP_CONVERGENT_EXTENSION	SET	15	0.41812	0.01199	0.20745	0.021933	0.639610391061453
GOCC_CLATHRIN_SCULPTED_MONOAMINE_TRANSPORT_VESICLE	SET	5	0.77743	0.012874	0.38601	0.022012	0.640126128133705
GOCC_RIBOSOME	SET	217	0.10628	0.011527	0.052842	0.022153	0.642437
GOBP_ERYTHROCYTE_MATURATION	SET	20	0.34619	0.011461	0.17237	0.022305	0.643838241758242
GOMF_PHOSPHATASE_REGULATOR_ACTIVITY	SET	99	0.16484	0.012115	0.08209	0.022329	0.643838241758242
GOCC_ASTROCYTE_END_FOOT	SET	11	0.49484	0.012153	0.24666	0.022427	0.643838241758242
GOBP_INTRACELLULAR_PROTEIN_TRANSMEMBRANE_TRANSPORT	SET	30	0.28133	0.011404	0.14026	0.022448	0.643838241758242
GOBP_CELL_DIFFERENTIATION_IN_SPINAL_CORD	SET	49	0.26438	0.01369	0.13192	0.022538	0.643885573770492
GOBP_CDP_CHOLINE_PATHWAY	SET	6	0.59554	0.010803	0.29726	0.022573	0.643885573770492
GOBP_AUDITORY_RECEPTOR_CELL_DEVELOPMENT	SET	26	0.33776	0.012748	0.16877	0.022687	0.645374059945504
GOBP_REGULATION_OF_CELLULAR_KETONE_METABOLIC_PROCESS	SET	127	0.14848	0.012351	0.074289	0.022829	0.645893658536585
GOBP_REGULATION_OF_DNA_BINDING_TRANSCRIPTION_FACTOR_ACTIVITY	SET	327	0.093147	0.012364	0.046604	0.022829	0.645893658536585
GOBP_PROTEIN_LOCALIZATION_TO_MICROTUBULE_ORGANIZING_CENTER	SET	37	0.26217	0.0118	0.13126	0.0229	0.646151351351351
GOBP_POSITIVE_REGULATION_OF_ENDOCYTOSIS	SET	146	0.14392	0.012829	0.072159	0.023057	0.648827708894879
GOCC_PROTEASOME_CORE_COMPLEX_BETA_SUBUNIT_COMPLEX	SET	11	0.53146	0.013052	0.26676	0.023179	0.650507419354839
GOBP_CELLULAR_RESPONSE_TO_ACIDIC_PH	SET	14	0.47013	0.013024	0.23634	0.023348	0.653416276595745
GOBP_TRANSITION_METAL_ION_TRANSPORT	SET	93	0.16813	0.011979	0.084643	0.023504	0.653416276595745
GOBP_CELL_JUNCTION_ORGANIZATION	SET	724	0.06556	0.012804	0.033011	0.023526	0.653416276595745
GOBP_CELLULAR_RESPONSE_TO_TOXIC_SUBSTANCE	SET	129	0.14713	0.012334	0.074088	0.023533	0.653416276595745
GOBP_REGULATION_OF_EXTENT_OF_CELL_GROWTH	SET	87	0.18089	0.012468	0.091213	0.02368	0.655753846153846
GOBP_NEGATIVE_REGULATION_OF_AXON_EXTENSION_INVOLVED_IN_AXON_GUIDANCE	SET	8	0.51868	0.010864	0.26207	0.023905	0.658351894736842
GOCC_TRANS_GOLGI_NETWORK_MEMBRANE	SET	103	0.15393	0.011539	0.077789	0.023924	0.658351894736842
GOBP_POSITIVE_REGULATION_OF_SECRETION	SET	305	0.096155	0.012334	0.048608	0.023963	0.658351894736842
GOBP_POSITIVE_REGULATION_OF_NEURON_PROJECTION_ARBORIZATION	SET	8	0.54752	0.011468	0.277	0.024052	0.658785863874346
GOCC_NEURONAL_DENSE_CORE_VESICLE	SET	25	0.35651	0.013194	0.18045	0.024105	0.658785863874346
GOBP_AXON_DEVELOPMENT	SET	488	0.079595	0.012848	0.040315	0.02418	0.659110182767624
GOBP_NEUTROPHIL_MEDIATED_KILLING_OF_SYMBIONT_CELL	SET	13	0.46477	0.012408	0.2357	0.024319	0.65975
GOBP_CELLULAR_RESPONSE_TO_CADMIUM_ION	SET	34	0.30385	0.013111	0.15425	0.024433	0.65975
GOBP_NEGATIVE_REGULATION_OF_LIPOPROTEIN_LIPASE_ACTIVITY	SET	5	0.7801	0.012919	0.39645	0.024559	0.65975
GOBP_AXON_EXTENSION	SET	96	0.17484	0.012655	0.088915	0.024635	0.65975
GOBP_NEGATIVE_REGULATION_OF_AXONOGENESIS	SET	45	0.2492	0.012367	0.12678	0.024679	0.65975
GOBP_REGULATION_OF_WNT_SIGNALING_PATHWAY	SET	313	0.096383	0.012521	0.049059	0.024736	0.65975
GOCC_PRESYNAPTIC_ACTIVE_ZONE_CYTOPLASMIC_COMPONENT	SET	17	0.45128	0.013776	0.23001	0.02489	0.65975
GOBP_REGULATION_OF_ARP2_3_COMPLEX_MEDIATED_ACTIN_NUCLEATION	SET	28	0.28928	0.011329	0.14745	0.024899	0.65975
GOBP_REGULATION_OF_CATECHOLAMINE_UPTAKE_INVOLVED_IN_SYNAPTIC_TRANSMISSION	SET	8	0.5708	0.011956	0.29109	0.024953	0.65975
GOMF_ACTIVE_MONOATOMIC_ION_TRANSMEMBRANE_TRANSPORTER_ACTIVITY	SET	265	0.099505	0.011911	0.050754	0.024974	0.65975
GOBP_POSITIVE_REGULATION_OF_INTRACELLULAR_TRANSPORT	SET	131	0.1386	0.011707	0.070704	0.024993	0.65975
GOBP_CONVERGENT_EXTENSION_INVOLVED_IN_GASTRULATION	SET	9	0.50429	0.011203	0.25728	0.025	0.65975
GOBP_COENZYME_A_BIOSYNTHETIC_PROCESS	SET	10	0.42207	0.0098834	0.21538	0.025025	0.65975
GOBP_GALACTOSYLCERAMIDE_BIOSYNTHETIC_PROCESS	SET	6	0.53704	0.0097421	0.27441	0.025176	0.661602211055276
GOCC_INNER_MITOCHONDRIAL_MEMBRANE_PROTEIN_COMPLEX	SET	139	0.12439	0.010821	0.063583	0.025222	0.661602211055276
GOBP_CELLULAR_RESPONSE_TO_PARATHYROID_HORMONE_STIMULUS	SET	8	0.5794	0.012136	0.29638	0.025304	0.66208962406015
GOMF_MONOCARBOXYLIC_ACID_TRANSMEMBRANE_TRANSPORTER_ACTIVITY	SET	68	0.20389	0.01243	0.10436	0.025368	0.662105
GOMF_PHOSPHATIDYLSERINE_1_ACYLHYDROLASE_ACTIVITY	SET	11	0.50918	0.012505	0.26129	0.025673	0.665808415841584
GOCC_FEMALE_PRONUCLEUS	SET	10	0.46173	0.010812	0.23699	0.025696	0.665808415841584
GOBP_NEGATIVE_REGULATION_OF_CANONICAL_WNT_SIGNALING_PATHWAY	SET	131	0.14832	0.012529	0.076167	0.025757	0.665808415841584
GOBP_CELLULAR_RESPONSE_TO_OXIDATIVE_STRESS	SET	234	0.10456	0.011771	0.053697	0.025765	0.665808415841584
GOBP_REGULATION_OF_NON_CANONICAL_WNT_SIGNALING_PATHWAY	SET	26	0.33876	0.012785	0.17433	0.026001	0.668109073170732
GOMF_PROTEIN_PHOSPHATASE_2B_BINDING	SET	6	0.72275	0.013111	0.37212	0.02606	0.668109073170732
GOCC_MYELIN_SHEATH_ADAXONAL_REGION	SET	6	0.5221	0.0094711	0.26904	0.02616	0.668109073170732
GOCC_PHAGOCYTIC_CUP	SET	28	0.31957	0.012515	0.16471	0.026187	0.668109073170732
GOBP_SODIUM_ION_TRANSPORT	SET	236	0.11193	0.012653	0.057708	0.026227	0.668109073170732
GOMF_HEXOSE_TRANSMEMBRANE_TRANSPORTER_ACTIVITY	SET	25	0.34953	0.012936	0.18023	0.026238	0.668109073170732
GOBP_NEURON_PROJECTION_EXTENSION_INVOLVED_IN_NEURON_PROJECTION_GUIDANCE	SET	19	0.35028	0.011303	0.18078	0.026346	0.668996213592233
GOBP_ANTEROGRADE_DENDRITIC_TRANSPORT_OF_NEUROTRANSMITTER_RECEPTOR_COMPLEX	SET	4	0.93561	0.013859	0.4831	0.026401	0.668996213592233
GOBP_VASODILATION	SET	48	0.24787	0.012703	0.1282	0.026595	0.67146347826087
GOBP_GLYCOSYLCERAMIDE_BIOSYNTHETIC_PROCESS	SET	8	0.46489	0.0097373	0.2405	0.026627	0.67146347826087
GOBP_NEURON_REMODELING	SET	15	0.4466	0.012807	0.23132	0.026772	0.672380956937799
GOBP_UDP_GLUCOSE_METABOLIC_PROCESS	SET	6	0.5794	0.010511	0.30025	0.026828	0.672380956937799
GOCC_DISTAL_AXON	SET	257	0.10624	0.012526	0.05507	0.026866	0.672380956937799
GOBP_MONOAMINE_TRANSPORT	SET	74	0.19304	0.012275	0.10011	0.026921	0.672380956937799
GOBP_REGULATION_OF_GLYCOGEN_BIOSYNTHETIC_PROCESS	SET	26	0.32839	0.012394	0.17043	0.027013	0.673068544152745
GOMF_SYNTAXIN_BINDING	SET	59	0.20742	0.011782	0.10775	0.027122	0.674037149643705
GOBP_CONVERGENT_EXTENSION_INVOLVED_IN_ORGANOGENESIS	SET	5	0.66219	0.010966	0.34416	0.027181	0.674037149643705
GOBP_DENDRITE_DEVELOPMENT	SET	222	0.11282	0.012376	0.05869	0.027287	0.675062274881517
GOBP_LABYRINTHINE_LAYER_MORPHOGENESIS	SET	22	0.39404	0.013681	0.20547	0.027578	0.675382191780822
GOBP_POSITIVE_REGULATION_OF_REGULATED_SECRETORY_PATHWAY	SET	41	0.23395	0.011083	0.12199	0.027579	0.675382191780822
GOBP_ACTIN_MODIFICATION	SET	5	0.70819	0.011728	0.36933	0.027596	0.675382191780822
GOBP_DENSE_CORE_GRANULE_TRANSPORT	SET	10	0.53045	0.012421	0.27692	0.027719	0.675382191780822
GOBP_REGULATION_OF_NEUTROPHIL_MIGRATION	SET	40	0.2522	0.011802	0.1317	0.027756	0.675382191780822
GOCC_PROTEASOME_COMPLEX	SET	61	0.18505	0.010688	0.096766	0.02792	0.675382191780822
GOBP_NATURAL_KILLER_CELL_DEGRANULATION	SET	11	0.49616	0.012185	0.25952	0.027955	0.675382191780822
GOBP_REGULATION_OF_GLUCOCORTICOID_METABOLIC_PROCESS	SET	11	0.49323	0.012113	0.25807	0.027998	0.675382191780822
GOBP_GLUTATHIONE_METABOLIC_PROCESS	SET	50	0.22456	0.011745	0.11754	0.028043	0.675382191780822
GOMF_LIGAND_ACTIVATED_TRANSCRIPTION_FACTOR_ACTIVITY	SET	52	0.23184	0.012365	0.12145	0.028145	0.675382191780822
GOBP_POSITIVE_REGULATION_OF_GOLGI_TO_PLASMA_MEMBRANE_PROTEIN_TRANSPORT	SET	5	0.67027	0.0111	0.35129	0.028201	0.675382191780822
GOBP_POSITIVE_REGULATION_OF_ENDOPLASMIC_RETICULUM_UNFOLDED_PROTEIN_RESPONSE	SET	13	0.48062	0.012831	0.25192	0.028216	0.675382191780822
GOBP_2_OXOGLUTARATE_METABOLIC_PROCESS	SET	17	0.40484	0.012358	0.21229	0.02827	0.675382191780822
GOBP_EXPORT_FROM_CELL	SET	864	0.056401	0.011985	0.029578	0.02828	0.675382191780822
GOBP_MONOSACCHARIDE_CATABOLIC_PROCESS	SET	47	0.21579	0.010944	0.11319	0.028301	0.675382191780822
GOBP_PROTEIN_DEPHOSPHORYLATION	SET	196	0.11246	0.011599	0.059003	0.028335	0.675382191780822
GOBP_CYTOSOLIC_TRANSPORT	SET	135	0.1279	0.010967	0.067304	0.028701	0.682254
GOBP_ATP_SYNTHESIS_COUPLED_ELECTRON_TRANSPORT	SET	83	0.15766	0.010614	0.082996	0.028754	0.682254
GOBP_POSITIVE_REGULATION_OF_ERAD_PATHWAY	SET	15	0.38618	0.011074	0.20357	0.02892	0.684595945945946
GOMF_MRNA_CDS_BINDING	SET	3	0.97692	0.012532	0.51546	0.029038	0.684595945945946
GOCC_BRUSH_BORDER	SET	103	0.16107	0.012074	0.085014	0.029076	0.684595945945946
GOBP_PREPULSE_INHIBITION	SET	13	0.41824	0.011166	0.22081	0.029115	0.684595945945946
GOBP_POSITIVE_REGULATION_OF_GONAD_DEVELOPMENT	SET	8	0.64888	0.013591	0.34344	0.029431	0.685382527716186
GOBP_DOUBLE_STRAND_BREAK_REPAIR_VIA_SYNTHESIS_DEPENDENT_STRAND_ANNEALING	SET	8	0.4436	0.0092914	0.23484	0.029459	0.685382527716186
GOBP_UBIQUITIN_DEPENDENT_GLYCOPROTEIN_ERAD_PATHWAY	SET	7	0.56799	0.011129	0.3008	0.029502	0.685382527716186
GOMF_MANNOSYL_OLIGOSACCHARIDE_1_2_ALPHA_MANNOSIDASE_ACTIVITY	SET	7	0.56799	0.011129	0.3008	0.029502	0.685382527716186
GOCC_DENSE_CORE_GRANULE_MEMBRANE	SET	7	0.62209	0.012189	0.32945	0.029504	0.685382527716186
GOBP_CELLULAR_RESPONSE_TO_FLUID_SHEAR_STRESS	SET	19	0.39602	0.012779	0.20988	0.0296	0.685382527716186
GOBP_MESODERM_DEVELOPMENT	SET	123	0.14823	0.012136	0.078566	0.029608	0.685382527716186
GOMF_RIBOSOMAL_LARGE_SUBUNIT_BINDING	SET	14	0.35579	0.0098569	0.1887	0.029686	0.68566778761062
GOBP_REGULATION_OF_PROTEIN_BINDING	SET	118	0.14128	0.011331	0.074999	0.029807	0.686942781456954
GOBP_EXOCYTOSIS	SET	334	0.085467	0.011463	0.045505	0.030187	0.693904351648352
GOCC_TRANSFERASE_COMPLEX_TRANSFERRING_PHOSPHORUS_CONTAINING_GROUPS	SET	273	0.0891	0.010822	0.04746	0.030242	0.693904351648352
GOBP_RESPONSE_TO_CORTISOL	SET	6	0.80235	0.014555	0.42821	0.030492	0.697012778993435
GOBP_NEGATIVE_REGULATION_OF_LIPID_CATABOLIC_PROCESS	SET	28	0.29213	0.011441	0.15593	0.030511	0.697012778993435
GOBP_CELLULAR_RESPIRATION	SET	212	0.09964	0.010683	0.053251	0.030671	0.69913807860262
GOCC_PRESYNAPTIC_ACTIVE_ZONE_MEMBRANE	SET	31	0.28108	0.011582	0.15065	0.031046	0.699676
GOBP_REGULATION_OF_NEURON_PROJECTION_DEVELOPMENT	SET	417	0.078828	0.011786	0.042256	0.031065	0.699676
GOBP_CD4_POSITIVE_CD25_POSITIVE_ALPHA_BETA_REGULATORY_T_CELL_DIFFERENTIATION	SET	8	0.60285	0.012627	0.32329	0.031117	0.699676
GOBP_PRESYNAPTIC_ACTIVE_ZONE_ORGANIZATION	SET	7	0.63249	0.012393	0.33919	0.03112	0.699676
GOBP_SUBTELOMERIC_HETEROCHROMATIN_FORMATION	SET	8	0.55563	0.011638	0.29798	0.031124	0.699676
GOBP_ENDOPLASMIC_RETICULUM_TUBULAR_NETWORK_ORGANIZATION	SET	21	0.33997	0.011533	0.18242	0.031189	0.699676
GOMF_METAL_ION_SENSOR_ACTIVITY	SET	8	0.61132	0.012804	0.32815	0.031246	0.699676
GOCC_PRESYNAPTIC_ACTIVE_ZONE	SET	76	0.18173	0.01171	0.097575	0.03128	0.699676
GOBP_REGULATION_OF_HORMONE_BIOSYNTHETIC_PROCESS	SET	24	0.34111	0.01237	0.18341	0.031466	0.699676
GOBP_COGNITION	SET	306	0.092999	0.011948	0.050011	0.031482	0.699676
GOBP_REGULATION_OF_MEMBRANE_POTENTIAL	SET	436	0.079951	0.012217	0.042995	0.031485	0.699676
GOBP_NEGATIVE_REGULATION_OF_NF_KAPPAB_TRANSCRIPTION_FACTOR_ACTIVITY	SET	68	0.18558	0.011314	0.099868	0.031571	0.699676
GOBP_CELL_CELL_JUNCTION_ASSEMBLY	SET	150	0.1318	0.011907	0.070953	0.031621	0.699676
GOBP_NEGATIVE_REGULATION_BY_HOST_OF_VIRAL_TRANSCRIPTION	SET	14	0.3898	0.010799	0.2099	0.031659	0.699676
GOMF_SODIUM_PHOSPHATE_SYMPORTER_ACTIVITY	SET	13	0.46847	0.012507	0.25238	0.031719	0.699676
GOMF_SNARE_BINDING	SET	103	0.14724	0.011037	0.079428	0.031893	0.699676
GOBP_LEUKOTRIENE_D4_BIOSYNTHETIC_PROCESS	SET	6	0.66863	0.012129	0.36085	0.031954	0.699676
GOMF_GLUTATHIONE_HYDROLASE_ACTIVITY	SET	6	0.66863	0.012129	0.36085	0.031954	0.699676
GOBP_PROTEIN_LIPOYLATION	SET	5	0.64518	0.010684	0.34843	0.032043	0.699676
GOCC_MALE_PRONUCLEUS	SET	8	0.53317	0.011168	0.28799	0.032065	0.699676
GOBP_CAMKK_AMPK_SIGNALING_CASCADE	SET	9	0.51448	0.01143	0.27802	0.032125	0.699676
GOBP_MYCOTOXIN_METABOLIC_PROCESS	SET	7	0.59037	0.011567	0.31913	0.032169	0.699676
GOBP_GLUTAMATE_SECRETION_NEUROTRANSMISSION	SET	8	0.58955	0.012348	0.31905	0.032322	0.701481896907217
GOCC_PROTEASOME_ACCESSORY_COMPLEX	SET	23	0.25404	0.0090183	0.13759	0.032433	0.701481896907217
GOBP_AMELOBLAST_DIFFERENTIATION	SET	5	0.83254	0.013787	0.45106	0.032472	0.701481896907217
GOCC_MITOTIC_SPINDLE_MICROTUBULE	SET	13	0.34926	0.0093241	0.18934	0.032554	0.701481896907217
GOBP_MANGANESE_ION_TRANSPORT	SET	11	0.45401	0.01115	0.24619	0.032588	0.701481896907217
GOBP_CEREBRAL_CORTEX_GABAERGIC_INTERNEURON_MIGRATION	SET	4	0.92568	0.013711	0.50305	0.032882	0.70215314516129
GOMF_ACTIVE_TRANSMEMBRANE_TRANSPORTER_ACTIVITY	SET	427	0.07477	0.011309	0.040635	0.032888	0.70215314516129
GOBP_REGULATION_OF_HORMONE_METABOLIC_PROCESS	SET	39	0.26427	0.012211	0.14363	0.032896	0.70215314516129
GOBP_TRANSLATIONAL_TERMINATION	SET	16	0.33829	0.010018	0.1839	0.032926	0.70215314516129
GOBP_LEARNING	SET	149	0.13081	0.011779	0.071139	0.032975	0.70215314516129
GOBP_DOPAMINE_SECRETION	SET	30	0.2994	0.012136	0.16292	0.033065	0.70215314516129
GOBP_KILLING_BY_HOST_OF_SYMBIONT_CELLS	SET	26	0.30279	0.011428	0.16489	0.033159	0.70215314516129
GOBP_ESTABLISHMENT_OR_MAINTENANCE_OF_CELL_POLARITY	SET	221	0.10817	0.011839	0.05893	0.033214	0.70215314516129
GOCC_ZYMOGEN_GRANULE	SET	19	0.36308	0.011716	0.19781	0.033225	0.70215314516129
GOBP_VESICLE_DOCKING	SET	57	0.19808	0.011059	0.10798	0.033312	0.70215314516129
GOCC_PERINUCLEOLAR_COMPARTMENT	SET	5	0.79008	0.013084	0.43087	0.033359	0.70215314516129
GOMF_SEQUENCE_SPECIFIC_MRNA_BINDING	SET	12	0.37876	0.0097152	0.20701	0.033661	0.704689824561403
GOBP_PEPTIDYL_LYSINE_METHYLATION	SET	22	0.30537	0.010603	0.16694	0.033689	0.704689824561403
GOCC_STEREOCILIUM_TIP	SET	20	0.35654	0.011804	0.19527	0.033941	0.704689824561403
GOBP_PROGRAMMED_CELL_DEATH_INVOLVED_IN_CELL_DEVELOPMENT	SET	24	0.3114	0.011292	0.17064	0.03402	0.704689824561403
GOBP_DETECTION_OF_MECHANICAL_STIMULUS_INVOLVED_IN_SENSORY_PERCEPTION_OF_PAIN	SET	15	0.41375	0.011865	0.22673	0.034021	0.704689824561403
GOBP_REGULATION_OF_MITOCHONDRIAL_DEPOLARIZATION	SET	19	0.3622	0.011688	0.19853	0.034058	0.704689824561403
GOBP_NEGATIVE_REGULATION_OF_CELL_GROWTH	SET	159	0.12221	0.011364	0.067002	0.034089	0.704689824561403
GOBP_PRESYNAPTIC_MODULATION_OF_CHEMICAL_SYNAPTIC_TRANSMISSION	SET	34	0.25923	0.011186	0.14213	0.034093	0.704689824561403
GOBP_PROTEIN_TRANSMEMBRANE_IMPORT_INTO_INTRACELLULAR_ORGANELLE	SET	35	0.22967	0.010055	0.12596	0.034137	0.704689824561403
GOBP_REGULATION_OF_ER_TO_GOLGI_VESICLE_MEDIATED_TRANSPORT	SET	10	0.50126	0.011738	0.27522	0.034288	0.704689824561403
GOBP_CHONDROCYTE_DEVELOPMENT_INVOLVED_IN_ENDOCHONDRAL_BONE_MORPHOGENESIS	SET	8	0.63491	0.013298	0.34879	0.034362	0.704689824561403
GOMF_TRANSFERASE_ACTIVITY_TRANSFERRING_ALKYL_OR_ARYL_OTHER_THAN_METHYL_GROUPS	SET	57	0.20208	0.011283	0.11103	0.034387	0.704689824561403
GOBP_RESPONSE_TO_PARATHYROID_HORMONE	SET	10	0.49718	0.011642	0.27328	0.034441	0.704689824561403
GOBP_GOLGI_TO_VACUOLE_TRANSPORT	SET	20	0.31999	0.010594	0.17593	0.034475	0.704689824561403
GOBP_CARDIOLIPIN_METABOLIC_PROCESS	SET	14	0.38994	0.010803	0.21456	0.03459	0.704689824561403
GOBP_MITOCHONDRIAL_GENE_EXPRESSION	SET	165	0.10826	0.010254	0.059571	0.034593	0.704689824561403
GOMF_OXIDOREDUCTASE_ACTIVITY_ACTING_ON_THE_CH_CH_GROUP_OF_DONORS_WITH_A_FLAVIN_AS_ACCEPTOR	SET	13	0.37026	0.0098847	0.20379	0.034627	0.704689824561403
GOBP_MISMATCH_REPAIR	SET	31	0.27511	0.011336	0.15173	0.034908	0.70787254368932
GOBP_CENTRIOLE_ELONGATION	SET	8	0.51119	0.010707	0.28195	0.034919	0.70787254368932
GOMF_INORGANIC_MOLECULAR_ENTITY_TRANSMEMBRANE_TRANSPORTER_ACTIVITY	SET	688	0.059665	0.011371	0.032948	0.035087	0.70989976744186
GOMF_CALCIUM_INDUCED_CALCIUM_RELEASE_ACTIVITY	SET	6	0.62761	0.011385	0.34727	0.035368	0.711530742857143
GOBP_INSULIN_PROCESSING	SET	8	0.57498	0.012043	0.31818	0.035386	0.711530742857143
GOBP_POSITIVE_REGULATION_OF_FATTY_ACID_OXIDATION	SET	13	0.44263	0.011817	0.24523	0.035548	0.711530742857143
GOCC_CYTOSOLIC_REGION	SET	18	0.34929	0.010971	0.19352	0.03555	0.711530742857143
GOMF_RIBONUCLEOPROTEIN_COMPLEX_BINDING	SET	157	0.11171	0.010323	0.061909	0.035588	0.711530742857143
GOBP_AMINO_ACID_BETAINE_BIOSYNTHETIC_PROCESS	SET	5	0.74668	0.012365	0.41392	0.035632	0.711530742857143
GOBP_BEHAVIOR	SET	634	0.063064	0.011555	0.034986	0.035736	0.711530742857143
GOBP_NEGATIVE_REGULATION_OF_PROTEOLYSIS	SET	199	0.11146	0.011582	0.06185	0.035775	0.711530742857143
GOBP_PLANAR_CELL_POLARITY_PATHWAY_INVOLVED_IN_NEURAL_TUBE_CLOSURE	SET	10	0.45687	0.010698	0.25353	0.035781	0.711530742857143
GOCC_PROTEASOME_REGULATORY_PARTICLE_LID_SUBCOMPLEX	SET	7	0.44497	0.0087184	0.24728	0.035983	0.712911347248577
GOBP_RETROGRADE_AXONAL_TRANSPORT	SET	21	0.30814	0.010453	0.17125	0.035987	0.712911347248577
GOBP_REGULATION_OF_CORTISOL_BIOSYNTHETIC_PROCESS	SET	7	0.56869	0.011143	0.31669	0.036277	0.716708960302457
GOCC_CIS_GOLGI_NETWORK	SET	64	0.18389	0.010878	0.10243	0.036316	0.716708960302457
GOCC_SODIUM_CHANNEL_COMPLEX	SET	24	0.35912	0.013023	0.20022	0.036451	0.718015924528302
GOBP_REGULATION_OF_HORMONE_SECRETION	SET	251	0.098676	0.0115	0.055066	0.036577	0.718220977443609
GOBP_POSITIVE_REGULATION_OF_PROTEIN_EXPORT_FROM_NUCLEUS	SET	19	0.35523	0.011463	0.19826	0.036599	0.718220977443609
GOBP_REGULATION_OF_AXON_EXTENSION_INVOLVED_IN_AXON_GUIDANCE	SET	15	0.34708	0.0099527	0.19406	0.036854	0.721513483146067
GOBP_TYPE_I_PNEUMOCYTE_DIFFERENTIATION	SET	8	0.57056	0.011951	0.31912	0.036905	0.721513483146067
GOBP_REGULATION_OF_FEAR_RESPONSE	SET	10	0.56484	0.013227	0.31609	0.036982	0.721667439252336
GOBP_POSTSYNAPTIC_CYTOSKELETON_ORGANIZATION	SET	19	0.34853	0.011247	0.19546	0.037288	0.725311323529412
GOCC_WNT_SIGNALOSOME	SET	13	0.44782	0.011955	0.25118	0.037313	0.725311323529412
GOBP_T_CELL_ACTIVATION_VIA_T_CELL_RECEPTOR_CONTACT_WITH_ANTIGEN_BOUND_TO_MHC_MOLECULE_ON_ANTIGEN_PRESENTING_CELL	SET	10	0.43614	0.010213	0.24483	0.03743	0.725311323529412
GOCC_INTERCELLULAR_CANALICULUS	SET	6	0.71437	0.012959	0.40124	0.037514	0.725311323529412
GOMF_KINASE_ACTIVITY	SET	702	0.056909	0.010951	0.031977	0.037572	0.725311323529412
GOBP_NEGATIVE_REGULATION_OF_LIPID_METABOLIC_PROCESS	SET	98	0.15252	0.011153	0.085777	0.037702	0.725311323529412
GOMF_LYSOPHOSPHATIDIC_ACID_BINDING	SET	7	0.49968	0.0097904	0.28102	0.037704	0.725311323529412
GOCC_PRESYNAPTIC_CYTOSKELETON	SET	11	0.54882	0.013478	0.30873	0.037739	0.725311323529412
GOBP_GLYCOLYTIC_PROCESS_THROUGH_GLUCOSE_6_PHOSPHATE	SET	19	0.34754	0.011215	0.19558	0.037794	0.725311323529412
GOBP_REGULATION_OF_NUCLEOTIDE_EXCISION_REPAIR	SET	28	0.27762	0.010873	0.15639	0.037941	0.726796403669725
GOBP_REGULATION_OF_DNA_LIGATION	SET	6	0.54802	0.0099412	0.30926	0.038202	0.730455824175824
GOMF_NUCLEAR_IMPORT_SIGNAL_RECEPTOR_ACTIVITY	SET	20	0.32271	0.010684	0.18227	0.03833	0.731262229007634
GOBP_CHEMOSENSORY_BEHAVIOR	SET	19	0.3493	0.011272	0.19739	0.038409	0.731262229007634
GOBP_FOREBRAIN_CELL_MIGRATION	SET	60	0.206	0.0118	0.11663	0.038684	0.731262229007634
GOBP_CEREBRAL_CORTEX_GABAERGIC_INTERNEURON_DEVELOPMENT	SET	5	0.74099	0.012271	0.4198	0.038782	0.731262229007634
GOBP_SYMPATHETIC_NERVOUS_SYSTEM_DEVELOPMENT	SET	22	0.33627	0.011676	0.19056	0.03882	0.731262229007634
GOBP_DNA_DOUBLE_STRAND_BREAK_PROCESSING	SET	20	0.36662	0.012138	0.20778	0.038834	0.731262229007634
GOBP_CARBOHYDRATE_IMPORT_ACROSS_PLASMA_MEMBRANE	SET	6	0.68086	0.012351	0.38605	0.038904	0.731262229007634
GOBP_REGULATION_OF_RETROGRADE_TRANSPORT_ENDOSOME_TO_GOLGI	SET	7	0.62099	0.012167	0.35224	0.03896	0.731262229007634
GOBP_POSITIVE_REGULATION_OF_PROTEIN_EXIT_FROM_ENDOPLASMIC_RETICULUM	SET	12	0.39739	0.010193	0.22566	0.039127	0.731262229007634
GOMF_MONOATOMIC_ANION_CHANNEL_ACTIVITY	SET	89	0.16693	0.011636	0.094837	0.039194	0.731262229007634
GOCC_AXON	SET	624	0.062546	0.011373	0.035536	0.039207	0.731262229007634
GOBP_POSITIVE_REGULATION_OF_GASTRULATION	SET	6	0.69729	0.012649	0.39648	0.039323	0.731262229007634
GOBP_LIPOPROTEIN_LOCALIZATION	SET	20	0.32162	0.010648	0.18288	0.039328	0.731262229007634
GOBP_POSITIVE_REGULATION_OF_DNA_LIGATION	SET	5	0.64574	0.010694	0.36751	0.039462	0.731262229007634
GOBP_GOLGI_ORGANIZATION	SET	146	0.11769	0.010491	0.067106	0.039737	0.731262229007634
GOMF_ORGANIC_HYDROXY_COMPOUND_TRANSMEMBRANE_TRANSPORTER_ACTIVITY	SET	52	0.22003	0.011735	0.12549	0.039785	0.731262229007634
GOBP_NEGATIVE_REGULATION_OF_HORMONE_METABOLIC_PROCESS	SET	12	0.43754	0.011223	0.24965	0.039844	0.731262229007634
GOBP_ENDOPLASMIC_RETICULUM_TO_GOLGI_VESICLE_MEDIATED_TRANSPORT	SET	127	0.12052	0.010025	0.068784	0.039888	0.731262229007634
GOBP_REGULATION_OF_RNA_EXPORT_FROM_NUCLEUS	SET	14	0.31615	0.0087586	0.18058	0.040002	0.731262229007634
GOMF_MANGANESE_ION_TRANSMEMBRANE_TRANSPORTER_ACTIVITY	SET	9	0.46141	0.010251	0.26375	0.040116	0.731262229007634
GOBP_REGULATION_OF_PRESYNAPTIC_MEMBRANE_POTENTIAL	SET	28	0.30835	0.012076	0.17635	0.040195	0.731262229007634
GOBP_HEART_VALVE_MORPHOGENESIS	SET	61	0.20747	0.011982	0.11869	0.040241	0.731262229007634
GOBP_UTERUS_DEVELOPMENT	SET	25	0.31113	0.011515	0.178	0.04025	0.731262229007634
GOBP_REGULATION_OF_T_CELL_ACTIVATION_VIA_T_CELL_RECEPTOR_CONTACT_WITH_ANTIGEN_BOUND_TO_MHC_MOLECULE_ON_ANTIGEN_PRESENTING_CELL	SET	6	0.50118	0.0090916	0.28686	0.040318	0.731262229007634
GOBP_REGULATION_OF_POLYSACCHARIDE_BIOSYNTHETIC_PROCESS	SET	34	0.25951	0.011198	0.14872	0.04051	0.731262229007634
GOBP_NEGATIVE_REGULATION_OF_CELL_VOLUME	SET	5	0.71803	0.011891	0.41211	0.040735	0.731262229007634
GOBP_HINDGUT_DEVELOPMENT	SET	8	0.61737	0.012931	0.35456	0.040831	0.731262229007634
GOMF_TAU_PROTEIN_BINDING	SET	42	0.22447	0.010763	0.12892	0.040836	0.731262229007634
GOBP_RESPONSE_TO_CALCIUM_ION	SET	127	0.13412	0.011157	0.077054	0.040881	0.731262229007634
GOBP_REGULATION_OF_CELLULAR_RESPONSE_TO_STRESS	SET	493	0.06352	0.010304	0.03656	0.041164	0.731262229007634
GOBP_RNA_CAPPING	SET	15	0.34602	0.0099222	0.19916	0.041165	0.731262229007634
GOBP_REGULATION_OF_XENOPHAGY	SET	9	0.47724	0.010602	0.27481	0.041233	0.731262229007634
GOCC_POSTSYNAPTIC_RECYCLING_ENDOSOME	SET	7	0.66798	0.013088	0.38494	0.041354	0.731262229007634
GOBP_RESPONSE_TO_SODIUM_PHOSPHATE	SET	9	0.53545	0.011895	0.3086	0.041371	0.731262229007634
GOBP_SYNAPTIC_TRANSMISSION_GABAERGIC	SET	58	0.19512	0.010989	0.11249	0.041415	0.731262229007634
GOMF_POTASSIUM_ION_BINDING	SET	13	0.45372	0.012113	0.26173	0.04151	0.731262229007634
GOBP_INTRINSIC_APOPTOTIC_SIGNALING_PATHWAY	SET	296	0.082334	0.010407	0.047528	0.041616	0.731262229007634
GOBP_REGULATION_OF_CHAPERONE_MEDIATED_AUTOPHAGY	SET	8	0.37771	0.0079113	0.21825	0.041772	0.731262229007634
GOCC_CELL_PROJECTION_MEMBRANE	SET	343	0.076675	0.010419	0.044308	0.041779	0.731262229007634
GOBP_REGULATION_OF_COLLATERAL_SPROUTING	SET	19	0.34674	0.011189	0.2004	0.041801	0.731262229007634
GOBP_PHOSPHATE_ION_HOMEOSTASIS	SET	20	0.36524	0.012092	0.21115	0.041844	0.731262229007634
GOBP_RESPONSE_TO_ACIDIC_PH	SET	26	0.2798	0.01056	0.16176	0.04185	0.731262229007634
GOBP_REGULATION_OF_PROTEIN_SECRETION	SET	252	0.092767	0.010832	0.053643	0.041884	0.731262229007634
GOBP_POSITIVE_REGULATION_OF_PROTEIN_LOCALIZATION_TO_EARLY_ENDOSOME	SET	8	0.542	0.011352	0.31348	0.041917	0.731262229007634
GOBP_RIBOSOMAL_SMALL_SUBUNIT_BIOGENESIS	SET	99	0.1385	0.01018	0.080176	0.042051	0.731262229007634
GOBP_REGULATION_OF_AXON_EXTENSION	SET	71	0.17064	0.010629	0.09881	0.042101	0.731262229007634
GOBP_REGULATION_OF_CELL_SIZE	SET	163	0.11435	0.010765	0.066237	0.042145	0.731262229007634
GOBP_ACYLGLYCEROL_HOMEOSTASIS	SET	39	0.22224	0.010269	0.12886	0.042302	0.731262229007634
GOBP_ENDOPLASMIC_RETICULUM_UNFOLDED_PROTEIN_RESPONSE	SET	73	0.16901	0.010674	0.098006	0.042319	0.731262229007634
GOBP_GLUTATHIONE_CATABOLIC_PROCESS	SET	8	0.5029	0.010534	0.29191	0.042473	0.731262229007634
GOBP_ACTIN_NUCLEATION	SET	55	0.18468	0.01013	0.1072	0.042475	0.731262229007634
GOBP_CENTRAL_NERVOUS_SYSTEM_MATURATION	SET	6	0.48731	0.00884	0.28314	0.042626	0.731262229007634
GOBP_DENDRITIC_SPINE_MAINTENANCE	SET	21	0.35275	0.011967	0.20497	0.042637	0.731262229007634
GOBP_ERAD_PATHWAY	SET	109	0.13005	0.010027	0.075572	0.042648	0.731262229007634
GOCC_FLEMMING_BODY	SET	35	0.24295	0.010636	0.14121	0.042681	0.731262229007634
GOBP_TRUNK_SEGMENTATION	SET	5	0.6247	0.010345	0.3632	0.042726	0.731262229007634
GOBP_SODIUM_DEPENDENT_PHOSPHATE_TRANSPORT	SET	12	0.42432	0.010884	0.24675	0.042759	0.731262229007634
GOMF_CYSTEINE_TYPE_ENDOPEPTIDASE_INHIBITOR_ACTIVITY	SET	35	0.26694	0.011686	0.15547	0.042993	0.731262229007634
GOBP_POSITIVE_REGULATION_OF_PROTEIN_LOCALIZATION_TO_PLASMA_MEMBRANE	SET	59	0.17653	0.010027	0.10288	0.043103	0.731262229007634
GOBP_VESICLE_TARGETING	SET	64	0.16494	0.0097562	0.096188	0.043207	0.731262229007634
GOMF_ISOCITRATE_DEHYDROGENASE_NAD_P_PLUS_ACTIVITY	SET	4	0.77189	0.011434	0.45033	0.043266	0.731262229007634
GOBP_RESPONSE_TO_VASOPRESSIN	SET	8	0.47841	0.01002	0.27912	0.043278	0.731262229007634
GOBP_REGULATION_OF_LEUKOCYTE_ADHESION_TO_VASCULAR_ENDOTHELIAL_CELL	SET	30	0.27147	0.011004	0.15844	0.043323	0.731262229007634
GOBP_GLIAL_CELL_PROLIFERATION	SET	53	0.20358	0.010962	0.11885	0.043372	0.731262229007634
GOMF_NUCLEAR_EXPORT_SIGNAL_RECEPTOR_ACTIVITY	SET	12	0.42258	0.010839	0.24679	0.043431	0.731262229007634
GOBP_SOMATIC_MOTOR_NEURON_DIFFERENTIATION	SET	5	0.66839	0.011069	0.39067	0.043562	0.731262229007634
GOCC_INNER_KINETOCHORE	SET	18	0.36708	0.01153	0.21459	0.043587	0.731262229007634
GOBP_VISUAL_BEHAVIOR	SET	56	0.19452	0.010765	0.11377	0.043663	0.731262229007634
GOMF_ACIDIC_AMINO_ACID_TRANSMEMBRANE_TRANSPORTER_ACTIVITY	SET	18	0.35804	0.011246	0.20949	0.043724	0.731262229007634
GOCC_PROXIMAL_DENDRITE	SET	6	0.60137	0.010909	0.35195	0.043764	0.731262229007634
GOBP_CONSTITUTIVE_HETEROCHROMATIN_FORMATION	SET	10	0.46449	0.010877	0.27202	0.043867	0.731262229007634
GOBP_DETERMINATION_OF_ADULT_LIFESPAN	SET	34	0.25672	0.011077	0.15048	0.044009	0.731262229007634
GOBP_NEGATIVE_REGULATION_OF_DNA_BINDING_TRANSCRIPTION_FACTOR_ACTIVITY	SET	127	0.12846	0.010686	0.075341	0.044097	0.731262229007634
GOBP_L_GLUTAMATE_TRANSMEMBRANE_TRANSPORT	SET	29	0.28391	0.011316	0.16656	0.044144	0.731262229007634
GOBP_CELLULAR_RESPONSE_TO_MINERALOCORTICOID_STIMULUS	SET	12	0.45268	0.011611	0.26563	0.044185	0.731262229007634
GOBP_PROTON_TRANSMEMBRANE_TRANSPORT	SET	142	0.11428	0.010048	0.067068	0.044202	0.731262229007634
GOBP_NEGATIVE_REGULATION_OF_ORGANIC_ACID_TRANSPORT	SET	22	0.30792	0.010691	0.18074	0.044229	0.731262229007634
GOBP_HINDBRAIN_MATURATION	SET	5	0.50346	0.0083374	0.29552	0.044236	0.731262229007634
GOBP_CHONDROCYTE_HYPERTROPHY	SET	6	0.69347	0.01258	0.40721	0.044297	0.731262229007634
GOBP_REGULATION_OF_NEUTROPHIL_CHEMOTAXIS	SET	31	0.26501	0.01092	0.15573	0.044418	0.731262229007634
GOBP_POSITIVE_REGULATION_OF_LAMELLIPODIUM_ORGANIZATION	SET	34	0.23913	0.010318	0.1406	0.044498	0.731262229007634
GOCC_EARLY_ENDOSOME_LUMEN	SET	5	0.57135	0.0094617	0.3361	0.044581	0.731262229007634
GOMF_INOSITOL_BISPHOSPHATE_PHOSPHATASE_ACTIVITY	SET	7	0.54602	0.010698	0.32129	0.044627	0.731262229007634
GOBP_NADH_METABOLIC_PROCESS	SET	32	0.23875	0.0099948	0.1405	0.044647	0.731262229007634
GOBP_SECRETION	SET	931	0.048201	0.010612	0.028375	0.044697	0.731262229007634
GOCC_MICROTUBULE_BUNDLE	SET	6	0.52548	0.0095324	0.30939	0.044724	0.731262229007634
GOBP_NUCLEAR_TRANSPORT	SET	317	0.07564	0.0098881	0.044541	0.044745	0.731262229007634
GOMF_MDM2_MDM4_FAMILY_PROTEIN_BINDING	SET	11	0.44674	0.010971	0.26326	0.044859	0.731262229007634
GOBP_POSITIVE_REGULATION_OF_GRANULOCYTE_CHEMOTAXIS	SET	26	0.26934	0.010165	0.15877	0.044909	0.731262229007634
GOBP_MAINTENANCE_OF_PROTEIN_LOCATION_IN_NUCLEUS	SET	24	0.26221	0.0095083	0.15458	0.044929	0.731262229007634
GOBP_NEGATIVE_REGULATION_OF_PROTEOLYSIS_INVOLVED_IN_PROTEIN_CATABOLIC_PROCESS	SET	61	0.18284	0.01056	0.10784	0.044997	0.731262229007634
GOBP_ACUTE_PHASE_RESPONSE	SET	46	0.23381	0.011731	0.13795	0.04505	0.731262229007634
GOBP_NEGATIVE_REGULATION_OF_UBIQUITIN_DEPENDENT_PROTEIN_CATABOLIC_PROCESS	SET	48	0.20658	0.010587	0.1219	0.045074	0.731262229007634
GOMF_THREONINE_TYPE_ENDOPEPTIDASE_ACTIVITY	SET	9	0.5268	0.011703	0.31091	0.045105	0.731262229007634
GOBP_GASTRO_INTESTINAL_SYSTEM_SMOOTH_MUSCLE_CONTRACTION	SET	12	0.43563	0.011174	0.25718	0.045152	0.731262229007634
GOBP_INSULIN_RECEPTOR_SIGNALING_PATHWAY	SET	123	0.12607	0.010322	0.074458	0.045217	0.731262229007634
GOBP_POSITIVE_REGULATION_OF_MITOPHAGY_IN_RESPONSE_TO_MITOCHONDRIAL_DEPOLARIZATION	SET	8	0.53341	0.011173	0.31505	0.045229	0.731262229007634
GOCC_PRERIBOSOME_SMALL_SUBUNIT_PRECURSOR	SET	15	0.35524	0.010187	0.20998	0.045358	0.731262229007634
GOBP_POSITIVE_REGULATION_OF_HEPATOCYTE_PROLIFERATION	SET	10	0.38558	0.0090289	0.22798	0.045399	0.731262229007634
GOMF_PEPTIDE_ANTIGEN_BINDING	SET	34	0.2645	0.011413	0.15641	0.045427	0.731262229007634
GOMF_PHOSPHATASE_INHIBITOR_ACTIVITY	SET	44	0.20355	0.0099887	0.12047	0.045553	0.731262229007634
GOBP_REGULATION_OF_CELL_PROJECTION_ORGANIZATION	SET	643	0.057214	0.010555	0.033871	0.045604	0.731262229007634
GOCC_HEMIDESMOSOME	SET	8	0.5313	0.011128	0.31458	0.045625	0.731262229007634
GOBP_NEGATIVE_REGULATION_OF_CELLULAR_RESPONSE_TO_TRANSFORMING_GROWTH_FACTOR_BETA_STIMULUS	SET	4	0.60319	0.0089347	0.35715	0.04563	0.731262229007634
GOBP_RESPONSE_TO_ISOQUINOLINE_ALKALOID	SET	13	0.44036	0.011756	0.26083	0.045685	0.731262229007634
GOBP_POSITIVE_REGULATION_OF_HORMONE_SECRETION	SET	140	0.11973	0.010453	0.070977	0.045824	0.731262229007634
GOBP_NUCLEUS_ORGANIZATION	SET	142	0.11025	0.0096928	0.065359	0.045832	0.731262229007634
GOCC_POSTSYNAPTIC_ENDOSOME	SET	13	0.42532	0.011355	0.25219	0.045858	0.731262229007634
GOBP_RRNA_PSEUDOURIDINE_SYNTHESIS	SET	7	0.5458	0.010694	0.32367	0.045879	0.731262229007634
GOBP_INSULIN_SECRETION_INVOLVED_IN_CELLULAR_RESPONSE_TO_GLUCOSE_STIMULUS	SET	62	0.1704	0.0099213	0.1011	0.045962	0.731468414634146
GOMF_TRANSFERASE_ACTIVITY_TRANSFERRING_PHOSPHORUS_CONTAINING_GROUPS	SET	860	0.048036	0.010185	0.028525	0.046104	0.732529422492401
GOBP_POSITIVE_REGULATION_OF_UBIQUITIN_DEPENDENT_PROTEIN_CATABOLIC_PROCESS	SET	98	0.14063	0.010284	0.083547	0.046169	0.732529422492401
GOBP_REGULATION_OF_STEROID_BIOSYNTHETIC_PROCESS	SET	72	0.16896	0.010599	0.10044	0.046263	0.732907010622155
GOCC_SWI_SNF_COMPLEX	SET	30	0.2507	0.010163	0.14921	0.046472	0.735041739130435
GOMF_UBIQUITIN_LIGASE_INHIBITOR_ACTIVITY	SET	9	0.48848	0.010852	0.29091	0.046568	0.735041739130435
GOMF_CDP_ALCOHOL_PHOSPHATIDYLTRANSFERASE_ACTIVITY	SET	8	0.47448	0.0099382	0.28279	0.046697	0.735041739130435
GOBP_GTP_METABOLIC_PROCESS	SET	23	0.27756	0.0098535	0.16556	0.046827	0.735041739130435
GOBP_CELLULAR_MODIFIED_AMINO_ACID_METABOLIC_PROCESS	SET	181	0.10333	0.010245	0.061652	0.046879	0.735041739130435
GOMF_PHOSPHATIDYLINOSITOL_BISPHOSPHATE_BINDING	SET	103	0.14017	0.010507	0.083651	0.046914	0.735041739130435
GOBP_MITOTIC_NUCLEAR_MEMBRANE_DISASSEMBLY	SET	8	0.53896	0.011289	0.32166	0.04692	0.735041739130435
GOMF_POTASSIUM_ION_TRANSMEMBRANE_TRANSPORTER_ACTIVITY	SET	156	0.12072	0.01112	0.072065	0.046961	0.735041739130435
GOMF_METAL_CATION_PROTON_ANTIPORTER_ACTIVITY	SET	23	0.29905	0.010616	0.17878	0.047203	0.737723532934132
GOBP_REGULATION_OF_BRANCHING_INVOLVED_IN_PROSTATE_GLAND_MORPHOGENESIS	SET	5	0.74502	0.012338	0.44578	0.047345	0.738154746268657
GOBP_POSITIVE_REGULATION_OF_FEAR_RESPONSE	SET	7	0.61442	0.012038	0.3677	0.047372	0.738154746268657
GOCC_RADIAL_SPOKE	SET	15	0.30304	0.0086898	0.18161	0.047601	0.738391488250653
GOMF_SECONDARY_ACTIVE_TRANSMEMBRANE_TRANSPORTER_ACTIVITY	SET	276	0.085994	0.010502	0.051576	0.047734	0.738391488250653
GOMF_NEUROTRANSMITTER_RECEPTOR_REGULATOR_ACTIVITY	SET	13	0.39502	0.010546	0.23699	0.047788	0.738391488250653
GOMF_N_ACYLTRANSFERASE_ACTIVITY	SET	87	0.14348	0.0098888	0.08615	0.047923	0.738391488250653
GOBP_DOUBLE_STRAND_BREAK_REPAIR_VIA_ALTERNATIVE_NONHOMOLOGOUS_END_JOINING	SET	8	0.41418	0.0086752	0.2488	0.047995	0.738391488250653
GOBP_PROTEIN_LOCALIZATION_TO_MICROTUBULE	SET	17	0.27236	0.0083138	0.16369	0.048079	0.738391488250653
GOBP_AUTONOMIC_NERVOUS_SYSTEM_DEVELOPMENT	SET	45	0.22438	0.011135	0.13498	0.04824	0.738391488250653
GOMF_COPPER_ION_BINDING	SET	57	0.18874	0.010538	0.11355	0.048242	0.738391488250653
GOBP_REGULATION_OF_VITAMIN_D_BIOSYNTHETIC_PROCESS	SET	7	0.51449	0.010081	0.30968	0.048329	0.738391488250653
GOBP_COLLATERAL_SPROUTING_IN_ABSENCE_OF_INJURY	SET	5	0.54147	0.008967	0.32595	0.048345	0.738391488250653
GOBP_POTASSIUM_ION_TRANSPORT	SET	228	0.099418	0.011049	0.059966	0.048678	0.738391488250653
GOBP_TELOMERIC_D_LOOP_DISASSEMBLY	SET	7	0.48913	0.0095837	0.29507	0.048701	0.738391488250653
GOBP_REGULATION_OF_MITOCHONDRIAL_DNA_METABOLIC_PROCESS	SET	6	0.41609	0.007548	0.25104	0.04872	0.738391488250653
GOBP_NEGATIVE_REGULATION_OF_AMINE_TRANSPORT	SET	27	0.28083	0.010801	0.16951	0.048793	0.738391488250653
GOBP_UTERUS_MORPHOGENESIS	SET	6	0.56362	0.010224	0.34027	0.048833	0.738391488250653
GOBP_REGULATION_OF_COPII_VESICLE_COATING	SET	5	0.44987	0.00745	0.27162	0.048841	0.738391488250653
GOBP_RIBOSOMAL_LARGE_SUBUNIT_EXPORT_FROM_NUCLEUS	SET	7	0.51062	0.010005	0.30838	0.04889	0.738391488250653
GOBP_NEGATIVE_REGULATION_OF_PROTEIN_CATABOLIC_PROCESS	SET	106	0.13052	0.0099243	0.078853	0.048949	0.738391488250653
GOBP_VACUOLAR_PROTON_TRANSPORTING_V_TYPE_ATPASE_COMPLEX_ASSEMBLY	SET	5	0.54045	0.00895	0.3266	0.048995	0.738391488250653
GOBP_LIPID_DROPLET_FORMATION	SET	13	0.34909	0.0093196	0.21126	0.049234	0.738391488250653
GOBP_PROTEIN_LOCALIZATION_TO_ENDOPLASMIC_RETICULUM_EXIT_SITE	SET	6	0.53884	0.0097748	0.3262	0.049291	0.738391488250653
GOCC_POLAR_MICROTUBULE	SET	5	0.54644	0.0090492	0.33107	0.049425	0.738391488250653
GOBP_FATTY_ACID_ELONGATION	SET	13	0.39482	0.01054	0.23931	0.049502	0.738391488250653
GOBP_REGULATION_OF_PROTEIN_LOCALIZATION_TO_ENDOSOME	SET	12	0.42791	0.010976	0.25944	0.049546	0.738391488250653
GOBP_POSITIVE_REGULATION_OF_LOW_DENSITY_LIPOPROTEIN_RECEPTOR_ACTIVITY	SET	5	0.60834	0.010074	0.36884	0.049551	0.738391488250653
GOBP_RESPONSE_TO_OXYGEN_RADICAL	SET	26	0.24708	0.0093253	0.14983	0.049572	0.738391488250653
GOMF_CHLORIDE_CHANNEL_ACTIVITY	SET	73	0.17197	0.010861	0.10429	0.049599	0.738391488250653
GOBP_LAYER_FORMATION_IN_CEREBRAL_CORTEX	SET	14	0.40646	0.01126	0.24683	0.04982	0.738391488250653
GOBP_MYD88_DEPENDENT_TOLL_LIKE_RECEPTOR_SIGNALING_PATHWAY	SET	18	0.30596	0.0096101	0.18596	0.049966	0.738391488250653
GOBP_VESICLE_COATING	SET	37	0.19968	0.0089873	0.12141	0.050034	0.738391488250653
GOBP_PHOSPHATE_ION_TRANSPORT	SET	27	0.27663	0.010639	0.16822	0.050051	0.738391488250653
GOBP_SYNAPSE_ORGANIZATION	SET	459	0.06783	0.010627	0.04125	0.050061	0.738391488250653
GOBP_NEGATIVE_REGULATION_OF_RNA_CATABOLIC_PROCESS	SET	81	0.14986	0.0099677	0.091191	0.050167	0.738391488250653
GOBP_POSITIVE_REGULATION_OF_DENDRITIC_SPINE_DEVELOPMENT	SET	36	0.24178	0.010735	0.14722	0.050277	0.738391488250653
GOBP_PEROXISOMAL_TRANSPORT	SET	20	0.26099	0.0086404	0.15893	0.050284	0.738391488250653
GOBP_RESPONSE_TO_METHIONINE	SET	6	0.5815	0.010549	0.3542	0.050331	0.738391488250653
GOMF_PHOSPHATIDYLCHOLINE_TRANSFER_ACTIVITY	SET	5	0.63178	0.010462	0.38557	0.050662	0.738391488250653
GOBP_OXIDATIVE_PHOSPHORYLATION	SET	123	0.10903	0.0089263	0.066591	0.050792	0.738391488250653
GOBP_POSITIVE_REGULATION_OF_MEMBRANE_DEPOLARIZATION	SET	11	0.46019	0.011302	0.28107	0.050797	0.738391488250653
GOBP_PLASMA_MEMBRANE_TO_ENDOSOME_TRANSPORT	SET	8	0.45265	0.009481	0.27649	0.05081	0.738391488250653
GOBP_REGULATION_OF_BLOOD_BRAIN_BARRIER_PERMEABILITY	SET	9	0.51838	0.011516	0.31668	0.050836	0.738391488250653
GOBP_POSITIVE_REGULATION_OF_LAMELLIPODIUM_ASSEMBLY	SET	26	0.25479	0.0096163	0.15582	0.051016	0.738391488250653
GOBP_ORGANIC_HYDROXY_COMPOUND_TRANSPORT	SET	260	0.087347	0.010358	0.053431	0.051057	0.738391488250653
GOBP_RIBOSOME_ASSEMBLY	SET	55	0.16909	0.0092745	0.10346	0.051107	0.738391488250653
GOBP_REGULATION_OF_PROTEOLYSIS_INVOLVED_IN_PROTEIN_CATABOLIC_PROCESS	SET	209	0.091831	0.0097769	0.05621	0.051169	0.738391488250653
GOBP_DEVELOPMENTAL_CELL_GROWTH	SET	204	0.10086	0.01061	0.061739	0.051177	0.738391488250653
GOBP_POSITIVE_REGULATION_OF_NEUROTRANSMITTER_SECRETION	SET	18	0.30154	0.0094712	0.18475	0.051331	0.738391488250653
GOBP_REGULATION_OF_MICROTUBULE_BINDING	SET	7	0.44508	0.0087205	0.27271	0.051345	0.738391488250653
GOCC_SPECIFIC_GRANULE_LUMEN	SET	60	0.17496	0.010022	0.10723	0.051384	0.738391488250653
GOCC_NUCLEAR_PORE	SET	90	0.1365	0.0095679	0.083726	0.051528	0.738391488250653
GOBP_POSITIVE_REGULATION_OF_PROTEIN_SECRETION	SET	142	0.11267	0.0099063	0.069153	0.05163	0.738391488250653
GOBP_VESICLE_MEDIATED_TRANSPORT_TO_THE_PLASMA_MEMBRANE	SET	150	0.10994	0.0099323	0.067483	0.051648	0.738391488250653
GOMF_PROTON_TRANSPORTING_ATP_SYNTHASE_ACTIVITY_ROTATIONAL_MECHANISM	SET	15	0.2654	0.0076105	0.16298	0.051722	0.738391488250653
GOBP_NUCLEOSIDE_BISPHOSPHATE_BIOSYNTHETIC_PROCESS	SET	53	0.17841	0.0096066	0.1097	0.051951	0.738391488250653
GOBP_NEGATIVE_REGULATION_OF_ORGAN_GROWTH	SET	28	0.28547	0.01118	0.17566	0.05207	0.738391488250653
GOBP_PROTEIN_QUALITY_CONTROL_FOR_MISFOLDED_OR_INCOMPLETELY_SYNTHESIZED_PROTEINS	SET	23	0.27651	0.0098162	0.17019	0.05212	0.738391488250653
GOBP_POSITIVE_REGULATION_OF_HIGH_DENSITY_LIPOPROTEIN_PARTICLE_CLEARANCE	SET	3	0.87529	0.011228	0.53879	0.052139	0.738391488250653
GOBP_POSITIVE_REGULATION_OF_GENE_EXPRESSION	SET	1110	0.042034	0.010052	0.025877	0.052158	0.738391488250653
GOBP_REGULATION_OF_PROTEASOMAL_PROTEIN_CATABOLIC_PROCESS	SET	175	0.098465	0.0096017	0.060646	0.05224	0.738391488250653
GOMF_3_HYDROXYACYL_COA_DEHYDRATASE_ACTIVITY	SET	7	0.52071	0.010202	0.32081	0.052294	0.738391488250653
GOBP_CGAS_STING_SIGNALING_PATHWAY	SET	17	0.29631	0.0090449	0.18257	0.05231	0.738391488250653
GOMF_CYTOKINE_ACTIVITY	SET	230	0.10067	0.011237	0.062042	0.052349	0.738391488250653
GOBP_GLUCOSE_IMPORT_ACROSS_PLASMA_MEMBRANE	SET	5	0.68827	0.011398	0.42426	0.052379	0.738391488250653
GOCC_DNA_POLYMERASE_COMPLEX	SET	18	0.28685	0.0090099	0.17685	0.052411	0.738391488250653
GOCC_LARGE_RIBOSOMAL_SUBUNIT	SET	107	0.11847	0.0090506	0.073074	0.052488	0.738391488250653
GOBP_RESPONSE_TO_ALDOSTERONE	SET	17	0.34943	0.010667	0.21555	0.052501	0.738391488250653
GOBP_L_AMINO_ACID_TRANSPORT	SET	89	0.14866	0.010363	0.091707	0.052511	0.738391488250653
GOBP_REGULATION_OF_NADP_METABOLIC_PROCESS	SET	8	0.4446	0.0093123	0.27429	0.052527	0.738391488250653
GOBP_BIOLOGICAL_PROCESS_INVOLVED_IN_INTERACTION_WITH_SYMBIONT	SET	112	0.12359	0.0096582	0.07625	0.052534	0.738391488250653
GOBP_IRES_DEPENDENT_VIRAL_TRANSLATIONAL_INITIATION	SET	10	0.40046	0.0093775	0.24714	0.05258	0.738391488250653
GOBP_PROLACTIN_SECRETION	SET	5	0.67353	0.011154	0.41569	0.052599	0.738391488250653
GOBP_REGULATION_OF_GLUCOCORTICOID_BIOSYNTHETIC_PROCESS	SET	9	0.46779	0.010392	0.28914	0.052856	0.738391488250653
GOCC_CILIARY_ROOTLET	SET	13	0.3982	0.010631	0.2463	0.052979	0.738391488250653
GOBP_PROTEIN_REFOLDING	SET	26	0.24561	0.0092696	0.15194	0.053001	0.738391488250653
GOMF_VOLTAGE_GATED_MONOATOMIC_ION_CHANNEL_ACTIVITY_INVOLVED_IN_REGULATION_OF_PRESYNAPTIC_MEMBRANE_POTENTIAL	SET	11	0.45567	0.011191	0.28191	0.053018	0.738391488250653
GOBP_GROWTH_PLATE_CARTILAGE_CHONDROCYTE_DEVELOPMENT	SET	5	0.7181	0.011892	0.44428	0.05302	0.738391488250653
GOCC_PROTEASOME_CORE_COMPLEX	SET	20	0.33718	0.011163	0.20872	0.053114	0.738391488250653
GOMF_HORMONE_BINDING	SET	90	0.14889	0.010437	0.092176	0.05313	0.738391488250653
GOMF_TRANSITION_METAL_ION_TRANSMEMBRANE_TRANSPORTER_ACTIVITY	SET	41	0.19726	0.0093452	0.12216	0.053195	0.738391488250653
GOBP_EPITHELIAL_FLUID_TRANSPORT	SET	12	0.39754	0.010197	0.24633	0.053287	0.738391488250653
GOBP_REGULATION_OF_VITAMIN_METABOLIC_PROCESS	SET	12	0.41517	0.010649	0.2574	0.053386	0.738391488250653
GOMF_PHOSPHATIDYLSERINE_BINDING	SET	66	0.17942	0.010777	0.1113	0.053481	0.738391488250653
GOMF_SODIUM_CHANNEL_ACTIVITY	SET	47	0.21714	0.011012	0.13474	0.053548	0.738391488250653
GOMF_WW_DOMAIN_BINDING	SET	22	0.27961	0.0097084	0.17356	0.053593	0.738391488250653
GOBP_REGULATION_OF_NUCLEOBASE_CONTAINING_COMPOUND_TRANSPORT	SET	17	0.27092	0.0082699	0.16816	0.053595	0.738391488250653
GOBP_FERROPTOSIS	SET	9	0.44423	0.0098688	0.27593	0.053716	0.738391488250653
GOBP_COENZYME_A_METABOLIC_PROCESS	SET	18	0.28173	0.0088489	0.17501	0.053734	0.738391488250653
GOBP_REGULATION_OF_CYTOPLASMIC_TRANSLATION	SET	32	0.22334	0.0093497	0.13876	0.053761	0.738391488250653
GOBP_NUCLEOSOME_ORGANIZATION	SET	115	0.13347	0.010568	0.082953	0.053822	0.738391488250653
GOMF_BETA_GALACTOSIDASE_ACTIVITY	SET	5	0.64735	0.01072	0.40255	0.053912	0.738391488250653
GOBP_REGULATION_OF_MITOCHONDRIAL_MEMBRANE_POTENTIAL	SET	70	0.15182	0.0093903	0.094439	0.053974	0.738391488250653
GOBP_REGULATION_OF_STEROID_HORMONE_BIOSYNTHETIC_PROCESS	SET	15	0.38027	0.010905	0.2366	0.054008	0.738391488250653
GOBP_REGULATION_OF_SYNAPTIC_VESICLE_TRANSPORT	SET	5	0.62251	0.010309	0.38732	0.054012	0.738391488250653
GOBP_LIPOPROTEIN_BIOSYNTHETIC_PROCESS	SET	95	0.12965	0.0093357	0.080698	0.054078	0.738391488250653
GOCC_RNA_CAP_BINDING_COMPLEX	SET	16	0.31131	0.0092196	0.19383	0.054131	0.738391488250653
GOBP_PEPTIDYL_LYSINE_MONOMETHYLATION	SET	9	0.40747	0.0090521	0.25376	0.054177	0.738391488250653
GOMF_MONOATOMIC_ION_TRANSMEMBRANE_TRANSPORTER_ACTIVITY	SET	719	0.051714	0.010066	0.032252	0.054427	0.739447958387516
GOMF_PROTEIN_SERINE_KINASE_ACTIVITY	SET	343	0.073772	0.010024	0.046012	0.05444	0.739447958387516
GOBP_REGULATION_OF_NEUTROPHIL_MEDIATED_CYTOTOXICITY	SET	5	0.60238	0.0099755	0.37576	0.054467	0.739447958387516
GOBP_NEGATIVE_REGULATION_OF_AUTOPHAGOSOME_ASSEMBLY	SET	11	0.32518	0.0079859	0.20316	0.054746	0.742270441558442
GOCC_SYNAPSE	SET	1416	0.037635	0.010074	0.023555	0.055059	0.74407390524968
GOCC_ACTIN_FILAMENT	SET	110	0.12674	0.0098159	0.079353	0.055127	0.74407390524968
GOBP_MOTOR_NEURON_MIGRATION	SET	13	0.43997	0.011746	0.27555	0.055177	0.74407390524968
GOMF_GLUCOSYLTRANSFERASE_ACTIVITY	SET	19	0.31625	0.010205	0.19823	0.055329	0.74407390524968
GOBP_POSITIVE_REGULATION_OF_PINOCYTOSIS	SET	7	0.4791	0.0093872	0.3005	0.055438	0.74407390524968
GOCC_PROTON_TRANSPORTING_ATP_SYNTHASE_COMPLEX_CATALYTIC_CORE_F_1	SET	5	0.53028	0.0087816	0.33282	0.055557	0.74407390524968
GOBP_NEGATIVE_REGULATION_OF_HEART_RATE	SET	10	0.41337	0.0096798	0.25949	0.055588	0.74407390524968
GOBP_POSITIVE_REGULATION_OF_PROTEIN_LOCALIZATION_TO_CENTROSOME	SET	7	0.40625	0.0079598	0.25502	0.055589	0.74407390524968
GOBP_REGULATION_OF_ESTABLISHMENT_OF_PLANAR_POLARITY	SET	14	0.35357	0.0097953	0.22199	0.055615	0.74407390524968
GOBP_SEQUESTERING_OF_TRIGLYCERIDE	SET	18	0.32547	0.010223	0.20436	0.055635	0.74407390524968
GOBP_GAMMA_DELTA_T_CELL_DIFFERENTIATION	SET	13	0.40519	0.010817	0.25446	0.055663	0.74407390524968
GOBP_ORGANIC_ACID_TRANSPORT	SET	337	0.075394	0.010156	0.047447	0.056037	0.746619389312977
GOBP_EMBRYONIC_VISCEROCRANIUM_MORPHOGENESIS	SET	10	0.45745	0.010712	0.28795	0.056077	0.746619389312977
GOBP_CHEMOREPULSION_OF_AXON	SET	6	0.52671	0.0095547	0.33165	0.056134	0.746619389312977
GOCC_MHC_PROTEIN_COMPLEX	SET	23	0.31109	0.011044	0.19593	0.056183	0.746619389312977
GOBP_AMYLOID_PRECURSOR_PROTEIN_CATABOLIC_PROCESS	SET	55	0.17626	0.0096679	0.11103	0.056211	0.746619389312977
GOBP_PIGMENT_ACCUMULATION	SET	11	0.43196	0.010608	0.27262	0.056555	0.750234053367217
GOBP_RESPONSE_TO_INORGANIC_SUBSTANCE	SET	489	0.060176	0.0097233	0.038061	0.056944	0.753746935687264
GOMF_L_GLUTAMATE_TRANSMEMBRANE_TRANSPORTER_ACTIVITY	SET	14	0.38486	0.010662	0.24358	0.057062	0.753746935687264
GOBP_POSITIVE_REGULATION_OF_SYNAPTIC_TRANSMISSION	SET	157	0.10616	0.0098102	0.067207	0.057108	0.753746935687264
GOCC_AXOLEMMA	SET	15	0.35787	0.010262	0.22666	0.057192	0.753746935687264
GOMF_PROTEIN_KINASE_A_CATALYTIC_SUBUNIT_BINDING	SET	14	0.37765	0.010462	0.23926	0.057245	0.753746935687264
GOBP_POSITIVE_REGULATION_OF_LEUKOCYTE_ADHESION_TO_VASCULAR_ENDOTHELIAL_CELL	SET	23	0.27704	0.0098349	0.17552	0.057253	0.753746935687264
GOBP_ORGANOPHOSPHATE_BIOSYNTHETIC_PROCESS	SET	551	0.054231	0.0092854	0.034378	0.057352	0.754099345088161
GOBP_RESPONSE_TO_L_GLUTAMATE	SET	15	0.33221	0.0095263	0.21087	0.057585	0.756210566037736
GOCC_MIDBODY	SET	201	0.086867	0.0090717	0.05517	0.057691	0.7566508040201
GOBP_NEGATIVE_REGULATION_OF_AMINO_ACID_TRANSPORT	SET	15	0.36337	0.01042	0.23095	0.057825	0.75693266583229
GOMF_PHOSPHATIDYLINOSITOL_3_PHOSPHATE_BINDING	SET	43	0.20077	0.0097403	0.12765	0.057892	0.75693266583229
GOBP_ACTIN_FILAMENT_DEPOLYMERIZATION	SET	58	0.16755	0.0094362	0.10655	0.05793	0.75693266583229
GOMF_CADMIUM_ION_BINDING	SET	5	0.60569	0.01003	0.38541	0.058036	0.75737
GOBP_CELL_JUNCTION_ASSEMBLY	SET	430	0.067143	0.01019	0.042752	0.058154	0.757962247191011
GOBP_MAINTENANCE_OF_PRESYNAPTIC_ACTIVE_ZONE_STRUCTURE	SET	5	0.62648	0.010375	0.39915	0.058271	0.758187211895911
GOBP_VERY_LONG_CHAIN_FATTY_ACID_BIOSYNTHETIC_PROCESS	SET	13	0.37555	0.010026	0.23936	0.058339	0.758187211895911
GOBP_DORSAL_VENTRAL_NEURAL_TUBE_PATTERNING	SET	16	0.32339	0.0095771	0.20624	0.058444	0.758187211895911
GOBP_SRP_DEPENDENT_COTRANSLATIONAL_PROTEIN_TARGETING_TO_MEMBRANE_TRANSLOCATION	SET	8	0.41676	0.0087294	0.26587	0.058501	0.758187211895911
GOBP_REGULATION_OF_MOLECULAR_FUNCTION	SET	1812	0.032701	0.0097848	0.020869	0.058566	0.758187211895911
GOMF_POTASSIUM_PROTON_ANTIPORTER_ACTIVITY	SET	12	0.39907	0.010236	0.25473	0.058607	0.758187211895911
GOBP_POSITIVE_REGULATION_OF_GASTRO_INTESTINAL_SYSTEM_SMOOTH_MUSCLE_CONTRACTION	SET	5	0.57175	0.0094683	0.36529	0.05878	0.758384117647059
GOBP_PROSTATE_GLANDULAR_ACINUS_MORPHOGENESIS	SET	6	0.62867	0.011404	0.40193	0.058902	0.758384117647059
GOCC_BETA_CATENIN_TCF_COMPLEX	SET	13	0.42281	0.011288	0.27034	0.058916	0.758384117647059
GOBP_REGULATION_OF_CELLULAR_RESPONSE_TO_HYPOXIA	SET	17	0.29072	0.0088744	0.1859	0.05893	0.758384117647059
GOBP_GALACTOSE_CATABOLIC_PROCESS	SET	6	0.52882	0.009593	0.33852	0.059134	0.758384117647059
GOCC_LEADING_EDGE_MEMBRANE	SET	175	0.097402	0.0094981	0.062352	0.059137	0.758384117647059
GOMF_SECONDARY_ACTIVE_MONOCARBOXYLATE_TRANSMEMBRANE_TRANSPORTER_ACTIVITY	SET	17	0.32956	0.01006	0.21105	0.05921	0.758384117647059
GOBP_RETROGRADE_NEURONAL_DENSE_CORE_VESICLE_TRANSPORT	SET	4	0.65844	0.0097531	0.4218	0.059268	0.758384117647059
GOBP_DOPAMINE_TRANSPORT	SET	44	0.20222	0.0099235	0.12955	0.059276	0.758384117647059
GOBP_REGULATION_OF_TRANS_SYNAPTIC_SIGNALING	SET	462	0.062441	0.0098143	0.040026	0.059389	0.758899828641371
GOBP_ESTABLISHMENT_OF_PROTEIN_LOCALIZATION_TO_ORGANELLE	SET	431	0.061701	0.0093751	0.039604	0.059632	0.759367980652963
GOBP_REGULATION_OF_APOPTOTIC_SIGNALING_PATHWAY	SET	362	0.069158	0.009649	0.044397	0.05966	0.759367980652963
GOMF_PROTEIN_PRENYLTRANSFERASE_ACTIVITY	SET	6	0.41002	0.007438	0.26326	0.059685	0.759367980652963
GOBP_NEGATIVE_REGULATION_OF_PROTEASOMAL_UBIQUITIN_DEPENDENT_PROTEIN_CATABOLIC_PROCESS	SET	35	0.22381	0.0097982	0.1438	0.059808	0.759367980652963
GOBP_POSITIVE_REGULATION_OF_FATTY_ACID_BETA_OXIDATION	SET	9	0.4614	0.01025	0.29662	0.059922	0.759367980652963
GOBP_NEUTROPHIL_ACTIVATION_INVOLVED_IN_IMMUNE_RESPONSE	SET	20	0.27367	0.0090605	0.17597	0.05996	0.759367980652963
GOMF_PLUS_END_DIRECTED_MICROTUBULE_MOTOR_ACTIVITY	SET	16	0.33464	0.0099103	0.21525	0.060028	0.759367980652963
GOBP_REGULATION_OF_SEQUESTERING_OF_TRIGLYCERIDE	SET	15	0.34562	0.0099109	0.22236	0.060063	0.759367980652963
GOBP_POSITIVE_REGULATION_OF_AMYLOID_FIBRIL_FORMATION	SET	5	0.63794	0.010564	0.41061	0.060145	0.759367980652963
GOBP_EPIGENETIC_PROGRAMMING_IN_THE_ZYGOTIC_PRONUCLEI	SET	14	0.32888	0.0091114	0.2117	0.060153	0.759367980652963
GOMF_FATTY_ACID_BINDING	SET	47	0.19406	0.0098417	0.12523	0.060618	0.762648141176471
GOMF_NADPLUS_PROTEIN_ARGININE_ADP_RIBOSYLTRANSFERASE_ACTIVITY	SET	6	0.53599	0.0097231	0.34594	0.060651	0.762648141176471
GOCC_RUFFLE	SET	179	0.095526	0.0094199	0.0617	0.060793	0.762648141176471
GOBP_SPERMATID_DIFFERENTIATION	SET	215	0.086773	0.0093685	0.056057	0.060828	0.762648141176471
GOBP_ELECTRON_TRANSPORT_CHAIN	SET	113	0.11263	0.0088405	0.072807	0.060948	0.762648141176471
GOBP_PROTEIN_IMPORT_INTO_PEROXISOME_MATRIX	SET	14	0.29637	0.0082106	0.1919	0.061251	0.762648141176471
GOMF_CO_RECEPTOR_BINDING	SET	13	0.31083	0.0082982	0.20131	0.061293	0.762648141176471
GOBP_NEGATIVE_REGULATION_OF_CHEMOKINE_MEDIATED_SIGNALING_PATHWAY	SET	6	0.51116	0.0092726	0.33113	0.061341	0.762648141176471
GOBP_RESPONSE_TO_ACID_CHEMICAL	SET	127	0.11278	0.0093809	0.073125	0.061518	0.762648141176471
GOMF_THYROID_HORMONE_BINDING	SET	6	0.57075	0.010354	0.3702	0.061577	0.762648141176471
GOBP_ERYTHROCYTE_DEVELOPMENT	SET	40	0.19017	0.008899	0.12336	0.0616	0.762648141176471
GOBP_CYTOSOLIC_RIBOSOME_ASSEMBLY	SET	8	0.38988	0.0081663	0.25306	0.061705	0.762648141176471
GOMF_PROTEIN_TYROSINE_SERINE_THREONINE_PHOSPHATASE_ACTIVITY	SET	26	0.25167	0.0094985	0.16339	0.061746	0.762648141176471
GOBP_NEGATIVE_REGULATION_OF_HYDROLASE_ACTIVITY	SET	175	0.10104	0.0098525	0.065603	0.061774	0.762648141176471
GOBP_POSITIVE_REGULATION_OF_SODIUM_ION_TRANSPORT	SET	28	0.26135	0.010235	0.16969	0.061774	0.762648141176471
GOBP_GLIAL_CELL_DERIVED_NEUROTROPHIC_FACTOR_RECEPTOR_SIGNALING_PATHWAY	SET	15	0.32214	0.0092375	0.20918	0.061784	0.762648141176471
GOMF_C3HC4_TYPE_RING_FINGER_DOMAIN_BINDING	SET	6	0.55593	0.010085	0.36116	0.061874	0.762648141176471
GOBP_POSITIVE_REGULATION_OF_PODOSOME_ASSEMBLY	SET	10	0.48034	0.011248	0.31205	0.061877	0.762648141176471
GOBP_POSITIVE_REGULATION_OF_PROTEIN_DEACETYLATION	SET	6	0.44768	0.0081212	0.29092	0.061926	0.762648141176471
GOBP_PIGMENT_GRANULE_ORGANIZATION	SET	37	0.20882	0.009399	0.13576	0.062009	0.762648141176471
GOMF_TRANSPORTER_ACTIVITY	SET	1166	0.039347	0.0096283	0.025583	0.062027	0.762648141176471
GOMF_SOLUTE_PROTON_SYMPORTER_ACTIVITY	SET	24	0.27049	0.0098089	0.17591	0.062075	0.762648141176471
GOCC_NADPH_OXIDASE_COMPLEX	SET	13	0.32828	0.0087641	0.21352	0.062093	0.762648141176471
GOMF_SOLUTE_POTASSIUM_ANTIPORTER_ACTIVITY	SET	17	0.33119	0.01011	0.21553	0.062201	0.763076897767333
GOBP_ECTOPIC_GERM_CELL_PROGRAMMED_CELL_DEATH	SET	17	0.30796	0.0094005	0.20062	0.0624	0.764619718309859
GOBP_REGULATION_OF_PHOSPHOPROTEIN_PHOSPHATASE_ACTIVITY	SET	39	0.19949	0.0092179	0.13014	0.062657	0.766868792497069
GOBP_MALATE_METABOLIC_PROCESS	SET	9	0.46736	0.010383	0.30531	0.062924	0.769234847775176
GOMF_PROTON_TRANSMEMBRANE_TRANSPORTER_ACTIVITY	SET	163	0.094314	0.0088789	0.0617	0.063193	0.769406474226804
GOBP_PROTEIN_LOCALIZATION_TO_NUCLEUS	SET	306	0.072097	0.0092628	0.047195	0.063309	0.769406474226804
GOMF_ALKALI_METAL_ION_BINDING	SET	19	0.29936	0.0096602	0.1961	0.063444	0.769406474226804
GOBP_REGULATION_OF_LEUKOCYTE_MIGRATION	SET	220	0.087726	0.0095796	0.057468	0.063449	0.769406474226804
GOBP_CHOLESTEROL_CATABOLIC_PROCESS	SET	9	0.43788	0.0097277	0.28729	0.063742	0.769406474226804
GOBP_REGULATION_OF_PROTEIN_DEPHOSPHORYLATION	SET	71	0.14914	0.0092901	0.097854	0.06375	0.769406474226804
GOBP_NEGATIVE_REGULATION_OF_SYNAPTIC_TRANSMISSION_GLUTAMATERGIC	SET	8	0.49974	0.010467	0.32833	0.064006	0.769406474226804
GOBP_NATURAL_KILLER_CELL_ACTIVATION_INVOLVED_IN_IMMUNE_RESPONSE	SET	34	0.2517	0.010861	0.16549	0.064146	0.769406474226804
GOBP_POSITIVE_REGULATION_OF_MYOBLAST_DIFFERENTIATION	SET	43	0.20198	0.0097987	0.13286	0.064238	0.769406474226804
GOBP_PROTEIN_O_LINKED_GLYCOSYLATION_VIA_SERINE	SET	10	0.42132	0.0098659	0.27721	0.064281	0.769406474226804
GOBP_TONGUE_DEVELOPMENT	SET	21	0.31363	0.010639	0.20657	0.064481	0.769406474226804
GOCC_GOLGI_APPARATUS	SET	1563	0.032778	0.0091777	0.021608	0.064656	0.769406474226804
GOBP_MESENCHYMAL_CELL_MIGRATION	SET	59	0.17234	0.0097894	0.11363	0.06468	0.769406474226804
GOBP_RADIAL_GLIA_GUIDED_PYRAMIDAL_NEURON_MIGRATION	SET	6	0.61425	0.011143	0.40513	0.064745	0.769406474226804
GOBP_REGULATION_OF_PROTEOLYSIS	SET	550	0.054719	0.0093608	0.036133	0.064972	0.769406474226804
GOMF_ENDOPEPTIDASE_ACTIVATOR_ACTIVITY	SET	19	0.28167	0.0090894	0.18601	0.06499	0.769406474226804
GOMF_LONG_CHAIN_FATTY_ACID_BINDING	SET	17	0.30317	0.0092543	0.20029	0.065072	0.769406474226804
GOMF_PROTEIN_SERINE_THREONINE_PHOSPHATASE_INHIBITOR_ACTIVITY	SET	12	0.33114	0.0084937	0.2188	0.065096	0.769406474226804
GOBP_POSITIVE_REGULATION_OF_ARP2_3_COMPLEX_MEDIATED_ACTIN_NUCLEATION	SET	8	0.46065	0.0096485	0.30444	0.065135	0.769406474226804
GOBP_REGULATION_OF_NEUTROPHIL_DEGRANULATION	SET	8	0.43612	0.0091348	0.28844	0.065275	0.769406474226804
GOBP_PROTEIN_DNA_COMPLEX_DISASSEMBLY	SET	23	0.26662	0.0094651	0.17643	0.065383	0.769406474226804
GOBP_REGULATION_OF_OSTEOBLAST_DIFFERENTIATION	SET	126	0.11981	0.0099269	0.079289	0.065397	0.769406474226804
GOBP_POSITIVE_REGULATION_OF_PROTEIN_BINDING	SET	48	0.18386	0.0094227	0.12171	0.065455	0.769406474226804
GOMF_CARBOHYDRATE_PROTON_SYMPORTER_ACTIVITY	SET	7	0.55494	0.010873	0.36739	0.065467	0.769406474226804
GOCC_PROTON_TRANSPORTING_ATP_SYNTHASE_COMPLEX	SET	20	0.22585	0.0074773	0.14964	0.065626	0.769406474226804
GOBP_REGULATION_OF_MIRNA_CATABOLIC_PROCESS	SET	5	0.55714	0.0092263	0.36941	0.065762	0.769406474226804
GOBP_GLUTAMATE_SECRETION	SET	28	0.25262	0.0098938	0.1676	0.06587	0.769406474226804
GOBP_NEGATIVE_REGULATION_OF_GLUCOCORTICOID_METABOLIC_PROCESS	SET	5	0.63318	0.010486	0.42014	0.065905	0.769406474226804
GOBP_SODIUM_ION_TRANSMEMBRANE_TRANSPORT	SET	177	0.10159	0.0099628	0.067417	0.065921	0.769406474226804
GOBP_NEUTROPHIL_DEGRANULATION	SET	13	0.33308	0.0088922	0.22106	0.065946	0.769406474226804
GOBP_T_CELL_DIFFERENTIATION_IN_THYMUS	SET	85	0.13943	0.009499	0.092552	0.065986	0.769406474226804
GOMF_N6_METHYLADENOSINE_CONTAINING_RNA_READER_ACTIVITY	SET	11	0.39114	0.0096059	0.2597	0.066026	0.769406474226804
GOBP_RESPONSE_TO_CADMIUM_ION	SET	56	0.17955	0.0099369	0.11929	0.066146	0.769406474226804
GOBP_POSITIVE_REGULATION_OF_CEREBELLAR_GRANULE_CELL_PRECURSOR_PROLIFERATION	SET	6	0.57795	0.010484	0.38431	0.066318	0.769406474226804
GOBP_LIPOPROTEIN_CATABOLIC_PROCESS	SET	15	0.36736	0.010534	0.24433	0.066359	0.769406474226804
GOCC_GLYCINERGIC_SYNAPSE	SET	7	0.55467	0.010868	0.36893	0.06637	0.769406474226804
GOBP_BRANCHING_INVOLVED_IN_BLOOD_VESSEL_MORPHOGENESIS	SET	34	0.24104	0.010401	0.1604	0.066462	0.769406474226804
GOBP_POSITIVE_REGULATION_OF_HYDROLASE_ACTIVITY	SET	424	0.062703	0.0094516	0.041735	0.066505	0.769406474226804
GOBP_REGULATION_OF_MICROVILLUS_ASSEMBLY	SET	6	0.60922	0.011052	0.40557	0.066542	0.769406474226804
GOBP_NEGATIVE_REGULATION_OF_ORGANELLE_ASSEMBLY	SET	43	0.17342	0.0084132	0.11552	0.066664	0.769406474226804
GOBP_PARAXIAL_MESODERM_FORMATION	SET	7	0.4419	0.0086582	0.29447	0.066729	0.769406474226804
GOBP_PROTEIN_UNFOLDING	SET	5	0.41109	0.0068077	0.27395	0.066737	0.769406474226804
GOBP_POSITIVE_REGULATION_OF_SEQUESTERING_OF_TRIGLYCERIDE	SET	9	0.4407	0.0097903	0.29372	0.066762	0.769406474226804
GOCC_GLUTAMATERGIC_SYNAPSE	SET	401	0.064651	0.0094832	0.043089	0.066763	0.769406474226804
GOCC_RUFFLE_MEMBRANE	SET	99	0.12047	0.0088544	0.080423	0.067079	0.769406474226804
GOBP_REGULATION_OF_FATTY_ACID_METABOLIC_PROCESS	SET	84	0.13731	0.0092997	0.091683	0.067125	0.769406474226804
GOMF_FRIZZLED_BINDING	SET	36	0.20787	0.0092291	0.13887	0.067222	0.769406474226804
GOBP_NUCLEOTIDE_EXCISION_REPAIR	SET	80	0.13347	0.0088231	0.089202	0.067299	0.769406474226804
GOBP_NEGATIVE_REGULATION_OF_NUCLEOCYTOPLASMIC_TRANSPORT	SET	23	0.26792	0.0095111	0.17906	0.067303	0.769406474226804
GOBP_NEGATIVE_REGULATION_OF_CELLULAR_RESPONSE_TO_INSULIN_STIMULUS	SET	41	0.19149	0.0090716	0.12801	0.067359	0.769406474226804
GOBP_NONRIBOSOMAL_PEPTIDE_BIOSYNTHETIC_PROCESS	SET	17	0.31853	0.0097233	0.21298	0.067391	0.769406474226804
GOBP_INFLAMMATORY_RESPONSE	SET	806	0.046037	0.0094644	0.0308	0.067509	0.769406474226804
GOMF_OXIDOREDUCTASE_ACTIVITY_ACTING_ON_OTHER_NITROGENOUS_COMPOUNDS_AS_DONORS_CYTOCHROME_AS_ACCEPTOR	SET	4	0.63574	0.0094168	0.4255	0.067582	0.769406474226804
GOMF_THIOREDOXIN_DEPENDENT_PEROXIREDOXIN_ACTIVITY	SET	5	0.51043	0.0084528	0.34171	0.067633	0.769406474226804
GOBP_LEUKOTRIENE_D4_METABOLIC_PROCESS	SET	8	0.41016	0.0085911	0.2746	0.067641	0.769406474226804
GOBP_NUCLEOSIDE_TRIPHOSPHATE_METABOLIC_PROCESS	SET	248	0.073587	0.008525	0.049284	0.06771	0.769406474226804
GOMF_GPI_LINKED_EPHRIN_RECEPTOR_ACTIVITY	SET	6	0.58054	0.010531	0.38962	0.068119	0.769406474226804
GOBP_RIG_I_SIGNALING_PATHWAY	SET	28	0.23245	0.0091038	0.15609	0.068219	0.769406474226804
GOBP_MITOPHAGY	SET	63	0.14697	0.0086256	0.098702	0.068249	0.769406474226804
GOBP_ROOF_OF_MOUTH_DEVELOPMENT	SET	90	0.1433	0.010045	0.096244	0.068261	0.769406474226804
GOBP_CELLULAR_RESPONSE_TO_STEROL_DEPLETION	SET	15	0.33302	0.0095495	0.22383	0.068402	0.769406474226804
GOBP_CELLULAR_RESPONSE_TO_AMYLOID_BETA	SET	40	0.2127	0.0099533	0.14296	0.068407	0.769406474226804
GOBP_POSITIVE_REGULATION_OF_EXCITATORY_POSTSYNAPTIC_POTENTIAL	SET	31	0.22908	0.0094392	0.15404	0.068499	0.769406474226804
GOMF_MANNOSYL_OLIGOSACCHARIDE_MANNOSIDASE_ACTIVITY	SET	9	0.3969	0.0088173	0.26697	0.068559	0.769406474226804
GOBP_CHEMICAL_SYNAPTIC_TRANSMISSION_POSTSYNAPTIC	SET	110	0.12372	0.0095819	0.083239	0.068611	0.769406474226804
GOMF_3_BETA_HYDROXY_DELTA5_STEROID_DEHYDROGENASE_ACTIVITY	SET	4	0.63347	0.0093832	0.42621	0.068612	0.769406474226804
GOBP_REGULATION_OF_MRNA_EXPORT_FROM_NUCLEUS	SET	8	0.34736	0.0072757	0.23384	0.068722	0.769406474226804
GOBP_CYSTEINE_CATABOLIC_PROCESS	SET	4	0.63019	0.0093346	0.42427	0.068733	0.769406474226804
GOBP_FRUCTOSE_TRANSMEMBRANE_TRANSPORT	SET	10	0.38719	0.0090668	0.26071	0.068764	0.769406474226804
GOBP_INTRACELLULAR_PH_REDUCTION	SET	52	0.16136	0.0086062	0.10865	0.068772	0.769406474226804
GOBP_RNA_STABILIZATION	SET	68	0.14887	0.0090759	0.10028	0.068838	0.769406474226804
GOCC_DENDRITE_CYTOPLASM	SET	25	0.22048	0.0081597	0.14862	0.068983	0.769406474226804
GOCC_ENDOPLASMIC_RETICULUM_GOLGI_INTERMEDIATE_COMPARTMENT	SET	126	0.10933	0.0090584	0.073721	0.069047	0.769406474226804
GOBP_SYNAPTIC_SIGNALING	SET	740	0.047804	0.0094346	0.032258	0.069191	0.769406474226804
GOBP_RESPONSE_TO_ENDOPLASMIC_RETICULUM_STRESS	SET	256	0.073974	0.008705	0.049923	0.069212	0.769406474226804
GOCC_EUKARYOTIC_TRANSLATION_INITIATION_FACTOR_4F_COMPLEX	SET	13	0.33058	0.0088253	0.22312	0.069236	0.769406474226804
GOBP_ANTIGEN_PROCESSING_AND_PRESENTATION_OF_EXOGENOUS_PEPTIDE_ANTIGEN_VIA_MHC_CLASS_II	SET	29	0.24385	0.0097191	0.16465	0.069304	0.769406474226804
GOBP_POSITIVE_REGULATION_OF_SULFUR_METABOLIC_PROCESS	SET	5	0.53865	0.0089203	0.36372	0.06932	0.769406474226804
GOBP_POSITIVE_REGULATION_OF_CYTOKINESIS	SET	47	0.18531	0.009398	0.12515	0.069354	0.769406474226804
GOBP_POSITIVE_REGULATION_OF_TROPHOBLAST_CELL_MIGRATION	SET	7	0.44684	0.0087551	0.30185	0.069402	0.769406474226804
GOMF_ADENYL_NUCLEOTIDE_BINDING	SET	1561	0.032047	0.0089679	0.021655	0.069461	0.769406474226804
GOBP_NEGATIVE_REGULATION_OF_TOR_SIGNALING	SET	67	0.14169	0.0085748	0.095808	0.069591	0.769406474226804
GOCC_RNA_POLYMERASE_II_HOLOENZYME	SET	69	0.13151	0.0080764	0.088955	0.069655	0.769406474226804
GOMF_HETEROTRIMERIC_G_PROTEIN_BINDING	SET	5	0.58538	0.009694	0.3961	0.069731	0.769406474226804
GOMF_CALCIUM_MONOATOMIC_CATION_ANTIPORTER_ACTIVITY	SET	13	0.36451	0.0097312	0.2467	0.069774	0.769406474226804
GOCC_TRANSCRIPTION_FACTOR_TFIID_COMPLEX	SET	30	0.20005	0.0081094	0.1354	0.069784	0.769406474226804
GOMF_PROTEIN_KINASE_A_REGULATORY_SUBUNIT_BINDING	SET	24	0.26482	0.0096032	0.17928	0.069828	0.769406474226804
GOBP_RESPONSE_TO_STEROL_DEPLETION	SET	17	0.31498	0.0096151	0.21328	0.069867	0.769406474226804
GOBP_NEURON_CELL_CELL_ADHESION	SET	13	0.38349	0.010238	0.25976	0.069938	0.769406474226804
GOBP_GROWTH_PLATE_CARTILAGE_CHONDROCYTE_DIFFERENTIATION	SET	9	0.48919	0.010868	0.33138	0.069952	0.769406474226804
GOBP_ESTABLISHMENT_OF_ORGANELLE_LOCALIZATION	SET	460	0.055724	0.0087401	0.037753	0.069976	0.769406474226804
GOBP_REGULATION_OF_GASTRULATION	SET	16	0.32416	0.0096	0.21966	0.070013	0.769406474226804
GOBP_GLYCEROPHOSPHOLIPID_BIOSYNTHETIC_PROCESS	SET	198	0.083412	0.0086463	0.056591	0.070257	0.769406474226804
GOBP_PHOSPHATIDYLINOSITOL_ACYL_CHAIN_REMODELING	SET	6	0.55588	0.010084	0.37736	0.070373	0.769406474226804
GOBP_SEMAPHORIN_PLEXIN_SIGNALING_PATHWAY	SET	43	0.18028	0.008746	0.12238	0.070377	0.769406474226804
GOMF_EXTRACELLULAR_MATRIX_STRUCTURAL_CONSTITUENT_CONFERRING_COMPRESSION_RESISTANCE	SET	19	0.29964	0.0096691	0.20348	0.070445	0.769406474226804
GOBP_CORTISOL_BIOSYNTHETIC_PROCESS	SET	10	0.418	0.0097881	0.28388	0.070462	0.769406474226804
GOCC_PHOSPHATASE_COMPLEX	SET	52	0.16456	0.0087768	0.11176	0.070471	0.769406474226804
GOCC_STEREOCILIUM_BUNDLE	SET	64	0.1558	0.009216	0.10584	0.070509	0.769406474226804
GOMF_MISMATCH_REPAIR_COMPLEX_BINDING	SET	11	0.3611	0.0088681	0.24533	0.070538	0.769406474226804
GOBP_NEGATIVE_REGULATION_OF_TOLL_LIKE_RECEPTOR_SIGNALING_PATHWAY	SET	19	0.28416	0.0091699	0.19309	0.070567	0.769406474226804
GOBP_POSITIVE_REGULATION_OF_HEMOPOIESIS	SET	186	0.091107	0.0091564	0.061924	0.070619	0.769406474226804
GOCC_ANNULATE_LAMELLAE	SET	5	0.54852	0.0090837	0.37306	0.070745	0.769406474226804
GOBP_REGULATION_OF_CHEMOKINE_MEDIATED_SIGNALING_PATHWAY	SET	9	0.42239	0.0093836	0.28732	0.070773	0.769406474226804
GOBP_REGULATION_OF_ENDOPLASMIC_RETICULUM_UNFOLDED_PROTEIN_RESPONSE	SET	28	0.23783	0.0093142	0.16185	0.070868	0.769406474226804
GOBP_REGULATION_OF_UBIQUITIN_PROTEIN_TRANSFERASE_ACTIVITY	SET	35	0.21554	0.0094359	0.14673	0.070934	0.769406474226804
GOBP_POSITIVE_REGULATION_OF_ANOIKIS	SET	6	0.49255	0.008935	0.33544	0.07101	0.769406474226804
GOBP_PHOSPHOLIPASE_C_ACTIVATING_DOPAMINE_RECEPTOR_SIGNALING_PATHWAY	SET	9	0.46998	0.010441	0.3203	0.071156	0.769406474226804
GOBP_REGULATION_OF_ANATOMICAL_STRUCTURE_SIZE	SET	472	0.057952	0.0092043	0.039501	0.07118	0.769406474226804
GOBP_REGULATION_OF_NEUROTRANSMITTER_UPTAKE	SET	18	0.27681	0.0086944	0.18879	0.071299	0.769406474226804
GOCC_MLL3_4_COMPLEX	SET	10	0.27839	0.006519	0.18989	0.071324	0.769406474226804
GOMF_FRUCTOSE_TRANSMEMBRANE_TRANSPORTER_ACTIVITY	SET	9	0.39721	0.0088242	0.271	0.071375	0.769406474226804
GOMF_LYSOPHOSPHOLIPASE_ACTIVITY	SET	26	0.22622	0.0085378	0.15436	0.0714	0.769406474226804
GOMF_ATPASE_ACTIVATOR_ACTIVITY	SET	25	0.24306	0.0089955	0.16589	0.071449	0.769406474226804
GOMF_LEUKOTRIENE_C4_GAMMA_GLUTAMYL_TRANSFERASE_ACTIVITY	SET	4	0.61326	0.0090839	0.41861	0.071471	0.769406474226804
GOMF_ATPASE_COUPLED_MONOATOMIC_CATION_TRANSMEMBRANE_TRANSPORTER_ACTIVITY	SET	52	0.16773	0.008946	0.1145	0.071487	0.769406474226804
GOBP_REGULATION_OF_ANATOMICAL_STRUCTURE_MORPHOGENESIS	SET	788	0.045984	0.0093522	0.031412	0.071623	0.770076333676622
GOBP_AUTOPHAGOSOME_ORGANIZATION	SET	116	0.10591	0.0084221	0.072411	0.071797	0.770532086330935
GOBP_SECONDARY_PALATE_DEVELOPMENT	SET	26	0.24881	0.0093904	0.17013	0.071813	0.770532086330935
GOCC_UNIPLEX_COMPLEX	SET	6	0.58941	0.010692	0.40366	0.072133	0.772709907692308
GOBP_NEGATIVE_REGULATION_OF_AUTOPHAGOSOME_MATURATION	SET	5	0.4998	0.0082768	0.34235	0.072164	0.772709907692308
GOBP_POSITIVE_REGULATION_OF_NUCLEOCYTOPLASMIC_TRANSPORT	SET	61	0.1598	0.0092292	0.10953	0.072301	0.773383647540984
GOBP_ATRIAL_SEPTUM_DEVELOPMENT	SET	23	0.28869	0.010248	0.19825	0.072677	0.776609907881269
GOMF_RETINOIC_ACID_BINDING	SET	26	0.28506	0.010759	0.19607	0.072999	0.77798752293578
GOBP_NEGATIVE_REGULATION_OF_MYELINATION	SET	9	0.43456	0.009654	0.29891	0.073007	0.77798752293578
GOBP_COP9_SIGNALOSOME_ASSEMBLY	SET	5	0.39492	0.00654	0.2717	0.073049	0.77798752293578
GOBP_REGULATION_OF_MICROVILLUS_ORGANIZATION	SET	13	0.31744	0.0084747	0.21846	0.073104	0.77798752293578
GOBP_CEREBRAL_CORTEX_GABAERGIC_INTERNEURON_DIFFERENTIATION	SET	9	0.47334	0.010515	0.32596	0.073237	0.778609246435845
GOBP_BEHAVIORAL_RESPONSE_TO_COCAINE	SET	16	0.32247	0.00955	0.22244	0.07358	0.779569261880688
GOMF_UBIQUITIN_PROTEIN_TRANSFERASE_INHIBITOR_ACTIVITY	SET	12	0.38563	0.0098914	0.26617	0.073708	0.779569261880688
GOBP_ISOCITRATE_METABOLIC_PROCESS	SET	5	0.53792	0.0089082	0.37132	0.073721	0.779569261880688
GOBP_GALACTOSE_CATABOLIC_PROCESS_VIA_UDP_GALACTOSE	SET	5	0.49774	0.0082428	0.34362	0.073743	0.779569261880688
GOBP_REGULATION_OF_MITOCHONDRION_ORGANIZATION	SET	143	0.096322	0.0084982	0.066505	0.073768	0.779569261880688
GOMF_SMALL_RIBOSOMAL_SUBUNIT_RRNA_BINDING	SET	8	0.42976	0.0090015	0.29681	0.07383	0.779569261880688
GOBP_BONE_CELL_DEVELOPMENT	SET	18	0.28797	0.0090451	0.19891	0.07385	0.779569261880688
GOBP_LIPID_HOMEOSTASIS	SET	158	0.09684	0.0089771	0.066924	0.073955	0.779889090909091
GOBP_ORGANELLE_LOCALIZATION	SET	583	0.048197	0.0084808	0.033321	0.074036	0.779955438950555
GOBP_REGULATION_OF_ERAD_PATHWAY	SET	22	0.24214	0.0084073	0.16748	0.074126	0.780116370967742
GOBP_POSITIVE_REGULATION_OF_MITOTIC_CYTOKINESIS	SET	13	0.30455	0.0081304	0.21081	0.07429	0.780437263581489
GOBP_POSITIVE_REGULATION_OF_SODIUM_PROTON_ANTIPORTER_ACTIVITY	SET	5	0.56953	0.0094315	0.39427	0.074306	0.780437263581489
GOBP_CARNITINE_TRANSMEMBRANE_TRANSPORT	SET	6	0.49669	0.0090101	0.34418	0.074508	0.781772381909548
GOBP_POSITIVE_REGULATION_OF_CATECHOLAMINE_SECRETION	SET	12	0.35641	0.0091419	0.24718	0.074677	0.782017657657658
GOCC_TRIGLYCERIDE_RICH_PLASMA_LIPOPROTEIN_PARTICLE	SET	19	0.29307	0.0094574	0.20327	0.074684	0.782017657657658
GOBP_RECEPTOR_RECYCLING	SET	46	0.1696	0.0085092	0.11767	0.074757	0.782017657657658
GOBP_MULTICELLULAR_ORGANISMAL_LEVEL_HOMEOSTASIS	SET	780	0.044992	0.009106	0.031227	0.074831	0.782017657657658
GOCC_CHROMOSOME_CENTROMERIC_REGION	SET	247	0.072977	0.0084376	0.050696	0.075011	0.783115
GOCC_AGGRESOME	SET	33	0.20355	0.008653	0.14181	0.075607	0.788548531468531
GOMF_NADPLUS_PROTEIN_CYSTEINE_ADP_RIBOSYLTRANSFERASE_ACTIVITY	SET	6	0.57851	0.010494	0.40377	0.075968	0.789746315789474
GOBP_VENTRAL_SPINAL_CORD_DEVELOPMENT	SET	45	0.20259	0.010054	0.14143	0.076023	0.789746315789474
GOBP_BEHAVIORAL_RESPONSE_TO_PAIN	SET	19	0.27545	0.0088888	0.19236	0.076083	0.789746315789474
GOBP_TRANSCRIPTION_DEPENDENT_TETHERING_OF_RNA_POLYMERASE_II_GENE_DNA_AT_NUCLEAR_PERIPHERY	SET	7	0.33562	0.0065759	0.23452	0.076209	0.789746315789474
GOBP_CORPUS_CALLOSUM_DEVELOPMENT	SET	26	0.25874	0.0097653	0.18082	0.076231	0.789746315789474
GOBP_CELLULAR_RESPONSE_TO_CARBOHYDRATE_STIMULUS	SET	142	0.10029	0.0088175	0.070097	0.076262	0.789746315789474
GOBP_REGULATION_OF_SYNAPTIC_TRANSMISSION_GABAERGIC	SET	35	0.19647	0.0086012	0.13736	0.076322	0.789746315789474
GOBP_REGULATION_OF_SREBP_SIGNALING_PATHWAY	SET	7	0.49775	0.0097525	0.34823	0.076458	0.789746315789474
GOBP_CHONDROCYTE_DIFFERENTIATION_INVOLVED_IN_ENDOCHONDRAL_BONE_MORPHOGENESIS	SET	14	0.35795	0.0099167	0.25049	0.076506	0.789746315789474
GOBP_PROTEIN_LOCALIZATION_TO_CILIARY_TRANSITION_ZONE	SET	8	0.37859	0.0079298	0.26493	0.07651	0.789746315789474
GOCC_MANCHETTE	SET	21	0.26996	0.0091579	0.189	0.076605	0.789746315789474
GOMF_DIACYLGLYCEROL_BINDING	SET	13	0.3189	0.0085137	0.22339	0.076721	0.789746315789474
GOBP_PEPTIDYL_GLUTAMIC_ACID_MODIFICATION	SET	26	0.22254	0.0083991	0.15599	0.076855	0.789746315789474
GOBP_REGULATION_OF_PROTEASOMAL_UBIQUITIN_DEPENDENT_PROTEIN_CATABOLIC_PROCESS	SET	120	0.10811	0.0087427	0.0758	0.076914	0.789746315789474
GOBP_ISOPRENOID_CATABOLIC_PROCESS	SET	10	0.39514	0.0092528	0.27735	0.077136	0.789746315789474
GOBP_POSITIVE_REGULATION_OF_WNT_SIGNALING_PATHWAY_PLANAR_CELL_POLARITY_PATHWAY	SET	8	0.4815	0.010085	0.33802	0.077167	0.789746315789474
GOBP_POSITIVE_REGULATION_OF_CENTRIOLE_ELONGATION	SET	5	0.57569	0.0095335	0.40423	0.07721	0.789746315789474
GOBP_PROTEIN_EXPORT_FROM_NUCLEUS	SET	59	0.14552	0.0082658	0.10219	0.07722	0.789746315789474
GOCC_CUL3_RING_UBIQUITIN_LIGASE_COMPLEX	SET	37	0.1898	0.0085427	0.13328	0.07723	0.789746315789474
GOBP_DETOXIFICATION	SET	144	0.10288	0.0091084	0.072263	0.077271	0.789746315789474
GOBP_BRANCHING_INVOLVED_IN_LABYRINTHINE_LAYER_MORPHOGENESIS	SET	13	0.37434	0.0099936	0.2631	0.077408	0.789746315789474
GOBP_EPIGENETIC_PROGRAMMING_OF_GENE_EXPRESSION	SET	30	0.20923	0.0084814	0.14715	0.077544	0.789746315789474
GOBP_INSULIN_METABOLIC_PROCESS	SET	16	0.31961	0.0094652	0.22481	0.077565	0.789746315789474
GOBP_PHOSPHATIDYLETHANOLAMINE_BIOSYNTHETIC_PROCESS	SET	10	0.34379	0.0080504	0.24182	0.077567	0.789746315789474
GOBP_REGULATION_OF_SKELETAL_MUSCLE_ACETYLCHOLINE_GATED_CHANNEL_CLUSTERING	SET	7	0.39095	0.00766	0.27505	0.077613	0.789746315789474
GOCC_ORGANELLE_MEMBRANE_CONTACT_SITE	SET	46	0.17543	0.008802	0.12347	0.077693	0.789790574488802
GOBP_RESPONSE_TO_REACTIVE_OXYGEN_SPECIES	SET	189	0.083618	0.0084705	0.058885	0.077808	0.790190194552529
GOBP_PROTEIN_CONTAINING_COMPLEX_DISASSEMBLY	SET	248	0.071036	0.0082294	0.050043	0.077886	0.790200691642651
GOBP_VESICLE_TETHERING_INVOLVED_IN_EXOCYTOSIS	SET	9	0.41922	0.0093132	0.29568	0.078132	0.790200691642651
GOBP_PIGMENT_GRANULE_MATURATION	SET	10	0.40223	0.0094189	0.28372	0.078147	0.790200691642651
GOMF_GLYCOGEN_BINDING	SET	7	0.50413	0.0098777	0.35584	0.078289	0.790200691642651
GOCC_COMPACT_MYELIN	SET	14	0.32284	0.0089438	0.22798	0.078387	0.790200691642651
GOBP_CELLULAR_COMPONENT_DISASSEMBLY	SET	519	0.049965	0.0083103	0.03529	0.078421	0.790200691642651
GOBP_REGULATION_OF_CELL_MORPHOGENESIS	SET	230	0.080959	0.0090368	0.057206	0.078511	0.790200691642651
GOBP_POSITIVE_REGULATION_OF_VASCULAR_ENDOTHELIAL_GROWTH_FACTOR_RECEPTOR_SIGNALING_PATHWAY	SET	14	0.3247	0.0089955	0.22947	0.078542	0.790200691642651
GOMF_INTRACELLULARLY_LIGAND_GATED_MONOATOMIC_ION_CHANNEL_ACTIVITY	SET	30	0.23154	0.0093858	0.16363	0.078543	0.790200691642651
GOBP_MITOCHONDRIAL_ELECTRON_TRANSPORT_NADH_TO_UBIQUINONE	SET	42	0.15927	0.0076364	0.11265	0.078719	0.790200691642651
GOMF_RNA_POLYMERASE_III_ACTIVITY	SET	10	0.35766	0.0083751	0.25298	0.078726	0.790200691642651
GOBP_NEGATIVE_REGULATION_OF_PROTEASOMAL_PROTEIN_CATABOLIC_PROCESS	SET	48	0.17084	0.0087556	0.12087	0.078771	0.790200691642651
GOBP_REGULATION_OF_GLIAL_CELL_PROLIFERATION	SET	36	0.20318	0.0090208	0.14376	0.078793	0.790200691642651
GOBP_PEPTIDE_ANTIGEN_ASSEMBLY_WITH_MHC_CLASS_II_PROTEIN_COMPLEX	SET	14	0.36437	0.010094	0.25797	0.078922	0.790734817658349
GOMF_SINGLE_STRANDED_RNA_BINDING	SET	77	0.12679	0.0082237	0.089839	0.079082	0.791578216682646
GOBP_DETECTION_OF_MECHANICAL_STIMULUS_INVOLVED_IN_SENSORY_PERCEPTION	SET	36	0.21871	0.0097103	0.15515	0.079329	0.792831747851003
GOBP_MITOCHONDRIAL_DEPOLARIZATION	SET	24	0.24664	0.0089437	0.17499	0.079363	0.792831747851003
GOBP_TONIC_SMOOTH_MUSCLE_CONTRACTION	SET	11	0.40843	0.010031	0.28993	0.079465	0.792831747851003
GOBP_INTERMEDIATE_FILAMENT_ORGANIZATION	SET	72	0.18412	0.011549	0.13073	0.079511	0.792831747851003
GOMF_CYSTEINE_TYPE_PEPTIDASE_ACTIVITY	SET	155	0.092955	0.0085354	0.066073	0.079744	0.793628376068376
GOBP_REGULATION_OF_HEPATOCYTE_PROLIFERATION	SET	16	0.26917	0.0079714	0.19146	0.07989	0.793628376068376
GOBP_INDUCTION_OF_POSITIVE_CHEMOTAXIS	SET	13	0.33509	0.0089457	0.23836	0.079902	0.793628376068376
GOCC_EARP_COMPLEX	SET	5	0.48472	0.0080272	0.34499	0.080012	0.793628376068376
GOBP_RUFFLE_ORGANIZATION	SET	57	0.14899	0.0083187	0.10604	0.080016	0.793628376068376
GOBP_PRENYLATION	SET	11	0.30211	0.0074196	0.21506	0.080047	0.793628376068376
GOBP_INTRINSIC_APOPTOTIC_SIGNALING_PATHWAY_IN_RESPONSE_TO_ENDOPLASMIC_RETICULUM_STRESS	SET	62	0.13567	0.0078992	0.096648	0.080205	0.794440417457305
GOBP_PROTEIN_ACYLATION	SET	86	0.11938	0.0081809	0.085114	0.080377	0.795002045454545
GOCC_NUCLEAR_RNA_EXPORT_FACTOR_COMPLEX	SET	2	0.69186	0.0072469	0.49335	0.080414	0.795002045454545
GOCC_ENDOPLASMIC_RETICULUM_QUALITY_CONTROL_COMPARTMENT	SET	15	0.26748	0.00767	0.19105	0.080762	0.795226939534884
GOCC_ALPHA_DNA_POLYMERASE_PRIMASE_COMPLEX	SET	3	0.4698	0.0060267	0.3356	0.080786	0.795226939534884
GOBP_SULFUR_AMINO_ACID_CATABOLIC_PROCESS	SET	10	0.37978	0.008893	0.27141	0.080873	0.795226939534884
GOBP_STEM_CELL_DEVELOPMENT	SET	86	0.13287	0.0091053	0.094978	0.08092	0.795226939534884
GOBP_EXOCYTIC_PROCESS	SET	77	0.13153	0.0085312	0.094041	0.08096	0.795226939534884
GOBP_CELL_PROLIFERATION_IN_MIDBRAIN	SET	8	0.37629	0.0078816	0.26936	0.081215	0.795226939534884
GOCC_CONDENSED_CHROMOSOME_CENTROMERIC_REGION	SET	177	0.084386	0.0082753	0.060418	0.081257	0.795226939534884
GOMF_TRNA_CYTIDINE_5_METHYLTRANSFERASE_ACTIVITY	SET	5	0.52766	0.0087382	0.37784	0.081286	0.795226939534884
GOBP_POSITIVE_REGULATION_OF_AXONOGENESIS	SET	71	0.13905	0.0086618	0.099582	0.081309	0.795226939534884
GOBP_NEGATIVE_REGULATION_OF_PHOSPHATASE_ACTIVITY	SET	20	0.23071	0.0076382	0.16524	0.081327	0.795226939534884
GOBP_AUTOSOME_GENOMIC_IMPRINTING	SET	5	0.48839	0.0080879	0.35002	0.081467	0.795226939534884
GOCC_PWP2P_CONTAINING_SUBCOMPLEX_OF_90S_PRERIBOSOME	SET	5	0.44069	0.0072979	0.31595	0.081544	0.795226939534884
GOBP_PROTEIN_INSERTION_INTO_MEMBRANE	SET	44	0.17256	0.008468	0.12373	0.08158	0.795226939534884
GOBP_HYDROGEN_PEROXIDE_METABOLIC_PROCESS	SET	50	0.16539	0.0086505	0.11863	0.081637	0.795226939534884
GOBP_TELENCEPHALON_GLIAL_CELL_MIGRATION	SET	25	0.25128	0.0092999	0.18032	0.081735	0.795226939534884
GOBP_PROTEIN_DEGLYCOSYLATION	SET	15	0.27446	0.0078703	0.19697	0.08176	0.795226939534884
GOBP_NEGATIVE_REGULATION_OF_PLASMA_MEMBRANE_BOUNDED_CELL_PROJECTION_ASSEMBLY	SET	35	0.20327	0.0088988	0.14589	0.081775	0.795226939534884
GOBP_PROTEIN_LOCALIZATION_TO_PHAGOPHORE_ASSEMBLY_SITE	SET	15	0.27492	0.0078835	0.19741	0.081875	0.795226939534884
GOBP_POSITIVE_REGULATION_OF_SODIUM_ION_TRANSMEMBRANE_TRANSPORT	SET	15	0.32335	0.0092723	0.2322	0.081884	0.795226939534884
GOBP_IMPORT_INTO_NUCLEUS	SET	164	0.091364	0.0086273	0.065642	0.081993	0.795545464684015
GOBP_RESPONSE_TO_COCAINE	SET	54	0.16995	0.0092365	0.12216	0.082095	0.795657773654917
GOMF_CHROMO_SHADOW_DOMAIN_BINDING	SET	5	0.49918	0.0082666	0.35893	0.082157	0.795657773654917
GOBP_POSITIVE_REGULATION_OF_COLLATERAL_SPROUTING	SET	9	0.37245	0.0082741	0.26803	0.082341	0.796338964285714
GOBP_MONOATOMIC_ION_TRANSPORT	SET	1162	0.036022	0.0088005	0.025931	0.082403	0.796338964285714
GOBP_AMINO_ACID_TRANSPORT	SET	149	0.099459	0.0089557	0.071628	0.082495	0.796338964285714
GOCC_TRANSLOCON_COMPLEX	SET	5	0.43567	0.0072149	0.31422	0.082801	0.796338964285714
GOBP_POSITIVE_REGULATION_OF_SPINDLE_ASSEMBLY	SET	8	0.39858	0.0083485	0.28758	0.082881	0.796338964285714
GOMF_SUPEROXIDE_GENERATING_NADPH_OXIDASE_ACTIVATOR_ACTIVITY	SET	7	0.40939	0.0080214	0.2954	0.082899	0.796338964285714
GOBP_UTERINE_SMOOTH_MUSCLE_CONTRACTION	SET	10	0.37008	0.0086661	0.26709	0.082944	0.796338964285714
GOBP_PRESYNAPSE_ORGANIZATION	SET	47	0.1736	0.008804	0.12533	0.083009	0.796338964285714
GOBP_POSITIVE_REGULATION_OF_NATURAL_KILLER_CELL_DIFFERENTIATION	SET	8	0.42749	0.0089541	0.30879	0.083124	0.796338964285714
GOMF_C_METHYLTRANSFERASE_ACTIVITY	SET	6	0.41783	0.0075795	0.30184	0.083149	0.796338964285714
GOBP_MDA_5_SIGNALING_PATHWAY	SET	11	0.29429	0.0072273	0.21266	0.083211	0.796338964285714
GOBP_VIRAL_TRANSLATIONAL_TERMINATION_REINITIATION	SET	5	0.40395	0.0066895	0.29191	0.08322	0.796338964285714
GOBP_PLACENTA_BLOOD_VESSEL_DEVELOPMENT	SET	30	0.21858	0.0088605	0.15799	0.083257	0.796338964285714
GOBP_PREASSEMBLY_OF_GPI_ANCHOR_IN_ER_MEMBRANE	SET	7	0.38485	0.0075405	0.27828	0.083344	0.796338964285714
GOBP_PEPTIDE_CATABOLIC_PROCESS	SET	19	0.27507	0.0088763	0.19913	0.083594	0.796338964285714
GOBP_CELLULAR_RESPONSE_TO_OXYGEN_RADICAL	SET	22	0.21872	0.0075941	0.15843	0.083719	0.796338964285714
GOBP_MHC_CLASS_II_BIOSYNTHETIC_PROCESS	SET	19	0.25058	0.0080862	0.18151	0.083721	0.796338964285714
GOBP_GENERATION_OF_NEURONS	SET	1432	0.032942	0.0088633	0.023876	0.083844	0.796338964285714
GOBP_BRANCHING_INVOLVED_IN_PROSTATE_GLAND_MORPHOGENESIS	SET	12	0.39145	0.010041	0.28375	0.083868	0.796338964285714
GOBP_MITOTIC_NUCLEAR_MEMBRANE_ORGANIZATION	SET	10	0.30323	0.0071007	0.22002	0.08408	0.796338964285714
GOBP_INTERNEURON_MIGRATION	SET	13	0.38339	0.010235	0.27829	0.084161	0.796338964285714
GOBP_VESICLE_FUSION_TO_PLASMA_MEMBRANE	SET	24	0.21975	0.0079687	0.15953	0.084186	0.796338964285714
GOBP_NEGATIVE_REGULATION_OF_TORC1_SIGNALING	SET	47	0.16235	0.0082335	0.1179	0.084267	0.796338964285714
GOMF_LBD_DOMAIN_BINDING	SET	6	0.59698	0.010829	0.43364	0.084314	0.796338964285714
GOBP_CATECHOLAMINE_UPTAKE_INVOLVED_IN_SYNAPTIC_TRANSMISSION	SET	12	0.31562	0.0080957	0.22933	0.084377	0.796338964285714
GOBP_POSITIVE_REGULATION_OF_GAMMA_DELTA_T_CELL_DIFFERENTIATION	SET	7	0.48783	0.0095582	0.35463	0.084479	0.796338964285714
GOBP_REGULATION_OF_RESPONSE_TO_REACTIVE_OXYGEN_SPECIES	SET	10	0.39317	0.0092066	0.28606	0.084668	0.796338964285714
GOMF_ANTIPORTER_ACTIVITY	SET	127	0.0992	0.0082516	0.072191	0.08471	0.796338964285714
GOBP_ACYLGLYCEROL_TRANSPORT	SET	7	0.38074	0.00746	0.27708	0.084713	0.796338964285714
GOBP_RESPONSE_TO_MACROPHAGE_COLONY_STIMULATING_FACTOR	SET	17	0.28857	0.0088089	0.21001	0.084715	0.796338964285714
GOMF_HISTONE_DEUBIQUITINASE_ACTIVITY	SET	7	0.38042	0.0074537	0.27705	0.084873	0.796338964285714
GOBP_INTERKINETIC_NUCLEAR_MIGRATION	SET	5	0.52481	0.0086909	0.38246	0.085011	0.796338964285714
GOMF_MOLECULAR_CARRIER_ACTIVITY	SET	93	0.11446	0.0081549	0.08348	0.085183	0.796338964285714
GOBP_SKELETAL_MUSCLE_ACETYLCHOLINE_GATED_CHANNEL_CLUSTERING	SET	13	0.27983	0.0074705	0.2041	0.085194	0.796338964285714
GOBP_NEGATIVE_REGULATION_OF_MONOCYTE_CHEMOTAXIS	SET	7	0.46757	0.0091613	0.34109	0.085226	0.796338964285714
GOBP_NEGATIVE_REGULATION_OF_VITAMIN_D_BIOSYNTHETIC_PROCESS	SET	5	0.48863	0.0080918	0.35647	0.08524	0.796338964285714
GOMF_MITOGEN_ACTIVATED_PROTEIN_KINASE_BINDING	SET	29	0.21785	0.0086825	0.15893	0.085242	0.796338964285714
GOBP_NEGATIVE_REGULATION_OF_SMOOTH_MUSCLE_CELL_APOPTOTIC_PROCESS	SET	13	0.35007	0.0093458	0.25544	0.085282	0.796338964285714
GOBP_NEURAL_CREST_CELL_DIFFERENTIATION	SET	92	0.12652	0.0089658	0.092341	0.085335	0.796338964285714
GOBP_RHYTHMIC_PROCESS	SET	290	0.067966	0.0085045	0.049612	0.08536	0.796338964285714
GOMF_NEUROTROPHIN_RECEPTOR_BINDING	SET	11	0.34118	0.0083791	0.24905	0.085364	0.796338964285714
GOBP_REGULATION_OF_LONG_CHAIN_FATTY_ACID_IMPORT_ACROSS_PLASMA_MEMBRANE	SET	6	0.41828	0.0075877	0.30542	0.085431	0.796338964285714
GOBP_REGULATION_OF_TYPE_B_PANCREATIC_CELL_PROLIFERATION	SET	12	0.35081	0.0089983	0.25643	0.085654	0.797199144385027
GOBP_INTERNAL_PROTEIN_AMINO_ACID_ACETYLATION	SET	10	0.30989	0.0072566	0.22654	0.085676	0.797199144385027
GOBP_POSITIVE_REGULATION_OF_CALCINEURIN_MEDIATED_SIGNALING	SET	20	0.26972	0.0089295	0.19731	0.085831	0.797930222617988
GOBP_CYTOPLASMIC_MICROTUBULE_ORGANIZATION	SET	59	0.14629	0.0083093	0.10714	0.086086	0.799544667258208
GOBP_REGULATION_OF_CELLULAR_COMPONENT_SIZE	SET	333	0.062651	0.0083905	0.045931	0.086288	0.799544667258208
GOMF_MONOATOMIC_CATION_TRANSMEMBRANE_TRANSPORTER_ACTIVITY	SET	609	0.047415	0.008521	0.034764	0.086305	0.799544667258208
GOBP_POSITIVE_REGULATION_OF_OSTEOCLAST_DIFFERENTIATION	SET	29	0.2204	0.0087842	0.1616	0.086311	0.799544667258208
GOMF_MHC_CLASS_IB_RECEPTOR_ACTIVITY	SET	8	0.41091	0.0086067	0.30145	0.086435	0.799983510638298
GOBP_ESTABLISHMENT_OF_PROTEIN_LOCALIZATION_TO_ENDOPLASMIC_RETICULUM	SET	39	0.1767	0.0081649	0.12973	0.086594	0.800587526501767
GOBP_REGULATION_OF_POSTSYNAPTIC_MEMBRANE_POTENTIAL	SET	140	0.10329	0.0090174	0.075864	0.08669	0.800587526501767
GOBP_MAST_CELL_PROLIFERATION	SET	7	0.4746	0.009299	0.34867	0.086736	0.800587526501767
GOBP_REGULATION_OF_L_GLUTAMATE_IMPORT_ACROSS_PLASMA_MEMBRANE	SET	8	0.41273	0.0086449	0.30331	0.086807	0.800587526501767
GOBP_CELL_CELL_SIGNALING	SET	1238	0.034329	0.0086377	0.025248	0.086976	0.800929763779528
GOCC_CATENIN_COMPLEX	SET	31	0.23621	0.0097333	0.17392	0.087209	0.800929763779528
GOBP_REGULATION_OF_SYNAPTIC_PLASTICITY	SET	197	0.078765	0.0081442	0.057999	0.087234	0.800929763779528
GOBP_NEGATIVE_REGULATION_OF_CGAS_STING_SIGNALING_PATHWAY	SET	12	0.30905	0.0079271	0.2276	0.087269	0.800929763779528
GOBP_PROTEIN_METHYLATION	SET	49	0.1491	0.0077205	0.10982	0.087281	0.800929763779528
GOBP_CELLULAR_RESPONSE_TO_FRUCTOSE_STIMULUS	SET	5	0.43006	0.0071218	0.31683	0.087342	0.800929763779528
GOBP_STARTLE_RESPONSE	SET	27	0.21924	0.0084318	0.16161	0.087466	0.800929763779528
GOBP_MONOCARBOXYLIC_ACID_TRANSPORT	SET	177	0.089879	0.0088139	0.066276	0.087538	0.800929763779528
GOMF_MONOCARBOXYLIC_ACID_BINDING	SET	85	0.13399	0.0091287	0.09886	0.087662	0.800929763779528
GOBP_PROPRIOCEPTION	SET	4	0.57194	0.0084718	0.422	0.08767	0.800929763779528
GOMF_NAD_DEPENDENT_PROTEIN_LYSINE_DEACETYLASE_ACTIVITY	SET	7	0.4339	0.0085016	0.32018	0.087688	0.800929763779528
GOBP_RETINAL_CONE_CELL_DEVELOPMENT	SET	11	0.38555	0.0094686	0.28464	0.087793	0.801187867132867
GOBP_CELLULAR_RESPONSE_TO_OXIDISED_LOW_DENSITY_LIPOPROTEIN_PARTICLE_STIMULUS	SET	12	0.31044	0.0079627	0.22986	0.08843	0.801731851851852
GOBP_POSITIVE_REGULATION_OF_SODIUM_ION_TRANSMEMBRANE_TRANSPORTER_ACTIVITY	SET	11	0.3662	0.0089934	0.2712	0.088475	0.801731851851852
GOBP_REGULATION_OF_PLASMA_CELL_DIFFERENTIATION	SET	6	0.39269	0.0071235	0.2914	0.088907	0.801731851851852
GOBP_PROTON_TRANSPORTING_V_TYPE_ATPASE_COMPLEX_ASSEMBLY	SET	7	0.39884	0.0078146	0.29606	0.088971	0.801731851851852
GOBP_RESPONSE_TO_PROGESTERONE	SET	44	0.16092	0.0078966	0.11947	0.089004	0.801731851851852
GOMF_HISTONE_ACETYLTRANSFERASE_BINDING	SET	23	0.25403	0.0090181	0.18864	0.089057	0.801731851851852
GOMF_ACETYLCHOLINE_RECEPTOR_INHIBITOR_ACTIVITY	SET	7	0.4577	0.0089679	0.33994	0.089091	0.801731851851852
GOBP_CELLULAR_OXIDANT_DETOXIFICATION	SET	93	0.11612	0.0082732	0.086243	0.089094	0.801731851851852
GOBP_IMMUNOLOGICAL_SYNAPSE_FORMATION	SET	16	0.2846	0.0084284	0.21138	0.089102	0.801731851851852
GOBP_ORGANIC_CATION_TRANSPORT	SET	110	0.11032	0.008544	0.081953	0.089146	0.801731851851852
GOBP_ACTIVATED_T_CELL_PROLIFERATION	SET	44	0.17096	0.0083894	0.12708	0.089278	0.801731851851852
GOMF_SUGAR_TRANSMEMBRANE_TRANSPORTER_ACTIVITY	SET	29	0.21946	0.0087469	0.16315	0.089296	0.801731851851852
GOBP_CEREBRAL_CORTEX_CELL_MIGRATION	SET	43	0.18618	0.0090322	0.13853	0.089487	0.801731851851852
GOBP_RECOGNITION_OF_APOPTOTIC_CELL	SET	7	0.47066	0.0092219	0.35031	0.089553	0.801731851851852
GOBP_POSITIVE_REGULATION_OF_INTRINSIC_APOPTOTIC_SIGNALING_PATHWAY_BY_P53_CLASS_MEDIATOR	SET	6	0.4749	0.0086149	0.35349	0.089569	0.801731851851852
GOCC_MITOTIC_SPINDLE_MIDZONE	SET	14	0.2951	0.0081754	0.21968	0.089589	0.801731851851852
GOBP_RESPONSE_TO_GLUCAGON	SET	21	0.24878	0.0084394	0.18519	0.089593	0.801731851851852
GOBP_AUTOPHAGY_OF_PEROXISOME	SET	15	0.29764	0.0085348	0.22179	0.089809	0.801731851851852
GOCC_COPII_COATED_ER_TO_GOLGI_TRANSPORT_VESICLE	SET	87	0.11278	0.0077734	0.084061	0.089856	0.801731851851852
GOCC_ATPASE_COMPLEX	SET	141	0.08676	0.0076013	0.064676	0.089895	0.801731851851852
GOBP_POSITIVE_REGULATION_OF_CENTRIOLE_REPLICATION	SET	9	0.31994	0.0071076	0.23856	0.089951	0.801731851851852
GOBP_REGULATION_OF_GOLGI_TO_PLASMA_MEMBRANE_PROTEIN_TRANSPORT	SET	9	0.36526	0.0081145	0.27253	0.09009	0.801731851851852
GOBP_POSITIVE_REGULATION_OF_GTPASE_ACTIVITY	SET	188	0.084457	0.0085331	0.063078	0.090307	0.801731851851852
GOBP_RESPONSE_TO_ALKALOID	SET	98	0.11561	0.008454	0.08635	0.090327	0.801731851851852
GOCC_RNA_POLYMERASE_III_COMPLEX	SET	18	0.23281	0.0073126	0.17395	0.090389	0.801731851851852
GOBP_CELLULAR_RESPONSE_TO_STRESS	SET	1737	0.027314	0.0080201	0.020419	0.090513	0.801731851851852
GOBP_PHOSPHAGEN_METABOLIC_PROCESS	SET	5	0.42931	0.0071094	0.32111	0.09063	0.801731851851852
GOBP_REGULATION_OF_GLUTAMATE_SECRETION	SET	19	0.26153	0.0084396	0.19565	0.090658	0.801731851851852
GOBP_CORTISOL_METABOLIC_PROCESS	SET	12	0.33177	0.0085099	0.24822	0.090691	0.801731851851852
GOMF_OXYSTEROL_BINDING	SET	16	0.302	0.0089436	0.22601	0.090748	0.801731851851852
GOMF_OXIDOREDUCTASE_ACTIVITY_ACTING_ON_THE_ALDEHYDE_OR_OXO_GROUP_OF_DONORS_DISULFIDE_AS_ACCEPTOR	SET	8	0.4525	0.0094779	0.33865	0.090754	0.801731851851852
GOBP_REGULATION_OF_TESTOSTERONE_BIOSYNTHETIC_PROCESS	SET	7	0.39424	0.0077244	0.29509	0.090784	0.801731851851852
GOCC_RNA_POLYMERASE_I_COMPLEX	SET	13	0.27743	0.0074066	0.20767	0.090796	0.801731851851852
GOBP_POSITIVE_REGULATION_OF_LEUKOCYTE_MIGRATION	SET	145	0.092133	0.0081848	0.068982	0.090845	0.801731851851852
GOMF_SODIUM_ION_TRANSMEMBRANE_TRANSPORTER_ACTIVITY	SET	156	0.095096	0.00876	0.07122	0.090906	0.801731851851852
GOMF_MALATE_DEHYDROGENASE_ACTIVITY	SET	8	0.42471	0.0088958	0.31814	0.090951	0.801731851851852
GOCC_PROTON_TRANSPORTING_TWO_SECTOR_ATPASE_COMPLEX_CATALYTIC_DOMAIN	SET	18	0.24824	0.0077973	0.18596	0.090952	0.801731851851852
GOBP_CONVERGENT_EXTENSION_INVOLVED_IN_AXIS_ELONGATION	SET	5	0.52366	0.0086719	0.39232	0.090986	0.801731851851852
GOBP_REGULATION_OF_GLUCONEOGENESIS	SET	49	0.1507	0.0078033	0.11299	0.091138	0.801731851851852
GOBP_AXONEMAL_CENTRAL_APPARATUS_ASSEMBLY	SET	6	0.37744	0.0068469	0.2832	0.091315	0.801731851851852
GOBP_VACUOLE_ORGANIZATION	SET	222	0.069272	0.0075983	0.052	0.091414	0.801731851851852
GOMF_RNA_METHYLTRANSFERASE_ACTIVITY	SET	61	0.1255	0.0072481	0.094298	0.09162	0.801731851851852
GOBP_TELOMERIC_LOOP_DISASSEMBLY	SET	9	0.33464	0.0074341	0.25156	0.091729	0.801731851851852
GOBP_REGULATION_OF_GTPASE_ACTIVITY	SET	251	0.073106	0.0085197	0.054988	0.09185	0.801731851851852
GOCC_TRANSPORT_VESICLE_MEMBRANE	SET	229	0.072961	0.0081266	0.054884	0.091872	0.801731851851852
GOBP_LYMPHATIC_ENDOTHELIAL_CELL_DIFFERENTIATION	SET	8	0.41754	0.0087455	0.31419	0.091941	0.801731851851852
GOCC_SEC61_TRANSLOCON_COMPLEX	SET	4	0.43919	0.0065055	0.33059	0.092012	0.801731851851852
GOMF_TRANSMEMBRANE_RECEPTOR_PROTEIN_PHOSPHATASE_ACTIVITY	SET	17	0.30889	0.009429	0.23252	0.092023	0.801731851851852
GOCC_NLRP3_INFLAMMASOME_COMPLEX	SET	7	0.39649	0.0077685	0.2986	0.092127	0.801731851851852
GOBP_REGULATION_OF_CARBOHYDRATE_BIOSYNTHETIC_PROCESS	SET	94	0.11416	0.0081772	0.085982	0.09214	0.801731851851852
GOBP_POSITIVE_REGULATION_OF_NF_KAPPAB_TRANSCRIPTION_FACTOR_ACTIVITY	SET	128	0.09449	0.0078905	0.071167	0.092142	0.801731851851852
GOBP_MACROPHAGE_APOPTOTIC_PROCESS	SET	13	0.27694	0.0073935	0.2086	0.092163	0.801731851851852
GOBP_DICARBOXYLIC_ACID_TRANSPORT	SET	100	0.11236	0.0082999	0.084701	0.092329	0.801731851851852
GOCC_CONDENSED_CHROMOSOME	SET	271	0.064794	0.0078417	0.048855	0.092387	0.801731851851852
GOBP_POSITIVE_REGULATION_OF_NEUROTRANSMITTER_TRANSPORT	SET	24	0.21971	0.0079675	0.16568	0.092402	0.801731851851852
GOBP_PHOSPHATIDYLSERINE_METABOLIC_PROCESS	SET	23	0.2242	0.0079593	0.16911	0.092457	0.801731851851852
GOBP_ANTIGEN_PROCESSING_AND_PRESENTATION_OF_PEPTIDE_ANTIGEN	SET	69	0.13898	0.0085348	0.10485	0.092518	0.801731851851852
GOBP_HOMEOSTATIC_PROCESS	SET	1635	0.02905	0.0083012	0.021917	0.09252	0.801731851851852
GOBP_PROTEIN_DEPALMITOYLATION	SET	8	0.45458	0.0095215	0.34309	0.092601	0.801731851851852
GOBP_REGULATION_OF_AMINO_ACID_TRANSMEMBRANE_TRANSPORT	SET	14	0.31396	0.0086978	0.23703	0.092673	0.801731851851852
GOBP_RESPONSE_TO_ISCHEMIA	SET	64	0.14797	0.0087527	0.11181	0.092853	0.801731851851852
GOBP_ICOSANOID_CATABOLIC_PROCESS	SET	9	0.31508	0.0069996	0.23816	0.092932	0.801731851851852
GOBP_POSITIVE_REGULATION_OF_VESICLE_TRANSPORT_ALONG_MICROTUBULE	SET	4	0.52223	0.0077355	0.39477	0.092948	0.801731851851852
GOBP_REGULATION_OF_FAT_CELL_DIFFERENTIATION	SET	129	0.10092	0.0084603	0.076299	0.092973	0.801731851851852
GOBP_POSITIVE_REGULATION_OF_CGMP_MEDIATED_SIGNALING	SET	5	0.46065	0.0076285	0.34831	0.093006	0.801731851851852
GOBP_URETER_MORPHOGENESIS	SET	7	0.41743	0.0081788	0.31575	0.093091	0.801731851851852
GOBP_PYRAMIDAL_NEURON_DIFFERENTIATION	SET	13	0.31448	0.0083957	0.2379	0.093103	0.801731851851852
GOBP_LIPID_DROPLET_ORGANIZATION	SET	35	0.17124	0.0074966	0.12957	0.093166	0.801731851851852
GOMF_MHC_PROTEIN_COMPLEX_BINDING	SET	35	0.19459	0.008519	0.14727	0.093196	0.801731851851852
GOBP_PHOSPHATIDYLGLYCEROL_ACYL_CHAIN_REMODELING	SET	9	0.38822	0.0086244	0.2939	0.093271	0.801731851851852
GOBP_TERPENOID_CATABOLIC_PROCESS	SET	8	0.4116	0.0086212	0.31165	0.093305	0.801731851851852
GOBP_POSITIVE_REGULATION_OF_PROTEIN_DEUBIQUITINATION	SET	5	0.45983	0.007615	0.34833	0.09341	0.801974013157895
GOBP_PROTON_MOTIVE_FORCE_DRIVEN_ATP_SYNTHESIS	SET	64	0.11827	0.0069958	0.089662	0.093586	0.802476590163934
GOBP_ANTERIOR_HEAD_DEVELOPMENT	SET	7	0.43748	0.0085718	0.33183	0.093693	0.802476590163934
GOBP_POSITIVE_REGULATION_OF_MHC_CLASS_II_BIOSYNTHETIC_PROCESS	SET	14	0.27567	0.007637	0.20916	0.09376	0.802476590163934
GOBP_MUCOSA_ASSOCIATED_LYMPHOID_TISSUE_DEVELOPMENT	SET	8	0.40542	0.0084918	0.30762	0.093776	0.802476590163934
GOMF_INOSITOL_TETRAKISPHOSPHATE_PHOSPHATASE_ACTIVITY	SET	6	0.49786	0.0090313	0.37805	0.093942	0.803238722358722
GOBP_PROTEIN_LOCALIZATION_TO_EARLY_ENDOSOME	SET	12	0.3213	0.0082413	0.24416	0.09411	0.803263896523848
GOCC_TIM23_MITOCHONDRIAL_IMPORT_INNER_MEMBRANE_TRANSLOCASE_COMPLEX	SET	13	0.25412	0.0067843	0.19318	0.09418	0.803263896523848
GOBP_INTERLEUKIN_12_PRODUCTION	SET	61	0.14485	0.0083654	0.11021	0.094389	0.803263896523848
GOBP_ESTABLISHMENT_OF_PLANAR_POLARITY_OF_EMBRYONIC_EPITHELIUM	SET	15	0.27309	0.0078309	0.20781	0.094412	0.803263896523848
GOBP_PEPTIDYL_SERINE_AUTOPHOSPHORYLATION	SET	8	0.44426	0.0093053	0.33817	0.094479	0.803263896523848
GOBP_INTEGRATED_STRESS_RESPONSE_SIGNALING	SET	48	0.15943	0.0081705	0.12139	0.094543	0.803263896523848
GOBP_PROTEIN_IMPORT_INTO_PEROXISOME_MATRIX_SUBSTRATE_RELEASE	SET	5	0.52103	0.0086284	0.39681	0.094591	0.803263896523848
GOMF_PHOSPHOLIPASE_ACTIVITY	SET	107	0.10251	0.0078308	0.078101	0.094687	0.803263896523848
GOBP_MONOCYTE_AGGREGATION	SET	5	0.57325	0.0094932	0.43691	0.094758	0.803263896523848
GOBP_NEGATIVE_REGULATION_OF_ENDOPLASMIC_RETICULUM_STRESS_INDUCED_INTRINSIC_APOPTOTIC_SIGNALING_PATHWAY	SET	19	0.22442	0.0072419	0.17117	0.094921	0.803263896523848
GOMF_MUTSALPHA_COMPLEX_BINDING	SET	7	0.37043	0.007258	0.28256	0.094939	0.803263896523848
GOBP_REGULATION_OF_INSULIN_RECEPTOR_SIGNALING_PATHWAY	SET	67	0.12884	0.0077972	0.098317	0.095026	0.803263896523848
GOMF_HSP90_PROTEIN_BINDING	SET	40	0.15876	0.0074291	0.12118	0.095085	0.803263896523848
GOBP_PROTEIN_TO_MEMBRANE_DOCKING	SET	5	0.50262	0.0083235	0.3838	0.095174	0.803263896523848
GOBP_FRUCTOSE_2_6_BISPHOSPHATE_METABOLIC_PROCESS	SET	4	0.43694	0.0064722	0.33365	0.095176	0.803263896523848
GOMF_FRUCTOSE_2_6_BISPHOSPHATE_2_PHOSPHATASE_ACTIVITY	SET	4	0.43694	0.0064722	0.33365	0.095176	0.803263896523848
GOBP_POSITIVE_REGULATION_OF_INTERLEUKIN_1_ALPHA_PRODUCTION	SET	6	0.54597	0.0099041	0.41719	0.095328	0.803593510895884
GOBP_REGULATION_OF_DENDRITE_EXTENSION	SET	25	0.24809	0.0091819	0.18961	0.095369	0.803593510895884
GOMF_RNA_CAP_BINDING	SET	19	0.24187	0.0078049	0.18498	0.095521	0.804204430278884
GOBP_SYNAPTIC_VESICLE_MATURATION	SET	21	0.22436	0.0076112	0.17176	0.09574	0.804204430278884
GOBP_MORPHOGENESIS_OF_AN_EPITHELIAL_SHEET	SET	64	0.13003	0.0076913	0.09955	0.09576	0.804204430278884
GOCC_ENDOPEPTIDASE_COMPLEX	SET	85	0.10909	0.0074326	0.083565	0.095869	0.804204430278884
GOBP_REGULATION_OF_LONG_TERM_NEURONAL_SYNAPTIC_PLASTICITY	SET	23	0.21717	0.0077096	0.16639	0.095927	0.804204430278884
GOBP_REGULATION_OF_PROTON_TRANSPORT	SET	16	0.25027	0.0074118	0.19212	0.09635	0.804204430278884
GOBP_PEPTIDYL_LYSINE_TRIMETHYLATION	SET	9	0.33814	0.007512	0.25957	0.096351	0.804204430278884
GOMF_ATP_ACTIVATED_INWARD_RECTIFIER_POTASSIUM_CHANNEL_ACTIVITY	SET	6	0.4943	0.0089668	0.37945	0.096353	0.804204430278884
GOCC_BRUSH_BORDER_MEMBRANE	SET	57	0.15048	0.0084018	0.11554	0.096392	0.804204430278884
GOBP_ESTABLISHMENT_OF_PLANAR_POLARITY_INVOLVED_IN_NEURAL_TUBE_CLOSURE	SET	12	0.29006	0.0074401	0.22271	0.096397	0.804204430278884
GOBP_PROGESTERONE_BIOSYNTHETIC_PROCESS	SET	6	0.38084	0.0069086	0.29245	0.096423	0.804204430278884
GOBP_L_GLUTAMATE_IMPORT_ACROSS_PLASMA_MEMBRANE	SET	17	0.28855	0.0088083	0.22159	0.096432	0.804204430278884
GOMF_SERINE_TYPE_CARBOXYPEPTIDASE_ACTIVITY	SET	5	0.43038	0.0071272	0.33052	0.096447	0.804204430278884
GOBP_NEGATIVE_REGULATION_OF_RESPONSE_TO_TYPE_II_INTERFERON	SET	7	0.35306	0.0069177	0.27129	0.096561	0.804204430278884
GOBP_ENTERIC_NERVOUS_SYSTEM_DEVELOPMENT	SET	12	0.31483	0.0080755	0.24195	0.096599	0.804204430278884
GOMF_HISTONE_H4K5_ACETYLTRANSFERASE_ACTIVITY	SET	11	0.3127	0.0076794	0.24039	0.096674	0.804204430278884
GOBP_PRIMITIVE_ERYTHROCYTE_DIFFERENTIATION	SET	4	0.59186	0.0087669	0.45537	0.096853	0.804627494033413
GOBP_REGULATION_OF_ODONTOGENESIS_OF_DENTIN_CONTAINING_TOOTH	SET	12	0.36075	0.0092534	0.27759	0.096879	0.804627494033413
GOCC_NURF_COMPLEX	SET	5	0.47455	0.0078587	0.36589	0.097329	0.805703509047994
GOBP_SIGNAL_TRANSDUCTION_BY_P53_CLASS_MEDIATOR	SET	167	0.080633	0.0076828	0.06224	0.097577	0.805703509047994
GOBP_POSITIVE_REGULATION_OF_ACTIN_NUCLEATION	SET	14	0.28786	0.0079748	0.22219	0.097578	0.805703509047994
GOBP_AMEBOIDAL_TYPE_CELL_MIGRATION	SET	415	0.054504	0.00813	0.042077	0.09761	0.805703509047994
GOBP_FOREBRAIN_DEVELOPMENT	SET	391	0.057398	0.0083161	0.044317	0.097638	0.805703509047994
GOBP_PROTEIN_DELIPIDATION	SET	4	0.55144	0.0081681	0.42586	0.097692	0.805703509047994
GOCC_GARP_COMPLEX	SET	5	0.44351	0.0073446	0.3427	0.097815	0.805703509047994
GOBP_REGULATION_OF_MITOTIC_CYTOKINESIS	SET	16	0.24975	0.0073965	0.193	0.097829	0.805703509047994
GOMF_COPPER_CHAPERONE_ACTIVITY	SET	6	0.34836	0.0063193	0.26927	0.097896	0.805703509047994
GOBP_FOREBRAIN_NEURON_DEVELOPMENT	SET	23	0.25889	0.0091909	0.20017	0.097947	0.805703509047994
GOBP_RELEASE_OF_CYTOCHROME_C_FROM_MITOCHONDRIA	SET	55	0.14276	0.0078303	0.11038	0.097959	0.805703509047994
GOBP_REGULATION_OF_FEMALE_GONAD_DEVELOPMENT	SET	7	0.44146	0.0086497	0.34138	0.097983	0.805703509047994
GOMF_PHOSPHATIDYLINOSITOL_PHOSPHATE_BINDING	SET	170	0.083836	0.0080586	0.064851	0.098057	0.805703509047994
GOMF_INOSITOL_1_4_5_TRISPHOSPHATE_5_PHOSPHATASE_ACTIVITY	SET	5	0.56113	0.0092924	0.43412	0.098089	0.805703509047994
GOBP_POSITIVE_REGULATION_OF_AMINE_TRANSPORT	SET	39	0.17785	0.0082179	0.13776	0.098353	0.807236886792453
GOBP_REGULATION_OF_MITOCHONDRIAL_OUTER_MEMBRANE_PERMEABILIZATION_INVOLVED_IN_APOPTOTIC_SIGNALING_PATHWAY	SET	20	0.22386	0.0074113	0.17362	0.098642	0.807392523364486
GOBP_CELL_PROJECTION_ORGANIZATION	SET	1559	0.028703	0.0080275	0.022262	0.098647	0.807392523364486
GOBP_NUCLEAR_ENVELOPE_ORGANIZATION	SET	55	0.1272	0.0069767	0.098674	0.098692	0.807392523364486
GOBP_ATRIAL_SEPTUM_MORPHOGENESIS	SET	15	0.32402	0.0092914	0.25144	0.098772	0.807392523364486
GOMF_CYCLIC_NUCLEOTIDE_BINDING	SET	37	0.17571	0.0079087	0.13639	0.098832	0.807392523364486
GOBP_BASE_EXCISION_REPAIR_GAP_FILLING	SET	14	0.26127	0.0072381	0.20292	0.098963	0.807392523364486
GOBP_L_ALPHA_AMINO_ACID_TRANSMEMBRANE_TRANSPORT	SET	67	0.13635	0.0082518	0.10593	0.099023	0.807392523364486
GOBP_POSITIVE_REGULATION_OF_RNA_METABOLIC_PROCESS	SET	1739	0.026598	0.0078139	0.02067	0.099089	0.807392523364486
GOBP_URONIC_ACID_METABOLIC_PROCESS	SET	25	0.30155	0.01116	0.23442	0.099173	0.807392523364486
GOBP_LONG_CHAIN_FATTY_ACID_TRANSPORT	SET	66	0.13304	0.0079913	0.10346	0.099251	0.807392523364486
GOBP_MOLTING_CYCLE	SET	116	0.10545	0.0083858	0.082025	0.099294	0.807392523364486
GOMF_CALCIUM_DEPENDENT_PROTEIN_BINDING	SET	76	0.13545	0.0087282	0.10536	0.0993	0.807392523364486
GOBP_CARBOHYDRATE_DERIVATIVE_BIOSYNTHETIC_PROCESS	SET	617	0.042679	0.0077183	0.033228	0.099506	0.808437852140078
GOBP_REGULATION_OF_INTRINSIC_APOPTOTIC_SIGNALING_PATHWAY_IN_RESPONSE_TO_DNA_DAMAGE	SET	37	0.17219	0.0077502	0.13428	0.09987	0.809930178432894
GOMF_STRUCTURAL_CONSTITUENT_OF_SKIN_EPIDERMIS	SET	37	0.22129	0.0099603	0.17261	0.099928	0.809930178432894
GOBP_POSITIVE_REGULATION_OF_LEUKOCYTE_DEGRANULATION	SET	22	0.21004	0.0072927	0.16389	0.1	0.809930178432894
GOMF_HISTONE_H4K12_ACETYLTRANSFERASE_ACTIVITY	SET	12	0.2795	0.0071693	0.21809	0.1	0.809930178432894
GOMF_ALPHA_ADRENERGIC_RECEPTOR_ACTIVITY	SET	6	0.45703	0.0082906	0.35766	0.10067	0.812347826086957
GOMF_NEUROTROPHIN_RECEPTOR_ACTIVITY	SET	5	0.547	0.0090585	0.42812	0.10069	0.812347826086957
GOBP_CELL_PROLIFERATION_IN_FOREBRAIN	SET	25	0.21905	0.0081069	0.17147	0.10072	0.812347826086957
GOBP_REGULATION_OF_PROTEIN_EXPORT_FROM_NUCLEUS	SET	34	0.18314	0.0079024	0.14346	0.10088	0.812347826086957
GOCC_CHITOSOME	SET	20	0.24924	0.0082515	0.19529	0.10094	0.812347826086957
GOBP_RESPONSE_TO_HYDROSTATIC_PRESSURE	SET	7	0.41566	0.0081441	0.32585	0.10105	0.812347826086957
GOCC_ISWI_TYPE_COMPLEX	SET	12	0.27569	0.0070715	0.21614	0.10108	0.812347826086957
GOCC_ER_MEMBRANE_INSERTION_COMPLEX	SET	12	0.30693	0.0078727	0.24073	0.10117	0.812347826086957
GOBP_PEPTIDYL_SERINE_MODIFICATION	SET	267	0.065978	0.0079267	0.051796	0.10137	0.812347826086957
GOBP_INNER_EAR_RECEPTOR_CELL_STEREOCILIUM_ORGANIZATION	SET	35	0.18231	0.0079812	0.14333	0.1017	0.812347826086957
GOBP_REGULATION_OF_MONOCYTE_CHEMOTAXIS	SET	27	0.2039	0.0078419	0.16035	0.10177	0.812347826086957
GOBP_POSITIVE_REGULATION_OF_PHOSPHATASE_ACTIVITY	SET	25	0.21617	0.0080005	0.17001	0.10178	0.812347826086957
GOBP_NEURAL_TUBE_DEVELOPMENT	SET	156	0.086731	0.0079893	0.068215	0.1018	0.812347826086957
GOBP_SENSORY_PERCEPTION_OF_MECHANICAL_STIMULUS	SET	180	0.083016	0.0082089	0.065307	0.10184	0.812347826086957
GOBP_RESPONSE_TO_ERYTHROPOIETIN	SET	7	0.45536	0.0089221	0.35827	0.10187	0.812347826086957
GOBP_MAINTENANCE_OF_SYNAPSE_STRUCTURE	SET	24	0.22851	0.0082865	0.17988	0.10198	0.812347826086957
GOBP_REGULATION_OF_PROTEIN_TARGETING_TO_MEMBRANE	SET	33	0.18454	0.0078449	0.14527	0.102	0.812347826086957
GOMF_NF_KAPPAB_BINDING	SET	28	0.19295	0.0075565	0.15191	0.10202	0.812347826086957
GOBP_SKELETAL_MUSCLE_SATELLITE_CELL_MAINTENANCE_INVOLVED_IN_SKELETAL_MUSCLE_REGENERATION	SET	5	0.56783	0.0094034	0.44734	0.10217	0.812347826086957
GOBP_DETECTION_OF_LIPOPOLYSACCHARIDE	SET	5	0.47984	0.0079463	0.3781	0.10222	0.812347826086957
GOBP_WALKING_BEHAVIOR	SET	34	0.18197	0.0078518	0.14343	0.10228	0.812347826086957
GOBP_REGULATION_OF_CELL_GROWTH	SET	377	0.055447	0.0078914	0.043726	0.1024	0.812347826086957
GOBP_EMBRYONIC_PLACENTA_DEVELOPMENT	SET	85	0.12554	0.0085529	0.099016	0.10243	0.812347826086957
GOBP_LABYRINTHINE_LAYER_BLOOD_VESSEL_DEVELOPMENT	SET	19	0.25664	0.0082817	0.20246	0.10247	0.812347826086957
GOBP_ENERGY_DERIVATION_BY_OXIDATION_OF_ORGANIC_COMPOUNDS	SET	305	0.058351	0.0074847	0.046046	0.10255	0.812347826086957
GOBP_STEM_CELL_FATE_SPECIFICATION	SET	6	0.49003	0.0088893	0.3868	0.10261	0.812347826086957
GOBP_URETER_DEVELOPMENT	SET	18	0.27031	0.0084904	0.21345	0.10269	0.812347826086957
GOBP_REGULATION_OF_MITOCHONDRIAL_ATP_SYNTHESIS_COUPLED_ELECTRON_TRANSPORT	SET	6	0.43408	0.0078744	0.34283	0.10274	0.812347826086957
GOMF_HEAT_SHOCK_PROTEIN_BINDING	SET	125	0.09244	0.0076289	0.073023	0.10278	0.812347826086957
GOCC_TRICARBOXYLIC_ACID_CYCLE_HETEROMERIC_ENZYME_COMPLEX	SET	18	0.24314	0.0076368	0.19209	0.10281	0.812347826086957
GOBP_SECONDARY_METABOLIC_PROCESS	SET	55	0.15251	0.0083651	0.1206	0.103	0.812347826086957
GOBP_REGULATION_OF_DEFENSE_RESPONSE_TO_FUNGUS	SET	5	0.46548	0.0077085	0.3681	0.10302	0.812347826086957
GOBP_STEM_CELL_DIFFERENTIATION	SET	239	0.071165	0.0080955	0.056297	0.1031	0.812347826086957
GOBP_PURINE_NUCLEOSIDE_MONOPHOSPHATE_METABOLIC_PROCESS	SET	40	0.16749	0.0078378	0.13258	0.10325	0.812347826086957
GOBP_NEGATIVE_REGULATION_OF_LIPID_BIOSYNTHETIC_PROCESS	SET	55	0.14279	0.007832	0.1131	0.10339	0.812347826086957
GOCC_LATERAL_PLASMA_MEMBRANE	SET	65	0.1363	0.008125	0.10799	0.10345	0.812347826086957
GOCC_P_BODY	SET	99	0.10567	0.0077663	0.083723	0.10347	0.812347826086957
GOBP_REGULATION_OF_CELLULAR_RESPONSE_TO_HEAT	SET	16	0.25999	0.0076997	0.20601	0.10348	0.812347826086957
GOBP_GLIAL_CELL_DEVELOPMENT	SET	127	0.095639	0.0079554	0.075786	0.10349	0.812347826086957
GOBP_PROTEIN_DNA_COMPLEX_ASSEMBLY	SET	198	0.076604	0.0079407	0.060718	0.10355	0.812347826086957
GOMF_RNA_POLYMERASE_II_CORE_PROMOTER_SEQUENCE_SPECIFIC_DNA_BINDING	SET	19	0.26023	0.0083974	0.20628	0.10357	0.812347826086957
GOMF_BETA_2_MICROGLOBULIN_BINDING	SET	8	0.3928	0.0082273	0.31141	0.1036	0.812347826086957
GOBP_GLUCOSE_CATABOLIC_PROCESS	SET	24	0.19979	0.0072448	0.15844	0.10368	0.812347826086957
GOMF_PROTEIN_SERINE_THREONINE_KINASE_ACTIVITY	SET	405	0.052268	0.0077042	0.041465	0.10375	0.812347826086957
GOBP_PROTEIN_LOCALIZATION_TO_CHROMATIN	SET	57	0.13686	0.0076416	0.1086	0.1038	0.812347826086957
GOBP_INORGANIC_ANION_TRANSMEMBRANE_TRANSPORT	SET	122	0.098222	0.0080089	0.078037	0.10408	0.813233308550186
GOCC_MRNA_EDITING_COMPLEX	SET	6	0.39065	0.0070865	0.31046	0.10416	0.813233308550186
GOBP_MITOCHONDRION_ENDOPLASMIC_RETICULUM_MEMBRANE_TETHERING	SET	7	0.43628	0.0085482	0.34696	0.1043	0.813233308550186
GOBP_REGULATION_OF_CANONICAL_WNT_SIGNALING_PATHWAY	SET	241	0.070335	0.008034	0.055967	0.10444	0.813233308550186
GOBP_BRANCHIOMOTOR_NEURON_AXON_GUIDANCE	SET	6	0.42714	0.0077484	0.34001	0.10453	0.813233308550186
GOBP_EMBRYONIC_EYE_MORPHOGENESIS	SET	34	0.19748	0.0085213	0.15724	0.10458	0.813233308550186
GOBP_RESPONSE_TO_REDOX_STATE	SET	14	0.27073	0.0075002	0.21556	0.10458	0.813233308550186
GOBP_POSITIVE_REGULATION_OF_DOPAMINE_SECRETION	SET	6	0.44783	0.0081237	0.35662	0.10461	0.813233308550186
GOMF_HISTONE_H3K14_ACETYLTRANSFERASE_ACTIVITY	SET	9	0.35369	0.0078574	0.28166	0.10462	0.813233308550186
GOBP_CELLULAR_RESPONSE_TO_CALCIUM_ION	SET	71	0.13109	0.008166	0.10445	0.10472	0.813233308550186
GOBP_REGULATION_OF_PHOSPHOLIPASE_C_ACTIVATING_G_PROTEIN_COUPLED_RECEPTOR_SIGNALING_PATHWAY	SET	5	0.49131	0.0081363	0.39152	0.10477	0.813233308550186
GOBP_FOREBRAIN_GENERATION_OF_NEURONS	SET	52	0.15158	0.0080845	0.12086	0.10491	0.81371500742942
GOBP_LEUKOTRIENE_BIOSYNTHETIC_PROCESS	SET	17	0.27581	0.0084193	0.22002	0.10501	0.813726039387308
GOBP_SMOOTHENED_SIGNALING_PATHWAY_INVOLVED_IN_DORSAL_VENTRAL_NEURAL_TUBE_PATTERNING	SET	5	0.49043	0.0081217	0.39138	0.1051	0.813726039387308
GOBP_POSITIVE_REGULATION_OF_SYNAPTIC_TRANSMISSION_CHOLINERGIC	SET	6	0.41263	0.0074853	0.32944	0.1052	0.813726039387308
GOBP_REGULATION_OF_DENDRITIC_SPINE_MAINTENANCE	SET	12	0.34886	0.0089484	0.27869	0.10533	0.813726039387308
GOBP_AMINO_ACID_ACTIVATION	SET	45	0.13626	0.0067621	0.10892	0.10547	0.813726039387308
GOBP_REGULATION_OF_CELLULAR_RESPONSE_TO_INSULIN_STIMULUS	SET	73	0.11869	0.0074965	0.094875	0.10547	0.813726039387308
GOCC_NEURON_PROJECTION	SET	1261	0.031222	0.007923	0.024963	0.10552	0.813726039387308
GOMF_STRUCTURAL_CONSTITUENT_OF_RIBOSOME	SET	151	0.079164	0.0071755	0.063318	0.10561	0.813726039387308
GOBP_ATP_METABOLIC_PROCESS	SET	203	0.067528	0.0070867	0.054046	0.10575	0.813726039387308
GOBP_PH_REDUCTION	SET	6	0.4573	0.0082956	0.36601	0.10576	0.813726039387308
GOMF_STRUCTURAL_CONSTITUENT_OF_SYNAPSE	SET	25	0.21408	0.0079231	0.17136	0.10578	0.813726039387308
GOBP_CELLULAR_RESPONSE_TO_MACROPHAGE_COLONY_STIMULATING_FACTOR_STIMULUS	SET	13	0.29528	0.007883	0.23656	0.10598	0.813726039387308
GOBP_REGULATION_OF_LIPID_METABOLIC_PROCESS	SET	297	0.061717	0.0078137	0.049448	0.106	0.813726039387308
GOBP_PROTEIN_K48_LINKED_DEUBIQUITINATION	SET	25	0.19001	0.0070323	0.15234	0.10615	0.813726039387308
GOBP_REGULATION_OF_GRANULOCYTE_CHEMOTAXIS	SET	49	0.14797	0.0076618	0.11864	0.10618	0.813726039387308
GOBP_VASCULAR_ENDOTHELIAL_CELL_PROLIFERATION	SET	25	0.19247	0.0071233	0.15446	0.10638	0.813726039387308
GOMF_DEACETYLASE_ACTIVITY	SET	36	0.16022	0.0071136	0.12861	0.10643	0.813726039387308
GOMF_PHOSPHATIDYLINOSITOL_4_5_BISPHOSPHATE_BINDING	SET	80	0.11834	0.0078227	0.09507	0.10662	0.813726039387308
GOBP_POSITIVE_REGULATION_OF_NUCLEAR_CELL_CYCLE_DNA_REPLICATION	SET	6	0.36108	0.0065501	0.29011	0.10664	0.813726039387308
GOMF_NEUROTROPHIN_TRK_RECEPTOR_BINDING	SET	6	0.38775	0.0070339	0.31163	0.10671	0.813726039387308
GOBP_REGULATION_OF_LIPOPROTEIN_PARTICLE_CLEARANCE	SET	21	0.22713	0.007705	0.18258	0.10676	0.813726039387308
GOBP_POSITIVE_REGULATION_OF_PROTEASOMAL_PROTEIN_CATABOLIC_PROCESS	SET	102	0.097347	0.0072618	0.078267	0.1068	0.813726039387308
GOMF_SUMO_LIGASE_ACTIVITY	SET	13	0.33175	0.0088567	0.26679	0.10685	0.813726039387308
GOBP_CELL_PROLIFERATION_INVOLVED_IN_METANEPHROS_DEVELOPMENT	SET	9	0.40654	0.0090314	0.32694	0.10686	0.813726039387308
GOCC_OXIDOREDUCTASE_COMPLEX	SET	105	0.090467	0.0068466	0.072754	0.10686	0.813726039387308
GOCC_MHC_CLASS_II_PROTEIN_COMPLEX	SET	15	0.30716	0.0088079	0.24733	0.10715	0.815339650145773
GOBP_POSITIVE_REGULATION_OF_GLYCOPROTEIN_METABOLIC_PROCESS	SET	24	0.20445	0.007414	0.1648	0.10739	0.816570721048798
GOBP_THYMIC_T_CELL_SELECTION	SET	24	0.22046	0.0079946	0.17794	0.10769	0.817736727272727
GOBP_NEGATIVE_REGULATION_OF_RECEPTOR_SIGNALING_PATHWAY_VIA_STAT	SET	23	0.23016	0.0081709	0.18578	0.1077	0.817736727272727
GOMF_IGE_BINDING	SET	5	0.38487	0.0063736	0.31123	0.10812	0.820329069767442
GOBP_GPI_ANCHOR_METABOLIC_PROCESS	SET	31	0.16264	0.0067015	0.13157	0.10822	0.820491503267974
GOBP_VESICLE_TARGETING_ROUGH_ER_TO_CIS_GOLGI	SET	24	0.18606	0.006747	0.1508	0.10865	0.822291540130152
GOBP_REGULATION_OF_DNA_DIRECTED_DNA_POLYMERASE_ACTIVITY	SET	9	0.29011	0.006445	0.23519	0.1087	0.822291540130152
GOBP_LUNG_LOBE_DEVELOPMENT	SET	7	0.46254	0.0090626	0.37525	0.10887	0.822291540130152
GOMF_STRUCTURAL_CONSTITUENT_OF_POSTSYNAPTIC_ACTIN_CYTOSKELETON	SET	9	0.34883	0.0077494	0.28302	0.10888	0.822291540130152
GOBP_GALACTOSE_METABOLIC_PROCESS	SET	9	0.35632	0.0079159	0.28911	0.10889	0.822291540130152
GOMF_MAP_KINASE_KINASE_ACTIVITY	SET	15	0.29386	0.0084266	0.23847	0.10893	0.822291540130152
GOMF_CAMP_DEPENDENT_PROTEIN_KINASE_REGULATOR_ACTIVITY	SET	12	0.32265	0.008276	0.26209	0.10916	0.823139350180505
GOBP_CRD_MEDIATED_MRNA_STABILIZATION	SET	11	0.28435	0.0069833	0.23102	0.1092	0.823139350180505
GOCC_PROTON_TRANSPORTING_TWO_SECTOR_ATPASE_COMPLEX	SET	46	0.13314	0.0066799	0.10828	0.10944	0.823326180257511
GOBP_CATECHOLAMINE_UPTAKE	SET	18	0.24093	0.0075676	0.19597	0.10946	0.823326180257511
GOBP_ZYMOGEN_INHIBITION	SET	7	0.412	0.0080724	0.33528	0.10958	0.823326180257511
GOBP_REGULATION_OF_VACUOLE_ORGANIZATION	SET	55	0.13051	0.0071583	0.10622	0.1096	0.823326180257511
GOMF_ZINC_ION_TRANSMEMBRANE_TRANSPORTER_ACTIVITY	SET	24	0.18418	0.0066789	0.15016	0.11	0.823326180257511
GOCC_SMALL_RIBOSOMAL_SUBUNIT	SET	68	0.11652	0.007104	0.095002	0.11001	0.823326180257511
GOBP_GAP_JUNCTION_MEDIATED_INTERCELLULAR_TRANSPORT	SET	6	0.49579	0.0089939	0.40425	0.11002	0.823326180257511
GOBP_POSITIVE_REGULATION_OF_SKELETAL_MUSCLE_CELL_DIFFERENTIATION	SET	8	0.38263	0.0080144	0.31198	0.11002	0.823326180257511
GOBP_REGULATION_OF_MACROPHAGE_APOPTOTIC_PROCESS	SET	10	0.29701	0.006955	0.2422	0.11004	0.823326180257511
GOMF_P53_BINDING	SET	65	0.12666	0.0075505	0.10332	0.11011	0.823326180257511
GOCC_ENDOSOME_LUMEN	SET	39	0.16604	0.0076723	0.13544	0.11013	0.823326180257511
GOBP_POSITIVE_REGULATION_OF_EPITHELIAL_CELL_PROLIFERATION	SET	194	0.075156	0.0077123	0.061328	0.11021	0.823326180257511
GOBP_HEMATOPOIETIC_STEM_CELL_DIFFERENTIATION	SET	36	0.17173	0.0076247	0.14016	0.11025	0.823326180257511
GOBP_REGULATION_OF_LIGASE_ACTIVITY	SET	7	0.32821	0.0064308	0.26807	0.11041	0.82393166547534
GOBP_APOPTOTIC_SIGNALING_PATHWAY	SET	579	0.042952	0.0075328	0.035116	0.11064	0.824916488222698
GOBP_RESPONSE_TO_PAIN	SET	36	0.17574	0.0078027	0.14371	0.1107	0.824916488222698
GOCC_HAUS_COMPLEX	SET	7	0.35611	0.0069774	0.2915	0.11093	0.826040798858773
GOBP_REGULATION_OF_PROTEIN_LOCALIZATION_TO_SYNAPSE	SET	18	0.26816	0.0084227	0.21963	0.11106	0.826419387027798
GOBP_NEGATIVE_REGULATION_OF_G_PROTEIN_COUPLED_RECEPTOR_SIGNALING_PATHWAY	SET	58	0.14991	0.0084429	0.12287	0.11124	0.827100640569395
GOCC_PROTEIN_DNA_COMPLEX	SET	1352	0.028967	0.0075909	0.023751	0.11131	0.827100640569395
GOBP_POSITIVE_REGULATION_OF_SYNAPTIC_TRANSMISSION_GLUTAMATERGIC	SET	33	0.18857	0.0080164	0.15478	0.11156	0.82824
GOBP_NEUROFILAMENT_CYTOSKELETON_ORGANIZATION	SET	10	0.33931	0.0079455	0.27877	0.11178	0.82824
GOCC_SYNAPTIC_VESICLE_MEMBRANE	SET	129	0.089496	0.0075024	0.073549	0.11185	0.82824
GOBP_HYDROGEN_SULFIDE_METABOLIC_PROCESS	SET	5	0.43887	0.0072679	0.3607	0.11186	0.82824
GOBP_SMOOTH_MUSCLE_CONTRACTION	SET	105	0.10661	0.008068	0.087615	0.11186	0.82824
GOBP_LYMPHOCYTE_MIGRATION	SET	102	0.1021	0.0076164	0.083941	0.11194	0.828244932671864
GOBP_POSITIVE_REGULATION_OF_EPITHELIAL_TUBE_FORMATION	SET	8	0.37773	0.0079117	0.31071	0.11206	0.828545609065156
GOBP_REGULATION_OF_PEPTIDYL_THREONINE_PHOSPHORYLATION	SET	40	0.1705	0.0079785	0.1403	0.11214	0.828550318471338
GOCC_APICAL_DENDRITE	SET	16	0.25412	0.0075257	0.20917	0.11222	0.828555021216407
GOBP_REGULATION_OF_CHEMOTAXIS	SET	198	0.073588	0.007628	0.060682	0.11263	0.830994487632509
GOBP_PHASIC_SMOOTH_MUSCLE_CONTRACTION	SET	24	0.23237	0.0084266	0.19185	0.11291	0.831894838265657
GOCC_MITOCHONDRIAL_SMALL_RIBOSOMAL_SUBUNIT	SET	31	0.1681	0.0069266	0.13884	0.113	0.831894838265657
GOBP_OPTIC_NERVE_DEVELOPMENT	SET	20	0.25565	0.0084637	0.21121	0.11307	0.831894838265657
GOBP_PROTEIN_HETEROTETRAMERIZATION	SET	15	0.22127	0.006345	0.18301	0.11332	0.831894838265657
GOBP_MICROTUBULE_BASED_PROTEIN_TRANSPORT	SET	13	0.2563	0.0068424	0.21204	0.11339	0.831894838265657
GOBP_SEROTONERGIC_NEURON_AXON_GUIDANCE	SET	5	0.3633	0.0060163	0.30074	0.11353	0.831894838265657
GOBP_PHOSPHATIDYLETHANOLAMINE_METABOLIC_PROCESS	SET	29	0.18665	0.0074392	0.15453	0.11356	0.831894838265657
GOMF_RNA_POLYMERASE_I_ACTIVITY	SET	10	0.27065	0.0063376	0.22419	0.11368	0.831894838265657
GOBP_GANGLION_DEVELOPMENT	SET	17	0.26944	0.0082248	0.22323	0.11372	0.831894838265657
GOBP_DEPYRIMIDINATION	SET	8	0.37325	0.0078179	0.30941	0.11386	0.831894838265657
GOBP_RIBOSOME_BIOGENESIS	SET	294	0.054586	0.0068764	0.045252	0.11387	0.831894838265657
GOBP_NADP_METABOLIC_PROCESS	SET	42	0.15016	0.0071999	0.1245	0.11389	0.831894838265657
GOBP_GMP_METABOLIC_PROCESS	SET	25	0.2055	0.0076054	0.1704	0.11392	0.831894838265657
GOCC_CLATHRIN_COATED_VESICLE	SET	208	0.071776	0.0076236	0.059525	0.11395	0.831894838265657
GOMF_CATECHOLAMINE_BINDING	SET	12	0.32007	0.0082098	0.26582	0.11429	0.831894838265657
GOBP_REGULATION_OF_AUTOPHAGOSOME_ASSEMBLY	SET	44	0.13962	0.0068518	0.11598	0.11433	0.831894838265657
GOBP_MUSCLE_CELL_CELLULAR_HOMEOSTASIS	SET	23	0.22042	0.007825	0.18311	0.11436	0.831894838265657
GOBP_RNA_GUANINE_N7_METHYLATION	SET	6	0.44459	0.008065	0.36938	0.11438	0.831894838265657
GOBP_CHORIO_ALLANTOIC_FUSION	SET	7	0.45594	0.0089333	0.37883	0.11439	0.831894838265657
GOBP_LEUKOCYTE_DEGRANULATION	SET	77	0.11154	0.0072342	0.0927	0.11446	0.831894838265657
GOBP_NEGATIVE_REGULATION_OF_INTRACELLULAR_TRANSPORT	SET	47	0.14428	0.0073173	0.11996	0.11454	0.831894838265657
GOBP_REGULATION_OF_CARDIAC_MUSCLE_CONTRACTION_BY_CALCIUM_ION_SIGNALING	SET	23	0.22215	0.0078863	0.18482	0.1147	0.831894838265657
GOBP_PROTEASOMAL_PROTEIN_CATABOLIC_PROCESS	SET	505	0.043071	0.0070692	0.035844	0.11477	0.831894838265657
GOBP_TRNA_THIO_MODIFICATION	SET	5	0.43411	0.007189	0.36146	0.11488	0.831894838265657
GOMF_DNA_RNA_HYBRID_BINDING	SET	4	0.45306	0.0067108	0.37731	0.11493	0.831894838265657
GOMF_METAL_ION_TRANSMEMBRANE_TRANSPORTER_ACTIVITY	SET	431	0.050924	0.0077376	0.042418	0.11498	0.831894838265657
GOBP_CEREBRAL_CORTEX_RADIALLY_ORIENTED_CELL_MIGRATION	SET	33	0.18899	0.0080341	0.15744	0.11501	0.831894838265657
GOBP_NEGATIVE_REGULATION_OF_LOCOMOTION	SET	307	0.059702	0.0076827	0.049744	0.11504	0.831894838265657
GOBP_CARNITINE_TRANSPORT	SET	8	0.36583	0.0076625	0.30518	0.11533	0.831894838265657
GOBP_LONG_CHAIN_FATTY_ACYL_COA_BIOSYNTHETIC_PROCESS	SET	18	0.2487	0.0078117	0.20749	0.11534	0.831894838265657
GOBP_NEGATIVE_REGULATION_OF_CANONICAL_NF_KAPPAB_SIGNAL_TRANSDUCTION	SET	54	0.1361	0.0073972	0.11364	0.11552	0.831894838265657
GOBP_GMP_BIOSYNTHETIC_PROCESS	SET	13	0.27008	0.0072102	0.22552	0.11554	0.831894838265657
GOBP_TRICARBOXYLIC_ACID_METABOLIC_PROCESS	SET	15	0.29458	0.0084471	0.24602	0.11559	0.831894838265657
GOBP_NEURON_PROJECTION_ARBORIZATION	SET	32	0.18138	0.0075932	0.1515	0.11561	0.831894838265657
GOBP_NEGATIVE_REGULATION_OF_GLUTAMATE_SECRETION	SET	5	0.47072	0.0077953	0.39334	0.11571	0.831894838265657
GOBP_REGULATION_OF_LIPASE_ACTIVITY	SET	63	0.13187	0.0077394	0.11021	0.11574	0.831894838265657
GOCC_CRD_MEDIATED_MRNA_STABILITY_COMPLEX	SET	6	0.31393	0.0056947	0.26236	0.11575	0.831894838265657
GOBP_NEGATIVE_REGULATION_OF_APOPTOTIC_SIGNALING_PATHWAY	SET	222	0.068857	0.0075528	0.057554	0.11578	0.831894838265657
GOBP_ERYTHROSE_4_PHOSPHATE_PHOSPHOENOLPYRUVATE_FAMILY_AMINO_ACID_METABOLIC_PROCESS	SET	18	0.23733	0.0074546	0.19853	0.11596	0.832615130674003
GOBP_REGULATION_OF_PROSTATIC_BUD_FORMATION	SET	5	0.53667	0.0088874	0.4493	0.11616	0.833407417582418
GOBP_REGULATION_OF_PIGMENT_CELL_DIFFERENTIATION	SET	8	0.41529	0.0086985	0.34779	0.11623	0.833407417582418
GOBP_DNA_TEMPLATED_TRANSCRIPTION_TERMINATION	SET	23	0.18286	0.0064918	0.15349	0.11676	0.835698159509202
GOBP_REGULATION_OF_INTRINSIC_APOPTOTIC_SIGNALING_PATHWAY	SET	171	0.073207	0.0070575	0.061451	0.11678	0.835698159509202
GOBP_REGULATION_OF_SMOOTH_MUSCLE_CONTRACTION	SET	57	0.13946	0.0077869	0.1171	0.11683	0.835698159509202
GOBP_POSITIVE_REGULATION_OF_GLUCOSE_TRANSMEMBRANE_TRANSPORT	SET	42	0.14949	0.0071679	0.12567	0.11712	0.835698159509202
GOBP_REGULATION_OF_ORGANIC_ACID_TRANSPORT	SET	75	0.11694	0.0074856	0.098319	0.11716	0.835698159509202
GOBP_NUCLEAR_PORE_COMPLEX_ASSEMBLY	SET	11	0.31435	0.0077202	0.26432	0.11717	0.835698159509202
GOBP_IMMATURE_B_CELL_DIFFERENTIATION	SET	12	0.34043	0.0087321	0.28637	0.11727	0.835698159509202
GOBP_PHOSPHOLIPID_BIOSYNTHETIC_PROCESS	SET	240	0.060999	0.0069533	0.051313	0.11727	0.835698159509202
GOBP_NEGATIVE_REGULATION_OF_SYNCYTIUM_FORMATION_BY_PLASMA_MEMBRANE_FUSION	SET	4	0.44204	0.0065477	0.37192	0.11732	0.835698159509202
GOBP_REGULATION_OF_VASCULAR_PERMEABILITY	SET	48	0.15428	0.0079069	0.12985	0.1174	0.835698159509202
GOBP_NEGATIVE_REGULATION_OF_CELL_GROWTH_INVOLVED_IN_CARDIAC_MUSCLE_CELL_DEVELOPMENT	SET	10	0.34629	0.0081089	0.29149	0.11743	0.835698159509202
GOCC_KINOCILIUM	SET	10	0.35986	0.0084267	0.30325	0.11768	0.83647230873392
GOBP_NEGATIVE_REGULATION_OF_DEPHOSPHORYLATION	SET	30	0.17011	0.0068957	0.14344	0.11783	0.83647230873392
GOBP_PROTEIN_K11_LINKED_DEUBIQUITINATION	SET	9	0.30508	0.0067776	0.25727	0.11785	0.83647230873392
GOBP_MONOCYTE_CHEMOTAXIS	SET	49	0.13626	0.0070555	0.11494	0.11793	0.83647230873392
GOMF_POLYSACCHARIDE_BINDING	SET	24	0.21092	0.0076484	0.17801	0.11804	0.83647230873392
GOBP_REGULATION_OF_ADENYLATE_CYCLASE_ACTIVATING_G_PROTEIN_COUPLED_RECEPTOR_SIGNALING_PATHWAY	SET	20	0.23727	0.0078554	0.20032	0.11812	0.83647230873392
GOBP_MONOATOMIC_CATION_TRANSPORT	SET	970	0.033237	0.0074606	0.028066	0.11817	0.83647230873392
GOBP_MITOCHONDRIAL_ELECTRON_TRANSPORT_CYTOCHROME_C_TO_OXYGEN	SET	18	0.22558	0.0070855	0.19056	0.11825	0.83647230873392
GOBP_CELLULAR_RESPONSE_TO_GLUCAGON_STIMULUS	SET	12	0.305	0.0078233	0.25766	0.11827	0.83647230873392
GOMF_MUTLALPHA_COMPLEX_BINDING	SET	7	0.36275	0.0071075	0.30654	0.11834	0.83647230873392
GOMF_CYCLIN_BINDING	SET	34	0.17082	0.0073706	0.14453	0.11863	0.837954803788904
GOBP_REGULATION_OF_CATALYTIC_ACTIVITY	SET	1272	0.029077	0.0074084	0.024628	0.11888	0.837997052913597
GOBP_NEGATIVE_REGULATION_OF_EPITHELIAL_CELL_MIGRATION	SET	66	0.12086	0.0072596	0.10239	0.11893	0.837997052913597
GOBP_REGULATION_OF_LEUKOCYTE_DEGRANULATION	SET	42	0.14375	0.0068924	0.12185	0.11906	0.837997052913597
GOCC_NLS_DEPENDENT_PROTEIN_NUCLEAR_IMPORT_COMPLEX	SET	10	0.34331	0.0080392	0.29111	0.11915	0.837997052913597
GOBP_PURINE_NUCLEOSIDE_MONOPHOSPHATE_BIOSYNTHETIC_PROCESS	SET	20	0.20772	0.006877	0.17622	0.11925	0.837997052913597
GOBP_REGULATION_OF_PROTEIN_LOCALIZATION_TO_CENTROSOME	SET	12	0.25816	0.0066219	0.21919	0.11945	0.837997052913597
GOBP_TRNA_TRANSPORT	SET	6	0.32888	0.005966	0.27939	0.11958	0.837997052913597
GOBP_POSITIVE_REGULATION_OF_DEPHOSPHORYLATION	SET	51	0.13796	0.0072874	0.11722	0.11961	0.837997052913597
GOMF_TAURINE_TRANSMEMBRANE_TRANSPORTER_ACTIVITY	SET	5	0.52427	0.008682	0.44548	0.11963	0.837997052913597
GOBP_PEPTIDYL_LYSINE_HYDROXYLATION	SET	8	0.33592	0.007036	0.2855	0.11969	0.837997052913597
GOBP_INTRINSIC_APOPTOTIC_SIGNALING_PATHWAY_IN_RESPONSE_TO_DNA_DAMAGE	SET	100	0.099465	0.0073471	0.084543	0.11971	0.837997052913597
GOBP_NEGATIVE_REGULATION_OF_DENDRITIC_SPINE_MORPHOGENESIS	SET	6	0.44283	0.008033	0.37646	0.11975	0.837997052913597
GOBP_UDP_N_ACETYLGLUCOSAMINE_TRANSMEMBRANE_TRANSPORT	SET	5	0.44337	0.0073423	0.37694	0.11976	0.837997052913597
GOMF_UDP_N_ACETYLGLUCOSAMINE_TRANSMEMBRANE_TRANSPORTER_ACTIVITY	SET	5	0.44337	0.0073423	0.37694	0.11976	0.837997052913597
GOBP_GAMMA_DELTA_T_CELL_ACTIVATION	SET	24	0.21033	0.0076273	0.17888	0.11984	0.837997052913597
GOBP_AMIDE_TRANSPORT	SET	305	0.056714	0.0072747	0.048261	0.11998	0.838414457831325
GOBP_O_GLYCAN_PROCESSING	SET	41	0.15601	0.0073908	0.13294	0.1203	0.839378785857238
GOBP_REGULATION_OF_POSITIVE_CHEMOTAXIS	SET	25	0.20276	0.0075041	0.17281	0.12035	0.839378785857238
GOBP_NEGATIVE_REGULATION_OF_PROTEIN_DEPHOSPHORYLATION	SET	26	0.17853	0.0067381	0.15222	0.12044	0.839378785857238
GOBP_NEGATIVE_REGULATION_OF_DENDRITIC_CELL_DIFFERENTIATION	SET	6	0.45074	0.0081765	0.38442	0.1205	0.839378785857238
GOBP_REGULATION_OF_LOW_DENSITY_LIPOPROTEIN_PARTICLE_CLEARANCE	SET	15	0.25221	0.0072324	0.21512	0.12052	0.839378785857238
GOMF_VOLUME_SENSITIVE_ANION_CHANNEL_ACTIVITY	SET	9	0.34851	0.0077423	0.29737	0.12061	0.839446
GOMF_PHOSPHATIDYLCHOLINE_FLIPPASE_ACTIVITY	SET	5	0.46937	0.0077729	0.40094	0.12087	0.840513152676801
GOBP_TRANSCRIPTION_BY_RNA_POLYMERASE_I	SET	66	0.10738	0.00645	0.09178	0.12101	0.840513152676801
GOBP_REGULATION_OF_EOSINOPHIL_MIGRATION	SET	5	0.3942	0.0065281	0.33695	0.12102	0.840513152676801
GOBP_B_CELL_PROLIFERATION_INVOLVED_IN_IMMUNE_RESPONSE	SET	6	0.4506	0.008174	0.38537	0.12116	0.840513152676801
GOBP_TRANSMISSION_OF_NERVE_IMPULSE	SET	73	0.12221	0.0077188	0.10455	0.12122	0.840513152676801
GOBP_METHYLATION	SET	207	0.063311	0.0067085	0.054175	0.12128	0.840513152676801
GOBP_TERTIARY_ALCOHOL_METABOLIC_PROCESS	SET	22	0.21788	0.007565	0.18657	0.12145	0.840513152676801
GOBP_REGULATION_OF_TYPE_B_PANCREATIC_CELL_DEVELOPMENT	SET	9	0.32078	0.0071263	0.27472	0.12148	0.840513152676801
GOBP_AMINO_ACID_TRANSMEMBRANE_TRANSPORT	SET	95	0.10534	0.0075853	0.090267	0.12161	0.840513152676801
GOBP_NEGATIVE_REGULATION_OF_ACTIN_FILAMENT_DEPOLYMERIZATION	SET	44	0.144	0.0070667	0.12341	0.12163	0.840513152676801
GOBP_CHROMOSOME_CONDENSATION	SET	45	0.13138	0.0065197	0.11262	0.12171	0.840513152676801
GOBP_NEGATIVE_REGULATION_OF_MYOSIN_LIGHT_CHAIN_PHOSPHATASE_ACTIVITY	SET	5	0.40195	0.0066564	0.34468	0.12178	0.840513152676801
GOBP_NEUTROPHIL_MEDIATED_KILLING_OF_GRAM_NEGATIVE_BACTERIUM	SET	7	0.38998	0.007641	0.33445	0.12181	0.840513152676801
GOBP_INHIBITORY_POSTSYNAPTIC_POTENTIAL	SET	16	0.25403	0.0075231	0.21794	0.1219	0.840578599735799
GOBP_THYROID_HORMONE_TRANSPORT	SET	10	0.27972	0.0065502	0.24029	0.1222	0.841244210526316
GOMF_OXIDOREDUCTASE_ACTIVITY_ACTING_ON_PAIRED_DONORS_WITH_INCORPORATION_OR_REDUCTION_OF_MOLECULAR_OXYGEN_REDUCED_ASCORBATE_AS_ONE_DONOR_AND_INCORPORATION_OF_ONE_ATOM_OF_OXYGEN	SET	4	0.51881	0.0076848	0.44584	0.12229	0.841244210526316
GOBP_REGULATION_OF_BARBED_END_ACTIN_FILAMENT_CAPPING	SET	5	0.37005	0.0061282	0.31802	0.1223	0.841244210526316
GOBP_POSITIVE_REGULATION_OF_TRANSLATIONAL_INITIATION	SET	22	0.19804	0.0068762	0.17024	0.12236	0.841244210526316
GOBP_ZINC_ION_TRANSPORT	SET	29	0.16482	0.0065693	0.14172	0.12242	0.841244210526316
GOBP_NEGATIVE_REGULATION_OF_HEMATOPOIETIC_PROGENITOR_CELL_DIFFERENTIATION	SET	14	0.24445	0.0067722	0.21024	0.12248	0.841244210526316
GOBP_POSITIVE_REGULATION_OF_SMOOTH_MUSCLE_CONTRACTION	SET	30	0.19062	0.0077271	0.16402	0.12259	0.841288859764089
GOBP_IONOTROPIC_GLUTAMATE_RECEPTOR_SIGNALING_PATHWAY	SET	21	0.22834	0.0077461	0.19661	0.12276	0.841288859764089
GOCC_COATED_VESICLE	SET	302	0.055025	0.0070239	0.047391	0.12281	0.841288859764089
GOCC_AXON_INITIAL_SEGMENT	SET	21	0.23415	0.0079432	0.2017	0.12285	0.841288859764089
GOBP_REGULATION_OF_BONE_MINERALIZATION	SET	76	0.1154	0.0074362	0.099431	0.12291	0.841288859764089
GOBP_POSITIVE_REGULATION_OF_BLOOD_VESSEL_REMODELING	SET	2	0.64908	0.0067988	0.55941	0.12297	0.841288859764089
GOMF_SERINE_TYPE_EXOPEPTIDASE_ACTIVITY	SET	12	0.2717	0.0069691	0.2343	0.12311	0.841695088408644
GOBP_REGULATION_OF_SYNAPTIC_VESICLE_ENDOCYTOSIS	SET	18	0.22793	0.0071592	0.19682	0.12342	0.842875471698113
GOBP_MYELOID_LEUKOCYTE_MEDIATED_IMMUNITY	SET	108	0.090069	0.0069126	0.077811	0.12353	0.842875471698113
GOCC_EXTRINSIC_COMPONENT_OF_POSTSYNAPTIC_MEMBRANE	SET	7	0.33014	0.0064685	0.28533	0.12364	0.842875471698113
GOBP_REGULATION_OF_HYDROGEN_PEROXIDE_METABOLIC_PROCESS	SET	17	0.22104	0.0067474	0.19106	0.12366	0.842875471698113
GOMF_OPIOID_RECEPTOR_BINDING	SET	7	0.40542	0.0079435	0.3507	0.12384	0.842875471698113
GOCC_AXONAL_GROWTH_CONE	SET	24	0.22031	0.0079889	0.19065	0.12394	0.842875471698113
GOMF_UDP_GLUCOSYLTRANSFERASE_ACTIVITY	SET	10	0.30451	0.0071306	0.26356	0.12397	0.842875471698113
GOBP_REGULATION_OF_PROTEIN_AUTOUBIQUITINATION	SET	5	0.41288	0.0068374	0.3574	0.12401	0.842875471698113
GOBP_POSITIVE_REGULATION_OF_GRANULOCYTE_MACROPHAGE_COLONY_STIMULATING_FACTOR_PRODUCTION	SET	15	0.25498	0.0073116	0.22078	0.12408	0.842875471698113
GOCC_G_PROTEIN_COUPLED_RECEPTOR_COMPLEX	SET	11	0.3255	0.007994	0.28186	0.12409	0.842875471698113
GOBP_REGULATION_OF_DEPHOSPHORYLATION	SET	94	0.098039	0.0070223	0.084932	0.12419	0.843006241872562
GOMF_CHLORIDE_TRANSMEMBRANE_TRANSPORTER_ACTIVITY	SET	109	0.095868	0.0073914	0.083091	0.1243	0.84312140077821
GOMF_VOLTAGE_GATED_SODIUM_CHANNEL_ACTIVITY	SET	23	0.2361	0.0083818	0.20469	0.12437	0.84312140077821
GOBP_REGULATION_OF_ENDOSOME_SIZE	SET	13	0.25616	0.0068386	0.22219	0.12449	0.84312140077821
GOMF_MHC_CLASS_II_PROTEIN_COMPLEX_BINDING	SET	25	0.21715	0.0080366	0.18839	0.12453	0.84312140077821
GOBP_REPLICATION_BORN_DOUBLE_STRAND_BREAK_REPAIR_VIA_SISTER_CHROMATID_EXCHANGE	SET	6	0.30919	0.0056089	0.26843	0.1247	0.84357360931436
GOBP_CLATHRIN_DEPENDENT_ENDOCYTOSIS	SET	48	0.14349	0.0073536	0.12464	0.12482	0.84357360931436
GOBP_REGULATION_OF_RIG_I_SIGNALING_PATHWAY	SET	20	0.20783	0.0068805	0.1806	0.12492	0.84357360931436
GOCC_NUCLEAR_INCLUSION_BODY	SET	12	0.27625	0.0070859	0.24006	0.12492	0.84357360931436
GOBP_RIBOSE_PHOSPHATE_BIOSYNTHETIC_PROCESS	SET	205	0.063191	0.0066638	0.054971	0.12517	0.844715449256626
GOBP_RESPONSE_TO_HEAT	SET	98	0.098105	0.0071743	0.085377	0.12527	0.844844186046512
GOBP_ORGANELLE_INHERITANCE	SET	15	0.26812	0.0076886	0.23376	0.1257	0.847196901226598
GOBP_POSITIVE_REGULATION_OF_UTERINE_SMOOTH_MUSCLE_CONTRACTION	SET	8	0.35282	0.0073901	0.30783	0.12587	0.84779535483871
GOBP_AUTOPHAGY_OF_MITOCHONDRION	SET	99	0.089414	0.0065717	0.07811	0.12617	0.848426237942122
GOBP_RETINOIC_ACID_RECEPTOR_SIGNALING_PATHWAY	SET	32	0.17056	0.0071401	0.14903	0.12623	0.848426237942122
GOMF_ACTIN_FILAMENT_BINDING	SET	204	0.067943	0.0071475	0.05939	0.12632	0.848426237942122
GOMF_ATP_HYDROLYSIS_ACTIVITY	SET	395	0.046103	0.0067129	0.040303	0.12634	0.848426237942122
GOBP_NEGATIVE_REGULATION_OF_MITOCHONDRIAL_OUTER_MEMBRANE_PERMEABILIZATION_INVOLVED_IN_APOPTOTIC_SIGNALING_PATHWAY	SET	12	0.2792	0.0071615	0.24411	0.12637	0.848426237942122
GOMF_TUMOR_NECROSIS_FACTOR_RECEPTOR_BINDING	SET	29	0.17895	0.0071321	0.15654	0.1265	0.848735815147625
GOBP_REGULATION_OF_BMP_SIGNALING_PATHWAY	SET	102	0.10408	0.0077644	0.091109	0.12665	0.848735815147625
GOBP_NEGATIVE_REGULATION_OF_RECEPTOR_SIGNALING_PATHWAY_VIA_JAK_STAT	SET	20	0.22505	0.0074508	0.197	0.12666	0.848735815147625
GOMF_PROTEIN_KINASE_C_BINDING	SET	51	0.13243	0.0069954	0.11599	0.12679	0.848986153846154
GOBP_NEGATIVE_REGULATION_OF_PHOSPHOLIPASE_ACTIVITY	SET	5	0.48554	0.0080406	0.42538	0.12686	0.848986153846154
GOBP_HAIR_FOLLICLE_MATURATION	SET	15	0.26374	0.0075628	0.23119	0.12699	0.849311723254324
GOBP_NEGATIVE_REGULATION_OF_LIPOPOLYSACCHARIDE_MEDIATED_SIGNALING_PATHWAY	SET	14	0.28372	0.0078602	0.24885	0.12713	0.849361514195584
GOMF_PHOSPHATIDYLINOSITOL_TRANSFER_ACTIVITY	SET	10	0.28051	0.0065687	0.24631	0.12739	0.849361514195584
GOBP_NEGATIVE_REGULATION_OF_VASCULAR_ENDOTHELIAL_GROWTH_FACTOR_RECEPTOR_SIGNALING_PATHWAY	SET	11	0.26044	0.0063961	0.22871	0.12741	0.849361514195584
GOBP_LIPID_LOCALIZATION	SET	471	0.04544	0.0072095	0.039934	0.1276	0.849361514195584
GOMF_GALACTOSIDASE_ACTIVITY	SET	6	0.40711	0.0073851	0.35782	0.12762	0.849361514195584
GOBP_MIGRACYTOSIS	SET	5	0.50282	0.0083268	0.44201	0.12766	0.849361514195584
GOMF_MONOATOMIC_ANION_TRANSMEMBRANE_TRANSPORTER_ACTIVITY	SET	133	0.086027	0.0073217	0.07567	0.1278	0.849361514195584
GOBP_TRANSLATIONAL_INITIATION	SET	110	0.081548	0.0063159	0.071754	0.12788	0.849361514195584
GOBP_MUCUS_SECRETION	SET	19	0.2362	0.007622	0.208	0.12808	0.849361514195584
GOBP_SULFUR_COMPOUND_BIOSYNTHETIC_PROCESS	SET	160	0.077698	0.0072477	0.068459	0.1282	0.849361514195584
GOBP_NEGATIVE_REGULATION_OF_PROTEIN_EXPORT_FROM_NUCLEUS	SET	6	0.35035	0.0063555	0.30871	0.12822	0.849361514195584
GOMF_PROTEIN_KINASE_ACTIVITY	SET	551	0.041104	0.0070378	0.036229	0.12828	0.849361514195584
GOBP_IRON_ION_TRANSPORT	SET	51	0.13693	0.0072329	0.12073	0.12837	0.849361514195584
GOMF_MRNA_REGULATORY_ELEMENT_BINDING_TRANSLATION_REPRESSOR_ACTIVITY	SET	15	0.22719	0.0065149	0.20042	0.12849	0.849361514195584
GOBP_PROTEIN_COMPLEX_OLIGOMERIZATION	SET	256	0.05909	0.0069535	0.052132	0.12852	0.849361514195584
GOMF_SEMAPHORIN_RECEPTOR_BINDING	SET	23	0.17906	0.0063565	0.15798	0.12853	0.849361514195584
GOBP_PLASMA_CELL_DIFFERENTIATION	SET	9	0.28159	0.0062556	0.24848	0.12857	0.849361514195584
GOBP_POSITIVE_REGULATION_OF_INFLAMMASOME_MEDIATED_SIGNALING_PATHWAY	SET	19	0.20504	0.0066165	0.18095	0.12859	0.849361514195584
GOBP_PURINE_RIBONUCLEOSIDE_SALVAGE	SET	6	0.43928	0.0079688	0.38794	0.12875	0.849361514195584
GOBP_NEGATIVE_REGULATION_OF_CHOLESTEROL_EFFLUX	SET	5	0.42388	0.0070196	0.37439	0.12878	0.849361514195584
GOMF_LYSOZYME_ACTIVITY	SET	9	0.29374	0.0065255	0.25949	0.12883	0.849361514195584
GOBP_SOFT_PALATE_DEVELOPMENT	SET	5	0.45192	0.0074839	0.39932	0.12888	0.849361514195584
GOBP_REGULATION_OF_ENDOCYTIC_RECYCLING	SET	20	0.22862	0.007569	0.20206	0.12894	0.849361514195584
GOBP_SODIUM_INDEPENDENT_ORGANIC_ANION_TRANSPORT	SET	15	0.31158	0.0089347	0.27539	0.12895	0.849361514195584
GOMF_GAMMA_CATENIN_BINDING	SET	12	0.29161	0.0074798	0.25793	0.12912	0.849945018915511
GOBP_REGULATION_OF_CELL_CYCLE_G1_S_PHASE_TRANSITION	SET	177	0.070088	0.0068731	0.062014	0.12921	0.849982882315922
GOBP_MORPHOGENESIS_OF_AN_EPITHELIAL_FOLD	SET	23	0.21504	0.0076341	0.19039	0.12935	0.849982882315922
GOCC_GAMMA_SECRETASE_COMPLEX	SET	7	0.34886	0.0068354	0.30889	0.12937	0.849982882315922
GOBP_KETONE_BIOSYNTHETIC_PROCESS	SET	47	0.12586	0.006383	0.11157	0.12964	0.851221132075472
GOBP_POSITIVE_REGULATION_OF_BONE_MINERALIZATION	SET	43	0.15372	0.0074577	0.13649	0.13004	0.852883814303639
GOMF_DEHYDROASCORBIC_ACID_TRANSMEMBRANE_TRANSPORTER_ACTIVITY	SET	8	0.31495	0.0065968	0.27972	0.1301	0.852883814303639
GOBP_MRNA_MODIFICATION	SET	19	0.1762	0.0056859	0.15655	0.13019	0.852883814303639
GOCC_PERINUCLEAR_THECA	SET	4	0.59244	0.0087755	0.52642	0.13022	0.852883814303639
GOBP_EARLY_ENDOSOME_TO_RECYCLING_ENDOSOME_TRANSPORT	SET	7	0.39656	0.00777	0.35255	0.13034	0.853134545454546
GOBP_LUNG_VASCULATURE_DEVELOPMENT	SET	9	0.31064	0.0069011	0.27631	0.13046	0.853334311926606
GOBP_NEGATIVE_REGULATION_OF_SYNAPTIC_VESICLE_EXOCYTOSIS	SET	4	0.52102	0.0077176	0.46403	0.13077	0.853334311926606
GOBP_AXIS_ELONGATION	SET	29	0.18792	0.0074896	0.16745	0.1309	0.853334311926606
GOBP_LIPID_TRANSPORT_ACROSS_BLOOD_BRAIN_BARRIER	SET	6	0.36385	0.0066004	0.32428	0.13093	0.853334311926606
GOMF_NUCLEAR_ESTROGEN_RECEPTOR_BINDING	SET	39	0.14601	0.0067468	0.13016	0.13099	0.853334311926606
GOBP_CDP_DIACYLGLYCEROL_BIOSYNTHETIC_PROCESS	SET	13	0.27884	0.0074443	0.24865	0.13106	0.853334311926606
GOBP_RESPONSE_TO_L_PHENYLALANINE_DERIVATIVE	SET	6	0.3992	0.0072417	0.35616	0.13118	0.853334311926606
GOBP_FOLIC_ACID_CONTAINING_COMPOUND_BIOSYNTHETIC_PROCESS	SET	9	0.2993	0.0066492	0.26732	0.13144	0.853334311926606
GOMF_SODIUM_BICARBONATE_SYMPORTER_ACTIVITY	SET	6	0.38822	0.0070424	0.34675	0.13145	0.853334311926606
GOBP_PERISTALSIS	SET	12	0.30101	0.007721	0.26893	0.13152	0.853334311926606
GOMF_LIGASE_ACTIVITY_FORMING_CARBON_OXYGEN_BONDS	SET	41	0.12665	0.006	0.11319	0.13159	0.853334311926606
GOBP_REGULATION_OF_PLASMA_MEMBRANE_REPAIR	SET	6	0.40045	0.0072644	0.35832	0.13188	0.853334311926606
GOCC_CUL4A_RING_E3_UBIQUITIN_LIGASE_COMPLEX	SET	13	0.24942	0.0066587	0.22319	0.13189	0.853334311926606
GOBP_REGULATION_OF_STEM_CELL_DIVISION	SET	11	0.27056	0.0066446	0.24218	0.13196	0.853334311926606
GOCC_SECONDARY_LYSOSOME	SET	20	0.20116	0.0066599	0.18007	0.13197	0.853334311926606
GOBP_ESTABLISHMENT_OR_MAINTENANCE_OF_CYTOSKELETON_POLARITY	SET	7	0.31696	0.0062103	0.28387	0.1321	0.853334311926606
GOBP_DOUBLE_STRAND_BREAK_REPAIR_INVOLVED_IN_MEIOTIC_RECOMBINATION	SET	11	0.32862	0.0080705	0.29453	0.13227	0.853334311926606
GOBP_SUBSTRATE_DEPENDENT_CELL_MIGRATION	SET	25	0.20287	0.0075082	0.18183	0.13227	0.853334311926606
GOBP_POSITIVE_REGULATION_OF_LEUKOCYTE_CHEMOTAXIS	SET	91	0.097038	0.0068394	0.086973	0.13228	0.853334311926606
GOBP_NEGATIVE_REGULATION_OF_HEMATOPOIETIC_STEM_CELL_DIFFERENTIATION	SET	5	0.39132	0.0064804	0.35083	0.13234	0.853334311926606
GOMF_STRUCTURAL_CONSTITUENT_OF_NUCLEAR_PORE	SET	23	0.1805	0.0064078	0.16189	0.13245	0.853334311926606
GOMF_N_ACETYLTRANSFERASE_ACTIVITY	SET	63	0.10948	0.0064254	0.098269	0.13262	0.853334311926606
GOBP_NEGATIVE_REGULATION_OF_EPINEPHRINE_SECRETION	SET	5	0.41725	0.0069098	0.37459	0.13267	0.853334311926606
GOBP_NEGATIVE_REGULATION_OF_RESPONSE_TO_ENDOPLASMIC_RETICULUM_STRESS	SET	43	0.13153	0.0063811	0.11817	0.13284	0.853334311926606
GOBP_DEVELOPMENTAL_GROWTH_INVOLVED_IN_MORPHOGENESIS	SET	217	0.067462	0.0073169	0.060624	0.13291	0.853334311926606
GOMF_RS_DOMAIN_BINDING	SET	5	0.36638	0.0060673	0.3294	0.13303	0.853334311926606
GOBP_POSITIVE_REGULATION_OF_AGGREPHAGY	SET	6	0.40012	0.0072584	0.35985	0.13309	0.853334311926606
GOBP_MIDBRAIN_DOPAMINERGIC_NEURON_DIFFERENTIATION	SET	16	0.24334	0.0072066	0.21888	0.13312	0.853334311926606
GOMF_CALCIUM_DEPENDENT_PROTEIN_KINASE_ACTIVITY	SET	10	0.28642	0.0067071	0.25772	0.13321	0.853334311926606
GOBP_MYELOID_CELL_DEVELOPMENT	SET	84	0.099008	0.0067058	0.089094	0.13323	0.853334311926606
GOBP_REGULATION_OF_MYOSIN_LIGHT_CHAIN_PHOSPHATASE_ACTIVITY	SET	7	0.34464	0.0067526	0.31021	0.1333	0.853334311926606
GOCC_ENDOPLASMIC_RETICULUM_GOLGI_INTERMEDIATE_COMPARTMENT_MEMBRANE	SET	75	0.10674	0.0068332	0.096117	0.13338	0.853334311926606
GOCC_WASH_COMPLEX	SET	12	0.27664	0.0070959	0.24915	0.13343	0.853334311926606
GOBP_PURINE_NUCLEOSIDE_BIOSYNTHETIC_PROCESS	SET	10	0.33958	0.0079517	0.30585	0.13345	0.853334311926606
GOBP_ANATOMICAL_STRUCTURE_MATURATION	SET	263	0.058454	0.0069708	0.052654	0.13347	0.853334311926606
GOBP_NEGATIVE_REGULATION_OF_NUCLEAR_TRANSCRIBED_MRNA_CATABOLIC_PROCESS_DEADENYLATION_DEPENDENT_DECAY	SET	12	0.24809	0.0063636	0.22348	0.13348	0.853334311926606
GOBP_VIRAL_GENE_EXPRESSION	SET	99	0.085114	0.0062558	0.076687	0.13353	0.853334311926606
GOBP_DOLICHYL_DIPHOSPHATE_METABOLIC_PROCESS	SET	5	0.38765	0.0064196	0.34937	0.1336	0.853334311926606
GOBP_INTRACELLULAR_GLUCOSE_HOMEOSTASIS	SET	147	0.076742	0.006864	0.069166	0.13361	0.853334311926606
GOMF_AMINOACYL_TRNA_HYDROLASE_ACTIVITY	SET	5	0.34109	0.0056486	0.30746	0.13364	0.853334311926606
GOBP_ESTABLISHMENT_OF_PROTEIN_LOCALIZATION_TO_PEROXISOME	SET	19	0.189	0.0060989	0.17052	0.13385	0.853708413461538
GOBP_POSITIVE_REGULATION_OF_RIG_I_SIGNALING_PATHWAY	SET	10	0.29078	0.0068091	0.26238	0.13388	0.853708413461538
GOMF_CARBOHYDRATE_KINASE_ACTIVITY	SET	20	0.19252	0.0063738	0.17379	0.13399	0.853708413461538
GOMF_NEUROPEPTIDE_RECEPTOR_ACTIVITY	SET	42	0.16535	0.0079281	0.14941	0.13423	0.853708413461538
GOBP_POSITIVE_REGULATION_OF_DENDRITIC_SPINE_MAINTENANCE	SET	5	0.46112	0.0076364	0.41671	0.13425	0.853708413461538
GOBP_ER_OVERLOAD_RESPONSE	SET	11	0.29065	0.0071379	0.26279	0.13437	0.853708413461538
GOBP_MAINTENANCE_OF_PROTEIN_LOCALIZATION_IN_ORGANELLE	SET	43	0.13123	0.0063662	0.11873	0.13453	0.853708413461538
GOBP_TAURINE_METABOLIC_PROCESS	SET	9	0.32139	0.0071398	0.29086	0.1346	0.853708413461538
GOBP_SYNAPTIC_TRANSMISSION_DOPAMINERGIC	SET	28	0.17039	0.0066733	0.15423	0.13462	0.853708413461538
GOBP_NEGATIVE_REGULATION_OF_BMP_SIGNALING_PATHWAY	SET	57	0.1358	0.0075824	0.12302	0.13482	0.853708413461538
GOBP_IMMUNE_RESPONSE_REGULATING_SIGNALING_PATHWAY	SET	509	0.042101	0.0069366	0.038143	0.13485	0.853708413461538
GOBP_ACETYLCHOLINE_SECRETION	SET	5	0.31422	0.0052036	0.28484	0.13499	0.853708413461538
GOBP_RECEPTOR_METABOLIC_PROCESS	SET	70	0.10527	0.0065111	0.095497	0.13517	0.853708413461538
GOBP_TYROSINE_CATABOLIC_PROCESS	SET	6	0.32986	0.0059838	0.29929	0.13521	0.853708413461538
GOBP_NEUROMUSCULAR_SYNAPTIC_TRANSMISSION	SET	28	0.16591	0.0064978	0.15062	0.13533	0.853708413461538
GOBP_POSITIVE_REGULATION_OF_VIRAL_GENOME_REPLICATION	SET	30	0.13761	0.0055783	0.12493	0.13534	0.853708413461538
GOBP_DORSAL_SPINAL_CORD_DEVELOPMENT	SET	20	0.2169	0.0071811	0.19692	0.13535	0.853708413461538
GOCC_GOLGI_MEMBRANE	SET	652	0.036144	0.0067127	0.032821	0.1354	0.853708413461538
GOBP_MITOCHONDRION_ORGANIZATION	SET	486	0.039552	0.0063717	0.035921	0.13544	0.853708413461538
GOBP_DORSAL_VENTRAL_PATTERN_FORMATION	SET	90	0.1035	0.0072546	0.094018	0.13549	0.853708413461538
GOBP_SYNAPTIC_VESICLE_PRIMING	SET	19	0.20818	0.0067178	0.18911	0.13549	0.853708413461538
GOBP_CYSTEINE_METABOLIC_PROCESS	SET	11	0.29125	0.0071527	0.26465	0.13556	0.853708413461538
GOBP_POSITIVE_REGULATION_OF_INSULIN_SECRETION_INVOLVED_IN_CELLULAR_RESPONSE_TO_GLUCOSE_STIMULUS	SET	30	0.15928	0.0064568	0.14475	0.13559	0.853708413461538
GOBP_REGULATION_OF_NODAL_SIGNALING_PATHWAY	SET	7	0.3993	0.0078236	0.36322	0.13582	0.853708413461538
GOBP_REGULATION_OF_NATURAL_KILLER_CELL_DIFFERENTIATION	SET	13	0.27063	0.0072249	0.24626	0.1359	0.853708413461538
GOBP_BARBED_END_ACTIN_FILAMENT_CAPPING	SET	25	0.17744	0.006567	0.1615	0.13595	0.853708413461538
GOMF_4_IRON_4_SULFUR_CLUSTER_BINDING	SET	44	0.12913	0.0063369	0.11754	0.13597	0.853708413461538
GOBP_BONE_GROWTH	SET	31	0.17566	0.0072381	0.15995	0.13606	0.853708413461538
GOBP_NEGATIVE_REGULATION_OF_BICELLULAR_TIGHT_JUNCTION_ASSEMBLY	SET	4	0.40612	0.0060156	0.36981	0.13607	0.853708413461538
GOBP_REGULATION_OF_CELLULAR_PH_REDUCTION	SET	7	0.32976	0.0064611	0.30052	0.13626	0.854187515006002
GOBP_PROTEIN_ACETYLATION	SET	51	0.12261	0.0064765	0.11176	0.13631	0.854187515006002
GOBP_N_TERMINAL_PEPTIDYL_METHIONINE_ACETYLATION	SET	5	0.44182	0.0073167	0.4031	0.13654	0.854778909526663
GOBP_REGULATION_OF_DENDRITE_MORPHOGENESIS	SET	58	0.12444	0.0070082	0.11355	0.13659	0.854778909526663
GOBP_POSITIVE_REGULATION_OF_PROTEIN_LOCALIZATION_TO_CELL_PERIPHERY	SET	71	0.10508	0.0065454	0.095916	0.13665	0.854778909526663
GOMF_STAT_FAMILY_PROTEIN_BINDING	SET	11	0.25328	0.0062202	0.23145	0.13692	0.85510651524208
GOBP_NEGATIVE_REGULATION_OF_FATTY_ACID_BETA_OXIDATION	SET	6	0.41625	0.0075509	0.38041	0.13694	0.85510651524208
GOBP_NEGATIVE_REGULATION_OF_LEUKOCYTE_MIGRATION	SET	52	0.13269	0.007077	0.1213	0.13702	0.85510651524208
GOBP_SPERM_CAPACITATION	SET	32	0.16489	0.006903	0.15075	0.13703	0.85510651524208
GOMF_MINOR_GROOVE_OF_ADENINE_THYMINE_RICH_DNA_BINDING	SET	10	0.32145	0.0075273	0.29422	0.1373	0.856279569892473
GOMF_CARBOHYDRATE_TRANSMEMBRANE_TRANSPORTER_ACTIVITY	SET	40	0.15184	0.0071051	0.13903	0.1374	0.856391641791045
GOBP_LIVER_MORPHOGENESIS	SET	25	0.17585	0.0065081	0.16108	0.13749	0.856441288782816
GOBP_OPTIC_NERVE_MORPHOGENESIS	SET	6	0.43096	0.0078177	0.39503	0.13766	0.856602622169249
GOBP_REGULATION_OF_SYNAPTIC_VESICLE_RECYCLING	SET	24	0.17928	0.0065013	0.16435	0.13768	0.856602622169249
GOBP_MESODERM_MORPHOGENESIS	SET	73	0.11158	0.007047	0.10238	0.1379	0.857061273051755
GOBP_PROTEIN_IMPORT_INTO_PEROXISOME_MATRIX_RECEPTOR_RECYCLING	SET	6	0.29826	0.0054105	0.27373	0.13795	0.857061273051755
GOBP_POSITIVE_REGULATION_OF_PROGRAMMED_CELL_DEATH	SET	514	0.040532	0.0067098	0.037206	0.138	0.857061273051755
GOMF_CALCIUM_SODIUM_ANTIPORTER_ACTIVITY	SET	10	0.29068	0.0068066	0.26703	0.13819	0.857731034482759
GOBP_CENTRAL_NERVOUS_SYSTEM_NEURON_AXONOGENESIS	SET	37	0.16473	0.0074145	0.15151	0.13847	0.858537196924896
GOBP_AV_NODE_CELL_TO_BUNDLE_OF_HIS_CELL_COMMUNICATION	SET	13	0.24694	0.0065924	0.2272	0.13855	0.858537196924896
GOBP_ASTROCYTE_DEVELOPMENT	SET	40	0.14443	0.0067584	0.133	0.13877	0.858537196924896
GOBP_PROTEIN_O_LINKED_FUCOSYLATION	SET	5	0.35115	0.0058151	0.3234	0.13879	0.858537196924896
GOBP_LEUKOCYTE_MIGRATION	SET	382	0.049638	0.0071103	0.045753	0.13899	0.858537196924896
GOBP_MAGNESIUM_ION_HOMEOSTASIS	SET	11	0.29395	0.0072192	0.27095	0.13899	0.858537196924896
GOBP_AXON_CHOICE_POINT_RECOGNITION	SET	7	0.40184	0.0078734	0.37046	0.13903	0.858537196924896
GOMF_INTRACELLULARLY_GATED_CALCIUM_CHANNEL_ACTIVITY	SET	18	0.23749	0.0074594	0.21895	0.13905	0.858537196924896
GOBP_ENERGY_HOMEOSTASIS	SET	81	0.10906	0.007254	0.10055	0.13906	0.858537196924896
GOBP_REGULATION_OF_LONG_CHAIN_FATTY_ACID_IMPORT_INTO_CELL	SET	8	0.29818	0.0062456	0.27513	0.13924	0.858591509433962
GOBP_ADENYLATE_CYCLASE_ACTIVATING_DOPAMINE_RECEPTOR_SIGNALING_PATHWAY	SET	10	0.32024	0.007499	0.29556	0.13929	0.858591509433962
GOMF_3_5_DNA_EXONUCLEASE_ACTIVITY	SET	14	0.22018	0.0060999	0.2033	0.13941	0.858591509433962
GOBP_SYNAPTIC_VESICLE_LUMEN_ACIDIFICATION	SET	15	0.22791	0.0065354	0.21045	0.13942	0.858591509433962
GOBP_POSITIVE_REGULATION_OF_FEVER_GENERATION	SET	7	0.37604	0.0073679	0.34732	0.13948	0.858591509433962
GOBP_PEPTIDYL_TYROSINE_DEPHOSPHORYLATION_INVOLVED_IN_INACTIVATION_OF_PROTEIN_KINASE_ACTIVITY	SET	8	0.30319	0.0063505	0.28022	0.13964	0.859069888037714
GOMF_NUCLEAR_LOCALIZATION_SEQUENCE_BINDING	SET	24	0.20804	0.0075442	0.19239	0.13978	0.859424734982332
GOMF_ACID_AMINO_ACID_LIGASE_ACTIVITY	SET	22	0.19827	0.0068843	0.18355	0.14003	0.859674500587544
GOMF_EPHRIN_RECEPTOR_ACTIVITY	SET	18	0.23077	0.0072483	0.21366	0.14006	0.859674500587544
GOCC_T_TUBULE	SET	52	0.13399	0.0071463	0.12406	0.14008	0.859674500587544
GOBP_GLUCURONATE_CATABOLIC_PROCESS_TO_XYLULOSE_5_PHOSPHATE	SET	5	0.36957	0.0061202	0.3423	0.14015	0.859674500587544
GOMF_G_QUADRUPLEX_DNA_BINDING	SET	11	0.295	0.0072449	0.27352	0.1404	0.860258450704225
GOBP_REGULATION_OF_NUCLEAR_TRANSCRIBED_MRNA_POLY_A_TAIL_SHORTENING	SET	15	0.25416	0.0072881	0.23566	0.14041	0.860258450704225
GOBP_PROTEIN_PALMITOYLATION	SET	29	0.15419	0.0061455	0.14302	0.1405	0.860304985337243
GOBP_VIRAL_TRANSLATION	SET	19	0.18943	0.0061128	0.17588	0.14074	0.861101462843768
GOBP_POSITIVE_REGULATION_OF_PROTEASOMAL_UBIQUITIN_DEPENDENT_PROTEIN_CATABOLIC_PROCESS	SET	75	0.10204	0.0065321	0.094792	0.14087	0.861101462843768
GOMF_INSULIN_BINDING	SET	5	0.36336	0.0060173	0.33763	0.14092	0.861101462843768
GOBP_NEGATIVE_REGULATION_OF_MEMBRANE_DEPOLARIZATION	SET	7	0.34579	0.0067751	0.32136	0.14096	0.861101462843768
GOMF_MAP_KINASE_ACTIVITY	SET	16	0.24577	0.0072786	0.22872	0.14129	0.861955166374781
GOBP_POSITIVE_REGULATION_OF_GAMMA_DELTA_T_CELL_ACTIVATION	SET	9	0.32221	0.0071581	0.29989	0.14132	0.861955166374781
GOBP_NEGATIVE_REGULATION_OF_DEVELOPMENTAL_PROCESS	SET	851	0.032724	0.0069039	0.030465	0.14138	0.861955166374781
GOMF_NUCLEOSIDE_BINDING	SET	8	0.26335	0.0055161	0.24522	0.14143	0.861955166374781
GOBP_CELLULAR_RESPONSE_TO_ANTIBIOTIC	SET	11	0.28068	0.0068933	0.26153	0.14159	0.862045714285714
GOBP_GOLGI_DISASSEMBLY	SET	6	0.36215	0.0065695	0.33746	0.14161	0.862045714285714
GOMF_ALCOHOL_TRANSMEMBRANE_TRANSPORTER_ACTIVITY	SET	6	0.38296	0.0069471	0.35707	0.14175	0.862136051252184
GOBP_MONOSACCHARIDE_BIOSYNTHETIC_PROCESS	SET	89	0.088885	0.0061958	0.082887	0.14179	0.862136051252184
GOBP_NEGATIVE_REGULATION_OF_BLOOD_CIRCULATION	SET	21	0.1969	0.0066797	0.18386	0.14211	0.86306023255814
GOBP_FATTY_ACID_HOMEOSTASIS	SET	15	0.21091	0.0060478	0.19697	0.14214	0.86306023255814
GOBP_REGULATION_OF_SYNAPSE_STRUCTURAL_PLASTICITY	SET	7	0.32997	0.0064653	0.30822	0.14219	0.86306023255814
GOBP_TANGENTIAL_MIGRATION_FROM_THE_SUBVENTRICULAR_ZONE_TO_THE_OLFACTORY_BULB	SET	7	0.38737	0.0075899	0.36213	0.14238	0.863711330621732
GOMF_PEROXIREDOXIN_ACTIVITY	SET	7	0.28568	0.0055973	0.26716	0.14248	0.863816027874564
GOBP_CHLORIDE_TRANSPORT	SET	115	0.084713	0.0067076	0.079314	0.14275	0.864630626450116
GOMF_TORC2_COMPLEX_BINDING	SET	5	0.42004	0.006956	0.39333	0.14278	0.864630626450116
GOBP_INNER_EAR_MORPHOGENESIS	SET	105	0.091351	0.0069135	0.085607	0.14297	0.865201390498262
GOMF_CORE_PROMOTER_SEQUENCE_SPECIFIC_DNA_BINDING	SET	39	0.1447	0.0066861	0.13564	0.14304	0.865201390498262
GOCC_CHROMATIN_SILENCING_COMPLEX	SET	12	0.26022	0.0066747	0.24408	0.14319	0.865607180081066
GOBP_VITAMIN_BIOSYNTHETIC_PROCESS	SET	24	0.18054	0.006547	0.16956	0.1435	0.866979166666667
GOBP_LUTEINIZATION	SET	12	0.27434	0.0070369	0.25807	0.14389	0.868832620011567
GOMF_LOW_DENSITY_LIPOPROTEIN_PARTICLE_RECEPTOR_BINDING	SET	24	0.17906	0.0064933	0.16858	0.14408	0.869476994219653
GOMF_LIPID_TRANSMEMBRANE_TRANSPORTER_ACTIVITY	SET	54	0.12631	0.0068647	0.11909	0.14444	0.871145927209705
GOBP_POSITIVE_REGULATION_OF_CHEMOTAXIS	SET	138	0.074679	0.0064734	0.070451	0.14458	0.871486836027714
GOMF_ACTIVIN_RECEPTOR_ACTIVITY	SET	9	0.33898	0.0075305	0.32013	0.14484	0.872401293800539
GOMF_SOMATOSTATIN_RECEPTOR_ACTIVITY	SET	5	0.43278	0.007167	0.40916	0.14509	0.872401293800539
GOBP_RESPONSE_TO_NITROSATIVE_STRESS	SET	10	0.27721	0.0064912	0.26208	0.1451	0.872401293800539
GOMF_WNT_RECEPTOR_ACTIVITY	SET	17	0.24423	0.0074553	0.23095	0.14515	0.872401293800539
GOBP_ACUTE_INFLAMMATORY_RESPONSE	SET	101	0.095459	0.0070862	0.090346	0.14536	0.872401293800539
GOBP_NEUROMUSCULAR_PROCESS	SET	162	0.069895	0.0065601	0.066161	0.14539	0.872401293800539
GOBP_HETEROCHROMATIN_ORGANIZATION	SET	13	0.21411	0.0057162	0.2028	0.14553	0.872401293800539
GOCC_APOLIPOPROTEIN_B_MRNA_EDITING_ENZYME_COMPLEX	SET	5	0.36233	0.0060003	0.34319	0.14554	0.872401293800539
GOBP_NEGATIVE_REGULATION_OF_CHEMOTAXIS	SET	44	0.13864	0.0068033	0.13147	0.14584	0.872401293800539
GOBP_ALKANESULFONATE_TRANSMEMBRANE_TRANSPORT	SET	8	0.35918	0.0075232	0.3411	0.14618	0.872401293800539
GOMF_PURINE_NUCLEOTIDE_BINDING	SET	1882	0.020901	0.0063599	0.019859	0.1463	0.872401293800539
GOBP_REGULATION_OF_INSULIN_SECRETION_INVOLVED_IN_CELLULAR_RESPONSE_TO_GLUCOSE_STIMULUS	SET	53	0.11871	0.0063922	0.11281	0.14632	0.872401293800539
GOBP_CELL_VOLUME_HOMEOSTASIS	SET	34	0.14357	0.0061949	0.13648	0.14643	0.872401293800539
GOBP_EPINEPHRINE_SECRETION	SET	7	0.34861	0.0068305	0.33151	0.1465	0.872401293800539
GOBP_POSITIVE_REGULATION_OF_DNA_BINDING_TRANSCRIPTION_FACTOR_ACTIVITY	SET	203	0.060239	0.0063218	0.057311	0.14661	0.872401293800539
GOMF_ALCOHOL_DEHYDROGENASE_NAD_P_PLUS_ACTIVITY	SET	24	0.19075	0.0069171	0.18149	0.14663	0.872401293800539
GOBP_NEGATIVE_REGULATION_OF_TRANSCRIPTION_REGULATORY_REGION_DNA_BINDING	SET	8	0.31103	0.0065147	0.29595	0.14664	0.872401293800539
GOMF_HISTONE_H3K4ME_H3K4ME2_H3K4ME3_DEMETHYLASE_ACTIVITY	SET	3	0.52004	0.0066712	0.49501	0.14673	0.872401293800539
GOMF_PASSIVE_TRANSMEMBRANE_TRANSPORTER_ACTIVITY	SET	481	0.042057	0.0067414	0.040032	0.14673	0.872401293800539
GOMF_ATP_DEPENDENT_PROTEIN_DISAGGREGASE_ACTIVITY	SET	6	0.34638	0.0062834	0.32976	0.14678	0.872401293800539
GOBP_POSITIVE_REGULATION_OF_POTASSIUM_ION_TRANSPORT	SET	39	0.15752	0.0072787	0.15004	0.1469	0.872401293800539
GOBP_NATURAL_KILLER_CELL_ACTIVATION	SET	94	0.097392	0.006976	0.092786	0.14695	0.872401293800539
GOBP_MAINTENANCE_OF_PROTEIN_LOCATION_IN_CELL	SET	63	0.10532	0.0061812	0.10035	0.14699	0.872401293800539
GOBP_NOREPINEPHRINE_SECRETION	SET	14	0.23135	0.0064093	0.22055	0.1471	0.872401293800539
GOBP_MRNA_3_END_PROCESSING	SET	38	0.12709	0.005797	0.12116	0.14711	0.872401293800539
GOBP_PEPTIDYL_LYSINE_MODIFICATION	SET	139	0.07109	0.0061844	0.067784	0.14715	0.872401293800539
GOBP_PROSTATE_GLAND_MORPHOGENESIS	SET	27	0.1993	0.0076651	0.19004	0.14716	0.872401293800539
GOBP_PARAXIAL_MESODERM_MORPHOGENESIS	SET	10	0.27177	0.0063639	0.25953	0.14752	0.872401293800539
GOBP_APOPTOTIC_PROCESS	SET	1795	0.021541	0.0064184	0.020581	0.14764	0.872401293800539
GOBP_PYRIMIDINE_NUCLEOSIDE_DIPHOSPHATE_BIOSYNTHETIC_PROCESS	SET	6	0.4236	0.0076843	0.40498	0.14779	0.872401293800539
GOBP_LYMPHOCYTE_AGGREGATION	SET	4	0.4833	0.0071588	0.46215	0.14784	0.872401293800539
GOCC_NUCLEOCYTOPLASMIC_TRANSPORT_COMPLEX	SET	12	0.28167	0.0072249	0.26936	0.14786	0.872401293800539
GOBP_RESPONSE_TO_FLUID_SHEAR_STRESS	SET	33	0.16569	0.0070437	0.15855	0.14801	0.872401293800539
GOBP_NEURAL_CREST_CELL_MIGRATION_INVOLVED_IN_AUTONOMIC_NERVOUS_SYSTEM_DEVELOPMENT	SET	6	0.35619	0.0064615	0.34087	0.14803	0.872401293800539
GOBP_REGULATION_OF_PINOCYTOSIS	SET	12	0.21089	0.0054094	0.20184	0.14806	0.872401293800539
GOMF_PHOSPHOLIPASE_A2_ACTIVITY	SET	34	0.15398	0.0066444	0.14739	0.14808	0.872401293800539
GOCC_GLYCOSYLPHOSPHATIDYLINOSITOL_N_ACETYLGLUCOSAMINYLTRANSFERASE_GPI_GNT_COMPLEX	SET	6	0.30374	0.0055099	0.29079	0.14813	0.872401293800539
GOBP_VESICLE_TRANSPORT_ALONG_ACTIN_FILAMENT	SET	8	0.32351	0.0067761	0.30987	0.14824	0.872401293800539
GOBP_POST_EMBRYONIC_DEVELOPMENT	SET	86	0.10404	0.0071299	0.099852	0.14871	0.872401293800539
GOBP_NEGATIVE_REGULATION_OF_TYROSINE_PHOSPHORYLATION_OF_STAT_PROTEIN	SET	9	0.31678	0.0070375	0.30423	0.14888	0.872401293800539
GOBP_NEGATIVE_REGULATION_OF_COLLATERAL_SPROUTING	SET	10	0.31406	0.0073543	0.30175	0.14899	0.872401293800539
GOBP_3_UTR_MEDIATED_MRNA_STABILIZATION	SET	21	0.18857	0.0063969	0.18122	0.14905	0.872401293800539
GOBP_NEGATIVE_REGULATION_OF_TRANSCRIPTION_BY_COMPETITIVE_PROMOTER_BINDING	SET	12	0.28648	0.0073481	0.27551	0.14923	0.872401293800539
GOBP_POSITIVE_REGULATION_OF_T_CELL_MEDIATED_IMMUNE_RESPONSE_TO_TUMOR_CELL	SET	5	0.29418	0.0048717	0.28304	0.14933	0.872401293800539
GOMF_SINGLE_STRANDED_DNA_HELICASE_ACTIVITY	SET	23	0.15552	0.0055209	0.14963	0.14933	0.872401293800539
GOCC_PLASMA_MEMBRANE_PROTEIN_COMPLEX	SET	578	0.038433	0.0067346	0.036981	0.14935	0.872401293800539
GOMF_SHORT_CHAIN_FATTY_ACYL_COA_DEHYDROGENASE_ACTIVITY	SET	5	0.32837	0.005438	0.31604	0.14941	0.872401293800539
GOBP_NEUROGENESIS	SET	1659	0.022915	0.0065911	0.022056	0.14943	0.872401293800539
GOMF_DYNACTIN_BINDING	SET	12	0.26153	0.0067083	0.25178	0.14948	0.872401293800539
GOBP_NEURAL_PLATE_DEVELOPMENT	SET	8	0.29761	0.0062336	0.28672	0.14965	0.872401293800539
[truncated: 8,659 more rows]

## Sheet: STable6
Supplemental Table6 Tissue prioritization for ALS using MAGMA Gene-property analysis of GTEx v8 gene expression datasets(Tissue N = 54) combined with Stage2 GWAS meta-analysis as implemented in FUMA(P.fdr< 0.05).
[truncated: 56 more rows]

[truncated: 13 more sheets: STable7, STable8, STable9, STable10, STable11, STable12, STable13, STable14, STable15, STable16, STable17, STable18, STable19]
